# Supplementary material
Source: Research Square preprint supplement (doi:10.21203/rs.3.rs-9317449/v1)
Supplement: Supplementary file 1 [file 156daf819664c6ebf0aaa7dc.docx]

**Appendix A. Description of Variables**

**Table A1. Definition and Measurement of Variables**

| **Variable** | **Measurement** | **Type** | **Categories** | **Expected sign** |
| --- | --- | --- | --- | --- |
| Access to primary education | Whether the child is enrolled in primary school at age six | Qualitative | 1 = enrolled;  0 = not enrolled | N/A |
| Women’s decision-making power | Relative income of the woman (share of the woman’s income in total couple income) | Quantitative | N/A | + |
| Men’s decision-making power | Relative income of the man (share of the man’s income in total couple income) | Quantitative | N/A | − |
| Intra-household resource allocation | Share of children’s education expenditure in total household expenditure | Quantitative | N/A | + |
| Age of household head | Age in years | Quantitative | N/A | Ambiguous |
| Household size | Number of individuals in the household | Quantitative | N/A | Ambiguous |
| Place of residence | Household location | Qualitative | 1 = urban;  0 = rural | Ambiguous |
| Education level of household head | Educational attainment of the household head | Qualitative | 1 = educated;  0 = not educated | + |
| Marital status of household head | Marital status | Qualitative | 1 = single;  2 = married (monogamous);  3 = cohabiting;  4 = divorced;  5 = widowed | Ambiguous |
| Religion of household head | Declared religion | Qualitative | 1 = Catholic;  2 = Protestant;  3 = Kimbanguist; 4 = Muslim;  5 = Other Christian;  6 = Animist;  7 = no religion | Ambiguous |
| Children’s education expenditure | Average monthly expenditure on education (in CDF) | Quantitative | N/A | + |
| Total household expenditure | Total monthly household expenditure (in CDF) | Quantitative | N/A | Ambiguous |
| Individual income | Income from primary and secondary activities (in CDF) | Quantitative | N/A | Ambiguous |
| Couple income | Total combined income of both spouses (in CDF) | Quantitative | N/A | Ambiguous |

**Note:**

- CDF refers to Congolese Francs. Relative income is calculated as the ratio of individual income to total household income.
- N/A indicates not applicable.
