# Supplementary material
Source: Research Square preprint supplement (doi:10.21203/rs.3.rs-9317449/v1)
Supplement: Supplementary file 2 [file 88f2f02d371a6792d525f96d.docx]

**CODEBOOK**

1. **Data Dictionary (Variable Description)**

**Q01 =** Pool number

**Q02 =** Sample number

**Q03 =** Stratum

**Q04 =** Sub-stratum

**SITE =** Site

**MENAGE =** Household

**M3 =** Sex

**M4 =** Relationship to household head

**M25 =** Nationality

**M27 =** Religion practiced

**ED06 =** Age at school entry (child)

**ED10 =** Child attended school during 2010/2011 school year

**HHID =** Household ID

**INID =** Individual ID

**IDIND =** Individual ID2

**NSITE =** Site ID

**NUMENAGE =** Household number

**NUMIND =** Individual number

**PROVINCE =** Province

**MILIEU =** Residence area (urban/rural context)

**SEXCM =** Sex of household head

**RELICM =** Religion of household head

**SITMATCM =** Marital status of household head

**GSENCM =** Socio-economic group of household head

**GRAGECM =** Age group of household head

**TAILM =** Household size

**REVACTP**= Primary income

**REVACTS** = Secondary income

**DEPALIM**= Food expenditure

**DEPBOI**= Drinks expenditure

**DEPHAB**= Clothing expenditure

**DEPLOG**= Housing expenditure

**DEPAME** = Furniture expenditure

**DEPSAN**= Health expenditure

**DEPTRA** = Transport expenditure

**DEPCOM**= Communication expenditure

**DEPLOI**= Leisure expenditure

**DEPEDU**= Education expenditure

**DEPRES**=Restaurant expenditure

**DEPBIEN**= Goods expenditure

**DEPTOT**= Total expenditure

1. **Variables for Empirical Analysis**

| **Variable** | **Measurement** | **Type** | **Categories** | **Expected sign** |
| --- | --- | --- | --- | --- |
| Access to primary education | Whether the child is enrolled in primary school at age six | Qualitative | 1 = enrolled;  0 = not enrolled | N/A |
| Women’s decision-making power | Relative income of the woman (share of the woman’s income in total couple income) | Quantitative | N/A | + |
| Men’s decision-making power | Relative income of the man (share of the man’s income in total couple income) | Quantitative | N/A | − |
| Intra-household resource allocation | Share of children’s education expenditure in total household expenditure | Quantitative | N/A | + |
| Age of household head | Age in years | Quantitative | N/A | Ambiguous |
| Household size | Number of individuals in the household | Quantitative | N/A | Ambiguous |
| Place of residence | Household location | Qualitative | 1 = urban;  0 = rural | Ambiguous |
| Education level of household head | Educational attainment of the household head | Qualitative | 1 = educated;  0 = not educated | + |
| Marital status of household head | Marital status | Qualitative | 1 = single;  2 = married (monogamous);  3 = cohabiting;  4 = divorced;  5 = widowed | Ambiguous |
| Religion of household head | Declared religion | Qualitative | 1 = Catholic;  2 = Protestant;  3 = Kimbanguist; 4 = Muslim;  5 = Other Christian;  6 = Animist;  7 = no religion | Ambiguous |
| Children’s education expenditure | Average monthly expenditure on education (in CDF) | Quantitative | N/A | + |
| Total household expenditure | Total monthly household expenditure (in CDF) | Quantitative | N/A | Ambiguous |
| Individual income | Income from primary and secondary activities (in CDF) | Quantitative | N/A | Ambiguous |
| Couple income | Total combined income of both spouses (in CDF) | Quantitative | N/A | Ambiguous |
