# Supplementary material
Source: Research Square preprint supplement (doi:10.21203/rs.3.rs-9317449/v1)
Supplement: Supplementary file 3 [file 99862d1a122e869c6e043238.xlsx]

## Sheet: Feuil1
SITE	MENAGE	Q01	Q02	Q03	Q04	M3	M4	M25	M27	ED06	ED10	HHID	INID	IDIND	NSITE	NUMENAGE	NUMIND	PROVINCE	MILIEU	SEXCM	RELICM	SITMATCM	GSENCM	GRAGECM	TAILM	REVACTP	REVACTS	DEPALIM	DEPBOI	DEPHAB	DEPLOG	DEPAME	DEPSAN	DEPTRA	DEPCOM	DEPLOI	DEPEDU	DEPRES	DEPBIEN	DEPTOT	_merge	part_dep_educ	distrub_intra	Age6	Accès_educ	Accès_educ_	Age	Grpe_socioEco	religion
530	1	Kinshasa Cluster	55	Kinshasa	Urban	Female	Other parent	Congolaise	None	6	No	53001	5300110	10	530	1	10	Kinshasa	Urban	Female	Protestant	Widowed	Inactive	60-64	12			951600	0	5000	317917	73237	6000	0	48000	0	0	0	14400	1416154	Matched (3)	0	0	6	No	No	7	Inactive	None
7240	1	Isiro Cluster	1	Haut-Uele	Rural	Male	Child of the household head	Congolaise	Catholic	6	Yes	724001	72400108	8	7240	1	8	Province Orientale	Rural	Male	Catholic	Married (monogamous)	Informal agricultural	65-69	10			2756812	175200	48000	815936	369200	0	0	0	8000	0	0	229360	4402508	Matched (3)	0	0	6	Yes	Yes	10	Informal agricultural	Catholic
2370	1	Mbuji-Mayi Cluster	999	Kasai-Orient	Urban	Female	Child of the household head	Congolaise	Protestant	6	Yes	237001	23700106	6	2370	1	6	Kasaî Oriental	Urban	Male	Protestant	Married (monogamous)	Public	55-59	8			2756812	175200	48000	815936	369200	0	0	0	8000	0	0	229360	4402508	Matched (3)	0	0	6	Yes	Yes	14	Public	Protestant
2450	1	Mbuji-Mayi Cluster	999	Kasai-Orient	Urban	Male	Child of the household head	Congolaise	Other religion	6	Yes	245001	24500103	3	2450	1	3	Kasaî Oriental	Urban	Male	Other religion	Married (monogamous)	Informal non-agricultural	35-39	7			702438	0	76015	334251	50677	5631	0	0	0	0	0	0	1169012	Matched (3)	0	0	6	Yes	Yes	9	Informal non-agricultural	Other religion
1360	1	Kisangani Cluster	2	Tshopo	Urban	Female	Spouse of the household head	Congolaise	Other Christian	6	No	136001	13600102	2	1360	1	2	Province Orientale	Urban	Male	Other Christian	Married (monogamous)	Formal private sector	.a	3	60000		2756812	175200	48000	815936	369200	0	0	0	8000	0	0	229360	4402508	Matched (3)	0	0	6	No	No	34	Formal private sector	Other Christian
3403	1	Pool de Lisa	65	Mongala	Township	Male	Chef de ménage	Congolaise	Other Christian	6	Yes	340301	34030101	1	3403	1	1	Equateur	Urban	Male	Other Christian	Single	Inactive	20-24	1			2756812	175200	48000	815936	369200	0	0	0	8000	0	0	229360	4402508	Matched (3)	0	0	6	Yes	Yes	22	Inactive	Other Christian
7030	1	Pool de Bun	4	Ituri	Rural	Male	Chef de ménage	Congolaise	Catholic	6	No	703001	70300101	1	7030	1	1	Province Orientale	Rural	Male	Catholic	Married (monogamous)	Inactive	50-54	2			2756812	175200	48000	815936	369200	0	0	0	8000	0	0	229360	4402508	Matched (3)	0	0	6	No	No	52	Inactive	Catholic
7190	1	Isiro Cluster	3	Haut-Uele	Rural	Male	Chef de ménage	Congolaise	Catholic	6	No	719001	71900101	1	7190	1	1	Province Orientale	Rural	Male	Catholic	Cohabiting	Informal agricultural	55-59	8	40000		924760	0	3000	286700	77840	0	0	0	0	0	0	2440	1294740	Matched (3)	0	0	6	No	No	58	Informal agricultural	Catholic
1300	1	Pool de Gbad	13	Nord-Ubangi	Urban	Male	Child of the household head	Congolaise	Protestant	6	Yes	130001	13000103	3	1300	1	3	Equateur	Urban	Male	Protestant	Married (monogamous)	Informal agricultural	45-49	6			2756812	175200	48000	815936	369200	0	0	0	8000	0	0	229360	4402508	Matched (3)	0	0	6	Yes	Yes	19	Informal agricultural	Protestant
4690	1	Pool de Mwen	999	Lomami	Township	Female	Child of the household head	Congolaise	Other religion	6	Yes	469001	46900106	6	4690	1	6	Kasaî Oriental	Urban	Male	Other religion	Married (monogamous)	Public	35-39	9			2756812	175200	48000	815936	369200	0	0	0	8000	0	0	229360	4402508	Matched (3)	0	0	6	Yes	Yes	15	Public	Other religion
8690	1	Pool de Lika	999	Haut-Katanga	Rural	Male	Chef de ménage	Congolaise	Other religion	6	No	869001	86900101	1	8690	1	1	Katanga	Rural	Male	Other religion	Married (monogamous)	Informal agricultural	45-49	9	202206.1069	14119.23152	401360	2440	11000	157834	5930	400	800	0	1800	2000	8000	1200	592764	Matched (3)	.3374024	.3374024	6	No	No	45	Informal agricultural	Other religion
5730	1	Pool de Mban	4	Equateur	Rural	Female	Child of the household head	Congolaise	Protestant	6	Yes	573001	57300104	4	5730	1	4	Equateur	Rural	Male	Protestant	Married (polygamous)	Informal agricultural	35-39	7			527040	0	0	7320	48800	0	0	0	0	0	0	0	583160	Matched (3)	0	0	6	Yes	Yes	8	Informal agricultural	Protestant
3430	1	Pool de Bas	2	Tshopo	Township	Female	Spouse of the household head	Congolaise	Catholic	6	No	343001	34300102	2	3430	1	2	Province Orientale	Urban	Male	Catholic	Married (monogamous)	Informal agricultural	55-59	7			1234700	0	64000	786549	24400	11400	0	0	3100	0	0	4400	2128549	Matched (3)	0	0	6	No	No	65	Informal agricultural	Catholic
510	1	Kinshasa Cluster	28	Kinshasa	Urban	Male	Chef de ménage	Congolaise	Other Christian	6	No	51001	5100101	1	510	1	1	Kinshasa	Urban	Male	Other Christian	Married (monogamous)	Formal private sector	40-44	5	90000		1744260	0	65000	481273	45280	2600	18000	20000	1200	450000	0	31320	2858933	Matched (3)	15.74014	15.74014	6	No	No	40	Formal private sector	Other Christian
4450	1	Mbuji-Mayi Cluster	999	Kasai-Orient	Township	Male	Chef de ménage	Congolaise	Other Christian	6	No	445001	44500101	1	4450	1	1	Kasaî Oriental	Urban	Male	Other Christian	Married (monogamous)	Informal agricultural	55-59	9			2756812	175200	48000	815936	369200	0	0	0	8000	0	0	229360	4402508	Matched (3)	0	0	6	No	No	58	Informal agricultural	Other Christian
1750	1	Pool de Goma	55	Nord-Kivu	Urban	Female	Other parent	Congolaise	Protestant	6	Yes	175001	17500103	3	1750	1	3	Nord-Kivu	Urban	Female	Catholic	Widowed	Inactive	60-64	4			684420	0	0	13927	0	0	0	0	0	0	0	0	698347	Matched (3)	0	0	6	Yes	Yes	22	Inactive	Protestant
3550	1	Pool de Bun	9	Ituri	Township	Male	Child of the household head	Congolaise	Catholic	6	Yes	355001	35500103	3	3550	1	3	Province Orientale	Urban	Male	Catholic	Married (monogamous)	Informal non-agricultural	40-44	5			2756812	175200	48000	815936	369200	0	0	0	8000	0	0	229360	4402508	Matched (3)	0	0	6	Yes	Yes	23	Informal non-agricultural	Catholic
4990	1	Pool de Song	2	Kongo Centra	Rural	Female	Spouse of the household head	Congolaise	Kimbanguist	6	No	499001	49900102	2	4990	1	2	Bas-Congo	Rural	Male	Kimbanguist	Married (monogamous)	Informal non-agricultural	50-54	8	56000		2756812	175200	48000	815936	369200	0	0	0	8000	0	0	229360	4402508	Matched (3)	0	0	6	No	No	43	Informal non-agricultural	Kimbanguist
5310	1	Pool de Kikw	1	Kwilu	Rural	Male	Child of the household head	Congolaise	Animist	6	Yes	531001	53100103	3	5310	1	3	Bandundu	Rural	Female	Other Christian	Widowed	Informal agricultural	50-54	4	20000		2756812	175200	48000	815936	369200	0	0	0	8000	0	0	229360	4402508	Matched (3)	0	0	6	Yes	Yes	21	Informal agricultural	Animist
3540	1	Pool de Bun	17	Ituri	Township	Female	Spouse of the household head	Congolaise	Catholic	6	No	354001	35400102	2	3540	1	2	Province Orientale	Urban	Male	Catholic	Married (monogamous)	Inactive	35-39	5			2756812	175200	48000	815936	369200	0	0	0	8000	0	0	229360	4402508	Matched (3)	0	0	6	No	No	26	Inactive	Catholic
6380	1	Pool de Lisa	4	Mongala	Rural	Male	Chef de ménage	Congolaise	Other Christian	6	No	638001	63800101	1	6380	1	1	Equateur	Rural	Male	Other Christian	Married (monogamous)	Informal agricultural	35-39	7	75000	150000	2756812	175200	48000	815936	369200	0	0	0	8000	0	0	229360	4402508	Matched (3)	0	0	6	No	No	38	Informal agricultural	Other Christian
7190	1	Isiro Cluster	3	Haut-Uele	Rural	Female	Child of the household head	Congolaise	Catholic	6	No	719001	71900104	4	7190	1	4	Province Orientale	Rural	Male	Catholic	Cohabiting	Informal agricultural	55-59	8			2756812	175200	48000	815936	369200	0	0	0	8000	0	0	229360	4402508	Matched (3)	0	0	6	No	No	24	Informal agricultural	Catholic
1000	1	Pool de Kikw	4	Kwilu	Urban	Female	Child of the household head	Congolaise	Protestant	6	Yes	100001	10000103	3	1000	1	3	Bandundu	Urban	Male	Protestant	Cohabiting	Public	45-49	7			2756812	175200	48000	815936	369200	0	0	0	8000	0	0	229360	4402508	Matched (3)	0	0	6	Yes	Yes	19	Public	Protestant
1860	1	Pool de Buka	54	Sud-Kivu	Urban	Male	Child of the household head	Congolaise	Protestant	6	Yes	186001	18600103	3	1860	1	3	Sud-Kivu	Urban	Male	Protestant	Married (polygamous)	Chomeurs	45-49	4			2756812	175200	48000	815936	369200	0	0	0	8000	0	0	229360	4402508	Matched (3)	0	0	6	Yes	Yes	9	Chomeurs	Protestant
6650	1	Pool de Boen	5	Tshuapa	Rural	Female	Other person	Congolaise	Other Christian	6	No	665001	66500107	7	6650	1	7	Equateur	Rural	Male	Other religion	Married (monogamous)	Informal agricultural	50-54	6			2756812	175200	48000	815936	369200	0	0	0	8000	0	0	229360	4402508	Matched (3)	0	0	6	No	No	30	Informal agricultural	Other Christian
9560	1	Pool de Kana	999	Kasai-Centra	Rural	Male	Chef de ménage	Congolaise	Other Christian	6	No	956001	95600101	1	9560	1	1	Kasaî occidental	Rural	Male	Other Christian	Widowed	Informal agricultural	35-39	2	26000		2756812	175200	48000	815936	369200	0	0	0	8000	0	0	229360	4402508	Matched (3)	0	0	6	No	No	38	Informal agricultural	Other Christian
5800	1	Pool de Basa	2	Equateur	Rural	Female	Child of the household head	Congolaise	Catholic	6	Yes	580001	58000103	3	5800	1	3	Equateur	Rural	Male	Catholic	Married (monogamous)	Public	45-49	10			2756812	175200	48000	815936	369200	0	0	0	8000	0	0	229360	4402508	Matched (3)	0	0	6	Yes	Yes	17	Public	Catholic
4063	1	Pool de Kolw	999	Lualaba	Township	Male	Chef de ménage	Congolaise	Catholic	6	No	406301	40630101	1	4063	1	1	Katanga	Urban	Male	Catholic	Married (monogamous)	Informal non-agricultural	35-39	1	330000		2756812	175200	48000	815936	369200	0	0	0	8000	0	0	229360	4402508	Matched (3)	0	0	6	No	No	38	Informal non-agricultural	Catholic
9550	1	Pool de Kana	999	Kasai-Centra	Rural	Female	Other parent	Congolaise	Protestant	6	Yes	955001	95500103	3	9550	1	3	Kasaî occidental	Rural	Female	Catholic	Widowed	Informal agricultural	55-59	4			2756812	175200	48000	815936	369200	0	0	0	8000	0	0	229360	4402508	Matched (3)	0	0	6	Yes	Yes	7	Informal agricultural	Protestant
1100	1	Pool de Mban	4	Equateur	Urban	Male	Child of the household head	Congolaise	Protestant	6	Yes	110001	11000105	5	1100	1	5	Equateur	Urban	Male	Protestant	Married (monogamous)	Informal non-agricultural	45-49	12			1028009	79855	48000	153612	69245	0	0	0	0	0	0	39927	1418648	Matched (3)	0	0	6	Yes	Yes	10	Informal non-agricultural	Protestant
3490	1	Pool de Bas	3	Tshopo	Township	Female	Child of the household head	Congolaise	Other religion	6	Yes	349001	34900105	5	3490	1	5	Province Orientale	Urban	Male	Other religion	Married (monogamous)	Public	45-49	10			2756812	175200	48000	815936	369200	0	0	0	8000	0	0	229360	4402508	Matched (3)	0	0	6	Yes	Yes	13	Public	Other religion
7950	1	Pool de Kind	1	Maniema	Rural	Male	Chef de ménage	Congolaise	Protestant	6	No	795001	79500101	1	7950	1	1	Maniema	Rural	Male	Protestant	Married (monogamous)	Informal agricultural	30-34	8	1500	10000	1157780	0	86800	123862	24400	88600	201200	0	0	0	0	14640	1697282	Matched (3)	0	0	6	No	No	31	Informal agricultural	Protestant
4270	1	Pool de Mano	999	Tanganyka	Township	Female	Spouse of the household head	Congolaise	Other Christian	6	No	427001	42700102	2	4270	1	2	Katanga	Urban	Male	Other Christian	Married (monogamous)	Informal non-agricultural	30-34	5	8000		2756812	175200	48000	815936	369200	0	0	0	8000	0	0	229360	4402508	Matched (3)	0	0	6	No	No	25	Informal non-agricultural	Other Christian
1830	1	Pool de Buka	42	Sud-Kivu	Urban	Female	Child of the household head	Congolaise	Catholic	6	Yes	183001	18300102	2	1830	1	2	Sud-Kivu	Urban	Male	Protestant	Divorced	Informal non-agricultural	35-39	8			309880	0	81000	13927	26718	12000	17000	0	5900	200	0	15600	482226	Matched (3)	.0414744	.0414744	6	Yes	Yes	16	Informal non-agricultural	Catholic
4620	1	Pool de Kabi	999	Lomami	Township	Female	Other parent	Congolaise	Protestant	6	Yes	462001	46200109	9	4620	1	9	Kasaî occidental	Urban	Female	Catholic	Widowed	Informal non-agricultural	65-69	10			2756812	175200	48000	815936	369200	0	0	0	8000	0	0	229360	4402508	Matched (3)	0	0	6	Yes	Yes	13	Informal non-agricultural	Protestant
2180	1	Pool de Lika	999	Haut-Katanga	Urban	Male	Chef de ménage	Congolaise	Other Christian	6	No	218001	21800101	1	2180	1	1	Katanga	Urban	Male	Other Christian	Married (monogamous)	Informal non-agricultural	25-29	4	101626.3391		2756812	175200	48000	815936	369200	0	0	0	8000	0	0	229360	4402508	Matched (3)	0	0	6	No	No	29	Informal non-agricultural	Other Christian
6150	1	Pool de Gbad	76	Nord-Ubangi	Rural	Male	Child of the household head	Congolaise	Other Christian	6	No	615001	61500103	3	6150	1	3	Equateur	Rural	Male	Other Christian	Married (monogamous)	Informal agricultural	45-49	8			2756812	175200	48000	815936	369200	0	0	0	8000	0	0	229360	4402508	Matched (3)	0	0	6	No	No	17	Informal agricultural	Other Christian
2410	1	Mbuji-Mayi Cluster	999	Kasai-Orient	Urban	Male	Chef de ménage	Congolaise	Catholic	6	No	241001	24100101	1	2410	1	1	Kasaî Oriental	Urban	Male	Catholic	Married (monogamous)	Informal non-agricultural	25-29	3	27600		790520	21960	0	168814	24400	0	0	9760	14640	0	0	100520	1130614	Matched (3)	0	0	6	No	No	28	Informal non-agricultural	Catholic
4130	1	Pool de Kami	999	Haut-Lomami	Township	Male	Child of the household head	Congolaise	Protestant	6	Yes	413001	41300106	6	4130	1	6	Katanga	Urban	Male	Protestant	Married (monogamous)	Inactive	55-59	8			772260	0	0	112903	14640	0	0	0	0	0	0	91500	991303	Matched (3)	0	0	6	Yes	Yes	14	Inactive	Protestant
3510	1	Pool de Bun	15	Ituri	Township	Male	Child of the household head	Congolaise	Catholic	6	Yes	351001	35100109	9	3510	1	9	Province Orientale	Urban	Male	Catholic	Married (monogamous)	Public	60-64	18			2756812	175200	48000	815936	369200	0	0	0	8000	0	0	229360	4402508	Matched (3)	0	0	6	Yes	Yes	13	Public	Catholic
4760	1	Pool de Kana	999	Kasai-Centra	Township	Male	Child of the household head	Congolaise	Other Christian	6	Yes	476001	47600114	14	4760	1	14	Kasaî occidental	Urban	Male	Other Christian	Married (monogamous)	Public	60-64	15			781820	0	9600	0	12000	0	0	0	3000	18000	0	1000	825420	Matched (3)	2.180708	2.180708	6	Yes	Yes	26	Public	Other Christian
3380	1	Pool de Lisa	208	Mongala	Township	Male	Child of the household head	Congolaise	Catholic	6	Yes	338001	33800105	5	3380	1	5	Equateur	Urban	Male	Catholic	Married (polygamous)	Informal non-agricultural	65-69	9			1069940	95160	0	812591	35380	0	119560	84180	0	0	0	41480	2258291	Matched (3)	0	0	6	Yes	Yes	15	Informal non-agricultural	Catholic
4570	1	Pool de Lusa	999	Sankuru	Township	Male	Child of the household head	Congolaise	Catholic	6	Yes	457001	45700106	6	4570	1	6	Kasaî Oriental	Urban	Male	Catholic	Married (polygamous)	Public	40-44	8			2756812	175200	48000	815936	369200	0	0	0	8000	0	0	229360	4402508	Matched (3)	0	0	6	Yes	Yes	9	Public	Catholic
4610	1	Pool de Lusa	999	Sankuru	Township	Male	Child of the household head	Congolaise	Other Christian	6	Yes	461001	46100107	7	4610	1	7	Kasaî Oriental	Urban	Male	None	Married (polygamous)	Public	50-54	13			2756812	175200	48000	815936	369200	0	0	0	8000	0	0	229360	4402508	Matched (3)	0	0	6	Yes	Yes	14	Public	Other Christian
9220	1	Pool de Lodj	6	Sankuru	Rural	Female	Child of the household head	Congolaise	Catholic	6	Yes	922001	92200106	6	9220	1	6	Kasaî Oriental	Rural	Male	Catholic	Married (monogamous)	Public	65-69	10			2756812	175200	48000	815936	369200	0	0	0	8000	0	0	229360	4402508	Matched (3)	0	0	6	Yes	Yes	18	Public	Catholic
2820	1	Pool de Tshi	999	Kasai	Urban	Male	Chef de ménage	Congolaise	Other religion	6	No	282001	28200101	1	2820	1	1	Kasaî occidental	Urban	Male	Other religion	Married (monogamous)	Informal non-agricultural	35-39	3	90000		2756812	175200	48000	815936	369200	0	0	0	8000	0	0	229360	4402508	Matched (3)	0	0	6	No	No	36	Informal non-agricultural	Other religion
1920	1	Pool de Buka	37	Sud-Kivu	Urban	Female	Child of the household head	Congolaise	Catholic	6	Yes	192001	19200104	4	1920	1	4	Sud-Kivu	Urban	Male	Catholic	Married (monogamous)	Chomeurs	30-34	9			2756812	175200	48000	815936	369200	0	0	0	8000	0	0	229360	4402508	Matched (3)	0	0	6	Yes	Yes	17	Chomeurs	Catholic
7990	1	Pool de Kibo	1	Maniema	Rural	Female	Spouse of the household head	Congolaise	Protestant	6	No	799001	79900102	2	7990	1	2	Maniema	Rural	Male	Protestant	Married (monogamous)	Public	30-34	8	0		1107854	16892	84462	13927	14077	0	0	0	0	0	0	16892	1254104	Matched (3)	0	0	6	No	No	25	Public	Protestant
2290	1	Pool de Lubu	999	Haut-Katanga	Urban	Female	Spouse of the household head	Congolaise	Protestant	6	No	229001	22900102	2	2290	1	2	Katanga	Urban	Male	Protestant	Married (monogamous)	Informal agricultural	35-39	6			2756812	175200	48000	815936	369200	0	0	0	8000	0	0	229360	4402508	Matched (3)	0	0	6	No	No	29	Informal agricultural	Protestant
1900	1	Pool de Buka	77	Sud-Kivu	Urban	Female	Child of the household head	Congolaise	Protestant	6	Yes	190001	19000105	5	1900	1	5	Sud-Kivu	Urban	Male	Protestant	Married (monogamous)	Informal non-agricultural	55-59	10			2756812	175200	48000	815936	369200	0	0	0	8000	0	0	229360	4402508	Matched (3)	0	0	6	Yes	Yes	10	Informal non-agricultural	Protestant
320	1	Kinshasa Cluster	19	Kinshasa	Urban	Female	Child of the household head	Congolaise	Other Christian	6	No	32001	3200104	4	320	1	4	Kinshasa	Urban	Male	Other Christian	Married (monogamous)	Public	55-59	6			2756812	175200	48000	815936	369200	0	0	0	8000	0	0	229360	4402508	Matched (3)	0	0	6	No	No	22	Public	Other Christian
2892	1	Pool de Song	2	Kongo Centra	Township	Male	Chef de ménage	Congolaise	Kimbanguist	6	No	289201	28920101	1	2892	1	1	Bas-Congo	Urban	Male	Kimbanguist	Married (monogamous)	Public	45-49	8	58150		2756812	175200	48000	815936	369200	0	0	0	8000	0	0	229360	4402508	Matched (3)	0	0	6	No	No	47	Public	Kimbanguist
2050	1	Pool de Kolw	999	Lualaba	Urban	Female	Spouse of the household head	Congolaise	Catholic	6	No	205001	20500102	2	2050	1	2	Katanga	Urban	Male	Catholic	Married (monogamous)	Inactive	75-79	3			2756812	175200	48000	815936	369200	0	0	0	8000	0	0	229360	4402508	Matched (3)	0	0	6	No	No	70	Inactive	Catholic
5780	1	Pool de Basa	20	Equateur	Rural	Female	Spouse of the household head	Congolaise	Other Christian	6	No	578001	57800102	2	5780	1	2	Equateur	Rural	Male	Other Christian	Married (monogamous)	Informal agricultural	30-34	6	12822.25088		2756812	175200	48000	815936	369200	0	0	0	8000	0	0	229360	4402508	Matched (3)	0	0	6	No	No	24	Informal agricultural	Other Christian
2080	1	Pool de Kolw	999	Lualaba	Urban	Female	Spouse of the household head	Congolaise	Protestant	6	No	208001	20800102	2	2080	1	2	Katanga	Urban	Male	Catholic	Cohabiting	Formal private sector	40-44	2			2756812	175200	48000	815936	369200	0	0	0	8000	0	0	229360	4402508	Matched (3)	0	0	6	No	No	33	Formal private sector	Protestant
1100	1	Pool de Mban	4	Equateur	Urban	Female	Other person	Congolaise	Catholic	6	No	110001	11000112	12	1100	1	12	Equateur	Urban	Male	Protestant	Married (monogamous)	Informal non-agricultural	45-49	12	5000	20000	2756812	175200	48000	815936	369200	0	0	0	8000	0	0	229360	4402508	Matched (3)	0	0	6	No	No	13	Informal non-agricultural	Catholic
9250	1	Pool de Lusa	999	Sankuru	Rural	Female	Spouse of the household head	Congolaise	Other Christian	6	No	925001	92500102	2	9250	1	2	Kasaî Oriental	Rural	Male	Other Christian	Married (polygamous)	Public	30-34	6	20000		2756812	175200	48000	815936	369200	0	0	0	8000	0	0	229360	4402508	Matched (3)	0	0	6	No	No	25	Public	Other Christian
3510	1	Pool de Bun	15	Ituri	Township	Female	Child of the household head	Congolaise	Catholic	6	Yes	351001	35100107	7	3510	1	7	Province Orientale	Urban	Male	Catholic	Married (monogamous)	Public	60-64	18			2756812	175200	48000	815936	369200	0	0	0	8000	0	0	229360	4402508	Matched (3)	0	0	6	Yes	Yes	18	Public	Catholic
1020	1	Pool de Kikw	119	Kwilu	Urban	Male	Child of the household head	Congolaise	Catholic	6	Yes	102001	10200104	4	1020	1	4	Bandundu	Urban	Male	Catholic	Married (monogamous)	Informal non-agricultural	35-39	7			2756812	175200	48000	815936	369200	0	0	0	8000	0	0	229360	4402508	Matched (3)	0	0	6	Yes	Yes	9	Informal non-agricultural	Catholic
6830	1	Pool de Bas	2	Tshopo	Rural	Male	Chef de ménage	Congolaise	Other religion	6	No	683001	68300101	1	6830	1	1	Province Orientale	Rural	Male	Other religion	Married (monogamous)	Informal agricultural	25-29	4	14769.04953	5500	2756812	175200	48000	815936	369200	0	0	0	8000	0	0	229360	4402508	Matched (3)	0	0	6	No	No	26	Informal agricultural	Other religion
8370	1	Pool de Kami	3	Haut-Lomami	Rural	Male	Other person	Missing	Other Christian	6	No	837001	83700108	8	8370	1	8	Katanga	Rural	Male	Other Christian	Married (polygamous)	Informal agricultural	45-49	7			2756812	175200	48000	815936	369200	0	0	0	8000	0	0	229360	4402508	Matched (3)	0	0	6	No	No	23	Informal agricultural	Other Christian
720	1	Pool de Mata	36	Kongo Centra	Urban	Male	Child of the household head	Congolaise	Other Christian	6	Yes	72001	7200106	6	720	1	6	Bas-Congo	Urban	Male	Protestant	Married (monogamous)	Public	40-44	6			2756812	175200	48000	815936	369200	0	0	0	8000	0	0	229360	4402508	Matched (3)	0	0	6	Yes	Yes	6	Public	Other Christian
2060	1	Pool de Kolw	999	Lualaba	Urban	Male	Child of the household head	Congolaise	Protestant	6	Yes	206001	20600106	6	2060	1	6	Katanga	Urban	Male	Protestant	Married (monogamous)	Formal private sector	45-49	6			2756812	175200	48000	815936	369200	0	0	0	8000	0	0	229360	4402508	Matched (3)	0	0	6	Yes	Yes	6	Formal private sector	Protestant
1400	1	Kisangani Cluster	2	Tshopo	Urban	Female	Other parent	Congolaise	Other Christian	6	Yes	140001	14000106	6	1400	1	6	Province Orientale	Urban	Male	Other Christian	Married (monogamous)	Inactive	25-29	7			2756812	175200	48000	815936	369200	0	0	0	8000	0	0	229360	4402508	Matched (3)	0	0	6	Yes	Yes	20	Inactive	Other Christian
8730	1	Pool de Lika	999	Haut-Katanga	Rural	Female	Spouse of the household head	Congolaise	Other Christian	6	No	873001	87300102	2	8730	1	2	Katanga	Rural	Male	Catholic	Married (monogamous)	Informal agricultural	70-74	2	42384.54356		1147972	0	68300	160055	76340	27420	0	89670	45440	150000	64400	33200	1862796	Matched (3)	8.052409	8.052409	6	No	No	63	Informal agricultural	Other Christian
1860	1	Pool de Buka	54	Sud-Kivu	Urban	Male	Chef de ménage	Congolaise	Protestant	6	No	186001	18600101	1	1860	1	1	Sud-Kivu	Urban	Male	Protestant	Married (polygamous)	Chomeurs	45-49	4			2756812	175200	48000	815936	369200	0	0	0	8000	0	0	229360	4402508	Matched (3)	0	0	6	No	No	48	Chomeurs	Protestant
5050	1	Pool de Mata	1	Kongo Centra	Rural	Male	Chef de ménage	Congolaise	Catholic	6	No	505001	50500101	1	5050	1	1	Bas-Congo	Rural	Male	Catholic	Cohabiting	Informal agricultural	20-24	4	30000		2756812	175200	48000	815936	369200	0	0	0	8000	0	0	229360	4402508	Matched (3)	0	0	6	No	No	24	Informal agricultural	Catholic
2730	1	Pool de Tshi	999	Kasai	Urban	Female	Father or mother	Congolaise	Other Christian	6	No	273001	27300107	7	2730	1	7	Kasaî occidental	Urban	Male	Other Christian	Married (monogamous)	Informal non-agricultural	35-39	7			2756812	175200	48000	815936	369200	0	0	0	8000	0	0	229360	4402508	Matched (3)	0	0	6	No	No	67	Informal non-agricultural	Other Christian
2760	1	Pool de Tshi	999	Kasai	Urban	Female	Chef de ménage	Congolaise	Animist	6	No	276001	27600101	1	2760	1	1	Kasaî occidental	Urban	Female	Animist	Widowed	Inactive	50-54	2			2756812	175200	48000	815936	369200	0	0	0	8000	0	0	229360	4402508	Matched (3)	0	0	6	No	No	52	Inactive	Animist
7400	1	Pool de Buta	1	Bas-Uele	Rural	Male	Child of the household head	Congolaise	Protestant	6	Yes	740001	74000104	4	7400	1	4	Province Orientale	Rural	Male	Protestant	Married (monogamous)	Informal agricultural	65-69	4			2756812	175200	48000	815936	369200	0	0	0	8000	0	0	229360	4402508	Matched (3)	0	0	6	Yes	Yes	17	Informal agricultural	Protestant
4062	1	Pool de Kolw	999	Lualaba	Township	Male	Child of the household head	Congolaise	Protestant	6	Yes	406201	40620104	4	4062	1	4	Katanga	Urban	Male	Protestant	Married (monogamous)	Informal non-agricultural	30-34	7			2756812	175200	48000	815936	369200	0	0	0	8000	0	0	229360	4402508	Matched (3)	0	0	6	Yes	Yes	6	Informal non-agricultural	Protestant
1900	1	Pool de Buka	77	Sud-Kivu	Urban	Female	Other parent	Congolaise	Protestant	6	Yes	190001	19000107	7	1900	1	7	Sud-Kivu	Urban	Male	Protestant	Married (monogamous)	Informal non-agricultural	55-59	10			2756812	175200	48000	815936	369200	0	0	0	8000	0	0	229360	4402508	Matched (3)	0	0	6	Yes	Yes	17	Informal non-agricultural	Protestant
7740	1	Pool de Buka	52	Sud-Kivu	Rural	Male	Child of the household head	Congolaise	Other religion	6	Yes	774001	77400107	7	7740	1	7	Sud-Kivu	Rural	Male	Other religion	Married (monogamous)	Informal non-agricultural	40-44	10			2756812	175200	48000	815936	369200	0	0	0	8000	0	0	229360	4402508	Matched (3)	0	0	6	Yes	Yes	11	Informal non-agricultural	Other religion
820	1	Pool de Band	39	Kwilu	Urban	Male	Child of the household head	Congolaise	Other Christian	6	Yes	82001	8200104	4	820	1	4	Bandundu	Urban	Female	Catholic	Widowed	Informal non-agricultural	55-59	7			2756812	175200	48000	815936	369200	0	0	0	8000	0	0	229360	4402508	Matched (3)	0	0	6	Yes	Yes	17	Informal non-agricultural	Other Christian
4360	1	Pool de Lubu	999	Haut-Katanga	Township	Female	Spouse of the household head	Congolaise	Protestant	6	No	436001	43600102	2	4360	1	2	Katanga	Urban	Male	Protestant	Married (monogamous)	Informal agricultural	40-44	9			2756812	175200	48000	815936	369200	0	0	0	8000	0	0	229360	4402508	Matched (3)	0	0	6	No	No	34	Informal agricultural	Protestant
9340	1	Pool de Kabi	999	Lomami	Rural	Male	Child of the household head	Congolaise	Protestant	6	Yes	934001	93400102	2	9340	1	2	Kasaî occidental	Rural	Female	Protestant	Divorced	Informal agricultural	30-34	3			2756812	175200	48000	815936	369200	0	0	0	8000	0	0	229360	4402508	Matched (3)	0	0	6	Yes	Yes	11	Informal agricultural	Protestant
3490	1	Pool de Bas	3	Tshopo	Township	Female	Child of the household head	Congolaise	Other religion	6	Yes	349001	34900103	3	3490	1	3	Province Orientale	Urban	Male	Other religion	Married (monogamous)	Public	45-49	10			2756812	175200	48000	815936	369200	0	0	0	8000	0	0	229360	4402508	Matched (3)	0	0	6	Yes	Yes	20	Public	Other religion
420	1	Kinshasa Cluster	19	Kinshasa	Urban	Male	Child of the household head	Congolaise	Catholic	6	Yes	42001	4200106	6	420	1	6	Kinshasa	Urban	Male	Catholic	Married (monogamous)	Public	50-54	9			2756812	175200	48000	815936	369200	0	0	0	8000	0	0	229360	4402508	Matched (3)	0	0	6	Yes	Yes	13	Public	Catholic
3310	1	Pool de Gbad	28	Nord-Ubangi	Township	Male	Other parent	Congolaise	Protestant	6	Yes	331001	33100104	4	3310	1	4	Equateur	Urban	Male	Protestant	Single	Informal agricultural	25-29	4	8732.074288		2756812	175200	48000	815936	369200	0	0	0	8000	0	0	229360	4402508	Matched (3)	0	0	6	Yes	Yes	17	Informal agricultural	Protestant
3611	1	Isiro Cluster	3	Haut-Uele	Township	Female	Child of the household head	Congolaise	Catholic	6	Yes	361101	36110103	3	3611	1	3	Province Orientale	Urban	Female	Catholic	Cohabiting	Informal non-agricultural	30-34	6			2756812	175200	48000	815936	369200	0	0	0	8000	0	0	229360	4402508	Matched (3)	0	0	6	Yes	Yes	7	Informal non-agricultural	Catholic
8860	1	Pool de Kase	999	Haut-Katanga	Rural	Male	Chef de ménage	Congolaise	Protestant	6	No	886001	88600101	1	8860	1	1	Katanga	Rural	Male	Protestant	Married (monogamous)	Informal agricultural	30-34	3	11000	44000	2756812	175200	48000	815936	369200	0	0	0	8000	0	0	229360	4402508	Matched (3)	0	0	6	No	No	30	Informal agricultural	Protestant
1830	1	Pool de Buka	42	Sud-Kivu	Urban	Male	Child of the household head	Congolaise	None	6	Yes	183001	18300105	5	1830	1	5	Sud-Kivu	Urban	Male	Protestant	Divorced	Informal non-agricultural	35-39	8			1180190	0	87900	180980	96940	71560	20000	4000	56040	57600	0	54520	1809730	Matched (3)	3.182795	3.182795	6	Yes	Yes	8	Informal non-agricultural	None
20	1	Kinshasa Cluster	6	Kinshasa	Urban	Female	Other parent	Congolaise	Catholic	6	Yes	2001	200106	6	20	1	6	Kinshasa	Urban	Male	Catholic	Married (monogamous)	Public	60-64	8			2756812	175200	48000	815936	369200	0	0	0	8000	0	0	229360	4402508	Matched (3)	0	0	6	Yes	Yes	40	Public	Catholic
3300	1	Pool de Gbad	9	Nord-Ubangi	Township	Male	Child of the household head	Congolaise	Other Christian	6	Yes	330001	33000112	12	3300	1	12	Equateur	Urban	Male	Catholic	Married (monogamous)	Informal agricultural	45-49	14			1609180	165920	0	281745	0	26840	0	0	0	0	45140	0	2128825	Matched (3)	0	0	6	Yes	Yes	10	Informal agricultural	Other Christian
4440	1	Mbuji-Mayi Cluster	999	Kasai-Orient	Township	Female	Child of the household head	Congolaise	Catholic	6	Yes	444001	44400104	4	4440	1	4	Kasaî Oriental	Urban	Male	Catholic	Married (polygamous)	Informal agricultural	65-69	7			2756812	175200	48000	815936	369200	0	0	0	8000	0	0	229360	4402508	Matched (3)	0	0	6	Yes	Yes	12	Informal agricultural	Catholic
5220	1	Pool de Kutu	4	Mai-Ndombe	Rural	Male	Chef de ménage	Congolaise	Other Christian	6	No	522001	52200101	1	5220	1	1	Bandundu	Rural	Male	Other Christian	Married (monogamous)	Public	25-29	4	56000		2756812	175200	48000	815936	369200	0	0	0	8000	0	0	229360	4402508	Matched (3)	0	0	6	No	No	29	Public	Other Christian
3453	1	Pool de Bas	2	Tshopo	Township	Female	Spouse of the household head	Congolaise	Catholic	6	No	345301	34530102	2	3453	1	2	Province Orientale	Urban	Male	Catholic	Married (monogamous)	Informal agricultural	45-49	8	56000		2756812	175200	48000	815936	369200	0	0	0	8000	0	0	229360	4402508	Matched (3)	0	0	6	No	No	33	Informal agricultural	Catholic
8150	1	Pool de Kolw	999	Lualaba	Rural	Male	Chef de ménage	Congolaise	Catholic	6	No	815001	81500101	1	8150	1	1	Katanga	Rural	Male	Catholic	Married (monogamous)	Informal non-agricultural	35-39	11			2756812	175200	48000	815936	369200	0	0	0	8000	0	0	229360	4402508	Matched (3)	0	0	6	No	No	39	Informal non-agricultural	Catholic
2570	1	Pool de Mwen	999	Lomami	Urban	Female	Spouse of the household head	Congolaise	Other religion	6	No	257001	25700102	2	2570	1	2	Kasaî Oriental	Urban	Male	Other religion	Married (polygamous)	Informal non-agricultural	40-44	9			2756812	175200	48000	815936	369200	0	0	0	8000	0	0	229360	4402508	Matched (3)	0	0	6	No	No	28	Informal non-agricultural	Other religion
840	1	Pool de Band	36	Kwilu	Urban	Female	Spouse of the household head	Congolaise	Protestant	6	No	84001	8400102	2	840	1	2	Bandundu	Urban	Male	Protestant	Married (monogamous)	Informal non-agricultural	40-44	5			2756812	175200	48000	815936	369200	0	0	0	8000	0	0	229360	4402508	Matched (3)	0	0	6	No	No	33	Informal non-agricultural	Protestant
6370	1	Pool de Lisa	2	Mongala	Rural	Male	Child of the household head	Congolaise	Other religion	6	Yes	637001	63700104	4	6370	1	4	Equateur	Rural	Male	Other religion	Married (monogamous)	Informal agricultural	35-39	5			5067271	0	133200	862097	42000	74074	389053	68741	91700	100400	229343	113700	7171580	Matched (3)	1.399971	1.399971	6	Yes	Yes	13	Informal agricultural	Other religion
3510	1	Pool de Bun	15	Ituri	Township	Female	Child of the household head	Congolaise	Catholic	6	Yes	351001	35100108	8	3510	1	8	Province Orientale	Urban	Male	Catholic	Married (monogamous)	Public	60-64	18			2756812	175200	48000	815936	369200	0	0	0	8000	0	0	229360	4402508	Matched (3)	0	0	6	Yes	Yes	16	Public	Catholic
7780	1	Pool de Buka	6	Sud-Kivu	Rural	Male	Child of the household head	Congolaise	Protestant	6	No	778001	77800104	4	7780	1	4	Sud-Kivu	Rural	Male	Protestant	Married (monogamous)	Informal agricultural	50-54	5			2756812	175200	48000	815936	369200	0	0	0	8000	0	0	229360	4402508	Matched (3)	0	0	6	No	No	19	Informal agricultural	Protestant
6560	1	Pool de Boen	1	Tshuapa	Rural	Male	Child of the household head	Congolaise	Other religion	6	Yes	656001	65600103	3	6560	1	3	Equateur	Rural	Male	Other religion	Married (monogamous)	Public	55-59	5			2756812	175200	48000	815936	369200	0	0	0	8000	0	0	229360	4402508	Matched (3)	0	0	6	Yes	Yes	17	Public	Other religion
9280	1	Pool de Mwen	999	Lomami	Rural	Male	Chef de ménage	Congolaise	Other religion	6	No	928001	92800101	1	9280	1	1	Kasaî Oriental	Rural	Male	Other religion	Married (monogamous)	Informal agricultural	50-54	4	7000		2756812	175200	48000	815936	369200	0	0	0	8000	0	0	229360	4402508	Matched (3)	0	0	6	No	No	54	Informal agricultural	Other religion
2690	1	Pool de Kana	999	Kasai-Centra	Urban	Male	Child of the household head	Congolaise	Other Christian	6	Yes	269001	26900104	4	2690	1	4	Kasaî occidental	Urban	Female	Other Christian	Widowed	Chomeurs	45-49	8	11517.83185		2756812	175200	48000	815936	369200	0	0	0	8000	0	0	229360	4402508	Matched (3)	0	0	6	Yes	Yes	18	Chomeurs	Other Christian
8830	1	Pool de Kase	999	Haut-Katanga	Rural	Female	Spouse of the household head	Congolaise	Protestant	6	No	883001	88300102	2	8830	1	2	Katanga	Rural	Male	Catholic	Married (polygamous)	Informal non-agricultural	25-29	5	21000		488976	2440	0	13927	12200	0	0	0	0	0	0	48800	566343	Matched (3)	0	0	6	No	No	26	Informal non-agricultural	Protestant
2090	1	Pool de Kolw	999	Lualaba	Urban	Male	Other parent	Congolaise	Catholic	6	No	209001	20900102	2	2090	1	2	Katanga	Urban	Female	Catholic	Widowed	Inactive	65-69	3	320000		2756812	175200	48000	815936	369200	0	0	0	8000	0	0	229360	4402508	Matched (3)	0	0	6	No	No	27	Inactive	Catholic
3310	1	Pool de Gbad	28	Nord-Ubangi	Township	Male	Chef de ménage	Congolaise	Protestant	6	Yes	331001	33100101	1	3310	1	1	Equateur	Urban	Male	Protestant	Single	Informal agricultural	25-29	4	25000		2756812	175200	48000	815936	369200	0	0	0	8000	0	0	229360	4402508	Matched (3)	0	0	6	Yes	Yes	27	Informal agricultural	Protestant
3560	1	Pool de Bun	10	Ituri	Township	Female	Other person	Congolaise	Catholic	6	No	356001	35600106	6	3560	1	6	Province Orientale	Urban	Male	Musulmane	Married (monogamous)	Informal non-agricultural	65-69	6	59000		2756812	175200	48000	815936	369200	0	0	0	8000	0	0	229360	4402508	Matched (3)	0	0	6	No	No	22	Informal non-agricultural	Catholic
9230	1	Pool de Lusa	999	Sankuru	Rural	Male	Child of the household head	Congolaise	Protestant	6	No	923001	92300103	3	9230	1	3	Kasaî Oriental	Rural	Male	Other Christian	Married (monogamous)	Informal agricultural	50-54	9	1000		2756812	175200	48000	815936	369200	0	0	0	8000	0	0	229360	4402508	Matched (3)	0	0	6	No	No	30	Informal agricultural	Protestant
1900	1	Pool de Buka	77	Sud-Kivu	Urban	Female	Spouse of the household head	Congolaise	Protestant	6	No	190001	19000102	2	1900	1	2	Sud-Kivu	Urban	Male	Protestant	Married (monogamous)	Informal non-agricultural	55-59	10			2756812	175200	48000	815936	369200	0	0	0	8000	0	0	229360	4402508	Matched (3)	0	0	6	No	No	49	Informal non-agricultural	Protestant
8990	1	Mbuji-Mayi Cluster	2	Kasai-Orient	Rural	Male	Child of the household head	Congolaise	Other Christian	6	Yes	899001	89900103	3	8990	1	3	Kasaî Oriental	Rural	Male	Other Christian	Married (monogamous)	Informal agricultural	65-69	7	7311.494168		714920	0	0	0	0	0	0	0	0	0	0	0	714920	Matched (3)	0	0	6	Yes	Yes	16	Informal agricultural	Other Christian
420	1	Kinshasa Cluster	19	Kinshasa	Urban	Female	Child of the household head	Congolaise	Catholic	6	Yes	42001	4200104	4	420	1	4	Kinshasa	Urban	Male	Catholic	Married (monogamous)	Public	50-54	9			2756812	175200	48000	815936	369200	0	0	0	8000	0	0	229360	4402508	Matched (3)	0	0	6	Yes	Yes	17	Public	Catholic
7340	1	Pool de Buta	2	Bas-Uele	Rural	Male	Child of the household head	Congolaise	Catholic	6	Yes	734001	73400103	3	7340	1	3	Province Orientale	Rural	Male	Catholic	Married (monogamous)	Informal agricultural	30-34	8			2756812	175200	48000	815936	369200	0	0	0	8000	0	0	229360	4402508	Matched (3)	0	0	6	Yes	Yes	13	Informal agricultural	Catholic
4510	1	Mbuji-Mayi Cluster	999	Kasai-Orient	Township	Female	Other parent	Congolaise	Catholic	6	No	451001	45100104	4	4510	1	4	Kasaî Oriental	Urban	Male	Catholic	Single	Public	20-24	5			2756812	175200	48000	815936	369200	0	0	0	8000	0	0	229360	4402508	Matched (3)	0	0	6	No	No	10	Public	Catholic
450	1	Kinshasa Cluster	34	Kinshasa	Urban	Male	Chef de ménage	Congolaise	Other Christian	6	No	45001	4500101	1	450	1	1	Kinshasa	Urban	Male	Other Christian	Married (monogamous)	Retired	55-59	4			2756812	175200	48000	815936	369200	0	0	0	8000	0	0	229360	4402508	Matched (3)	0	0	6	No	No	57	Retired	Other Christian
140	1	Kinshasa Cluster	2	Kinshasa	Urban	Female	Other person	Congolaise	Other Christian	6	No	14001	1400102	2	140	1	2	Kinshasa	Urban	Female	Other Christian	Widowed	Inactive	75-79	2			295312	0	0	0	9760	0	0	0	0	0	0	0	305072	Matched (3)	0	0	6	No	No	24	Inactive	Other Christian
1380	1	Kisangani Cluster	2	Tshopo	Urban	Male	Child of the household head	Congolaise	Protestant	6	Yes	138001	13800105	5	1380	1	5	Province Orientale	Urban	Male	Protestant	Married (monogamous)	Informal agricultural	30-34	11			2756812	175200	48000	815936	369200	0	0	0	8000	0	0	229360	4402508	Matched (3)	0	0	6	Yes	Yes	6	Informal agricultural	Protestant
9450	1	Pool de Mwen	999	Lomami	Rural	Male	Child of the household head	Congolaise	Catholic	6	Yes	945001	94500108	8	9450	1	8	Kasaî Oriental	Rural	Male	Catholic	Married (polygamous)	Informal agricultural	55-59	9			2756812	175200	48000	815936	369200	0	0	0	8000	0	0	229360	4402508	Matched (3)	0	0	6	Yes	Yes	10	Informal agricultural	Catholic
1400	1	Kisangani Cluster	2	Tshopo	Urban	Female	Spouse of the household head	Congolaise	Other Christian	6	No	140001	14000102	2	1400	1	2	Province Orientale	Urban	Male	Other Christian	Married (monogamous)	Inactive	25-29	7			1926460	0	12000	82247	56120	54520	0	0	13420	0	0	152500	2297267	Matched (3)	0	0	6	No	No	23	Inactive	Other Christian
9140	1	Pool de Lodj	3	Sankuru	Rural	Male	Child of the household head	Congolaise	Kimbanguist	6	Yes	914001	91400102	2	9140	1	2	Kasaî Oriental	Rural	Female	Kimbanguist	Widowed	Informal agricultural	50-54	5			2756812	175200	48000	815936	369200	0	0	0	8000	0	0	229360	4402508	Matched (3)	0	0	6	Yes	Yes	8	Informal agricultural	Kimbanguist
9220	1	Pool de Lodj	6	Sankuru	Rural	Male	Child of the household head	Congolaise	Catholic	6	Yes	922001	92200107	7	9220	1	7	Kasaî Oriental	Rural	Male	Catholic	Married (monogamous)	Public	65-69	10			2756812	175200	48000	815936	369200	0	0	0	8000	0	0	229360	4402508	Matched (3)	0	0	6	Yes	Yes	16	Public	Catholic
2740	1	Pool de Tshi	999	Kasai	Urban	Male	Other parent	Congolaise	Other Christian	6	Yes	274001	27400103	3	2740	1	3	Kasaî occidental	Urban	Male	Other Christian	Married (monogamous)	Informal non-agricultural	40-44	6			2756812	175200	48000	815936	369200	0	0	0	8000	0	0	229360	4402508	Matched (3)	0	0	6	Yes	Yes	20	Informal non-agricultural	Other Christian
6850	1	Pool de Bas	3	Tshopo	Rural	Male	Child of the household head	Congolaise	Other religion	6	Yes	685001	68500104	4	6850	1	4	Province Orientale	Rural	Male	Other religion	Married (monogamous)	Informal agricultural	35-39	11			2756812	175200	48000	815936	369200	0	0	0	8000	0	0	229360	4402508	Matched (3)	0	0	6	Yes	Yes	13	Informal agricultural	Other religion
1410	1	Kisangani Cluster	22	Tshopo	Urban	Female	Child of the household head	Congolaise	Other Christian	6	Yes	141001	14100106	6	1410	1	6	Province Orientale	Urban	Male	Other Christian	Married (monogamous)	Informal non-agricultural	45-49	12			524440	0	9700	80600	5000	4400	0	0	1600	750	0	50000	676490	Matched (3)	.1108664	.1108664	6	Yes	Yes	9	Informal non-agricultural	Other Christian
860	1	Pool de Band	23	Kwilu	Urban	Female	Spouse of the household head	Congolaise	Catholic	6	No	86001	8600102	2	860	1	2	Bandundu	Urban	Male	Catholic	Married (monogamous)	Informal non-agricultural	75-79	6	50000		2756812	175200	48000	815936	369200	0	0	0	8000	0	0	229360	4402508	Matched (3)	0	0	6	No	No	49	Informal non-agricultural	Catholic
160	1	Kinshasa Cluster	13	Kinshasa	Urban	Female	Child of the household head	Congolaise	Catholic	6	No	16001	1600105	5	160	1	5	Kinshasa	Urban	Male	Catholic	Married (monogamous)	Inactive	70-74	5	48430.55222		2756812	175200	48000	815936	369200	0	0	0	8000	0	0	229360	4402508	Matched (3)	0	0	6	No	No	29	Inactive	Catholic
4830	1	Pool de Mwek	29	Kasai	Township	Male	Chef de ménage	Congolaise	Catholic	6	No	483001	48300101	1	4830	1	1	Kasaî occidental	Urban	Male	Catholic	Married (monogamous)	Informal non-agricultural	35-39	10	12000	15000	2756812	175200	48000	815936	369200	0	0	0	8000	0	0	229360	4402508	Matched (3)	0	0	6	No	No	39	Informal non-agricultural	Catholic
3190	1	Pool de Basa	999	Equateur	Township	Female	Child of the household head	Congolaise	Other Christian	6	Yes	319001	31900105	5	3190	1	5	Equateur	Urban	Male	Other Christian	Married (monogamous)	Informal agricultural	35-39	10			2756812	175200	48000	815936	369200	0	0	0	8000	0	0	229360	4402508	Matched (3)	0	0	6	Yes	Yes	13	Informal agricultural	Other Christian
2180	1	Pool de Lika	999	Haut-Katanga	Urban	Female	Spouse of the household head	Congolaise	Other Christian	6	No	218001	21800102	2	2180	1	2	Katanga	Urban	Male	Other Christian	Married (monogamous)	Informal non-agricultural	25-29	4			1239520	0	0	143960	21960	4880	0	0	0	0	0	61000	1471320	Matched (3)	0	0	6	No	No	25	Informal non-agricultural	Other Christian
8970	1	Mbuji-Mayi Cluster	999	Kasai-Orient	Rural	Female	Spouse of the household head	Congolaise	Protestant	6	No	897001	89700102	2	8970	1	2	Kasaî Oriental	Rural	Male	Protestant	Married (polygamous)	Informal agricultural	30-34	7	8221.011649		2756812	175200	48000	815936	369200	0	0	0	8000	0	0	229360	4402508	Matched (3)	0	0	6	No	No	26	Informal agricultural	Protestant
4480	1	Mbuji-Mayi Cluster	2	Kasai-Orient	Township	Male	Child of the household head	Congolaise	Catholic	6	No	448001	44800102	2	4480	1	2	Kasaî Oriental	Urban	Female	Catholic	Widowed	Informal agricultural	60-64	7	20000		2756812	175200	48000	815936	369200	0	0	0	8000	0	0	229360	4402508	Matched (3)	0	0	6	No	No	46	Informal agricultural	Catholic
3453	1	Pool de Bas	2	Tshopo	Township	Male	Child of the household head	Congolaise	Catholic	6	Yes	345301	34530104	4	3453	1	4	Province Orientale	Urban	Male	Catholic	Married (monogamous)	Informal agricultural	45-49	8	45659.4321		2756812	175200	48000	815936	369200	0	0	0	8000	0	0	229360	4402508	Matched (3)	0	0	6	Yes	Yes	19	Informal agricultural	Catholic
420	1	Kinshasa Cluster	19	Kinshasa	Urban	Male	Chef de ménage	Congolaise	Catholic	6	No	42001	4200101	1	420	1	1	Kinshasa	Urban	Male	Catholic	Married (monogamous)	Public	50-54	9	201000		2756812	175200	48000	815936	369200	0	0	0	8000	0	0	229360	4402508	Matched (3)	0	0	6	No	No	51	Public	Catholic
3510	1	Pool de Bun	15	Ituri	Township	Female	Spouse of the household head	Congolaise	Catholic	6	No	351001	35100102	2	3510	1	2	Province Orientale	Urban	Male	Catholic	Married (monogamous)	Public	60-64	18			2756812	175200	48000	815936	369200	0	0	0	8000	0	0	229360	4402508	Matched (3)	0	0	6	No	No	54	Public	Catholic
4210	1	Pool de Kale	999	Tanganyka	Township	Female	Spouse of the household head	Congolaise	Other Christian	6	No	421001	42100102	2	4210	1	2	Katanga	Urban	Male	Other Christian	Married (monogamous)	Public	35-39	6			2756812	175200	48000	815936	369200	0	0	0	8000	0	0	229360	4402508	Matched (3)	0	0	6	No	No	35	Public	Other Christian
8140	1	Pool de Kasa	999	Lualaba	Rural	Female	Child of the household head	Congolaise	Other Christian	6	Yes	814001	81400105	5	8140	1	5	Katanga	Rural	Male	Other Christian	Married (monogamous)	Public	45-49	6			2756812	175200	48000	815936	369200	0	0	0	8000	0	0	229360	4402508	Matched (3)	0	0	6	Yes	Yes	17	Public	Other Christian
8150	1	Pool de Kolw	999	Lualaba	Rural	Male	Child of the household head	Congolaise	Catholic	6	Yes	815001	81500105	5	8150	1	5	Katanga	Rural	Male	Catholic	Married (monogamous)	Informal non-agricultural	35-39	11			1316380	0	12200	804765	0	0	409920	517280	141520	0	42700	222040	3466805	Matched (3)	0	0	6	Yes	Yes	12	Informal non-agricultural	Catholic
9620	1	Pool de Kana	999	Kasai-Centra	Rural	Male	Other parent	Congolaise	Other Christian	6	Yes	962001	96200109	9	9620	1	9	Kasaî occidental	Rural	Male	Other Christian	Married (monogamous)	Informal agricultural	45-49	10	8292.191972		2756812	175200	48000	815936	369200	0	0	0	8000	0	0	229360	4402508	Matched (3)	0	0	6	Yes	Yes	15	Informal agricultural	Other Christian
8720	1	Pool de Lika	999	Haut-Katanga	Rural	Female	Chef de ménage	Congolaise	Protestant	6	No	872001	87200101	1	8720	1	1	Katanga	Rural	Female	Protestant	Divorced	Informal non-agricultural	30-34	8	60000		2756812	175200	48000	815936	369200	0	0	0	8000	0	0	229360	4402508	Matched (3)	0	0	6	No	No	33	Informal non-agricultural	Protestant
7720	1	Pool de Buka	999	Sud-Kivu	Rural	Female	Child of the household head	Congolaise	Protestant	6	No	772001	77200104	4	7720	1	4	Sud-Kivu	Rural	Male	Catholic	Married (monogamous)	Public	55-59	6			2756812	175200	48000	815936	369200	0	0	0	8000	0	0	229360	4402508	Matched (3)	0	0	6	No	No	16	Public	Protestant
1900	1	Pool de Buka	77	Sud-Kivu	Urban	Male	Other parent	Congolaise	Protestant	6	Yes	190001	19000109	9	1900	1	9	Sud-Kivu	Urban	Male	Protestant	Married (monogamous)	Informal non-agricultural	55-59	10			2756812	175200	48000	815936	369200	0	0	0	8000	0	0	229360	4402508	Matched (3)	0	0	6	Yes	Yes	8	Informal non-agricultural	Protestant
410	1	Kinshasa Cluster	25	Kinshasa	Urban	Male	Chef de ménage	Congolaise	Catholic	6	No	41001	4100101	1	410	1	1	Kinshasa	Urban	Male	Catholic	Married (monogamous)	Public	40-44	4	80000	51852.23038	2756812	175200	48000	815936	369200	0	0	0	8000	0	0	229360	4402508	Matched (3)	0	0	6	No	No	42	Public	Catholic
3320	1	Pool de Gbad	38	Nord-Ubangi	Township	Female	Child of the household head	Congolaise	Protestant	6	Yes	332001	33200104	4	3320	1	4	Equateur	Urban	Male	Protestant	Married (monogamous)	Informal non-agricultural	30-34	6			2756812	175200	48000	815936	369200	0	0	0	8000	0	0	229360	4402508	Matched (3)	0	0	6	Yes	Yes	9	Informal non-agricultural	Protestant
8010	1	Pool de Kibo	1	Maniema	Rural	Male	Child of the household head	Congolaise	Protestant	6	Yes	801001	80100108	8	8010	1	8	Maniema	Rural	Male	Protestant	Married (polygamous)	Informal agricultural	60-64	11			2756812	175200	48000	815936	369200	0	0	0	8000	0	0	229360	4402508	Matched (3)	0	0	6	Yes	Yes	6	Informal agricultural	Protestant
3520	1	Pool de Bun	15	Ituri	Township	Female	Child of the household head	Congolaise	Catholic	6	Yes	352001	35200103	3	3520	1	3	Province Orientale	Urban	Male	Catholic	Married (polygamous)	Inactive	40-44	6			2756812	175200	48000	815936	369200	0	0	0	8000	0	0	229360	4402508	Matched (3)	0	0	6	Yes	Yes	11	Inactive	Catholic
650	1	Pool de Boma	89	Kongo Centra	Urban	Female	Spouse of the household head	Congolaise	Protestant	6	No	65001	6500102	2	650	1	2	Bas-Congo	Urban	Male	Protestant	Married (monogamous)	Informal non-agricultural	35-39	4			2756812	175200	48000	815936	369200	0	0	0	8000	0	0	229360	4402508	Matched (3)	0	0	6	No	No	27	Informal non-agricultural	Protestant
710	1	Pool de Mata	214	Kongo Centra	Urban	Female	Child of the household head	Congolaise	Other Christian	6	Yes	71001	7100105	5	710	1	5	Bas-Congo	Urban	Male	Catholic	Married (monogamous)	Public	55-59	10			777380	0	24000	160462	24000	5000	0	0	0	24000	7320	0	1022162	Matched (3)	2.347964	2.347964	6	Yes	Yes	16	Public	Other Christian
3270	1	Pool de Geme	15	Sud-Ubangi	Township	Male	Child of the household head	Congolaise	Catholic	6	Yes	327001	32700104	4	3270	1	4	Equateur	Urban	Female	Catholic	Divorced	Informal non-agricultural	45-49	10	1000		2756812	175200	48000	815936	369200	0	0	0	8000	0	0	229360	4402508	Matched (3)	0	0	6	Yes	Yes	19	Informal non-agricultural	Catholic
7740	1	Pool de Buka	52	Sud-Kivu	Rural	Female	Spouse of the household head	Congolaise	Other religion	6	No	774001	77400102	2	7740	1	2	Sud-Kivu	Rural	Male	Other religion	Married (monogamous)	Informal non-agricultural	40-44	10	100000		702200	0	0	0	39000	0	0	15600	0	0	0	0	756800	Matched (3)	0	0	6	No	No	34	Informal non-agricultural	Other religion
2460	1	Mbuji-Mayi Cluster	999	Kasai-Orient	Urban	Male	Child of the household head	Congolaise	Other religion	6	Yes	246001	24600104	4	2460	1	4	Kasaî Oriental	Urban	Male	Other religion	Married (monogamous)	Public	45-49	8			1119120	0	202000	67932	62000	167000	600000	0	120800	21600	0	9760	2370212	Matched (3)	.911311	.911311	6	Yes	Yes	19	Public	Other religion
3830	1	Pool de Beni	2	Nord-Kivu	Township	Male	Child of the household head	Congolaise	Protestant	6	No	383001	38300105	5	3830	1	5	Nord-Kivu	Urban	Male	Protestant	Married (monogamous)	Informal agricultural	55-59	7			2756812	175200	48000	815936	369200	0	0	0	8000	0	0	229360	4402508	Matched (3)	0	0	6	No	No	18	Informal agricultural	Protestant
1070	1	Pool de Mban	10	Equateur	Urban	Female	Child of the household head	Congolaise	Catholic	6	Yes	107001	10700103	3	1070	1	3	Equateur	Urban	Female	Other religion	Divorced	Informal non-agricultural	35-39	7			2756812	175200	48000	815936	369200	0	0	0	8000	0	0	229360	4402508	Matched (3)	0	0	6	Yes	Yes	11	Informal non-agricultural	Catholic
8100	1	Pool de Kasa	999	Lualaba	Rural	Male	Chef de ménage	Congolaise	Protestant	6	No	810001	81000101	1	8100	1	1	Katanga	Rural	Male	Protestant	Married (monogamous)	Informal agricultural	40-44	6	14785.38645		2756812	175200	48000	815936	369200	0	0	0	8000	0	0	229360	4402508	Matched (3)	0	0	6	No	No	41	Informal agricultural	Protestant
3430	1	Pool de Bas	2	Tshopo	Township	Male	Child of the household head	Congolaise	Catholic	6	Yes	343001	34300105	5	3430	1	5	Province Orientale	Urban	Male	Catholic	Married (monogamous)	Informal agricultural	55-59	7			2756812	175200	48000	815936	369200	0	0	0	8000	0	0	229360	4402508	Matched (3)	0	0	6	Yes	Yes	9	Informal agricultural	Catholic
910	1	Pool de Kikw	4	Kwilu	Urban	Male	Child of the household head	Congolaise	Protestant	6	Yes	91001	9100108	8	910	1	8	Bandundu	Urban	Female	Protestant	Single	Informal non-agricultural	35-39	6			2756812	175200	48000	815936	369200	0	0	0	8000	0	0	229360	4402508	Matched (3)	0	0	6	Yes	Yes	7	Informal non-agricultural	Protestant
3614	1	Isiro Cluster	7	Haut-Uele	Township	Male	Chef de ménage	Congolaise	Catholic	6	No	361401	36140101	1	3614	1	1	Province Orientale	Urban	Male	Catholic	Married (monogamous)	Informal agricultural	45-49	2	35000		2756812	175200	48000	815936	369200	0	0	0	8000	0	0	229360	4402508	Matched (3)	0	0	6	No	No	46	Informal agricultural	Catholic
2490	1	Pool de Mwen	999	Lomami	Urban	Male	Chef de ménage	Congolaise	Other Christian	6	No	249001	24900101	1	2490	1	1	Kasaî Oriental	Urban	Male	Other Christian	Married (monogamous)	Public	55-59	6	40000		219600	26143	0	0	10457	10457	0	0	0	0	0	0	266657	Matched (3)	0	0	6	No	No	59	Public	Other Christian
4390	1	Pool de Lubu	999	Haut-Katanga	Township	Male	Chef de ménage	Congolaise	Catholic	6	No	439001	43900101	1	4390	1	1	Katanga	Urban	Male	Catholic	Married (monogamous)	Retired	55-59	11			1371768	0	0	73344	15860	0	0	43920	0	0	14640	0	1519532	Matched (3)	0	0	6	No	No	58	Retired	Catholic
2100	1	Pool de Kolw	999	Lualaba	Urban	Female	Child of the household head	Congolaise	Other Christian	6	Yes	210001	21000108	8	2100	1	8	Katanga	Urban	Male	Other Christian	Married (monogamous)	Formal private sector	55-59	8			983625	1525	0	549603	27450	0	0	0	0	0	0	0	1562203	Matched (3)	0	0	6	Yes	Yes	11	Formal private sector	Other Christian
9640	1	Pool de Kana	999	Kasai-Centra	Rural	Female	Child of the household head	Congolaise	Other Christian	6	No	964001	96400103	3	9640	1	3	Kasaî occidental	Rural	Female	Other Christian	Widowed	Informal agricultural	55-59	6	7100.481403		233020	0	0	111736	27982	0	0	0	3000	3000	0	1000	379738	Matched (3)	.7900178	.7900178	6	No	No	19	Informal agricultural	Other Christian
9710	1	Pool de Mwek	2	Kasai	Rural	Female	Spouse of the household head	Congolaise	Other Christian	6	No	971001	97100102	2	9710	1	2	Kasaî occidental	Rural	Male	Other Christian	Married (monogamous)	Informal agricultural	55-59	8	7000		2756812	175200	48000	815936	369200	0	0	0	8000	0	0	229360	4402508	Matched (3)	0	0	6	No	No	42	Informal agricultural	Other Christian
990	1	Pool de Kikw	6	Kwilu	Urban	Male	Other parent	Congolaise	Catholic	6	No	99001	9900102	2	990	1	2	Bandundu	Urban	Male	Catholic	Single	Public	30-34	3			2756812	175200	48000	815936	369200	0	0	0	8000	0	0	229360	4402508	Matched (3)	0	0	6	No	No	36	Public	Catholic
3530	1	Pool de Bun	5	Ituri	Township	Female	Child of the household head	Congolaise	Catholic	6	No	353001	35300104	4	3530	1	4	Province Orientale	Urban	Male	Catholic	Married (monogamous)	Formal private sector	65-69	10	10000		678840	26000	733600	14440	33064	23333	5000	0	69500	71500	4880	113120	1773277	Matched (3)	4.032083	4.032083	6	No	No	20	Formal private sector	Catholic
6670	1	Pool de Bas	2	Tshopo	Rural	Female	Spouse of the household head	Congolaise	Other religion	6	No	667001	66700102	2	6670	1	2	Province Orientale	Rural	Male	Other religion	Married (monogamous)	Informal agricultural	40-44	5	8000		1507432	0	0	98820	8540	0	0	0	0	0	29280	12200	1656272	Matched (3)	0	0	6	No	No	34	Informal agricultural	Other religion
7240	1	Isiro Cluster	1	Haut-Uele	Rural	Male	Child of the household head	Congolaise	Catholic	6	Yes	724001	72400105	5	7240	1	5	Province Orientale	Rural	Male	Catholic	Married (monogamous)	Informal agricultural	65-69	10			2756812	175200	48000	815936	369200	0	0	0	8000	0	0	229360	4402508	Matched (3)	0	0	6	Yes	Yes	16	Informal agricultural	Catholic
3453	1	Pool de Bas	2	Tshopo	Township	Male	Child of the household head	Congolaise	Catholic	6	Yes	345301	34530103	3	3453	1	3	Province Orientale	Urban	Male	Catholic	Married (monogamous)	Informal agricultural	45-49	8	47911.20844		2756812	175200	48000	815936	369200	0	0	0	8000	0	0	229360	4402508	Matched (3)	0	0	6	Yes	Yes	22	Informal agricultural	Catholic
90	1	Kinshasa Cluster	22	Kinshasa	Urban	Male	Chef de ménage	Congolaise	Catholic	6	No	9001	900101	1	90	1	1	Kinshasa	Urban	Male	Catholic	Married (monogamous)	Formal private sector	50-54	8	80000		2756812	175200	48000	815936	369200	0	0	0	8000	0	0	229360	4402508	Matched (3)	0	0	6	No	No	54	Formal private sector	Catholic
9380	1	Pool de Mwen	999	Lomami	Rural	Male	Child of the household head	Congolaise	Other Christian	6	Yes	938001	93800103	3	9380	1	3	Kasaî Oriental	Rural	Male	Other Christian	Married (monogamous)	Informal agricultural	50-54	5			2756812	175200	48000	815936	369200	0	0	0	8000	0	0	229360	4402508	Matched (3)	0	0	6	Yes	Yes	19	Informal agricultural	Other Christian
2680	1	Pool de Kana	999	Kasai-Centra	Urban	Female	Child of the household head	Congolaise	Catholic	6	Yes	268001	26800103	3	2680	1	3	Kasaî occidental	Urban	Male	Catholic	Married (monogamous)	Informal non-agricultural	40-44	6			2756812	175200	48000	815936	369200	0	0	0	8000	0	0	229360	4402508	Matched (3)	0	0	6	Yes	Yes	13	Informal non-agricultural	Catholic
3070	1	Pool de Idio	44	Kwilu	Township	Female	Spouse of the household head	Congolaise	Other religion	6	No	307001	30700102	2	3070	1	2	Bandundu	Urban	Male	Other religion	Married (monogamous)	Inactive	50-54	2	45000		2756812	175200	48000	815936	369200	0	0	0	8000	0	0	229360	4402508	Matched (3)	0	0	6	No	No	42	Inactive	Other religion
340	1	Kinshasa Cluster	4	Kinshasa	Urban	Female	Other parent	Congolaise	Other Christian	6	No	34001	3400103	3	340	1	3	Kinshasa	Urban	Male	Other Christian	Married (monogamous)	Informal non-agricultural	50-54	7	180000		2756812	175200	48000	815936	369200	0	0	0	8000	0	0	229360	4402508	Matched (3)	0	0	6	No	No	56	Informal non-agricultural	Other Christian
3170	1	Pool de Keng	18	Kwango	Township	Male	Child of the household head	Congolaise	Catholic	6	Yes	317001	31700104	4	3170	1	4	Bandundu	Urban	Male	Catholic	Married (monogamous)	Public	55-59	9			2756812	175200	48000	815936	369200	0	0	0	8000	0	0	229360	4402508	Matched (3)	0	0	6	Yes	Yes	22	Public	Catholic
570	1	Pool de Boma	51	Kongo Centra	Urban	Male	Chef de ménage	Congolaise	Other Christian	6	No	57001	5700101	1	570	1	1	Bas-Congo	Urban	Male	Other Christian	Married (monogamous)	Informal non-agricultural	55-59	7	100000		2756812	175200	48000	815936	369200	0	0	0	8000	0	0	229360	4402508	Matched (3)	0	0	6	No	No	56	Informal non-agricultural	Other Christian
3290	1	Pool de Geme	34	Sud-Ubangi	Township	Male	Chef de ménage	Congolaise	Protestant	6	No	329001	32900101	1	3290	1	1	Equateur	Urban	Male	Protestant	Married (monogamous)	Public	35-39	5	276000		2756812	175200	48000	815936	369200	0	0	0	8000	0	0	229360	4402508	Matched (3)	0	0	6	No	No	35	Public	Protestant
1230	1	Pool de Gbad	2	Nord-Ubangi	Urban	Female	Spouse of the household head	Congolaise	Other religion	6	No	123001	12300102	2	1230	1	2	Equateur	Urban	Male	Kimbanguist	Married (polygamous)	Public	40-44	6	15000		2756812	175200	48000	815936	369200	0	0	0	8000	0	0	229360	4402508	Matched (3)	0	0	6	No	No	29	Public	Other religion
7760	1	Pool de Buka	12	Sud-Kivu	Rural	Female	Child of the household head	Congolaise	Protestant	6	Yes	776001	77600105	5	7760	1	5	Sud-Kivu	Rural	Male	Catholic	Married (monogamous)	Informal agricultural	40-44	7			806420	6100	27220	380421	15950	32680	56000	0	84500	130000	12000	58540	1609832	Matched (3)	8.075378	8.075378	6	Yes	Yes	10	Informal agricultural	Protestant
3010	1	Pool de Band	7	Kwilu	Township	Female	Child of the household head	Congolaise	Other religion	6	Yes	301001	30100106	6	3010	1	6	Bandundu	Urban	Male	Other religion	Married (monogamous)	Public	45-49	8			2756812	175200	48000	815936	369200	0	0	0	8000	0	0	229360	4402508	Matched (3)	0	0	6	Yes	Yes	11	Public	Other religion
3412	1	Pool de Boku	9	Tshuapa	Township	Female	Child of the household head	Congolaise	Other Christian	6	Yes	341201	34120104	4	3412	1	4	Equateur	Urban	Male	Other Christian	Married (polygamous)	Informal non-agricultural	40-44	5	5400		2756812	175200	48000	815936	369200	0	0	0	8000	0	0	229360	4402508	Matched (3)	0	0	6	Yes	Yes	13	Informal non-agricultural	Other Christian
3840	1	Pool de Beni	2	Nord-Kivu	Township	Male	Child of the household head	Congolaise	Catholic	6	Yes	384001	38400103	3	3840	1	3	Nord-Kivu	Urban	Male	Catholic	Married (monogamous)	Informal non-agricultural	30-34	6			2756812	175200	48000	815936	369200	0	0	0	8000	0	0	229360	4402508	Matched (3)	0	0	6	Yes	Yes	10	Informal non-agricultural	Catholic
8030	1	Pool de Pun	1	Maniema	Rural	Female	Child of the household head	Congolaise	Protestant	6	No	803001	80300106	6	8030	1	6	Maniema	Rural	Male	Protestant	Married (monogamous)	Informal agricultural	65-69	15			507276	0	43000	0	10894	14780	0	0	21100	15900	0	22800	635750	Matched (3)	2.500983	2.500983	6	No	No	30	Informal agricultural	Protestant
8680	1	Pool de Lika	999	Haut-Katanga	Rural	Female	Child of the household head	Congolaise	Other Christian	6	Yes	868001	86800104	4	8680	1	4	Katanga	Rural	Male	Other Christian	Married (monogamous)	Informal agricultural	55-59	6			1500300	13800	0	255616	18200	0	0	0	0	0	13000	0	1800916	Matched (3)	0	0	6	Yes	Yes	16	Informal agricultural	Other Christian
4320	1	Pool de Kase	999	Haut-Katanga	Township	Male	Chef de ménage	Congolaise	Other Christian	6	No	432001	43200101	1	4320	1	1	Katanga	Urban	Male	Other Christian	Married (monogamous)	Informal agricultural	40-44	9	180000		2756812	175200	48000	815936	369200	0	0	0	8000	0	0	229360	4402508	Matched (3)	0	0	6	No	No	40	Informal agricultural	Other Christian
2840	1	Pool de Tshi	999	Kasai	Urban	Female	Chef de ménage	Congolaise	Protestant	6	No	284001	28400101	1	2840	1	1	Kasaî occidental	Urban	Female	Protestant	Widowed	Public	35-39	5	50000		2756812	175200	48000	815936	369200	0	0	0	8000	0	0	229360	4402508	Matched (3)	0	0	6	No	No	38	Public	Protestant
6970	1	Pool de Bun	2	Ituri	Rural	Male	Child of the household head	Congolaise	Catholic	6	Yes	697001	69700104	4	6970	1	4	Province Orientale	Rural	Male	Catholic	Married (polygamous)	Informal agricultural	55-59	11			436516	0	0	0	1464	0	0	0	0	0	0	2440	440420	Matched (3)	0	0	6	Yes	Yes	14	Informal agricultural	Catholic
1340	1	Kisangani Cluster	9	Tshopo	Urban	Male	Child of the household head	Congolaise	Catholic	6	Yes	134001	13400103	3	1340	1	3	Province Orientale	Urban	Male	Catholic	Married (monogamous)	Public	55-59	4			2756812	175200	48000	815936	369200	0	0	0	8000	0	0	229360	4402508	Matched (3)	0	0	6	Yes	Yes	16	Public	Catholic
3650	1	Isiro Cluster	41	Haut-Uele	Township	Male	Child of the household head	Congolaise	Catholic	6	Yes	365001	36500104	4	3650	1	4	Province Orientale	Urban	Male	Other religion	Married (monogamous)	Informal non-agricultural	50-54	6			2756812	175200	48000	815936	369200	0	0	0	8000	0	0	229360	4402508	Matched (3)	0	0	6	Yes	Yes	10	Informal non-agricultural	Catholic
3290	1	Pool de Geme	34	Sud-Ubangi	Township	Female	Spouse of the household head	Congolaise	Protestant	6	No	329001	32900102	2	3290	1	2	Equateur	Urban	Male	Protestant	Married (monogamous)	Public	35-39	5	46413.61284		2756812	175200	48000	815936	369200	0	0	0	8000	0	0	229360	4402508	Matched (3)	0	0	6	No	No	33	Public	Protestant
960	1	Pool de Kikw	1	Kwilu	Urban	Male	Other parent	Congolaise	Other Christian	6	Yes	96001	9600103	3	960	1	3	Bandundu	Urban	Male	Protestant	Married (monogamous)	Informal non-agricultural	35-39	8			2756812	175200	48000	815936	369200	0	0	0	8000	0	0	229360	4402508	Matched (3)	0	0	6	Yes	Yes	27	Informal non-agricultural	Other Christian
3612	1	Isiro Cluster	3	Haut-Uele	Township	Male	Chef de ménage	Congolaise	Catholic	6	No	361201	36120101	1	3612	1	1	Province Orientale	Urban	Male	Catholic	Married (monogamous)	Public	65-69	4	30000		2756812	175200	48000	815936	369200	0	0	0	8000	0	0	229360	4402508	Matched (3)	0	0	6	No	No	67	Public	Catholic
6840	1	Pool de Bas	3	Tshopo	Rural	Female	Spouse of the household head	Congolaise	Protestant	6	No	684001	68400102	2	6840	1	2	Province Orientale	Rural	Male	Protestant	Married (monogamous)	Informal agricultural	30-34	7	10522.20761		1162620	19520	134000	311560	95940	81000	126000	0	80000	147500	60200	246000	2464340	Matched (3)	5.985375	5.985375	6	No	No	25	Informal agricultural	Protestant
1740	1	Pool de Goma	15	Nord-Kivu	Urban	Female	Spouse of the household head	Congolaise	Other Christian	6	No	174001	17400102	2	1740	1	2	Nord-Kivu	Urban	Male	Other Christian	Married (monogamous)	Informal non-agricultural	40-44	4	0		2756812	175200	48000	815936	369200	0	0	0	8000	0	0	229360	4402508	Matched (3)	0	0	6	No	No	35	Informal non-agricultural	Other Christian
1120	1	Pool de Mban	3	Equateur	Urban	Female	Other parent	Congolaise	Catholic	6	Yes	112001	11200104	4	1120	1	4	Equateur	Urban	Male	Catholic	Married (monogamous)	Informal non-agricultural	35-39	4			2756812	175200	48000	815936	369200	0	0	0	8000	0	0	229360	4402508	Matched (3)	0	0	6	Yes	Yes	15	Informal non-agricultural	Catholic
8520	1	Pool de Mano	999	Tanganyka	Rural	Female	Child of the household head	Congolaise	Catholic	6	No	852001	85200108	8	8520	1	8	Katanga	Rural	Male	Catholic	Married (monogamous)	Informal agricultural	35-39	8			2756812	175200	48000	815936	369200	0	0	0	8000	0	0	229360	4402508	Matched (3)	0	0	6	No	No	6	Informal agricultural	Catholic
9590	1	Pool de Kana	999	Kasai-Centra	Rural	Female	Child of the household head	Congolaise	Catholic	6	Yes	959001	95900105	5	9590	1	5	Kasaî occidental	Rural	Male	Catholic	Married (polygamous)	Informal agricultural	55-59	9			2756812	175200	48000	815936	369200	0	0	0	8000	0	0	229360	4402508	Matched (3)	0	0	6	Yes	Yes	13	Informal agricultural	Catholic
2340	1	Pool de Lubu	999	Haut-Katanga	Urban	Female	Chef de ménage	Congolaise	Other Christian	6	No	234001	23400101	1	2340	1	1	Katanga	Urban	Female	Other Christian	Widowed	Informal non-agricultural	35-39	4	87200		2756812	175200	48000	815936	369200	0	0	0	8000	0	0	229360	4402508	Matched (3)	0	0	6	No	No	35	Informal non-agricultural	Other Christian
220	1	Kinshasa Cluster	6	Kinshasa	Urban	Male	Chef de ménage	Congolaise	Other Christian	6	No	22001	2200101	1	220	1	1	Kinshasa	Urban	Male	Other Christian	Married (monogamous)	Informal non-agricultural	25-29	3	97880.82272		2756812	175200	48000	815936	369200	0	0	0	8000	0	0	229360	4402508	Matched (3)	0	0	6	No	No	29	Informal non-agricultural	Other Christian
2930	1	Pool de INo	48	Mai-Ndombe	Township	Male	Chef de ménage	Congolaise	Other religion	6	No	293001	29300101	1	2930	1	1	Bandundu	Urban	Male	Other religion	Married (monogamous)	Public	40-44	9	70000		2756812	175200	48000	815936	369200	0	0	0	8000	0	0	229360	4402508	Matched (3)	0	0	6	No	No	44	Public	Other religion
6970	1	Pool de Bun	2	Ituri	Rural	Male	Child of the household head	Congolaise	Catholic	6	No	697001	69700103	3	6970	1	3	Province Orientale	Rural	Male	Catholic	Married (polygamous)	Informal agricultural	55-59	11			2756812	175200	48000	815936	369200	0	0	0	8000	0	0	229360	4402508	Matched (3)	0	0	6	No	No	19	Informal agricultural	Catholic
9170	1	Pool de Lodj	1	Sankuru	Rural	Female	Child of the household head	Congolaise	Other Christian	6	Yes	917001	91700102	2	9170	1	2	Kasaî Oriental	Rural	Male	Other Christian	Widowed	Informal agricultural	45-49	4	4428.583593		2756812	175200	48000	815936	369200	0	0	0	8000	0	0	229360	4402508	Matched (3)	0	0	6	Yes	Yes	12	Informal agricultural	Other Christian
3950	1	Pool de Uvir	24	Sud-Kivu	Township	Male	Child of the household head	Congolaise	Other Christian	6	Yes	395001	39500103	3	3950	1	3	Sud-Kivu	Urban	Male	Other Christian	Married (monogamous)	Chomeurs	55-59	5	117000		2756812	175200	48000	815936	369200	0	0	0	8000	0	0	229360	4402508	Matched (3)	0	0	6	Yes	Yes	17	Chomeurs	Other Christian
8030	1	Pool de Pun	1	Maniema	Rural	Male	Child of the household head	Congolaise	Protestant	6	No	803001	80300104	4	8030	1	4	Maniema	Rural	Male	Protestant	Married (monogamous)	Informal agricultural	65-69	15			2756812	175200	48000	815936	369200	0	0	0	8000	0	0	229360	4402508	Matched (3)	0	0	6	No	No	36	Informal agricultural	Protestant
3480	1	Pool de Bas	19	Tshopo	Township	Female	Spouse of the household head	Congolaise	Catholic	6	No	348001	34800102	2	3480	1	2	Province Orientale	Urban	Male	Catholic	Married (monogamous)	Public	60-64	6			2756812	175200	48000	815936	369200	0	0	0	8000	0	0	229360	4402508	Matched (3)	0	0	6	No	No	57	Public	Catholic
600	1	Pool de Boma	38	Kongo Centra	Urban	Female	Child of the household head	Congolaise	Catholic	6	Yes	60001	6000102	2	600	1	2	Bas-Congo	Urban	Female	Catholic	Cohabiting	Public	30-34	4			2756812	175200	48000	815936	369200	0	0	0	8000	0	0	229360	4402508	Matched (3)	0	0	6	Yes	Yes	11	Public	Catholic
3940	1	Pool de Uvir	35	Sud-Kivu	Township	Female	Spouse of the household head	Congolaise	Protestant	6	No	394001	39400102	2	3940	1	2	Sud-Kivu	Urban	Male	Protestant	Married (monogamous)	Informal non-agricultural	35-39	8	45888.95291		2756812	175200	48000	815936	369200	0	0	0	8000	0	0	229360	4402508	Matched (3)	0	0	6	No	No	32	Informal non-agricultural	Protestant
1080	1	Pool de Mban	3	Equateur	Urban	Male	Child of the household head	Congolaise	Catholic	6	Yes	108001	10800103	3	1080	1	3	Equateur	Urban	Male	Other Christian	Married (monogamous)	Informal agricultural	55-59	7			2756812	175200	48000	815936	369200	0	0	0	8000	0	0	229360	4402508	Matched (3)	0	0	6	Yes	Yes	19	Informal agricultural	Catholic
8350	1	Pool de Kami	999	Haut-Lomami	Rural	Male	Chef de ménage	Congolaise	Other Christian	6	No	835001	83500101	1	8350	1	1	Katanga	Rural	Male	Other Christian	Married (monogamous)	Informal agricultural	25-29	4	10000		2756812	175200	48000	815936	369200	0	0	0	8000	0	0	229360	4402508	Matched (3)	0	0	6	No	No	28	Informal agricultural	Other Christian
950	1	Pool de Kikw	28	Kwilu	Urban	Female	Child of the household head	Congolaise	Other Christian	6	Yes	95001	9500103	3	950	1	3	Bandundu	Urban	Male	Other Christian	Married (monogamous)	Chomeurs	50-54	5			576450	132675	32000	13927	72613	7200	0	0	0	0	0	5600	840465	Matched (3)	0	0	6	Yes	Yes	18	Chomeurs	Other Christian
2430	1	Mbuji-Mayi Cluster	999	Kasai-Orient	Urban	Male	Chef de ménage	Congolaise	Catholic	6	No	243001	24300101	1	2430	1	1	Kasaî Oriental	Urban	Male	Catholic	Married (monogamous)	Informal non-agricultural	30-34	7	17914.06328		2756812	175200	48000	815936	369200	0	0	0	8000	0	0	229360	4402508	Matched (3)	0	0	6	No	No	34	Informal non-agricultural	Catholic
1150	1	Pool de Zong	116	Sud-Ubangi	Urban	Female	Child of the household head	Congolaise	Catholic	6	Yes	115001	11500104	4	1150	1	4	Equateur	Urban	Male	Catholic	Married (polygamous)	Public	40-44	5			2756812	175200	48000	815936	369200	0	0	0	8000	0	0	229360	4402508	Matched (3)	0	0	6	Yes	Yes	8	Public	Catholic
6500	1	Pool de Boku	2	Tshuapa	Rural	Female	Child of the household head	Congolaise	Catholic	6	Yes	650001	65000106	6	6500	1	6	Equateur	Rural	Male	Catholic	Married (monogamous)	Public	35-39	11			2756812	175200	48000	815936	369200	0	0	0	8000	0	0	229360	4402508	Matched (3)	0	0	6	Yes	Yes	11	Public	Catholic
8950	1	Mbuji-Mayi Cluster	999	Kasai-Orient	Rural	Male	Child of the household head	Congolaise	Other Christian	6	Yes	895001	89500103	3	8950	1	3	Kasaî Oriental	Rural	Male	Other Christian	Married (monogamous)	Informal agricultural	30-34	6			2756812	175200	48000	815936	369200	0	0	0	8000	0	0	229360	4402508	Matched (3)	0	0	6	Yes	Yes	6	Informal agricultural	Other Christian
900	1	Pool de Band	33	Kwilu	Urban	Female	Chef de ménage	Congolaise	Other Christian	6	No	90001	9000101	1	900	1	1	Bandundu	Urban	Female	Other Christian	Single	Inactive	20-24	1			1167800	158600	76000	429922	28000	38000	34640	9612	30000	0	0	0	1972574	Matched (3)	0	0	6	No	No	24	Inactive	Other Christian
7160	1	Isiro Cluster	2	Haut-Uele	Rural	Female	Child of the household head	Congolaise	Protestant	6	Yes	716001	71600108	8	7160	1	8	Province Orientale	Rural	Male	Protestant	Married (monogamous)	Informal agricultural	50-54	9			2756812	175200	48000	815936	369200	0	0	0	8000	0	0	229360	4402508	Matched (3)	0	0	6	Yes	Yes	8	Informal agricultural	Protestant
1170	1	Pool de Zong	20	Sud-Ubangi	Urban	Female	Child of the household head	Congolaise	Protestant	6	No	117001	11700104	4	1170	1	4	Equateur	Urban	Male	Protestant	Married (monogamous)	Informal non-agricultural	40-44	11	10000		1487180	97600	542020	99327	83252	17000	0	0	2440	33000	0	82120	2443939	Matched (3)	1.350279	1.350279	6	No	No	17	Informal non-agricultural	Protestant
3470	1	Pool de Bas	19	Tshopo	Township	Female	Spouse of the household head	Congolaise	Other religion	6	No	347001	34700102	2	3470	1	2	Province Orientale	Urban	Male	Other religion	Married (monogamous)	Informal agricultural	45-49	5	14713.79952		1283440	0	108000	149491	169000	30800	8000	26877	0	0	0	178480	1954088	Matched (3)	0	0	6	No	No	27	Informal agricultural	Other religion
3612	1	Isiro Cluster	3	Haut-Uele	Township	Female	Child of the household head	Congolaise	Catholic	6	Yes	361201	36120103	3	3612	1	3	Province Orientale	Urban	Male	Catholic	Married (monogamous)	Public	65-69	4			688708	29562	18000	184316	23287	3000	0	0	10400	44500	0	31800	1033572	Matched (3)	4.305456	4.305456	6	Yes	Yes	12	Public	Catholic
4830	1	Pool de Mwek	29	Kasai	Township	Female	Other parent	Congolaise	Other Christian	6	No	483001	48300104	4	4830	1	4	Kasaî occidental	Urban	Male	Catholic	Married (monogamous)	Informal non-agricultural	35-39	10			939050	89670	0	13927	10455	0	0	0	0	0	0	0	1053103	Matched (3)	0	0	6	No	No	36	Informal non-agricultural	Other Christian
7990	1	Pool de Kibo	1	Maniema	Rural	Male	Other parent	Congolaise	Protestant	6	Yes	799001	79900107	7	7990	1	7	Maniema	Rural	Male	Protestant	Married (monogamous)	Public	30-34	8	3000		2756812	175200	48000	815936	369200	0	0	0	8000	0	0	229360	4402508	Matched (3)	0	0	6	Yes	Yes	12	Public	Protestant
9730	1	Pool de Mwek	6	Kasai	Rural	Female	Child of the household head	Congolaise	Other Christian	6	Yes	973001	97300106	6	9730	1	6	Kasaî occidental	Rural	Male	Other Christian	Married (monogamous)	Informal agricultural	50-54	8			2756812	175200	48000	815936	369200	0	0	0	8000	0	0	229360	4402508	Matched (3)	0	0	6	Yes	Yes	13	Informal agricultural	Other Christian
6970	1	Pool de Bun	2	Ituri	Rural	Male	Child of the household head	Congolaise	Catholic	6	Yes	697001	69700106	6	6970	1	6	Province Orientale	Rural	Male	Catholic	Married (polygamous)	Informal agricultural	55-59	11			2756812	175200	48000	815936	369200	0	0	0	8000	0	0	229360	4402508	Matched (3)	0	0	6	Yes	Yes	7	Informal agricultural	Catholic
5090	1	Pool de Band	5	Mai-Ndombe	Rural	Female	Spouse of the household head	Congolaise	Musulmane	6	No	509001	50900102	2	5090	1	2	Bandundu	Rural	Male	Musulmane	Married (monogamous)	Informal agricultural	30-34	5			2756812	175200	48000	815936	369200	0	0	0	8000	0	0	229360	4402508	Matched (3)	0	0	6	No	No	26	Informal agricultural	Musulmane
7860	1	Pool de Buka	5	Sud-Kivu	Rural	Male	Chef de ménage	Congolaise	Catholic	6	No	786001	78600101	1	7860	1	1	Sud-Kivu	Rural	Male	Catholic	Married (monogamous)	Chomeurs	25-29	3			2076460	0	0	936806	15860	0	48800	0	0	0	0	0	3077926	Matched (3)	0	0	6	No	No	28	Chomeurs	Catholic
3550	1	Pool de Bun	9	Ituri	Township	Female	Spouse of the household head	Congolaise	Catholic	6	No	355001	35500102	2	3550	1	2	Province Orientale	Urban	Male	Catholic	Married (monogamous)	Informal non-agricultural	40-44	5	40000		2756812	175200	48000	815936	369200	0	0	0	8000	0	0	229360	4402508	Matched (3)	0	0	6	No	No	32	Informal non-agricultural	Catholic
3530	1	Pool de Bun	5	Ituri	Township	Female	Child of the household head	Congolaise	Catholic	6	No	353001	35300106	6	3530	1	6	Province Orientale	Urban	Male	Catholic	Married (monogamous)	Formal private sector	65-69	10	20000		2756812	175200	48000	815936	369200	0	0	0	8000	0	0	229360	4402508	Matched (3)	0	0	6	No	No	16	Formal private sector	Catholic
4370	1	Pool de Lubu	999	Haut-Katanga	Township	Female	Spouse of the household head	Congolaise	Protestant	6	No	437001	43700102	2	4370	1	2	Katanga	Urban	Male	Protestant	Married (monogamous)	Public	55-59	7			2756812	175200	48000	815936	369200	0	0	0	8000	0	0	229360	4402508	Matched (3)	0	0	6	No	No	55	Public	Protestant
320	1	Kinshasa Cluster	19	Kinshasa	Urban	Female	Child of the household head	Congolaise	Other Christian	6	No	32001	3200103	3	320	1	3	Kinshasa	Urban	Male	Other Christian	Married (monogamous)	Public	55-59	6	0		331840	0	2440	133696	0	0	0	0	0	0	0	0	467976	Matched (3)	0	0	6	No	No	30	Public	Other Christian
3960	1	Pool de Uvir	132	Sud-Kivu	Township	Male	Other person	Congolaise	Catholic	6	Yes	396001	39600111	11	3960	1	11	Sud-Kivu	Urban	Female	Catholic	Married (monogamous)	Informal non-agricultural	55-59	11			2756812	175200	48000	815936	369200	0	0	0	8000	0	0	229360	4402508	Matched (3)	0	0	6	Yes	Yes	16	Informal non-agricultural	Catholic
7780	1	Pool de Buka	6	Sud-Kivu	Rural	Male	Child of the household head	Congolaise	Kimbanguist	6	Yes	778001	77800105	5	7780	1	5	Sud-Kivu	Rural	Male	Protestant	Married (monogamous)	Informal agricultural	50-54	5			2756812	175200	48000	815936	369200	0	0	0	8000	0	0	229360	4402508	Matched (3)	0	0	6	Yes	Yes	14	Informal agricultural	Kimbanguist
5520	1	Pool de Fesh	2	Kwango	Rural	Female	Other parent	Congolaise	Catholic	6	No	552001	55200102	2	5520	1	2	Bandundu	Rural	Male	Catholic	Missing	Informal agricultural	30-34	7			2756812	175200	48000	815936	369200	0	0	0	8000	0	0	229360	4402508	Matched (3)	0	0	6	No	No	66	Informal agricultural	Catholic
6990	1	Pool de Bun	5	Ituri	Rural	Male	Chef de ménage	Congolaise	Catholic	6	No	699001	69900101	1	6990	1	1	Province Orientale	Rural	Male	Catholic	Cohabiting	Informal agricultural	25-29	3	46017.0433	53000	2756812	175200	48000	815936	369200	0	0	0	8000	0	0	229360	4402508	Matched (3)	0	0	6	No	No	26	Informal agricultural	Catholic
960	1	Pool de Kikw	1	Kwilu	Urban	Female	Spouse of the household head	Congolaise	Protestant	6	No	96001	9600102	2	960	1	2	Bandundu	Urban	Male	Protestant	Married (monogamous)	Informal non-agricultural	35-39	8	50000		2756812	175200	48000	815936	369200	0	0	0	8000	0	0	229360	4402508	Matched (3)	0	0	6	No	No	25	Informal non-agricultural	Protestant
160	1	Kinshasa Cluster	13	Kinshasa	Urban	Female	Child of the household head	Congolaise	Catholic	6	No	16001	1600103	3	160	1	3	Kinshasa	Urban	Male	Catholic	Married (monogamous)	Inactive	70-74	5			2756812	175200	48000	815936	369200	0	0	0	8000	0	0	229360	4402508	Matched (3)	0	0	6	No	No	44	Inactive	Catholic
2950	1	Pool de Band	33	Mai-Ndombe	Township	Female	Child of the household head	Congolaise	Protestant	6	Yes	295001	29500106	6	2950	1	6	Bandundu	Urban	Male	Protestant	Married (monogamous)	Informal agricultural	35-39	8			2756812	175200	48000	815936	369200	0	0	0	8000	0	0	229360	4402508	Matched (3)	0	0	6	Yes	Yes	8	Informal agricultural	Protestant
2960	1	Pool de Band	15	Mai-Ndombe	Township	Male	Child of the household head	Congolaise	Catholic	6	Yes	296001	29600104	4	2960	1	4	Bandundu	Urban	Male	Catholic	Married (monogamous)	Inactive	70-74	4			2756812	175200	48000	815936	369200	0	0	0	8000	0	0	229360	4402508	Matched (3)	0	0	6	Yes	Yes	13	Inactive	Catholic
1440	1	Kisangani Cluster	28	Tshopo	Urban	Female	Spouse of the household head	Congolaise	Protestant	6	No	144001	14400102	2	1440	1	2	Province Orientale	Urban	Male	Protestant	Married (monogamous)	Public	55-59	4	48489.87122		2756812	175200	48000	815936	369200	0	0	0	8000	0	0	229360	4402508	Matched (3)	0	0	6	No	No	40	Public	Protestant
2190	1	Pool de Lika	999	Haut-Katanga	Urban	Female	Spouse of the household head	Congolaise	Other Christian	6	No	219001	21900102	2	2190	1	2	Katanga	Urban	Male	Other Christian	Married (monogamous)	Informal non-agricultural	30-34	6			2756812	175200	48000	815936	369200	0	0	0	8000	0	0	229360	4402508	Matched (3)	0	0	6	No	No	23	Informal non-agricultural	Other Christian
1000	1	Pool de Kikw	4	Kwilu	Urban	Female	Spouse of the household head	Congolaise	Protestant	6	No	100001	10000102	2	1000	1	2	Bandundu	Urban	Male	Protestant	Cohabiting	Public	45-49	7			2756812	175200	48000	815936	369200	0	0	0	8000	0	0	229360	4402508	Matched (3)	0	0	6	No	No	38	Public	Protestant
7100	1	Isiro Cluster	2	Haut-Uele	Rural	Male	Chef de ménage	Congolaise	Catholic	6	No	710001	71000101	1	7100	1	1	Province Orientale	Rural	Male	Catholic	Cohabiting	Informal agricultural	25-29	5	2000		2756812	175200	48000	815936	369200	0	0	0	8000	0	0	229360	4402508	Matched (3)	0	0	6	No	No	27	Informal agricultural	Catholic
3401	1	Pool de Lisa	24	Mongala	Township	Male	Other parent	Congolaise	Catholic	6	Yes	340101	34010103	3	3401	1	3	Equateur	Urban	Female	Catholic	Widowed	Inactive	70-74	5			2756812	175200	48000	815936	369200	0	0	0	8000	0	0	229360	4402508	Matched (3)	0	0	6	Yes	Yes	14	Inactive	Catholic
3690	1	Pool de Buta	9	Bas-Uele	Township	Female	Spouse of the household head	Congolaise	Other Christian	6	No	369001	36900102	2	3690	1	2	Province Orientale	Urban	Male	Other Christian	Cohabiting	Informal non-agricultural	40-44	6	18000		2756812	175200	48000	815936	369200	0	0	0	8000	0	0	229360	4402508	Matched (3)	0	0	6	No	No	38	Informal non-agricultural	Other Christian
3510	1	Pool de Bun	15	Ituri	Township	Female	Child of the household head	Congolaise	Catholic	6	Yes	351001	35100104	4	3510	1	4	Province Orientale	Urban	Male	Catholic	Married (monogamous)	Public	60-64	18			2756812	175200	48000	815936	369200	0	0	0	8000	0	0	229360	4402508	Matched (3)	0	0	6	Yes	Yes	26	Public	Catholic
9460	1	Pool de Mwen	999	Lomami	Rural	Male	Chef de ménage	Congolaise	Protestant	6	No	946001	94600101	1	9460	1	1	Kasaî Oriental	Rural	Male	Protestant	Married (monogamous)	Informal agricultural	30-34	7	25000		2756812	175200	48000	815936	369200	0	0	0	8000	0	0	229360	4402508	Matched (3)	0	0	6	No	No	30	Informal agricultural	Protestant
5770	1	Pool de Basa	5	Equateur	Rural	Male	Chef de ménage	Congolaise	Kimbanguist	6	No	577001	57700101	1	5770	1	1	Equateur	Rural	Male	Kimbanguist	Married (monogamous)	Public	25-29	7	45020.50433	45245.20433	2756812	175200	48000	815936	369200	0	0	0	8000	0	0	229360	4402508	Matched (3)	0	0	6	No	No	28	Public	Kimbanguist
4690	1	Pool de Mwen	999	Lomami	Township	Male	Child of the household head	Congolaise	Other religion	6	Yes	469001	46900108	8	4690	1	8	Kasaî Oriental	Urban	Male	Other religion	Married (monogamous)	Public	35-39	9			2756812	175200	48000	815936	369200	0	0	0	8000	0	0	229360	4402508	Matched (3)	0	0	6	Yes	Yes	15	Public	Other religion
4500	1	Mbuji-Mayi Cluster	999	Kasai-Orient	Township	Female	Spouse of the household head	Congolaise	Other Christian	6	No	450001	45000102	2	4500	1	2	Kasaî Oriental	Urban	Male	Other Christian	Married (monogamous)	Informal non-agricultural	30-34	4			513620	0	0	211776	0	0	0	0	0	0	0	0	725396	Matched (3)	0	0	6	No	No	20	Informal non-agricultural	Other Christian
2640	1	Pool de Kana	999	Kasai-Centra	Urban	Female	Other parent	Congolaise	Protestant	6	Yes	264001	26400103	3	2640	1	3	Kasaî occidental	Urban	Female	Protestant	Widowed	Public	60-64	6			2036500	18300	160000	224480	94000	50000	260000	0	10000	0	0	68000	2921280	Matched (3)	0	0	6	Yes	Yes	6	Public	Protestant
8260	1	Pool de Kasa	999	Lualaba	Rural	Female	Child of the household head	Congolaise	Catholic	6	Yes	826001	82600109	9	8260	1	9	Katanga	Rural	Male	Catholic	Married (monogamous)	Informal agricultural	50-54	11			2756812	175200	48000	815936	369200	0	0	0	8000	0	0	229360	4402508	Matched (3)	0	0	6	Yes	Yes	5	Informal agricultural	Catholic
4390	1	Pool de Lubu	999	Haut-Katanga	Township	Female	Child of the household head	Congolaise	Catholic	6	No	439001	43900103	3	4390	1	3	Katanga	Urban	Male	Catholic	Married (monogamous)	Retired	55-59	11			2756812	175200	48000	815936	369200	0	0	0	8000	0	0	229360	4402508	Matched (3)	0	0	6	No	No	22	Retired	Catholic
3613	1	Isiro Cluster	2	Haut-Uele	Township	Male	Chef de ménage	Congolaise	Catholic	6	No	361301	36130101	1	3613	1	1	Province Orientale	Urban	Male	Catholic	Cohabiting	Informal agricultural	30-34	5	15000		2756812	175200	48000	815936	369200	0	0	0	8000	0	0	229360	4402508	Matched (3)	0	0	6	No	No	31	Informal agricultural	Catholic
1880	1	Pool de Buka	40	Sud-Kivu	Urban	Female	Spouse of the household head	Congolaise	Catholic	6	No	188001	18800102	2	1880	1	2	Sud-Kivu	Urban	Male	Catholic	Married (monogamous)	Informal non-agricultural	45-49	9	20260.90317		2756812	175200	48000	815936	369200	0	0	0	8000	0	0	229360	4402508	Matched (3)	0	0	6	No	No	40	Informal non-agricultural	Catholic
9230	1	Pool de Lusa	999	Sankuru	Rural	Male	Child of the household head	Congolaise	Other Christian	6	Yes	923001	92300106	6	9230	1	6	Kasaî Oriental	Rural	Male	Other Christian	Married (monogamous)	Informal agricultural	50-54	9			800320	0	0	54134	2440	0	0	0	0	0	0	19520	876414	Matched (3)	0	0	6	Yes	Yes	12	Informal agricultural	Other Christian
990	1	Pool de Kikw	6	Kwilu	Urban	Male	Other parent	Congolaise	Catholic	6	No	99001	9900103	3	990	1	3	Bandundu	Urban	Male	Catholic	Single	Public	30-34	3			2756812	175200	48000	815936	369200	0	0	0	8000	0	0	229360	4402508	Matched (3)	0	0	6	No	No	38	Public	Catholic
2990	1	Pool de Band	9	Kwilu	Township	Male	Chef de ménage	Congolaise	Other religion	6	No	299001	29900101	1	2990	1	1	Bandundu	Urban	Male	Other religion	Married (monogamous)	Public	45-49	6	5000		2756812	175200	48000	815936	369200	0	0	0	8000	0	0	229360	4402508	Matched (3)	0	0	6	No	No	49	Public	Other religion
2893	1	Pool de Song	8	Kongo Centra	Township	Female	Child of the household head	Congolaise	Catholic	6	Yes	289301	28930103	3	2893	1	3	Bas-Congo	Urban	Male	Catholic	Single	Formal private sector	30-34	3			2756812	175200	48000	815936	369200	0	0	0	8000	0	0	229360	4402508	Matched (3)	0	0	6	Yes	Yes	11	Formal private sector	Catholic
8970	1	Mbuji-Mayi Cluster	999	Kasai-Orient	Rural	Male	Child of the household head	Congolaise	Protestant	6	Yes	897001	89700104	4	8970	1	4	Kasaî Oriental	Rural	Male	Protestant	Married (polygamous)	Informal agricultural	30-34	7			1108980	0	0	225439	50985	4880	0	12000	25000	28000	0	94760	1550043	Matched (3)	1.806401	1.806401	6	Yes	Yes	7	Informal agricultural	Protestant
3920	1	Pool de Uvir	999	Sud-Kivu	Township	Male	Chef de ménage	Congolaise	Protestant	6	No	392001	39200101	1	3920	1	1	Sud-Kivu	Urban	Male	Protestant	Married (monogamous)	Inactive	40-44	6			2756812	175200	48000	815936	369200	0	0	0	8000	0	0	229360	4402508	Matched (3)	0	0	6	No	No	43	Inactive	Protestant
100	1	Kinshasa Cluster	25	Kinshasa	Urban	Male	Chef de ménage	Congolaise	Other Christian	6	No	10001	1000101	1	100	1	1	Kinshasa	Urban	Male	Other Christian	Cohabiting	Informal non-agricultural	30-34	2	200000	46000	1136796	0	0	326471	41480	0	0	0	0	0	0	0	1504747	Matched (3)	0	0	6	No	No	33	Informal non-agricultural	Other Christian
1880	1	Pool de Buka	40	Sud-Kivu	Urban	Male	Chef de ménage	Congolaise	Catholic	6	No	188001	18800101	1	1880	1	1	Sud-Kivu	Urban	Male	Catholic	Married (monogamous)	Informal non-agricultural	45-49	9	20196.19673		2756812	175200	48000	815936	369200	0	0	0	8000	0	0	229360	4402508	Matched (3)	0	0	6	No	No	47	Informal non-agricultural	Catholic
8360	1	Pool de Kami	999	Haut-Lomami	Rural	Male	Child of the household head	Congolaise	Other religion	6	Yes	836001	83600103	3	8360	1	3	Katanga	Rural	Male	Other religion	Married (monogamous)	Informal agricultural	45-49	7			2756812	175200	48000	815936	369200	0	0	0	8000	0	0	229360	4402508	Matched (3)	0	0	6	Yes	Yes	18	Informal agricultural	Other religion
1810	1	Pool de Goma	4	Nord-Kivu	Urban	Female	Other parent	Congolaise	Catholic	6	Yes	181001	18100102	2	1810	1	2	Nord-Kivu	Urban	Female	Catholic	Divorced	Informal non-agricultural	40-44	4			2756812	175200	48000	815936	369200	0	0	0	8000	0	0	229360	4402508	Matched (3)	0	0	6	Yes	Yes	22	Informal non-agricultural	Catholic
2930	1	Pool de INo	48	Mai-Ndombe	Township	Female	Child of the household head	Congolaise	Catholic	6	Yes	293001	29300104	4	2930	1	4	Bandundu	Urban	Male	Other religion	Married (monogamous)	Public	40-44	9			2756812	175200	48000	815936	369200	0	0	0	8000	0	0	229360	4402508	Matched (3)	0	0	6	Yes	Yes	7	Public	Catholic
8200	1	Pool de Kasa	999	Lualaba	Rural	Female	Child of the household head	Congolaise	Catholic	6	Yes	820001	82000103	3	8200	1	3	Katanga	Rural	Male	Catholic	Married (monogamous)	Informal non-agricultural	45-49	6			2756812	175200	48000	815936	369200	0	0	0	8000	0	0	229360	4402508	Matched (3)	0	0	6	Yes	Yes	12	Informal non-agricultural	Catholic
860	1	Pool de Band	23	Kwilu	Urban	Female	Other parent	Congolaise	Catholic	6	Yes	86001	8600104	4	860	1	4	Bandundu	Urban	Male	Catholic	Married (monogamous)	Informal non-agricultural	75-79	6			2756812	175200	48000	815936	369200	0	0	0	8000	0	0	229360	4402508	Matched (3)	0	0	6	Yes	Yes	19	Informal non-agricultural	Catholic
8820	1	Pool de Kase	999	Haut-Katanga	Rural	Female	Child of the household head	Congolaise	Protestant	6	Yes	882001	88200103	3	8820	1	3	Katanga	Rural	Male	Protestant	Married (monogamous)	Informal agricultural	35-39	5	0		874740	0	0	52967	0	0	0	0	0	0	0	0	927707	Matched (3)	0	0	6	Yes	Yes	15	Informal agricultural	Protestant
3950	1	Pool de Uvir	24	Sud-Kivu	Township	Female	Child of the household head	Congolaise	Other Christian	6	No	395001	39500105	5	3950	1	5	Sud-Kivu	Urban	Male	Other Christian	Married (monogamous)	Chomeurs	55-59	5	30000		2756812	175200	48000	815936	369200	0	0	0	8000	0	0	229360	4402508	Matched (3)	0	0	6	No	No	27	Chomeurs	Other Christian
8030	1	Pool de Pun	1	Maniema	Rural	Female	Child of the household head	Congolaise	Protestant	6	Yes	803001	80300113	13	8030	1	13	Maniema	Rural	Male	Protestant	Married (monogamous)	Informal agricultural	65-69	15			2756812	175200	48000	815936	369200	0	0	0	8000	0	0	229360	4402508	Matched (3)	0	0	6	Yes	Yes	13	Informal agricultural	Protestant
2070	1	Pool de Kolw	999	Lualaba	Urban	Male	Child of the household head	Congolaise	Protestant	6	Yes	207001	20700103	3	2070	1	3	Katanga	Urban	Male	Protestant	Married (monogamous)	Informal non-agricultural	35-39	8			2756812	175200	48000	815936	369200	0	0	0	8000	0	0	229360	4402508	Matched (3)	0	0	6	Yes	Yes	11	Informal non-agricultural	Protestant
3640	1	Isiro Cluster	16	Haut-Uele	Township	Female	Chef de ménage	Congolaise	Catholic	6	No	364001	36400101	1	3640	1	1	Province Orientale	Urban	Female	Catholic	Widowed	Informal non-agricultural	50-54	2	46190.63191		2756812	175200	48000	815936	369200	0	0	0	8000	0	0	229360	4402508	Matched (3)	0	0	6	No	No	53	Informal non-agricultural	Catholic
8100	1	Pool de Kasa	999	Lualaba	Rural	Female	Spouse of the household head	Congolaise	Protestant	6	No	810001	81000102	2	8100	1	2	Katanga	Rural	Male	Protestant	Married (monogamous)	Informal agricultural	40-44	6	20000		2756812	175200	48000	815936	369200	0	0	0	8000	0	0	229360	4402508	Matched (3)	0	0	6	No	No	28	Informal agricultural	Protestant
1130	1	Pool de Mban	3	Equateur	Urban	Female	Chef de ménage	Congolaise	Catholic	6	Yes	113001	11300101	1	1130	1	1	Equateur	Urban	Female	Catholic	Single	Inactive	20-24	2			2756812	175200	48000	815936	369200	0	0	0	8000	0	0	229360	4402508	Matched (3)	0	0	6	Yes	Yes	20	Inactive	Catholic
3413	1	Pool de Boku	4	Tshuapa	Township	Male	Child of the household head	Congolaise	Other Christian	6	Yes	341301	34130106	6	3413	1	6	Equateur	Urban	Male	Other Christian	Married (monogamous)	Informal non-agricultural	50-54	6	4000		432664	13071	0	30064	0	0	0	0	0	0	0	0	475800	Matched (3)	0	0	6	Yes	Yes	13	Informal non-agricultural	Other Christian
3390	1	Pool de Lisa	37	Mongala	Township	Male	Child of the household head	Congolaise	Other Christian	6	Yes	339001	33900103	3	3390	1	3	Equateur	Urban	Male	Other Christian	Married (monogamous)	Informal non-agricultural	50-54	6			2756812	175200	48000	815936	369200	0	0	0	8000	0	0	229360	4402508	Matched (3)	0	0	6	Yes	Yes	17	Informal non-agricultural	Other Christian
6120	1	Pool de Gbad	2	Nord-Ubangi	Rural	Female	Child of the household head	Congolaise	Protestant	6	Yes	612001	61200103	3	6120	1	3	Equateur	Rural	Male	Protestant	Married (monogamous)	Informal agricultural	25-29	6			2756812	175200	48000	815936	369200	0	0	0	8000	0	0	229360	4402508	Matched (3)	0	0	6	Yes	Yes	6	Informal agricultural	Protestant
9240	1	Pool de Lusa	999	Sankuru	Rural	Male	Child of the household head	Congolaise	Protestant	6	Yes	924001	92400107	7	9240	1	7	Kasaî Oriental	Rural	Female	Protestant	Widowed	Informal agricultural	40-44	9			2756812	175200	48000	815936	369200	0	0	0	8000	0	0	229360	4402508	Matched (3)	0	0	6	Yes	Yes	6	Informal agricultural	Protestant
3220	1	Pool de Basa	121	Equateur	Township	Male	Chef de ménage	Congolaise	Protestant	6	No	322001	32200101	1	3220	1	1	Equateur	Urban	Male	Protestant	Married (monogamous)	Informal agricultural	25-29	7	16000		2756812	175200	48000	815936	369200	0	0	0	8000	0	0	229360	4402508	Matched (3)	0	0	6	No	No	27	Informal agricultural	Protestant
2370	1	Mbuji-Mayi Cluster	999	Kasai-Orient	Urban	Male	Child of the household head	Congolaise	Protestant	6	Yes	237001	23700107	7	2370	1	7	Kasaî Oriental	Urban	Male	Protestant	Married (monogamous)	Public	55-59	8			204660	0	1000	23302	16800	35000	0	0	0	0	95160	12700	388622	Matched (3)	0	0	6	Yes	Yes	11	Public	Protestant
8900	1	Mbuji-Mayi Cluster	999	Kasai-Orient	Rural	Female	Child of the household head	Congolaise	Catholic	6	Yes	890001	89000105	5	8900	1	5	Kasaî Oriental	Rural	Male	Catholic	Married (monogamous)	Informal agricultural	35-39	9			2756812	175200	48000	815936	369200	0	0	0	8000	0	0	229360	4402508	Matched (3)	0	0	6	Yes	Yes	8	Informal agricultural	Catholic
3241	1	Pool de Geme	29	Sud-Ubangi	Township	Male	Child of the household head	Congolaise	Catholic	6	Yes	324101	32410103	3	3241	1	3	Equateur	Urban	Female	Catholic	Widowed	Informal agricultural	45-49	7			2756812	175200	48000	815936	369200	0	0	0	8000	0	0	229360	4402508	Matched (3)	0	0	6	Yes	Yes	17	Informal agricultural	Catholic
2480	1	Mbuji-Mayi Cluster	999	Kasai-Orient	Urban	Male	Child of the household head	Congolaise	Other Christian	6	No	248001	24800103	3	2480	1	3	Kasaî Oriental	Urban	Male	Other Christian	Married (monogamous)	Formal private sector	60-64	6			2756812	175200	48000	815936	369200	0	0	0	8000	0	0	229360	4402508	Matched (3)	0	0	6	No	No	24	Formal private sector	Other Christian
8900	1	Mbuji-Mayi Cluster	999	Kasai-Orient	Rural	Male	Child of the household head	Congolaise	Catholic	6	Yes	890001	89000104	4	8900	1	4	Kasaî Oriental	Rural	Male	Catholic	Married (monogamous)	Informal agricultural	35-39	9			2756812	175200	48000	815936	369200	0	0	0	8000	0	0	229360	4402508	Matched (3)	0	0	6	Yes	Yes	10	Informal agricultural	Catholic
6840	1	Pool de Bas	3	Tshopo	Rural	Female	Child of the household head	Congolaise	Other religion	6	Yes	684001	68400103	3	6840	1	3	Province Orientale	Rural	Male	Protestant	Married (monogamous)	Informal agricultural	30-34	7			2756812	175200	48000	815936	369200	0	0	0	8000	0	0	229360	4402508	Matched (3)	0	0	6	Yes	Yes	8	Informal agricultural	Other religion
9780	1	Pool de Mwek	3	Kasai	Rural	Female	Spouse of the household head	Congolaise	Other Christian	6	No	978001	97800102	2	9780	1	2	Kasaî occidental	Rural	Male	Other Christian	Married (monogamous)	Informal non-agricultural	40-44	7			2756812	175200	48000	815936	369200	0	0	0	8000	0	0	229360	4402508	Matched (3)	0	0	6	No	No	29	Informal non-agricultural	Other Christian
320	1	Kinshasa Cluster	19	Kinshasa	Urban	Female	Spouse of the household head	Congolaise	Other Christian	6	No	32001	3200102	2	320	1	2	Kinshasa	Urban	Male	Other Christian	Married (monogamous)	Public	55-59	6	18106.40882		2756812	175200	48000	815936	369200	0	0	0	8000	0	0	229360	4402508	Matched (3)	0	0	6	No	No	48	Public	Other Christian
6250	1	Pool de Gbad	7	Nord-Ubangi	Rural	Male	Chef de ménage	Congolaise	Protestant	6	No	625001	62500101	1	6250	1	1	Equateur	Rural	Male	Protestant	Divorced	Informal agricultural	35-39	3	20000		2756812	175200	48000	815936	369200	0	0	0	8000	0	0	229360	4402508	Matched (3)	0	0	6	No	No	38	Informal agricultural	Protestant
3380	1	Pool de Lisa	208	Mongala	Township	Male	Child of the household head	Congolaise	Catholic	6	Yes	338001	33800107	7	3380	1	7	Equateur	Urban	Male	Catholic	Married (polygamous)	Informal non-agricultural	65-69	9			2756812	175200	48000	815936	369200	0	0	0	8000	0	0	229360	4402508	Matched (3)	0	0	6	Yes	Yes	11	Informal non-agricultural	Catholic
3930	1	Pool de Uvir	999	Sud-Kivu	Township	Female	Other person	Congolaise	Musulmane	6	No	393001	39300102	2	3930	1	2	Sud-Kivu	Urban	Female	Musulmane	Cohabiting	Informal non-agricultural	20-24	9			2756812	175200	48000	815936	369200	0	0	0	8000	0	0	229360	4402508	Matched (3)	0	0	6	No	No	17	Informal non-agricultural	Musulmane
9310	1	Pool de Kabi	999	Lomami	Rural	Male	Chef de ménage	Congolaise	Catholic	6	No	931001	93100101	1	9310	1	1	Kasaî occidental	Rural	Male	Catholic	Married (monogamous)	Public	40-44	5	0	3000	2756812	175200	48000	815936	369200	0	0	0	8000	0	0	229360	4402508	Matched (3)	0	0	6	No	No	42	Public	Catholic
980	1	Pool de Kikw	149	Kwilu	Urban	Male	Child of the household head	Congolaise	Kimbanguist	6	Yes	98001	9800106	6	980	1	6	Bandundu	Urban	Male	Kimbanguist	Married (monogamous)	Public	50-54	9			2756812	175200	48000	815936	369200	0	0	0	8000	0	0	229360	4402508	Matched (3)	0	0	6	Yes	Yes	18	Public	Kimbanguist
1490	1	Pool de Beni	2	Nord-Kivu	Urban	Male	Child of the household head	Congolaise	Catholic	6	Yes	149001	14900103	3	1490	1	3	Nord-Kivu	Urban	Female	Catholic	Divorced	Informal agricultural	50-54	5			2756812	175200	48000	815936	369200	0	0	0	8000	0	0	229360	4402508	Matched (3)	0	0	6	Yes	Yes	18	Informal agricultural	Catholic
2070	1	Pool de Kolw	999	Lualaba	Urban	Female	Spouse of the household head	Congolaise	Protestant	6	No	207001	20700102	2	2070	1	2	Katanga	Urban	Male	Protestant	Married (monogamous)	Informal non-agricultural	35-39	8			2756812	175200	48000	815936	369200	0	0	0	8000	0	0	229360	4402508	Matched (3)	0	0	6	No	No	31	Informal non-agricultural	Protestant
3160	1	Pool de Keng	4	Kwango	Township	Female	Child of the household head	Congolaise	Other Christian	6	Yes	316001	31600107	7	3160	1	7	Bandundu	Urban	Female	Other Christian	Married (polygamous)	Informal agricultural	40-44	8			2756812	175200	48000	815936	369200	0	0	0	8000	0	0	229360	4402508	Matched (3)	0	0	6	Yes	Yes	9	Informal agricultural	Other Christian
6270	1	Pool de Lisa	2	Mongala	Rural	Female	Child of the household head	Congolaise	Catholic	6	Yes	627001	62700104	4	6270	1	4	Equateur	Rural	Male	Catholic	Married (monogamous)	Informal agricultural	35-39	8			1256420	136640	16000	206400	80440	100000	20000	30000	32000	35000	0	0	1912900	Matched (3)	1.829683	1.829683	6	Yes	Yes	9	Informal agricultural	Catholic
3040	1	Pool de Idio	9	Kwilu	Township	Female	Child of the household head	Congolaise	Catholic	6	Yes	304001	30400102	2	3040	1	2	Bandundu	Urban	Female	Catholic	Married (monogamous)	Informal agricultural	35-39	3			2756812	175200	48000	815936	369200	0	0	0	8000	0	0	229360	4402508	Matched (3)	0	0	6	Yes	Yes	14	Informal agricultural	Catholic
9540	1	Pool de Kana	999	Kasai-Centra	Rural	Male	Child of the household head	Congolaise	None	6	No	954001	95400102	2	9540	1	2	Kasaî occidental	Rural	Female	Other Christian	Widowed	Informal agricultural	60-64	3			2756812	175200	48000	815936	369200	0	0	0	8000	0	0	229360	4402508	Matched (3)	0	0	6	No	No	12	Informal agricultural	None
2690	1	Pool de Kana	999	Kasai-Centra	Urban	Female	Other parent	Congolaise	Other Christian	6	Yes	269001	26900106	6	2690	1	6	Kasaî occidental	Urban	Female	Other Christian	Widowed	Chomeurs	45-49	8			2756812	175200	48000	815936	369200	0	0	0	8000	0	0	229360	4402508	Matched (3)	0	0	6	Yes	Yes	19	Chomeurs	Other Christian
7610	1	Pool de Goma	2	Nord-Kivu	Rural	Male	Chef de ménage	Congolaise	Other Christian	6	No	761001	76100101	1	7610	1	1	Nord-Kivu	Rural	Male	Other Christian	Married (monogamous)	Informal agricultural	30-34	7	46175.48923		2756812	175200	48000	815936	369200	0	0	0	8000	0	0	229360	4402508	Matched (3)	0	0	6	No	No	30	Informal agricultural	Other Christian
3430	1	Pool de Bas	2	Tshopo	Township	Male	Chef de ménage	Congolaise	Catholic	6	No	343001	34300101	1	3430	1	1	Province Orientale	Urban	Male	Catholic	Married (monogamous)	Informal agricultural	55-59	7	10000		2756812	175200	48000	815936	369200	0	0	0	8000	0	0	229360	4402508	Matched (3)	0	0	6	No	No	55	Informal agricultural	Catholic
480	1	Kinshasa Cluster	55	Kinshasa	Urban	Male	Child of the household head	Congolaise	Catholic	6	Yes	48001	4800104	4	480	1	4	Kinshasa	Urban	Male	Catholic	Married (monogamous)	Public	65-69	7			488000	0	0	0	24400	0	0	0	0	0	0	0	512400	Matched (3)	0	0	6	Yes	Yes	20	Public	Catholic
5310	1	Pool de Kikw	1	Kwilu	Rural	Female	Child of the household head	Congolaise	Animist	6	Yes	531001	53100104	4	5310	1	4	Bandundu	Rural	Female	Other Christian	Widowed	Informal agricultural	50-54	4	25000		2756812	175200	48000	815936	369200	0	0	0	8000	0	0	229360	4402508	Matched (3)	0	0	6	Yes	Yes	17	Informal agricultural	Animist
2790	1	Pool de Tshi	999	Kasai	Urban	Female	Spouse of the household head	Congolaise	Other Christian	6	No	279001	27900102	2	2790	1	2	Kasaî occidental	Urban	Male	Other Christian	Married (monogamous)	Formal private sector	30-34	3	20000		2756812	175200	48000	815936	369200	0	0	0	8000	0	0	229360	4402508	Matched (3)	0	0	6	No	No	27	Formal private sector	Other Christian
6330	1	Pool de Lisa	1	Mongala	Rural	Female	Child of the household head	Congolaise	Catholic	6	Yes	633001	63300104	4	6330	1	4	Equateur	Rural	Male	Catholic	Cohabiting	Public	30-34	6			2756812	175200	48000	815936	369200	0	0	0	8000	0	0	229360	4402508	Matched (3)	0	0	6	Yes	Yes	6	Public	Catholic
7870	1	Pool de Kibo	1	Maniema	Rural	Male	Child of the household head	Congolaise	Catholic	6	Yes	787001	78700103	3	7870	1	3	Maniema	Rural	Male	Catholic	Married (monogamous)	Informal agricultural	50-54	6			2756812	175200	48000	815936	369200	0	0	0	8000	0	0	229360	4402508	Matched (3)	0	0	6	Yes	Yes	11	Informal agricultural	Catholic
480	1	Kinshasa Cluster	55	Kinshasa	Urban	Male	Child of the household head	Congolaise	Catholic	6	Yes	48001	4800103	3	480	1	3	Kinshasa	Urban	Male	Catholic	Married (monogamous)	Public	65-69	7			2756812	175200	48000	815936	369200	0	0	0	8000	0	0	229360	4402508	Matched (3)	0	0	6	Yes	Yes	22	Public	Catholic
2130	1	Pool de Kolw	999	Lualaba	Urban	Male	Chef de ménage	Congolaise	Protestant	6	No	213001	21300101	1	2130	1	1	Katanga	Urban	Male	Protestant	Married (monogamous)	Formal private sector	25-29	4	56000		2756812	175200	48000	815936	369200	0	0	0	8000	0	0	229360	4402508	Matched (3)	0	0	6	No	No	29	Formal private sector	Protestant
3600	1	Pool de Bun	39	Ituri	Township	Male	Child of the household head	Congolaise	Catholic	6	Yes	360001	36000103	3	3600	1	3	Province Orientale	Urban	Male	Catholic	Married (monogamous)	Chomeurs	45-49	5			2756812	175200	48000	815936	369200	0	0	0	8000	0	0	229360	4402508	Matched (3)	0	0	6	Yes	Yes	15	Chomeurs	Catholic
9060	1	Mbuji-Mayi Cluster	999	Kasai-Orient	Rural	Male	Chef de ménage	Congolaise	Other Christian	6	No	906001	90600101	1	9060	1	1	Kasaî Oriental	Rural	Male	Other Christian	Married (monogamous)	Informal non-agricultural	25-29	2	80000		2756812	175200	48000	815936	369200	0	0	0	8000	0	0	229360	4402508	Matched (3)	0	0	6	No	No	25	Informal non-agricultural	Other Christian
3185	1	Pool de Mban	10	Equateur	Township	Female	Child of the household head	Congolaise	Other Christian	6	Yes	318501	31850103	3	3185	1	3	Equateur	Urban	Male	Other Christian	Married (monogamous)	Informal agricultural	35-39	6			2756812	175200	48000	815936	369200	0	0	0	8000	0	0	229360	4402508	Matched (3)	0	0	6	Yes	Yes	16	Informal agricultural	Other Christian
7980	1	Pool de Kind	3	Maniema	Rural	Female	Spouse of the household head	Congolaise	Protestant	6	No	798001	79800102	2	7980	1	2	Maniema	Rural	Male	Other Christian	Married (polygamous)	Informal agricultural	45-49	7	15000		2756812	175200	48000	815936	369200	0	0	0	8000	0	0	229360	4402508	Matched (3)	0	0	6	No	No	37	Informal agricultural	Protestant
3500	1	Pool de Bas	9	Tshopo	Township	Female	Spouse of the household head	Congolaise	Catholic	6	Yes	350001	35000102	2	3500	1	2	Province Orientale	Urban	Male	Catholic	Married (monogamous)	Public	30-34	4			2756812	175200	48000	815936	369200	0	0	0	8000	0	0	229360	4402508	Matched (3)	0	0	6	Yes	Yes	22	Public	Catholic
4870	1	Pool de Mata	3	Kongo Centra	Rural	Female	Father or mother	Congolaise	Protestant	6	No	487001	48700102	2	4870	1	2	Bas-Congo	Rural	Male	Protestant	Single	Public	35-39	4	20000		2756812	175200	48000	815936	369200	0	0	0	8000	0	0	229360	4402508	Matched (3)	0	0	6	No	No	60	Public	Protestant
820	1	Pool de Band	39	Kwilu	Urban	Male	Child of the household head	Congolaise	Other Christian	6	No	82001	8200102	2	820	1	2	Bandundu	Urban	Female	Catholic	Widowed	Informal non-agricultural	55-59	7	30000		2756812	175200	48000	815936	369200	0	0	0	8000	0	0	229360	4402508	Matched (3)	0	0	6	No	No	33	Informal non-agricultural	Other Christian
460	1	Kinshasa Cluster	34	Kinshasa	Urban	Male	Chef de ménage	Congolaise	Protestant	6	No	46001	4600101	1	460	1	1	Kinshasa	Urban	Male	Protestant	Married (monogamous)	Informal non-agricultural	40-44	7	140192.3956		2756812	175200	48000	815936	369200	0	0	0	8000	0	0	229360	4402508	Matched (3)	0	0	6	No	No	44	Informal non-agricultural	Protestant
620	1	Pool de Boma	9	Kongo Centra	Urban	Male	Chef de ménage	Congolaise	Catholic	6	No	62001	6200101	1	620	1	1	Bas-Congo	Urban	Male	Catholic	Married (monogamous)	Chomeurs	60-64	3			2756812	175200	48000	815936	369200	0	0	0	8000	0	0	229360	4402508	Matched (3)	0	0	6	No	No	60	Chomeurs	Catholic
3611	1	Isiro Cluster	3	Haut-Uele	Township	Female	Chef de ménage	Congolaise	Catholic	6	No	361101	36110101	1	3611	1	1	Province Orientale	Urban	Female	Catholic	Cohabiting	Informal non-agricultural	30-34	6	30000	20000	2756812	175200	48000	815936	369200	0	0	0	8000	0	0	229360	4402508	Matched (3)	0	0	6	No	No	31	Informal non-agricultural	Catholic
3300	1	Pool de Gbad	9	Nord-Ubangi	Township	Male	Child of the household head	Congolaise	Other Christian	6	Yes	330001	33000114	14	3300	1	14	Equateur	Urban	Male	Catholic	Married (monogamous)	Informal agricultural	45-49	14			2756812	175200	48000	815936	369200	0	0	0	8000	0	0	229360	4402508	Matched (3)	0	0	6	Yes	Yes	10	Informal agricultural	Other Christian
9720	1	Pool de Mwek	2	Kasai	Rural	Female	Spouse of the household head	Congolaise	Protestant	6	No	972001	97200102	2	9720	1	2	Kasaî occidental	Rural	Male	Protestant	Married (monogamous)	Informal agricultural	30-34	6	4000		2756812	175200	48000	815936	369200	0	0	0	8000	0	0	229360	4402508	Matched (3)	0	0	6	No	No	26	Informal agricultural	Protestant
560	1	Pool de Boma	82	Kongo Centra	Urban	Male	Child of the household head	Congolaise	Other Christian	6	Yes	56001	5600105	5	560	1	5	Bas-Congo	Urban	Male	Other Christian	Married (monogamous)	Public	40-44	8			2756812	175200	48000	815936	369200	0	0	0	8000	0	0	229360	4402508	Matched (3)	0	0	6	Yes	Yes	8	Public	Other Christian
3480	1	Pool de Bas	19	Tshopo	Township	Male	Child of the household head	Congolaise	Catholic	6	Yes	348001	34800105	5	3480	1	5	Province Orientale	Urban	Male	Catholic	Married (monogamous)	Public	60-64	6			2756812	175200	48000	815936	369200	0	0	0	8000	0	0	229360	4402508	Matched (3)	0	0	6	Yes	Yes	10	Public	Catholic
4510	1	Mbuji-Mayi Cluster	999	Kasai-Orient	Township	Male	Chef de ménage	Congolaise	Catholic	6	No	451001	45100101	1	4510	1	1	Kasaî Oriental	Urban	Male	Catholic	Single	Public	20-24	5	25000		2756812	175200	48000	815936	369200	0	0	0	8000	0	0	229360	4402508	Matched (3)	0	0	6	No	No	23	Public	Catholic
1150	1	Pool de Zong	116	Sud-Ubangi	Urban	Female	Child of the household head	Congolaise	Protestant	6	Yes	115001	11500103	3	1150	1	3	Equateur	Urban	Male	Catholic	Married (polygamous)	Public	40-44	5			2756812	175200	48000	815936	369200	0	0	0	8000	0	0	229360	4402508	Matched (3)	0	0	6	Yes	Yes	13	Public	Protestant
8920	1	Mbuji-Mayi Cluster	999	Kasai-Orient	Rural	Male	Child of the household head	Congolaise	Catholic	6	No	892001	89200103	3	8920	1	3	Kasaî Oriental	Rural	Male	Catholic	Married (monogamous)	Informal agricultural	45-49	5	44731.8468		2756812	175200	48000	815936	369200	0	0	0	8000	0	0	229360	4402508	Matched (3)	0	0	6	No	No	21	Informal agricultural	Catholic
4760	1	Pool de Kana	999	Kasai-Centra	Township	Female	Spouse of the household head	Congolaise	Other Christian	6	No	476001	47600102	2	4760	1	2	Kasaî occidental	Urban	Male	Other Christian	Married (monogamous)	Public	60-64	15	9751.902676		2756812	175200	48000	815936	369200	0	0	0	8000	0	0	229360	4402508	Matched (3)	0	0	6	No	No	54	Public	Other Christian
190	1	Kinshasa Cluster	2	Kinshasa	Urban	Female	Child of the household head	Congolaise	Other Christian	6	No	19001	1900104	4	190	1	4	Kinshasa	Urban	Male	Catholic	Married (monogamous)	Public	45-49	9			2756812	175200	48000	815936	369200	0	0	0	8000	0	0	229360	4402508	Matched (3)	0	0	6	No	No	22	Public	Other Christian
750	1	Pool de Mata	55	Kongo Centra	Urban	Male	Child of the household head	Congolaise	Protestant	6	No	75001	7500103	3	750	1	3	Bas-Congo	Urban	Male	Catholic	Married (monogamous)	Public	60-64	7			1406820	0	0	0	2440	0	0	0	0	0	0	42780	1452040	Matched (3)	0	0	6	No	No	28	Public	Protestant
4480	1	Mbuji-Mayi Cluster	2	Kasai-Orient	Township	Female	Chef de ménage	Congolaise	Catholic	6	No	448001	44800101	1	4480	1	1	Kasaî Oriental	Urban	Female	Catholic	Widowed	Informal agricultural	60-64	7	12283.39348		2756812	175200	48000	815936	369200	0	0	0	8000	0	0	229360	4402508	Matched (3)	0	0	6	No	No	64	Informal agricultural	Catholic
8950	1	Mbuji-Mayi Cluster	999	Kasai-Orient	Rural	Male	Chef de ménage	Congolaise	Other Christian	6	No	895001	89500101	1	8950	1	1	Kasaî Oriental	Rural	Male	Other Christian	Married (monogamous)	Informal agricultural	30-34	6	15000		2756812	175200	48000	815936	369200	0	0	0	8000	0	0	229360	4402508	Matched (3)	0	0	6	No	No	30	Informal agricultural	Other Christian
2720	1	Pool de Kana	999	Kasai-Centra	Urban	Female	Child of the household head	Congolaise	Protestant	6	Yes	272001	27200104	4	2720	1	4	Kasaî occidental	Urban	Male	Protestant	Married (monogamous)	Informal non-agricultural	45-49	6	8081.897718		2756812	175200	48000	815936	369200	0	0	0	8000	0	0	229360	4402508	Matched (3)	0	0	6	Yes	Yes	16	Informal non-agricultural	Protestant
6580	1	Pool de Boen	1	Tshuapa	Rural	Male	Chef de ménage	Congolaise	Other Christian	6	No	658001	65800101	1	6580	1	1	Equateur	Rural	Male	Other Christian	Married (monogamous)	Public	30-34	7	45000		2756812	175200	48000	815936	369200	0	0	0	8000	0	0	229360	4402508	Matched (3)	0	0	6	No	No	34	Public	Other Christian
3060	1	Pool de Idio	25	Kwilu	Township	Male	Child of the household head	Congolaise	Other Christian	6	Yes	306001	30600104	4	3060	1	4	Bandundu	Urban	Female	Catholic	Widowed	Informal agricultural	50-54	5			2756812	175200	48000	815936	369200	0	0	0	8000	0	0	229360	4402508	Matched (3)	0	0	6	Yes	Yes	22	Informal agricultural	Other Christian
1110	1	Pool de Mban	1	Equateur	Urban	Female	Child of the household head	Congolaise	Catholic	6	Yes	111001	11100104	4	1110	1	4	Equateur	Urban	Male	Catholic	Married (monogamous)	Inactive	40-44	5			2756812	175200	48000	815936	369200	0	0	0	8000	0	0	229360	4402508	Matched (3)	0	0	6	Yes	Yes	8	Inactive	Catholic
160	1	Kinshasa Cluster	13	Kinshasa	Urban	Male	Child of the household head	Congolaise	Catholic	6	No	16001	1600104	4	160	1	4	Kinshasa	Urban	Male	Catholic	Married (monogamous)	Inactive	70-74	5	104114.2581		2756812	175200	48000	815936	369200	0	0	0	8000	0	0	229360	4402508	Matched (3)	0	0	6	No	No	32	Inactive	Catholic
6560	1	Pool de Boen	1	Tshuapa	Rural	Male	Child of the household head	Congolaise	Other religion	6	Yes	656001	65600104	4	6560	1	4	Equateur	Rural	Male	Other religion	Married (monogamous)	Public	55-59	5			2756812	175200	48000	815936	369200	0	0	0	8000	0	0	229360	4402508	Matched (3)	0	0	6	Yes	Yes	13	Public	Other religion
2210	1	Pool de Lika	999	Haut-Katanga	Urban	Male	Chef de ménage	Congolaise	Other Christian	6	No	221001	22100101	1	2210	1	1	Katanga	Urban	Male	Other Christian	Married (monogamous)	Chomeurs	50-54	3			2756812	175200	48000	815936	369200	0	0	0	8000	0	0	229360	4402508	Matched (3)	0	0	6	No	No	50	Chomeurs	Other Christian
5810	1	Pool de Basa	5	Equateur	Rural	Male	Child of the household head	Congolaise	Other Christian	6	Yes	581001	58100109	9	5810	1	9	Equateur	Rural	Male	Other Christian	Married (monogamous)	Informal agricultural	50-54	10			2756812	175200	48000	815936	369200	0	0	0	8000	0	0	229360	4402508	Matched (3)	0	0	6	Yes	Yes	8	Informal agricultural	Other Christian
2120	1	Pool de Kolw	999	Lualaba	Urban	Male	Chef de ménage	Congolaise	Catholic	6	No	212001	21200101	1	2120	1	1	Katanga	Urban	Male	Catholic	Single	Informal non-agricultural	25-29	2	50000		2756812	175200	48000	815936	369200	0	0	0	8000	0	0	229360	4402508	Matched (3)	0	0	6	No	No	27	Informal non-agricultural	Catholic
4791	1	Pool de Mwek	12	Kasai	Township	Female	Child of the household head	Congolaise	Other Christian	6	Yes	479101	47910104	4	4791	1	4	Kasaî occidental	Urban	Female	Other Christian	Married (polygamous)	Informal non-agricultural	30-34	10			511180	24400	0	177543	4880	0	0	0	0	0	0	73200	791203	Matched (3)	0	0	6	Yes	Yes	12	Informal non-agricultural	Other Christian
2990	1	Pool de Band	9	Kwilu	Township	Female	Child of the household head	Congolaise	Other religion	6	Yes	299001	29900106	6	2990	1	6	Bandundu	Urban	Male	Other religion	Married (monogamous)	Public	45-49	6			2756812	175200	48000	815936	369200	0	0	0	8000	0	0	229360	4402508	Matched (3)	0	0	6	Yes	Yes	8	Public	Other religion
4810	1	Pool de Mwek	29	Kasai	Township	Female	Spouse of the household head	Congolaise	Other Christian	6	No	481001	48100102	2	4810	1	2	Kasaî occidental	Urban	Male	Other Christian	Married (monogamous)	Public	30-34	4	56000		2756812	175200	48000	815936	369200	0	0	0	8000	0	0	229360	4402508	Matched (3)	0	0	6	No	No	26	Public	Other Christian
7160	1	Isiro Cluster	2	Haut-Uele	Rural	Male	Child of the household head	Congolaise	Protestant	6	Yes	716001	71600103	3	7160	1	3	Province Orientale	Rural	Male	Protestant	Married (monogamous)	Informal agricultural	50-54	9			225627	26400	0	204651	7800	0	10400	0	0	0	0	0	474878	Matched (3)	0	0	6	Yes	Yes	19	Informal agricultural	Protestant
4770	1	Pool de Kana	999	Kasai-Centra	Township	Male	Child of the household head	Congolaise	Other Christian	6	Yes	477001	47700103	3	4770	1	3	Kasaî occidental	Urban	Male	Other Christian	Married (monogamous)	Inactive	45-49	9			2756812	175200	48000	815936	369200	0	0	0	8000	0	0	229360	4402508	Matched (3)	0	0	6	Yes	Yes	14	Inactive	Other Christian
560	1	Pool de Boma	82	Kongo Centra	Urban	Male	Child of the household head	Congolaise	Other Christian	6	Yes	56001	5600103	3	560	1	3	Bas-Congo	Urban	Male	Other Christian	Married (monogamous)	Public	40-44	8			2756812	175200	48000	815936	369200	0	0	0	8000	0	0	229360	4402508	Matched (3)	0	0	6	Yes	Yes	17	Public	Other Christian
3414	1	Pool de Boku	2	Tshuapa	Township	Male	Child of the household head	Congolaise	Other Christian	6	Yes	341401	34140104	4	3414	1	4	Equateur	Urban	Male	Other Christian	Married (monogamous)	Informal non-agricultural	50-54	6	5000		2756812	175200	48000	815936	369200	0	0	0	8000	0	0	229360	4402508	Matched (3)	0	0	6	Yes	Yes	24	Informal non-agricultural	Other Christian
7350	1	Pool de Buta	4	Bas-Uele	Rural	Female	Spouse of the household head	Congolaise	Catholic	6	No	735001	73500102	2	7350	1	2	Province Orientale	Rural	Male	Catholic	Married (monogamous)	Informal non-agricultural	40-44	3	30000		2756812	175200	48000	815936	369200	0	0	0	8000	0	0	229360	4402508	Matched (3)	0	0	6	No	No	38	Informal non-agricultural	Catholic
4890	1	Pool de Mata	3	Kongo Centra	Rural	Male	Child of the household head	Congolaise	Protestant	6	Yes	489001	48900104	4	4890	1	4	Bas-Congo	Rural	Male	Catholic	Married (monogamous)	Informal agricultural	45-49	10			860100	0	0	826798	0	0	0	0	2440	0	0	0	1689338	Matched (3)	0	0	6	Yes	Yes	15	Informal agricultural	Protestant
3570	1	Pool de Bun	356	Ituri	Township	Male	Chef de ménage	Congolaise	Catholic	6	No	357001	35700101	1	3570	1	1	Province Orientale	Urban	Male	Catholic	Married (monogamous)	Public	30-34	2	135000		2756812	175200	48000	815936	369200	0	0	0	8000	0	0	229360	4402508	Matched (3)	0	0	6	No	No	33	Public	Catholic
3401	1	Pool de Lisa	24	Mongala	Township	Male	Other parent	Congolaise	Catholic	6	No	340101	34010102	2	3401	1	2	Equateur	Urban	Female	Catholic	Widowed	Inactive	70-74	5			2756812	175200	48000	815936	369200	0	0	0	8000	0	0	229360	4402508	Matched (3)	0	0	6	No	No	18	Inactive	Catholic
6810	1	Pool de Bas	2	Tshopo	Rural	Female	Spouse of the household head	Congolaise	Protestant	6	No	681001	68100102	2	6810	1	2	Province Orientale	Rural	Male	Protestant	Cohabiting	Informal non-agricultural	20-24	3	13485.4125		2756812	175200	48000	815936	369200	0	0	0	8000	0	0	229360	4402508	Matched (3)	0	0	6	No	No	30	Informal non-agricultural	Protestant
4690	1	Pool de Mwen	999	Lomami	Township	Male	Chef de ménage	Congolaise	Other religion	6	No	469001	46900101	1	4690	1	1	Kasaî Oriental	Urban	Male	Other religion	Married (monogamous)	Public	35-39	9	49457.18427	70000	2756812	175200	48000	815936	369200	0	0	0	8000	0	0	229360	4402508	Matched (3)	0	0	6	No	No	39	Public	Other religion
1550	1	Pool de Beni	2	Nord-Kivu	Urban	Male	Child of the household head	Congolaise	Protestant	6	Yes	155001	15500104	4	1550	1	4	Nord-Kivu	Urban	Male	Protestant	Cohabiting	Informal agricultural	35-39	4			698450	0	0	328672	15250	0	0	61000	0	0	0	82350	1185722	Matched (3)	0	0	6	Yes	Yes	5	Informal agricultural	Protestant
8810	1	Pool de Kase	999	Haut-Katanga	Rural	Male	Child of the household head	Congolaise	Protestant	6	Yes	881001	88100104	4	8810	1	4	Katanga	Rural	Male	Protestant	Married (monogamous)	Informal agricultural	35-39	5			435540	0	2800	144549	7320	0	0	0	5200	91000	0	20440	706849	Matched (3)	12.87404	12.87404	6	Yes	Yes	11	Informal agricultural	Protestant
9360	1	Pool de Mwen	999	Lomami	Rural	Female	Child of the household head	Congolaise	Protestant	6	No	936001	93600103	3	9360	1	3	Kasaî Oriental	Rural	Male	Protestant	Married (monogamous)	Public	60-64	7	10000		2756812	175200	48000	815936	369200	0	0	0	8000	0	0	229360	4402508	Matched (3)	0	0	6	No	No	25	Public	Protestant
8690	1	Pool de Lika	999	Haut-Katanga	Rural	Male	Child of the household head	Congolaise	Catholic	6	Yes	869001	86900110	10	8690	1	10	Katanga	Rural	Male	Other religion	Married (monogamous)	Informal agricultural	45-49	9			2756812	175200	48000	815936	369200	0	0	0	8000	0	0	229360	4402508	Matched (3)	0	0	6	Yes	Yes	20	Informal agricultural	Catholic
760	1	Pool de Mata	22	Kongo Centra	Urban	Female	Child of the household head	Congolaise	Other Christian	6	Yes	76001	7600106	6	760	1	6	Bas-Congo	Urban	Male	Other Christian	Married (monogamous)	Inactive	50-54	6			2756812	175200	48000	815936	369200	0	0	0	8000	0	0	229360	4402508	Matched (3)	0	0	6	Yes	Yes	9	Inactive	Other Christian
2310	1	Pool de Lubu	54	Haut-Katanga	Urban	Male	Chef de ménage	Congolaise	Catholic	6	No	231001	23100101	1	2310	1	1	Katanga	Urban	Male	Catholic	Married (monogamous)	Informal non-agricultural	60-64	11	270000		1562000	78000	1076000	377636	382000	0	0	114000	260000	0	0	186000	4035636	Matched (3)	0	0	6	No	No	61	Informal non-agricultural	Catholic
9790	1	Pool de Mwek	5	Kasai	Rural	Female	Spouse of the household head	Congolaise	Other Christian	6	No	979001	97900102	2	9790	1	2	Kasaî occidental	Rural	Male	Other Christian	Married (polygamous)	Informal agricultural	40-44	9	9950.419928		2756812	175200	48000	815936	369200	0	0	0	8000	0	0	229360	4402508	Matched (3)	0	0	6	No	No	36	Informal agricultural	Other Christian
3300	1	Pool de Gbad	9	Nord-Ubangi	Township	Female	Spouse of the household head	Congolaise	Other Christian	6	No	330001	33000102	2	3300	1	2	Equateur	Urban	Male	Catholic	Married (monogamous)	Informal agricultural	45-49	14	139553.2426		2756812	175200	48000	815936	369200	0	0	0	8000	0	0	229360	4402508	Matched (3)	0	0	6	No	No	47	Informal agricultural	Other Christian
3430	1	Pool de Bas	2	Tshopo	Township	Female	Child of the household head	Congolaise	Kimbanguist	6	No	343001	34300103	3	3430	1	3	Province Orientale	Urban	Male	Catholic	Married (monogamous)	Informal agricultural	55-59	7			2756812	175200	48000	815936	369200	0	0	0	8000	0	0	229360	4402508	Matched (3)	0	0	6	No	No	20	Informal agricultural	Kimbanguist
2120	1	Pool de Kolw	999	Lualaba	Urban	Male	Other person	Congolaise	Catholic	6	Yes	212001	21200102	2	2120	1	2	Katanga	Urban	Male	Catholic	Single	Informal non-agricultural	25-29	2			2756812	175200	48000	815936	369200	0	0	0	8000	0	0	229360	4402508	Matched (3)	0	0	6	Yes	Yes	21	Informal non-agricultural	Catholic
4760	1	Pool de Kana	999	Kasai-Centra	Township	Male	Child of the household head	Congolaise	Other Christian	6	Yes	476001	47600115	15	4760	1	15	Kasaî occidental	Urban	Male	Other Christian	Married (monogamous)	Public	60-64	15			2756812	175200	48000	815936	369200	0	0	0	8000	0	0	229360	4402508	Matched (3)	0	0	6	Yes	Yes	24	Public	Other Christian
1830	1	Pool de Buka	42	Sud-Kivu	Urban	Male	Chef de ménage	Congolaise	Protestant	6	No	183001	18300101	1	1830	1	1	Sud-Kivu	Urban	Male	Protestant	Divorced	Informal non-agricultural	35-39	8	30000		2756812	175200	48000	815936	369200	0	0	0	8000	0	0	229360	4402508	Matched (3)	0	0	6	No	No	38	Informal non-agricultural	Protestant
9240	1	Pool de Lusa	999	Sankuru	Rural	Female	Child of the household head	Congolaise	Protestant	6	No	924001	92400102	2	9240	1	2	Kasaî Oriental	Rural	Female	Protestant	Widowed	Informal agricultural	40-44	9			2756812	175200	48000	815936	369200	0	0	0	8000	0	0	229360	4402508	Matched (3)	0	0	6	No	No	18	Informal agricultural	Protestant
4870	1	Pool de Mata	3	Kongo Centra	Rural	Male	Chef de ménage	Congolaise	Protestant	6	No	487001	48700101	1	4870	1	1	Bas-Congo	Rural	Male	Protestant	Single	Public	35-39	4	58000		2756812	175200	48000	815936	369200	0	0	0	8000	0	0	229360	4402508	Matched (3)	0	0	6	No	No	35	Public	Protestant
8180	1	Pool de Kolw	999	Lualaba	Rural	Male	Child of the household head	Congolaise	Catholic	6	No	818001	81800103	3	8180	1	3	Katanga	Rural	Female	Catholic	Married (polygamous)	Informal agricultural	40-44	6			2808440	0	0	172416	43920	0	0	0	131760	379200	0	0	3535736	Matched (3)	10.72478	10.72478	6	No	No	11	Informal agricultural	Catholic
8690	1	Pool de Lika	999	Haut-Katanga	Rural	Female	Child of the household head	Congolaise	Other religion	6	Yes	869001	86900105	5	8690	1	5	Katanga	Rural	Male	Other religion	Married (monogamous)	Informal agricultural	45-49	9			2756812	175200	48000	815936	369200	0	0	0	8000	0	0	229360	4402508	Matched (3)	0	0	6	Yes	Yes	9	Informal agricultural	Other religion
1100	1	Pool de Mban	4	Equateur	Urban	Female	Spouse of the household head	Congolaise	Catholic	6	No	110001	11000102	2	1100	1	2	Equateur	Urban	Male	Protestant	Married (monogamous)	Informal non-agricultural	45-49	12	46542.98127		2756812	175200	48000	815936	369200	0	0	0	8000	0	0	229360	4402508	Matched (3)	0	0	6	No	No	44	Informal non-agricultural	Catholic
8810	1	Pool de Kase	999	Haut-Katanga	Rural	Male	Chef de ménage	Congolaise	Protestant	6	No	881001	88100101	1	8810	1	1	Katanga	Rural	Male	Protestant	Married (monogamous)	Informal agricultural	35-39	5	49133.6062		2756812	175200	48000	815936	369200	0	0	0	8000	0	0	229360	4402508	Matched (3)	0	0	6	No	No	37	Informal agricultural	Protestant
9530	1	Pool de Kana	999	Kasai-Centra	Rural	Male	Child of the household head	Congolaise	Other Christian	6	Yes	953001	95300103	3	9530	1	3	Kasaî occidental	Rural	Male	Other Christian	Married (polygamous)	Informal agricultural	40-44	8			2756812	175200	48000	815936	369200	0	0	0	8000	0	0	229360	4402508	Matched (3)	0	0	6	Yes	Yes	14	Informal agricultural	Other Christian
1140	1	Pool de Mban	2	Equateur	Urban	Male	Other person	Congolaise	Other Christian	6	No	114001	11400103	3	1140	1	3	Equateur	Urban	Male	Other Christian	Single	Inactive	30-34	4	40000		2756812	175200	48000	815936	369200	0	0	0	8000	0	0	229360	4402508	Matched (3)	0	0	6	No	No	27	Inactive	Other Christian
6020	1	Pool de Geme	9	Sud-Ubangi	Rural	Male	Chef de ménage	Congolaise	Protestant	6	No	602001	60200101	1	6020	1	1	Equateur	Rural	Male	Protestant	Married (monogamous)	Informal agricultural	30-34	6	19000		2756812	175200	48000	815936	369200	0	0	0	8000	0	0	229360	4402508	Matched (3)	0	0	6	No	No	32	Informal agricultural	Protestant
1600	1	Pool de Beni	2	Nord-Kivu	Urban	Female	Chef de ménage	Congolaise	Musulmane	6	No	160001	16000101	1	1600	1	1	Nord-Kivu	Urban	Female	Musulmane	Widowed	Chomeurs	30-34	3			551180	29280	0	97096	0	9760	0	0	0	0	0	0	687316	Matched (3)	0	0	6	No	No	30	Chomeurs	Musulmane
9850	1	Pool de Mwek	20	Kasai	Rural	Male	Chef de ménage	Congolaise	Other Christian	6	No	985001	98500101	1	9850	1	1	Kasaî occidental	Rural	Male	Other Christian	Married (monogamous)	Informal agricultural	35-39	9	15000	15000	2756812	175200	48000	815936	369200	0	0	0	8000	0	0	229360	4402508	Matched (3)	0	0	6	No	No	36	Informal agricultural	Other Christian
6220	1	Pool de Gbad	19	Nord-Ubangi	Rural	Female	Spouse of the household head	Congolaise	Catholic	6	No	622001	62200104	4	6220	1	4	Equateur	Rural	Male	Catholic	Married (polygamous)	Public	40-44	13	20000		2756812	175200	48000	815936	369200	0	0	0	8000	0	0	229360	4402508	Matched (3)	0	0	6	No	No	32	Public	Catholic
3185	1	Pool de Mban	10	Equateur	Township	Male	Chef de ménage	Congolaise	Other Christian	6	No	318501	31850101	1	3185	1	1	Equateur	Urban	Male	Other Christian	Married (monogamous)	Informal agricultural	35-39	6	47554.07548		2756812	175200	48000	815936	369200	0	0	0	8000	0	0	229360	4402508	Matched (3)	0	0	6	No	No	37	Informal agricultural	Other Christian
750	1	Pool de Mata	55	Kongo Centra	Urban	Male	Child of the household head	Congolaise	Protestant	6	Yes	75001	7500106	6	750	1	6	Bas-Congo	Urban	Male	Catholic	Married (monogamous)	Public	60-64	7			416264	7320	0	29280	9760	0	0	0	0	0	46360	1220	510204	Matched (3)	0	0	6	Yes	Yes	17	Public	Protestant
9020	1	Mbuji-Mayi Cluster	999	Kasai-Orient	Rural	Female	Child of the household head	Congolaise	Catholic	6	No	902001	90200103	3	9020	1	3	Kasaî Oriental	Rural	Male	Protestant	Married (polygamous)	Informal agricultural	55-59	7	11000		2756812	175200	48000	815936	369200	0	0	0	8000	0	0	229360	4402508	Matched (3)	0	0	6	No	No	24	Informal agricultural	Catholic
2110	1	Pool de Kolw	999	Lualaba	Urban	Male	Chef de ménage	Congolaise	Other religion	6	No	211001	21100101	1	2110	1	1	Katanga	Urban	Male	Other religion	Married (polygamous)	Formal private sector	55-59	2	350000	17385.41445	2766040	50020	42000	275880	315200	78000	390000	91215	86500	89000	224380	132600	4540835	Matched (3)	1.959992	1.959992	6	No	No	56	Formal private sector	Other religion
490	1	Kinshasa Cluster	19	Kinshasa	Urban	Male	Chef de ménage	Congolaise	Protestant	6	No	49001	4900101	1	490	1	1	Kinshasa	Urban	Male	Protestant	Married (monogamous)	Public	35-39	9	78000		2756812	175200	48000	815936	369200	0	0	0	8000	0	0	229360	4402508	Matched (3)	0	0	6	No	No	36	Public	Protestant
3570	1	Pool de Bun	356	Ituri	Township	Female	Spouse of the household head	Congolaise	Musulmane	6	No	357001	35700102	2	3570	1	2	Province Orientale	Urban	Male	Catholic	Married (monogamous)	Public	30-34	2	45961.63008		2756812	175200	48000	815936	369200	0	0	0	8000	0	0	229360	4402508	Matched (3)	0	0	6	No	No	27	Public	Musulmane
8030	1	Pool de Pun	1	Maniema	Rural	Male	Child of the household head	Congolaise	Protestant	6	Yes	803001	80300107	7	8030	1	7	Maniema	Rural	Male	Protestant	Married (monogamous)	Informal agricultural	65-69	15			2756812	175200	48000	815936	369200	0	0	0	8000	0	0	229360	4402508	Matched (3)	0	0	6	Yes	Yes	28	Informal agricultural	Protestant
1250	1	Pool de Gbad	125	Nord-Ubangi	Urban	Male	Child of the household head	Congolaise	Catholic	6	Yes	125001	12500106	6	1250	1	6	Equateur	Urban	Male	Catholic	Married (monogamous)	Informal agricultural	65-69	8			2756812	175200	48000	815936	369200	0	0	0	8000	0	0	229360	4402508	Matched (3)	0	0	6	Yes	Yes	15	Informal agricultural	Catholic
3600	1	Pool de Bun	39	Ituri	Township	Male	Chef de ménage	Congolaise	Catholic	6	No	360001	36000101	1	3600	1	1	Province Orientale	Urban	Male	Catholic	Married (monogamous)	Chomeurs	45-49	5			2756812	175200	48000	815936	369200	0	0	0	8000	0	0	229360	4402508	Matched (3)	0	0	6	No	No	48	Chomeurs	Catholic
9010	1	Mbuji-Mayi Cluster	999	Kasai-Orient	Rural	Male	Child of the household head	Congolaise	Other Christian	6	Yes	901001	90100106	6	9010	1	6	Kasaî Oriental	Rural	Male	Other Christian	Married (monogamous)	Informal agricultural	40-44	12	7656.322567		2756812	175200	48000	815936	369200	0	0	0	8000	0	0	229360	4402508	Matched (3)	0	0	6	Yes	Yes	17	Informal agricultural	Other Christian
5750	1	Pool de Basa	56	Equateur	Rural	Male	Child of the household head	Congolaise	Other Christian	6	Yes	575001	57500106	6	5750	1	6	Equateur	Rural	Male	Other Christian	Married (monogamous)	Informal non-agricultural	55-59	12			223260	2440	0	3660	6000	0	0	0	0	0	0	2440	237800	Matched (3)	0	0	6	Yes	Yes	11	Informal non-agricultural	Other Christian
1590	1	Pool de Beni	2	Nord-Kivu	Urban	Female	Child of the household head	Congolaise	Catholic	6	Yes	159001	15900103	3	1590	1	3	Nord-Kivu	Urban	Male	Catholic	Married (monogamous)	Public	30-34	4			1178520	0	0	36600	24400	0	0	0	4880	0	0	0	1244400	Matched (3)	0	0	6	Yes	Yes	8	Public	Catholic
190	1	Kinshasa Cluster	2	Kinshasa	Urban	Male	Child of the household head	Congolaise	Other Christian	6	Yes	19001	1900103	3	190	1	3	Kinshasa	Urban	Male	Catholic	Married (monogamous)	Public	45-49	9			2756812	175200	48000	815936	369200	0	0	0	8000	0	0	229360	4402508	Matched (3)	0	0	6	Yes	Yes	15	Public	Other Christian
4830	1	Pool de Mwek	29	Kasai	Township	Female	Child of the household head	Congolaise	Other Christian	6	Yes	483001	48300107	7	4830	1	7	Kasaî occidental	Urban	Male	Catholic	Married (monogamous)	Informal non-agricultural	35-39	10			2756812	175200	48000	815936	369200	0	0	0	8000	0	0	229360	4402508	Matched (3)	0	0	6	Yes	Yes	10	Informal non-agricultural	Other Christian
1420	1	Kisangani Cluster	18	Tshopo	Urban	Female	Spouse of the household head	Congolaise	Catholic	6	No	142001	14200102	2	1420	1	2	Province Orientale	Urban	Male	Other Christian	Married (monogamous)	Public	35-39	7	12991.25325		480023	0	0	0	0	0	0	0	0	0	0	0	480023	Matched (3)	0	0	6	No	No	32	Public	Catholic
2800	1	Pool de Tshi	999	Kasai	Urban	Female	Spouse of the household head	Congolaise	Other Christian	6	No	280001	28000102	2	2800	1	2	Kasaî occidental	Urban	Male	Other Christian	Married (monogamous)	Chomeurs	30-34	3	45941.12676		2756812	175200	48000	815936	369200	0	0	0	8000	0	0	229360	4402508	Matched (3)	0	0	6	No	No	25	Chomeurs	Other Christian
5900	1	Pool de Geme	6	Sud-Ubangi	Rural	Male	Chef de ménage	Congolaise	Catholic	6	No	590001	59000101	1	5900	1	1	Equateur	Rural	Male	Catholic	Married (monogamous)	Informal agricultural	50-54	3	15894.1518		2756812	175200	48000	815936	369200	0	0	0	8000	0	0	229360	4402508	Matched (3)	0	0	6	No	No	52	Informal agricultural	Catholic
190	1	Kinshasa Cluster	2	Kinshasa	Urban	Female	Other parent	Congolaise	Other Christian	6	No	19001	1900105	5	190	1	5	Kinshasa	Urban	Male	Catholic	Married (monogamous)	Public	45-49	9			2756812	175200	48000	815936	369200	0	0	0	8000	0	0	229360	4402508	Matched (3)	0	0	6	No	No	34	Public	Other Christian
8620	1	Pool de Kale	999	Tanganyka	Rural	Male	Chef de ménage	Congolaise	Other Christian	6	No	862001	86200101	1	8620	1	1	Katanga	Rural	Male	Other Christian	Married (monogamous)	Informal agricultural	.a	5			2756812	175200	48000	815936	369200	0	0	0	8000	0	0	229360	4402508	Matched (3)	0	0	6	No	No	NSP	Informal agricultural	Other Christian
3390	1	Pool de Lisa	37	Mongala	Township	Male	Child of the household head	Congolaise	Other Christian	6	Yes	339001	33900104	4	3390	1	4	Equateur	Urban	Male	Other Christian	Married (monogamous)	Informal non-agricultural	50-54	6			2756812	175200	48000	815936	369200	0	0	0	8000	0	0	229360	4402508	Matched (3)	0	0	6	Yes	Yes	15	Informal non-agricultural	Other Christian
930	1	Pool de Kikw	35	Kwilu	Urban	Female	Spouse of the household head	Congolaise	Other Christian	6	No	93001	9300102	2	930	1	2	Bandundu	Urban	Male	Catholic	Married (monogamous)	Informal non-agricultural	35-39	6	46200.29892		2756812	175200	48000	815936	369200	0	0	0	8000	0	0	229360	4402508	Matched (3)	0	0	6	No	No	31	Informal non-agricultural	Other Christian
3270	1	Pool de Geme	15	Sud-Ubangi	Township	Female	Child of the household head	Congolaise	Catholic	6	Yes	327001	32700105	5	3270	1	5	Equateur	Urban	Female	Catholic	Divorced	Informal non-agricultural	45-49	10			2756812	175200	48000	815936	369200	0	0	0	8000	0	0	229360	4402508	Matched (3)	0	0	6	Yes	Yes	17	Informal non-agricultural	Catholic
700	1	Pool de Mata	9	Kongo Centra	Urban	Female	Child of the household head	Congolaise	Catholic	6	Yes	70001	7000106	6	700	1	6	Bas-Congo	Urban	Male	Catholic	Married (monogamous)	Formal private sector	50-54	8			2756812	175200	48000	815936	369200	0	0	0	8000	0	0	229360	4402508	Matched (3)	0	0	6	Yes	Yes	16	Formal private sector	Catholic
2100	1	Pool de Kolw	999	Lualaba	Urban	Male	Child of the household head	Congolaise	Other Christian	6	Yes	210001	21000107	7	2100	1	7	Katanga	Urban	Male	Other Christian	Married (monogamous)	Formal private sector	55-59	8			2756812	175200	48000	815936	369200	0	0	0	8000	0	0	229360	4402508	Matched (3)	0	0	6	Yes	Yes	16	Formal private sector	Other Christian
910	1	Pool de Kikw	4	Kwilu	Urban	Female	Other parent	Congolaise	Other Christian	6	No	91001	9100102	2	910	1	2	Bandundu	Urban	Female	Protestant	Single	Informal non-agricultural	35-39	6			2756812	175200	48000	815936	369200	0	0	0	8000	0	0	229360	4402508	Matched (3)	0	0	6	No	No	29	Informal non-agricultural	Other Christian
8420	1	Pool de Kami	999	Haut-Lomami	Rural	Male	Chef de ménage	Congolaise	Other Christian	6	No	842001	84200101	1	8420	1	1	Katanga	Rural	Male	Other Christian	Single	Informal agricultural	30-34	1	10000		2756812	175200	48000	815936	369200	0	0	0	8000	0	0	229360	4402508	Matched (3)	0	0	6	No	No	30	Informal agricultural	Other Christian
1000	1	Pool de Kikw	4	Kwilu	Urban	Female	Child of the household head	Congolaise	Protestant	6	Yes	100001	10000104	4	1000	1	4	Bandundu	Urban	Male	Protestant	Cohabiting	Public	45-49	7			2296980	119560	57000	166179	42080	2200	70000	186640	15000	43800	0	7320	3006759	Matched (3)	1.456718	1.456718	6	Yes	Yes	14	Public	Protestant
1080	1	Pool de Mban	3	Equateur	Urban	Male	Child of the household head	Congolaise	Other Christian	6	Yes	108001	10800105	5	1080	1	5	Equateur	Urban	Male	Other Christian	Married (monogamous)	Informal agricultural	55-59	7	44321.59405		2756812	175200	48000	815936	369200	0	0	0	8000	0	0	229360	4402508	Matched (3)	0	0	6	Yes	Yes	18	Informal agricultural	Other Christian
3530	1	Pool de Bun	5	Ituri	Township	Female	Child of the household head	Congolaise	Catholic	6	Yes	353001	35300103	3	3530	1	3	Province Orientale	Urban	Male	Catholic	Married (monogamous)	Formal private sector	65-69	10			2756812	175200	48000	815936	369200	0	0	0	8000	0	0	229360	4402508	Matched (3)	0	0	6	Yes	Yes	18	Formal private sector	Catholic
3300	1	Pool de Gbad	9	Nord-Ubangi	Township	Female	Child of the household head	Congolaise	Other Christian	6	Yes	330001	33000105	5	3300	1	5	Equateur	Urban	Male	Catholic	Married (monogamous)	Informal agricultural	45-49	14			2756812	175200	48000	815936	369200	0	0	0	8000	0	0	229360	4402508	Matched (3)	0	0	6	Yes	Yes	20	Informal agricultural	Other Christian
1010	1	Pool de Kikw	44	Kwilu	Urban	Male	Child of the household head	Congolaise	Catholic	6	Yes	101001	10100104	4	1010	1	4	Bandundu	Urban	Male	Catholic	Married (monogamous)	Formal private sector	40-44	7			451400	0	0	12200	2440	0	0	0	0	0	0	0	466040	Matched (3)	0	0	6	Yes	Yes	25	Formal private sector	Catholic
770	1	Pool de Mata	129	Kongo Centra	Urban	Female	Chef de ménage	Congolaise	Other Christian	6	No	77001	7700101	1	770	1	1	Bas-Congo	Urban	Female	Other Christian	Divorced	Informal non-agricultural	25-29	2	17169.31631		2756812	175200	48000	815936	369200	0	0	0	8000	0	0	229360	4402508	Matched (3)	0	0	6	No	No	29	Informal non-agricultural	Other Christian
7200	1	Isiro Cluster	1	Haut-Uele	Rural	Male	Chef de ménage	Congolaise	Catholic	6	No	720001	72000101	1	7200	1	1	Province Orientale	Rural	Male	Catholic	Cohabiting	Informal agricultural	30-34	4	12000		2756812	175200	48000	815936	369200	0	0	0	8000	0	0	229360	4402508	Matched (3)	0	0	6	No	No	32	Informal agricultural	Catholic
8260	1	Pool de Kasa	999	Lualaba	Rural	Male	Child of the household head	Congolaise	Catholic	6	Yes	826001	82600107	7	8260	1	7	Katanga	Rural	Male	Catholic	Married (monogamous)	Informal agricultural	50-54	11			2756812	175200	48000	815936	369200	0	0	0	8000	0	0	229360	4402508	Matched (3)	0	0	6	Yes	Yes	13	Informal agricultural	Catholic
9020	1	Mbuji-Mayi Cluster	999	Kasai-Orient	Rural	Male	Chef de ménage	Congolaise	Protestant	6	No	902001	90200101	1	9020	1	1	Kasaî Oriental	Rural	Male	Protestant	Married (polygamous)	Informal agricultural	55-59	7	20000		2756812	175200	48000	815936	369200	0	0	0	8000	0	0	229360	4402508	Matched (3)	0	0	6	No	No	59	Informal agricultural	Protestant
4130	1	Pool de Kami	999	Haut-Lomami	Township	Male	Chef de ménage	Congolaise	Protestant	6	No	413001	41300101	1	4130	1	1	Katanga	Urban	Male	Protestant	Married (monogamous)	Inactive	55-59	8			1324920	126880	0	172207	17080	9760	0	0	0	0	0	4880	1655727	Matched (3)	0	0	6	No	No	59	Inactive	Protestant
3760	1	Pool de Buta	9	Bas-Uele	Township	Male	Child of the household head	Congolaise	Protestant	6	Yes	376001	37600107	7	3760	1	7	Province Orientale	Urban	Male	Protestant	Married (monogamous)	Public	60-64	10			2756812	175200	48000	815936	369200	0	0	0	8000	0	0	229360	4402508	Matched (3)	0	0	6	Yes	Yes	14	Public	Protestant
1390	1	Kisangani Cluster	6	Tshopo	Urban	Male	Chef de ménage	Congolaise	Other Christian	6	No	139001	13900101	1	1390	1	1	Province Orientale	Urban	Male	Other Christian	Married (monogamous)	Public	65-69	4	400000		2756812	175200	48000	815936	369200	0	0	0	8000	0	0	229360	4402508	Matched (3)	0	0	6	No	No	67	Public	Other Christian
4350	1	Pool de Kase	999	Haut-Katanga	Township	Male	Child of the household head	Congolaise	Catholic	6	Yes	435001	43500103	3	4350	1	3	Katanga	Urban	Male	None	Married (monogamous)	Informal agricultural	55-59	3			2756812	175200	48000	815936	369200	0	0	0	8000	0	0	229360	4402508	Matched (3)	0	0	6	Yes	Yes	16	Informal agricultural	Catholic
4860	1	Pool de Mwek	48	Kasai	Township	Female	Spouse of the household head	Congolaise	Other Christian	6	No	486001	48600102	2	4860	1	2	Kasaî occidental	Urban	Male	Other Christian	Married (monogamous)	Inactive	25-29	5	15000		2756812	175200	48000	815936	369200	0	0	0	8000	0	0	229360	4402508	Matched (3)	0	0	6	No	No	26	Inactive	Other Christian
750	1	Pool de Mata	55	Kongo Centra	Urban	Male	Chef de ménage	Congolaise	Catholic	6	No	75001	7500101	1	750	1	1	Bas-Congo	Urban	Male	Catholic	Married (monogamous)	Public	60-64	7	162159.7924		2756812	175200	48000	815936	369200	0	0	0	8000	0	0	229360	4402508	Matched (3)	0	0	6	No	No	64	Public	Catholic
1420	1	Kisangani Cluster	18	Tshopo	Urban	Male	Other parent	Congolaise	Other Christian	6	Yes	142001	14200106	6	1420	1	6	Province Orientale	Urban	Male	Other Christian	Married (monogamous)	Public	35-39	7			2756812	175200	48000	815936	369200	0	0	0	8000	0	0	229360	4402508	Matched (3)	0	0	6	Yes	Yes	12	Public	Other Christian
2420	1	Mbuji-Mayi Cluster	999	Kasai-Orient	Urban	Female	Chef de ménage	Congolaise	Other Christian	6	No	242001	24200101	1	2420	1	1	Kasaî Oriental	Urban	Female	Other Christian	Divorced	Chomeurs	35-39	8			2756812	175200	48000	815936	369200	0	0	0	8000	0	0	229360	4402508	Matched (3)	0	0	6	No	No	36	Chomeurs	Other Christian
480	1	Kinshasa Cluster	55	Kinshasa	Urban	Male	Child of the household head	Congolaise	Catholic	6	Yes	48001	4800105	5	480	1	5	Kinshasa	Urban	Male	Catholic	Married (monogamous)	Public	65-69	7			2756812	175200	48000	815936	369200	0	0	0	8000	0	0	229360	4402508	Matched (3)	0	0	6	Yes	Yes	16	Public	Catholic
3890	1	Pool de Uvir	155	Sud-Kivu	Township	Female	Child of the household head	Congolaise	Other Christian	6	Yes	389001	38900104	4	3890	1	4	Sud-Kivu	Urban	Male	Other Christian	Married (polygamous)	Informal agricultural	50-54	8			2756812	175200	48000	815936	369200	0	0	0	8000	0	0	229360	4402508	Matched (3)	0	0	6	Yes	Yes	10	Informal agricultural	Other Christian
7080	1	Isiro Cluster	1	Haut-Uele	Rural	Female	Spouse of the household head	Congolaise	Catholic	6	No	708001	70800102	2	7080	1	2	Province Orientale	Rural	Male	Catholic	Married (monogamous)	Inactive	50-54	3			2756812	175200	48000	815936	369200	0	0	0	8000	0	0	229360	4402508	Matched (3)	0	0	6	No	No	50	Inactive	Catholic
7610	1	Pool de Goma	2	Nord-Kivu	Rural	Male	Child of the household head	Congolaise	Other Christian	6	Yes	761001	76100103	3	7610	1	3	Nord-Kivu	Rural	Male	Other Christian	Married (monogamous)	Informal agricultural	30-34	7			2756812	175200	48000	815936	369200	0	0	0	8000	0	0	229360	4402508	Matched (3)	0	0	6	Yes	Yes	10	Informal agricultural	Other Christian
9310	1	Pool de Kabi	999	Lomami	Rural	Female	Child of the household head	Congolaise	Catholic	6	No	931001	93100104	4	9310	1	4	Kasaî occidental	Rural	Male	Catholic	Married (monogamous)	Public	40-44	5			2756812	175200	48000	815936	369200	0	0	0	8000	0	0	229360	4402508	Matched (3)	0	0	6	No	No	6	Public	Catholic
2500	1	Pool de Mwen	22	Lomami	Urban	Female	Child of the household head	Congolaise	Other religion	6	No	250001	25000105	5	2500	1	5	Kasaî Oriental	Urban	Male	Other religion	Married (monogamous)	Informal non-agricultural	40-44	6			1199504	0	0	58560	0	0	12200	0	0	0	0	0	1270264	Matched (3)	0	0	6	No	No	6	Informal non-agricultural	Other religion
120	1	Kinshasa Cluster	14	Kinshasa	Urban	Male	Child of the household head	Congolaise	Other Christian	6	No	12001	1200104	4	120	1	4	Kinshasa	Urban	Female	Animist	Widowed	Informal non-agricultural	50-54	9			2756812	175200	48000	815936	369200	0	0	0	8000	0	0	229360	4402508	Matched (3)	0	0	6	No	No	22	Informal non-agricultural	Other Christian
4520	1	Pool de Lodj	5	Sankuru	Township	Male	Chef de ménage	Congolaise	Protestant	6	No	452001	45200101	1	4520	1	1	Kasaî Oriental	Urban	Male	Protestant	Married (monogamous)	Informal non-agricultural	55-59	2	21500		2756812	175200	48000	815936	369200	0	0	0	8000	0	0	229360	4402508	Matched (3)	0	0	6	No	No	56	Informal non-agricultural	Protestant
420	1	Kinshasa Cluster	19	Kinshasa	Urban	Male	Child of the household head	Congolaise	Catholic	6	Yes	42001	4200103	3	420	1	3	Kinshasa	Urban	Male	Catholic	Married (monogamous)	Public	50-54	9			2756812	175200	48000	815936	369200	0	0	0	8000	0	0	229360	4402508	Matched (3)	0	0	6	Yes	Yes	20	Public	Catholic
360	1	Kinshasa Cluster	9	Kinshasa	Urban	Male	Child of the household head	Congolaise	Catholic	6	Yes	36001	3600102	2	360	1	2	Kinshasa	Urban	Male	Catholic	Widowed	Retired	75-79	2			2756812	175200	48000	815936	369200	0	0	0	8000	0	0	229360	4402508	Matched (3)	0	0	6	Yes	Yes	18	Retired	Catholic
7510	1	Pool de Goma	4	Nord-Kivu	Rural	Male	Child of the household head	Congolaise	Other Christian	6	Yes	751001	75100103	3	7510	1	3	Nord-Kivu	Rural	Male	Other Christian	Married (monogamous)	Informal agricultural	55-59	7			2756812	175200	48000	815936	369200	0	0	0	8000	0	0	229360	4402508	Matched (3)	0	0	6	Yes	Yes	14	Informal agricultural	Other Christian
7740	1	Pool de Buka	52	Sud-Kivu	Rural	Male	Child of the household head	Congolaise	Other religion	6	Yes	774001	77400108	8	7740	1	8	Sud-Kivu	Rural	Male	Other religion	Married (monogamous)	Informal non-agricultural	40-44	10			318420	0	0	43920	0	0	0	0	0	0	0	0	362340	Matched (3)	0	0	6	Yes	Yes	9	Informal non-agricultural	Other religion
4260	1	Pool de Mano	999	Tanganyka	Township	Female	Child of the household head	Congolaise	Protestant	6	Yes	426001	42600103	3	4260	1	3	Katanga	Urban	Male	Protestant	Married (monogamous)	Informal non-agricultural	30-34	5			2756812	175200	48000	815936	369200	0	0	0	8000	0	0	229360	4402508	Matched (3)	0	0	6	Yes	Yes	7	Informal non-agricultural	Protestant
2950	1	Pool de Band	33	Mai-Ndombe	Township	Female	Spouse of the household head	Congolaise	Protestant	6	No	295001	29500102	2	2950	1	2	Bandundu	Urban	Male	Protestant	Married (monogamous)	Informal agricultural	35-39	8	156000		2756812	175200	48000	815936	369200	0	0	0	8000	0	0	229360	4402508	Matched (3)	0	0	6	No	No	33	Informal agricultural	Protestant
6250	1	Pool de Gbad	7	Nord-Ubangi	Rural	Male	Child of the household head	Congolaise	Protestant	6	Yes	625001	62500102	2	6250	1	2	Equateur	Rural	Male	Protestant	Divorced	Informal agricultural	35-39	3			2756812	175200	48000	815936	369200	0	0	0	8000	0	0	229360	4402508	Matched (3)	0	0	6	Yes	Yes	12	Informal agricultural	Protestant
6220	1	Pool de Gbad	19	Nord-Ubangi	Rural	Female	Spouse of the household head	Congolaise	Catholic	6	Yes	622001	62200105	5	6220	1	5	Equateur	Rural	Male	Catholic	Married (polygamous)	Public	40-44	13			2756812	175200	48000	815936	369200	0	0	0	8000	0	0	229360	4402508	Matched (3)	0	0	6	Yes	Yes	37	Public	Catholic
2790	1	Pool de Tshi	999	Kasai	Urban	Female	Child of the household head	Congolaise	Other Christian	6	Yes	279001	27900103	3	2790	1	3	Kasaî occidental	Urban	Male	Other Christian	Married (monogamous)	Formal private sector	30-34	3			2756812	175200	48000	815936	369200	0	0	0	8000	0	0	229360	4402508	Matched (3)	0	0	6	Yes	Yes	8	Formal private sector	Other Christian
3130	1	Pool de Keng	3	Kwango	Township	Female	Child of the household head	Congolaise	Catholic	6	No	313001	31300106	6	3130	1	6	Bandundu	Urban	Male	Catholic	Married (monogamous)	Informal non-agricultural	55-59	12	7550.607216		2756812	175200	48000	815936	369200	0	0	0	8000	0	0	229360	4402508	Matched (3)	0	0	6	No	No	18	Informal non-agricultural	Catholic
1370	1	Kisangani Cluster	1	Tshopo	Urban	Male	Child of the household head	Congolaise	Other Christian	6	No	137001	13700103	3	1370	1	3	Province Orientale	Urban	Male	Other Christian	Married (monogamous)	Informal agricultural	65-69	4	60000		2756812	175200	48000	815936	369200	0	0	0	8000	0	0	229360	4402508	Matched (3)	0	0	6	No	No	40	Informal agricultural	Other Christian
3030	1	Pool de Idio	11	Kwilu	Township	Female	Child of the household head	Congolaise	Other religion	6	Yes	303001	30300106	6	3030	1	6	Bandundu	Urban	Male	Catholic	Married (monogamous)	Public	60-64	7			2756812	175200	48000	815936	369200	0	0	0	8000	0	0	229360	4402508	Matched (3)	0	0	6	Yes	Yes	14	Public	Other religion
5150	1	Pool de Band	2	Mai-Ndombe	Rural	Female	Child of the household head	Congolaise	Protestant	6	Yes	515001	51500103	3	5150	1	3	Bandundu	Rural	Male	Other Christian	Widowed	Public	40-44	5			2756812	175200	48000	815936	369200	0	0	0	8000	0	0	229360	4402508	Matched (3)	0	0	6	Yes	Yes	11	Public	Protestant
810	1	Pool de Band	68	Kwilu	Urban	Female	Child of the household head	Congolaise	Catholic	6	Yes	81001	8100104	4	810	1	4	Bandundu	Urban	Male	Catholic	Married (monogamous)	Public	40-44	5			2756812	175200	48000	815936	369200	0	0	0	8000	0	0	229360	4402508	Matched (3)	0	0	6	Yes	Yes	9	Public	Catholic
1060	1	Pool de Mban	3	Equateur	Urban	Female	Chef de ménage	Congolaise	Other Christian	6	No	106001	10600101	1	1060	1	1	Equateur	Urban	Female	Other Christian	Cohabiting	Informal non-agricultural	35-39	3	48000		2756812	175200	48000	815936	369200	0	0	0	8000	0	0	229360	4402508	Matched (3)	0	0	6	No	No	36	Informal non-agricultural	Other Christian
8410	1	Pool de Kami	999	Haut-Lomami	Rural	Female	Child of the household head	Congolaise	Catholic	6	Yes	841001	84100104	4	8410	1	4	Katanga	Rural	Male	Catholic	Married (monogamous)	Informal agricultural	40-44	7			2756812	175200	48000	815936	369200	0	0	0	8000	0	0	229360	4402508	Matched (3)	0	0	6	Yes	Yes	13	Informal agricultural	Catholic
5690	1	Pool de Mban	2	Equateur	Rural	Female	Spouse of the household head	Congolaise	Catholic	6	No	569001	56900102	2	5690	1	2	Equateur	Rural	Male	Protestant	Married (polygamous)	Informal agricultural	25-29	13	9155.313261		2756812	175200	48000	815936	369200	0	0	0	8000	0	0	229360	4402508	Matched (3)	0	0	6	No	No	27	Informal agricultural	Catholic
5520	1	Pool de Fesh	2	Kwango	Rural	Male	Other parent	Congolaise	Protestant	6	No	552001	55200105	5	5520	1	5	Bandundu	Rural	Male	Catholic	Missing	Informal agricultural	30-34	7	10572.42587	6000	5585740	435520	1294600	660139	571493	901880	60000	58000	96400	0	527100	947200	11138072	Matched (3)	0	0	6	No	No	19	Informal agricultural	Protestant
2680	1	Pool de Kana	999	Kasai-Centra	Urban	Male	Chef de ménage	Congolaise	Catholic	6	No	268001	26800101	1	2680	1	1	Kasaî occidental	Urban	Male	Catholic	Married (monogamous)	Informal non-agricultural	40-44	6	46500	80000	2756812	175200	48000	815936	369200	0	0	0	8000	0	0	229360	4402508	Matched (3)	0	0	6	No	No	40	Informal non-agricultural	Catholic
4390	1	Pool de Lubu	999	Haut-Katanga	Township	Female	Child of the household head	Congolaise	Catholic	6	Yes	439001	43900107	7	4390	1	7	Katanga	Urban	Male	Catholic	Married (monogamous)	Retired	55-59	11			2756812	175200	48000	815936	369200	0	0	0	8000	0	0	229360	4402508	Matched (3)	0	0	6	Yes	Yes	12	Retired	Catholic
1340	1	Kisangani Cluster	9	Tshopo	Urban	Male	Child of the household head	Congolaise	Catholic	6	Yes	134001	13400104	4	1340	1	4	Province Orientale	Urban	Male	Catholic	Married (monogamous)	Public	55-59	4			2756812	175200	48000	815936	369200	0	0	0	8000	0	0	229360	4402508	Matched (3)	0	0	6	Yes	Yes	12	Public	Catholic
3190	1	Pool de Basa	999	Equateur	Township	Female	Child of the household head	Congolaise	Other Christian	6	Yes	319001	31900104	4	3190	1	4	Equateur	Urban	Male	Other Christian	Married (monogamous)	Informal agricultural	35-39	10			2756812	175200	48000	815936	369200	0	0	0	8000	0	0	229360	4402508	Matched (3)	0	0	6	Yes	Yes	14	Informal agricultural	Other Christian
1490	1	Pool de Beni	2	Nord-Kivu	Urban	Male	Other parent	Congolaise	Catholic	6	Yes	149001	14900105	5	1490	1	5	Nord-Kivu	Urban	Female	Catholic	Divorced	Informal agricultural	50-54	5			2756812	175200	48000	815936	369200	0	0	0	8000	0	0	229360	4402508	Matched (3)	0	0	6	Yes	Yes	8	Informal agricultural	Catholic
3411	1	Pool de Boku	2	Tshuapa	Township	Female	Child of the household head	Congolaise	Catholic	6	Yes	341101	34110106	6	3411	1	6	Equateur	Urban	Male	Catholic	Married (monogamous)	Public	35-39	6			2756812	175200	48000	815936	369200	0	0	0	8000	0	0	229360	4402508	Matched (3)	0	0	6	Yes	Yes	6	Public	Catholic
2380	1	Mbuji-Mayi Cluster	999	Kasai-Orient	Urban	Male	Child of the household head	Congolaise	Other Christian	6	Yes	238001	23800106	6	2380	1	6	Kasaî Oriental	Urban	Male	Other Christian	Married (monogamous)	Informal non-agricultural	45-49	7			872460	7320	51700	220263	57500	42500	0	12000	22600	18000	0	36600	1340943	Matched (3)	1.342339	1.342339	6	Yes	Yes	11	Informal non-agricultural	Other Christian
3630	1	Isiro Cluster	12	Haut-Uele	Township	Female	Spouse of the household head	Congolaise	Catholic	6	No	363001	36300102	2	3630	1	2	Province Orientale	Urban	Male	Catholic	Cohabiting	Informal non-agricultural	35-39	4	11251.00706		346940	19520	0	104208	7000	34000	0	0	0	0	0	4000	515668	Matched (3)	0	0	6	No	No	18	Informal non-agricultural	Catholic
390	1	Kinshasa Cluster	111	Kinshasa	Urban	Female	Spouse of the household head	Congolaise	Protestant	6	No	39001	3900102	2	390	1	2	Kinshasa	Urban	Male	Protestant	Married (monogamous)	Formal private sector	45-49	8			2756812	175200	48000	815936	369200	0	0	0	8000	0	0	229360	4402508	Matched (3)	0	0	6	No	No	33	Formal private sector	Protestant
2970	1	Pool de Band	15	Mai-Ndombe	Township	Female	Child of the household head	Congolaise	Other Christian	6	Yes	297001	29700103	3	2970	1	3	Bandundu	Urban	Male	Other Christian	Married (monogamous)	Informal agricultural	35-39	7			3158308	0	50000	617522	27400	2000	27320	0	6000	189060	0	65640	4143250	Matched (3)	4.563085	4.563085	6	Yes	Yes	18	Informal agricultural	Other Christian
4280	1	Pool de Mano	999	Tanganyka	Township	Male	Child of the household head	Congolaise	Protestant	6	Yes	428001	42800105	5	4280	1	5	Katanga	Urban	Female	Protestant	Widowed	Informal agricultural	45-49	8			2756812	175200	48000	815936	369200	0	0	0	8000	0	0	229360	4402508	Matched (3)	0	0	6	Yes	Yes	12	Informal agricultural	Protestant
4650	1	Pool de Kabi	999	Lomami	Township	Female	Child of the household head	Congolaise	Catholic	6	Yes	465001	46500106	6	4650	1	6	Kasaî occidental	Urban	Female	Catholic	Divorced	Public	55-59	6			2756812	175200	48000	815936	369200	0	0	0	8000	0	0	229360	4402508	Matched (3)	0	0	6	Yes	Yes	11	Public	Catholic
6610	1	Pool de Boku	2	Tshuapa	Rural	Female	Child of the household head	Congolaise	Catholic	6	Yes	661001	66100105	5	6610	1	5	Equateur	Rural	Male	Catholic	Married (monogamous)	Informal agricultural	55-59	8			2756812	175200	48000	815936	369200	0	0	0	8000	0	0	229360	4402508	Matched (3)	0	0	6	Yes	Yes	8	Informal agricultural	Catholic
8190	1	Pool de Kasa	999	Lualaba	Rural	Female	Spouse of the household head	Congolaise	Protestant	6	No	819001	81900102	2	8190	1	2	Katanga	Rural	Male	Protestant	Married (monogamous)	Informal agricultural	60-64	8			2756812	175200	48000	815936	369200	0	0	0	8000	0	0	229360	4402508	Matched (3)	0	0	6	No	No	54	Informal agricultural	Protestant
8910	1	Mbuji-Mayi Cluster	999	Kasai-Orient	Rural	Male	Chef de ménage	Congolaise	Other Christian	6	No	891001	89100101	1	8910	1	1	Kasaî Oriental	Rural	Male	Other Christian	Married (monogamous)	Informal agricultural	40-44	8	17500		716140	134200	0	221972	0	0	0	0	0	0	0	0	1072312	Matched (3)	0	0	6	No	No	43	Informal agricultural	Other Christian
5460	1	Pool de Band	4	Kwilu	Rural	Male	Chef de ménage	Congolaise	Protestant	6	No	546001	54600101	1	5460	1	1	Bandundu	Rural	Male	Protestant	Married (monogamous)	Public	35-39	7	50000		2756812	175200	48000	815936	369200	0	0	0	8000	0	0	229360	4402508	Matched (3)	0	0	6	No	No	38	Public	Protestant
2230	1	Pool de Lika	999	Haut-Katanga	Urban	Female	Child of the household head	Congolaise	Other religion	6	No	223001	22300107	7	2230	1	7	Katanga	Urban	Male	Other religion	Married (monogamous)	Informal non-agricultural	50-54	8			2756812	175200	48000	815936	369200	0	0	0	8000	0	0	229360	4402508	Matched (3)	0	0	6	No	No	7	Informal non-agricultural	Other religion
3820	1	Pool de Beni	2	Nord-Kivu	Township	Male	Chef de ménage	Congolaise	Protestant	6	No	382001	38200101	1	3820	1	1	Nord-Kivu	Urban	Male	Protestant	Married (monogamous)	Informal agricultural	30-34	4	3500		2756812	175200	48000	815936	369200	0	0	0	8000	0	0	229360	4402508	Matched (3)	0	0	6	No	No	30	Informal agricultural	Protestant
4030	1	Pool de Pun	2	Maniema	Township	Female	Child of the household head	Congolaise	Protestant	6	Yes	403001	40300106	6	4030	1	6	Maniema	Urban	Male	Protestant	Married (monogamous)	Informal agricultural	55-59	6			991860	0	0	61144	12200	0	0	0	0	0	0	0	1065204	Matched (3)	0	0	6	Yes	Yes	6	Informal agricultural	Protestant
7560	1	Pool de Beni	2	Nord-Kivu	Rural	Female	Spouse of the household head	Congolaise	Protestant	6	No	756001	75600102	2	7560	1	2	Nord-Kivu	Rural	Male	Protestant	Married (monogamous)	Informal non-agricultural	25-29	5	7500		2756812	175200	48000	815936	369200	0	0	0	8000	0	0	229360	4402508	Matched (3)	0	0	6	No	No	22	Informal non-agricultural	Protestant
8590	1	Pool de Kale	999	Tanganyka	Rural	Male	Child of the household head	Congolaise	Catholic	6	Yes	859001	85900103	3	8590	1	3	Katanga	Rural	Male	Catholic	Married (monogamous)	Informal agricultural	35-39	6	0		2756812	175200	48000	815936	369200	0	0	0	8000	0	0	229360	4402508	Matched (3)	0	0	6	Yes	Yes	21	Informal agricultural	Catholic
660	1	Pool de Boma	78	Kongo Centra	Urban	Male	Chef de ménage	Congolaise	Other religion	6	No	66001	6600101	1	660	1	1	Bas-Congo	Urban	Male	Other religion	Married (monogamous)	Inactive	45-49	3			2756812	175200	48000	815936	369200	0	0	0	8000	0	0	229360	4402508	Matched (3)	0	0	6	No	No	47	Inactive	Other religion
2040	1	Pool de Kolw	999	Lualaba	Urban	Female	Other parent	Congolaise	Protestant	6	Yes	204001	20400104	4	2040	1	4	Katanga	Urban	Female	Protestant	Divorced	Formal private sector	30-34	6			2327272	14640	0	43200	172800	36800	0	0	0	95000	0	0	2689712	Matched (3)	3.531977	3.531977	6	Yes	Yes	8	Formal private sector	Protestant
7890	1	Pool de Kibo	4	Maniema	Rural	Male	Chef de ménage	Congolaise	Other Christian	6	No	789001	78900101	1	7890	1	1	Maniema	Rural	Male	Other Christian	Married (monogamous)	Informal agricultural	30-34	6	100000		2756812	175200	48000	815936	369200	0	0	0	8000	0	0	229360	4402508	Matched (3)	0	0	6	No	No	30	Informal agricultural	Other Christian
8220	1	Pool de Kasa	999	Lualaba	Rural	Female	Spouse of the household head	Congolaise	Other Christian	6	No	822001	82200102	2	8220	1	2	Katanga	Rural	Male	Other Christian	Married (monogamous)	Informal non-agricultural	25-29	5	43546.34892		1132160	24400	0	0	21960	0	0	0	0	0	0	0	1178520	Matched (3)	0	0	6	No	No	21	Informal non-agricultural	Other Christian
9240	1	Pool de Lusa	999	Sankuru	Rural	Female	Chef de ménage	Congolaise	Protestant	6	No	924001	92400101	1	9240	1	1	Kasaî Oriental	Rural	Female	Protestant	Widowed	Informal agricultural	40-44	9	32000		2756812	175200	48000	815936	369200	0	0	0	8000	0	0	229360	4402508	Matched (3)	0	0	6	No	No	44	Informal agricultural	Protestant
2030	1	Pool de Kolw	999	Lualaba	Urban	Female	Spouse of the household head	Congolaise	Protestant	6	No	203001	20300102	2	2030	1	2	Katanga	Urban	Male	Protestant	Married (monogamous)	Informal non-agricultural	45-49	5	60000		2756812	175200	48000	815936	369200	0	0	0	8000	0	0	229360	4402508	Matched (3)	0	0	6	No	No	42	Informal non-agricultural	Protestant
2490	1	Pool de Mwen	999	Lomami	Urban	Female	Spouse of the household head	Congolaise	Other Christian	6	No	249001	24900102	2	2490	1	2	Kasaî Oriental	Urban	Male	Other Christian	Married (monogamous)	Public	55-59	6			2756812	175200	48000	815936	369200	0	0	0	8000	0	0	229360	4402508	Matched (3)	0	0	6	No	No	42	Public	Other Christian
5520	1	Pool de Fesh	2	Kwango	Rural	Male	Other parent	Congolaise	Protestant	6	No	552001	55200103	3	5520	1	3	Bandundu	Rural	Male	Catholic	Missing	Informal agricultural	30-34	7	6000		2756812	175200	48000	815936	369200	0	0	0	8000	0	0	229360	4402508	Matched (3)	0	0	6	No	No	23	Informal agricultural	Protestant
180	1	Kinshasa Cluster	8	Kinshasa	Urban	Female	Child of the household head	Congolaise	Other Christian	6	Yes	18001	1800109	9	180	1	9	Kinshasa	Urban	Male	Other Christian	Married (monogamous)	Informal non-agricultural	55-59	14			2756812	175200	48000	815936	369200	0	0	0	8000	0	0	229360	4402508	Matched (3)	0	0	6	Yes	Yes	15	Informal non-agricultural	Other Christian
4570	1	Pool de Lusa	999	Sankuru	Township	Male	Child of the household head	Congolaise	Catholic	6	No	457001	45700104	4	4570	1	4	Kasaî Oriental	Urban	Male	Catholic	Married (polygamous)	Public	40-44	8	1000		2756812	175200	48000	815936	369200	0	0	0	8000	0	0	229360	4402508	Matched (3)	0	0	6	No	No	15	Public	Catholic
2060	1	Pool de Kolw	999	Lualaba	Urban	Female	Child of the household head	Congolaise	Protestant	6	Yes	206001	20600103	3	2060	1	3	Katanga	Urban	Male	Protestant	Married (monogamous)	Formal private sector	45-49	6			2756812	175200	48000	815936	369200	0	0	0	8000	0	0	229360	4402508	Matched (3)	0	0	6	Yes	Yes	13	Formal private sector	Protestant
3380	1	Pool de Lisa	208	Mongala	Township	Male	Child of the household head	Congolaise	Catholic	6	Yes	338001	33800108	8	3380	1	8	Equateur	Urban	Male	Catholic	Married (polygamous)	Informal non-agricultural	65-69	9			2756812	175200	48000	815936	369200	0	0	0	8000	0	0	229360	4402508	Matched (3)	0	0	6	Yes	Yes	9	Informal non-agricultural	Catholic
2610	1	Pool de Kana	999	Kasai-Centra	Urban	Male	Other parent	Congolaise	Catholic	6	Yes	261001	26100104	4	2610	1	4	Kasaî occidental	Urban	Male	Catholic	Married (monogamous)	Public	35-39	4			2756812	175200	48000	815936	369200	0	0	0	8000	0	0	229360	4402508	Matched (3)	0	0	6	Yes	Yes	23	Public	Catholic
1230	1	Pool de Gbad	2	Nord-Ubangi	Urban	Female	Child of the household head	Congolaise	Other religion	6	Yes	123001	12300104	4	1230	1	4	Equateur	Urban	Male	Kimbanguist	Married (polygamous)	Public	40-44	6			2756812	175200	48000	815936	369200	0	0	0	8000	0	0	229360	4402508	Matched (3)	0	0	6	Yes	Yes	7	Public	Other religion
8440	1	Pool de Kami	999	Haut-Lomami	Rural	Male	Chef de ménage	Congolaise	Protestant	6	No	844001	84400101	1	8440	1	1	Katanga	Rural	Male	Protestant	Married (monogamous)	Informal agricultural	30-34	6	9000		2756812	175200	48000	815936	369200	0	0	0	8000	0	0	229360	4402508	Matched (3)	0	0	6	No	No	34	Informal agricultural	Protestant
5820	1	Pool de Basa	999	Equateur	Rural	Female	Child of the household head	Congolaise	Other Christian	6	Yes	582001	58200104	4	5820	1	4	Equateur	Rural	Male	Other Christian	Married (monogamous)	Informal agricultural	25-29	7			929640	0	0	221216	14640	0	0	0	0	0	0	0	1165496	Matched (3)	0	0	6	Yes	Yes	12	Informal agricultural	Other Christian
1170	1	Pool de Zong	20	Sud-Ubangi	Urban	Male	Child of the household head	Congolaise	Protestant	6	Yes	117001	11700108	8	1170	1	8	Equateur	Urban	Male	Protestant	Married (monogamous)	Informal non-agricultural	40-44	11			893040	0	0	404553	0	0	43920	17080	0	0	41480	34160	1434233	Matched (3)	0	0	6	Yes	Yes	6	Informal non-agricultural	Protestant
3920	1	Pool de Uvir	999	Sud-Kivu	Township	Female	Child of the household head	Congolaise	Protestant	6	Yes	392001	39200105	5	3920	1	5	Sud-Kivu	Urban	Male	Protestant	Married (monogamous)	Inactive	40-44	6			2756812	175200	48000	815936	369200	0	0	0	8000	0	0	229360	4402508	Matched (3)	0	0	6	Yes	Yes	13	Inactive	Protestant
3300	1	Pool de Gbad	9	Nord-Ubangi	Township	Male	Child of the household head	Congolaise	Other Christian	6	Yes	330001	33000108	8	3300	1	8	Equateur	Urban	Male	Catholic	Married (monogamous)	Informal agricultural	45-49	14			2756812	175200	48000	815936	369200	0	0	0	8000	0	0	229360	4402508	Matched (3)	0	0	6	Yes	Yes	8	Informal agricultural	Other Christian
1700	1	Pool de Goma	1	Nord-Kivu	Urban	Female	Child of the household head	Congolaise	Protestant	6	Yes	170001	17000103	3	1700	1	3	Nord-Kivu	Urban	Male	Protestant	Married (monogamous)	Informal non-agricultural	35-39	4			2756812	175200	48000	815936	369200	0	0	0	8000	0	0	229360	4402508	Matched (3)	0	0	6	Yes	Yes	11	Informal non-agricultural	Protestant
1730	1	Pool de Goma	2	Nord-Kivu	Urban	Male	Chef de ménage	Congolaise	Protestant	6	No	173001	17300101	1	1730	1	1	Nord-Kivu	Urban	Male	Protestant	Married (monogamous)	Informal non-agricultural	35-39	2			2756812	175200	48000	815936	369200	0	0	0	8000	0	0	229360	4402508	Matched (3)	0	0	6	No	No	38	Informal non-agricultural	Protestant
7620	1	Pool de Goma	2	Nord-Kivu	Rural	Female	Other parent	Congolaise	Catholic	6	No	762001	76200102	2	7620	1	2	Nord-Kivu	Rural	Female	Catholic	Widowed	Inactive	70-74	2	11747.51632		2756812	175200	48000	815936	369200	0	0	0	8000	0	0	229360	4402508	Matched (3)	0	0	6	No	No	23	Inactive	Catholic
3910	1	Pool de Uvir	999	Sud-Kivu	Township	Male	Chef de ménage	Congolaise	Catholic	6	No	391001	39100101	1	3910	1	1	Sud-Kivu	Urban	Male	Catholic	Married (monogamous)	Public	30-34	5	60000		2756812	175200	48000	815936	369200	0	0	0	8000	0	0	229360	4402508	Matched (3)	0	0	6	No	No	31	Public	Catholic
1810	1	Pool de Goma	4	Nord-Kivu	Urban	Female	Child of the household head	Congolaise	Catholic	6	Yes	181001	18100103	3	1810	1	3	Nord-Kivu	Urban	Female	Catholic	Divorced	Informal non-agricultural	40-44	4			724680	0	0	419168	0	0	0	0	0	0	0	0	1143848	Matched (3)	0	0	6	Yes	Yes	12	Informal non-agricultural	Catholic
9830	1	Pool de Mwek	3	Kasai	Rural	Female	Child of the household head	Congolaise	Other Christian	6	Yes	983001	98300109	9	9830	1	9	Kasaî occidental	Rural	Male	Other Christian	Married (polygamous)	Informal agricultural	45-49	13			2756812	175200	48000	815936	369200	0	0	0	8000	0	0	229360	4402508	Matched (3)	0	0	6	Yes	Yes	8	Informal agricultural	Other Christian
9450	1	Pool de Mwen	999	Lomami	Rural	Female	Child of the household head	Congolaise	Catholic	6	Yes	945001	94500107	7	9450	1	7	Kasaî Oriental	Rural	Male	Catholic	Married (polygamous)	Informal agricultural	55-59	9			2756812	175200	48000	815936	369200	0	0	0	8000	0	0	229360	4402508	Matched (3)	0	0	6	Yes	Yes	14	Informal agricultural	Catholic
8250	1	Pool de Kasa	999	Lualaba	Rural	Female	Other parent	Congolaise	Protestant	6	No	825001	82500105	5	8250	1	5	Katanga	Rural	Male	Protestant	Married (monogamous)	Informal agricultural	35-39	7			553880	0	68000	139743	41098	9500	0	0	0	0	0	33600	845821	Matched (3)	0	0	6	No	No	6	Informal agricultural	Protestant
7990	1	Pool de Kibo	1	Maniema	Rural	Male	Other parent	Congolaise	Protestant	6	Yes	799001	79900106	6	7990	1	6	Maniema	Rural	Male	Protestant	Married (monogamous)	Public	30-34	8	6000		2756812	175200	48000	815936	369200	0	0	0	8000	0	0	229360	4402508	Matched (3)	0	0	6	Yes	Yes	17	Public	Protestant
5720	1	Pool de Mban	3	Equateur	Rural	Female	Child of the household head	Congolaise	Other Christian	6	Yes	572001	57200103	3	5720	1	3	Equateur	Rural	Male	Other Christian	Married (polygamous)	Informal agricultural	55-59	7			2756812	175200	48000	815936	369200	0	0	0	8000	0	0	229360	4402508	Matched (3)	0	0	6	Yes	Yes	14	Informal agricultural	Other Christian
8740	1	Pool de Lika	13	Haut-Katanga	Rural	Male	Chef de ménage	Congolaise	Protestant	6	No	874001	87400101	1	8740	1	1	Katanga	Rural	Male	Protestant	Married (monogamous)	Informal agricultural	60-64	3	45409.21417	30000	2756812	175200	48000	815936	369200	0	0	0	8000	0	0	229360	4402508	Matched (3)	0	0	6	No	No	60	Informal agricultural	Protestant
3182	1	Pool de Mban	19	Equateur	Township	Male	Child of the household head	Congolaise	Catholic	6	Yes	318201	31820103	3	3182	1	3	Equateur	Urban	Male	Catholic	Married (monogamous)	Informal agricultural	30-34	4			2756812	175200	48000	815936	369200	0	0	0	8000	0	0	229360	4402508	Matched (3)	0	0	6	Yes	Yes	8	Informal agricultural	Catholic
1850	1	Pool de Buka	155	Sud-Kivu	Urban	Female	Child of the household head	Congolaise	Protestant	6	Yes	185001	18500106	6	1850	1	6	Sud-Kivu	Urban	Male	Protestant	Married (monogamous)	Public	60-64	10			2756812	175200	48000	815936	369200	0	0	0	8000	0	0	229360	4402508	Matched (3)	0	0	6	Yes	Yes	20	Public	Protestant
7900	1	Pool de Kibo	34	Maniema	Rural	Male	Chef de ménage	Congolaise	Musulmane	6	No	790001	79000101	1	7900	1	1	Maniema	Rural	Male	Musulmane	Married (monogamous)	Public	30-34	5	16843.11256	20000	2756812	175200	48000	815936	369200	0	0	0	8000	0	0	229360	4402508	Matched (3)	0	0	6	No	No	31	Public	Musulmane
4792	1	Pool de Mwek	24	Kasai	Township	Female	Child of the household head	Congolaise	Other Christian	6	Yes	479201	47920110	10	4792	1	10	Kasaî occidental	Urban	Male	Other Christian	Married (monogamous)	Informal non-agricultural	40-44	10			2756812	175200	48000	815936	369200	0	0	0	8000	0	0	229360	4402508	Matched (3)	0	0	6	Yes	Yes	7	Informal non-agricultural	Other Christian
3130	1	Pool de Keng	3	Kwango	Township	Male	Child of the household head	Congolaise	Catholic	6	Yes	313001	31300104	4	3130	1	4	Bandundu	Urban	Male	Catholic	Married (monogamous)	Informal non-agricultural	55-59	12	60000		2756812	175200	48000	815936	369200	0	0	0	8000	0	0	229360	4402508	Matched (3)	0	0	6	Yes	Yes	20	Informal non-agricultural	Catholic
4820	1	Pool de Mwek	22	Kasai	Township	Male	Chef de ménage	Congolaise	Other Christian	6	No	482001	48200101	1	4820	1	1	Kasaî occidental	Urban	Male	Other Christian	Married (monogamous)	Informal non-agricultural	25-29	2	50000		2756812	175200	48000	815936	369200	0	0	0	8000	0	0	229360	4402508	Matched (3)	0	0	6	No	No	28	Informal non-agricultural	Other Christian
5460	1	Pool de Band	4	Kwilu	Rural	Male	Child of the household head	Congolaise	Protestant	6	Yes	546001	54600103	3	5460	1	3	Bandundu	Rural	Male	Protestant	Married (monogamous)	Public	35-39	7			2756812	175200	48000	815936	369200	0	0	0	8000	0	0	229360	4402508	Matched (3)	0	0	6	Yes	Yes	16	Public	Protestant
9360	1	Pool de Mwen	999	Lomami	Rural	Female	Child of the household head	Congolaise	Protestant	6	Yes	936001	93600105	5	9360	1	5	Kasaî Oriental	Rural	Male	Protestant	Married (monogamous)	Public	60-64	7			2756812	175200	48000	815936	369200	0	0	0	8000	0	0	229360	4402508	Matched (3)	0	0	6	Yes	Yes	17	Public	Protestant
8890	1	Mbuji-Mayi Cluster	999	Kasai-Orient	Rural	Male	Child of the household head	Congolaise	Catholic	6	Yes	889001	88900103	3	8890	1	3	Kasaî Oriental	Rural	Male	Catholic	Married (monogamous)	Informal agricultural	45-49	9			2756812	175200	48000	815936	369200	0	0	0	8000	0	0	229360	4402508	Matched (3)	0	0	6	Yes	Yes	20	Informal agricultural	Catholic
4062	1	Pool de Kolw	999	Lualaba	Township	Male	Child of the household head	Congolaise	Protestant	6	Yes	406201	40620103	3	4062	1	3	Katanga	Urban	Male	Protestant	Married (monogamous)	Informal non-agricultural	30-34	7			2756812	175200	48000	815936	369200	0	0	0	8000	0	0	229360	4402508	Matched (3)	0	0	6	Yes	Yes	8	Informal non-agricultural	Protestant
4770	1	Pool de Kana	999	Kasai-Centra	Township	Female	Child of the household head	Congolaise	Other Christian	6	Yes	477001	47700106	6	4770	1	6	Kasaî occidental	Urban	Male	Other Christian	Married (monogamous)	Inactive	45-49	9			2756812	175200	48000	815936	369200	0	0	0	8000	0	0	229360	4402508	Matched (3)	0	0	6	Yes	Yes	7	Inactive	Other Christian
970	1	Pool de Kikw	59	Kwilu	Urban	Female	Other parent	Congolaise	Catholic	6	Yes	97001	9700103	3	970	1	3	Bandundu	Urban	Male	Catholic	Married (monogamous)	Informal non-agricultural	65-69	3			2756812	175200	48000	815936	369200	0	0	0	8000	0	0	229360	4402508	Matched (3)	0	0	6	Yes	Yes	13	Informal non-agricultural	Catholic
4370	1	Pool de Lubu	999	Haut-Katanga	Township	Male	Chef de ménage	Congolaise	Protestant	6	No	437001	43700101	1	4370	1	1	Katanga	Urban	Male	Protestant	Married (monogamous)	Public	55-59	7	162000		2756812	175200	48000	815936	369200	0	0	0	8000	0	0	229360	4402508	Matched (3)	0	0	6	No	No	57	Public	Protestant
4610	1	Pool de Lusa	999	Sankuru	Township	Female	Child of the household head	Congolaise	Other Christian	6	Yes	461001	46100105	5	4610	1	5	Kasaî Oriental	Urban	Male	None	Married (polygamous)	Public	50-54	13			2756812	175200	48000	815936	369200	0	0	0	8000	0	0	229360	4402508	Matched (3)	0	0	6	Yes	Yes	18	Public	Other Christian
7980	1	Pool de Kind	3	Maniema	Rural	Male	Child of the household head	Congolaise	Protestant	6	Yes	798001	79800104	4	7980	1	4	Maniema	Rural	Male	Other Christian	Married (polygamous)	Informal agricultural	45-49	7			2756812	175200	48000	815936	369200	0	0	0	8000	0	0	229360	4402508	Matched (3)	0	0	6	Yes	Yes	20	Informal agricultural	Protestant
3300	1	Pool de Gbad	9	Nord-Ubangi	Township	Female	Other parent	Congolaise	Other Christian	6	No	330001	33000113	13	3300	1	13	Equateur	Urban	Male	Catholic	Married (monogamous)	Informal agricultural	45-49	14	42097.88893		2756812	175200	48000	815936	369200	0	0	0	8000	0	0	229360	4402508	Matched (3)	0	0	6	No	No	50	Informal agricultural	Other Christian
2100	1	Pool de Kolw	999	Lualaba	Urban	Male	Chef de ménage	Congolaise	Other Christian	6	No	210001	21000101	1	2100	1	1	Katanga	Urban	Male	Other Christian	Married (monogamous)	Formal private sector	55-59	8	419541.8341		2756812	175200	48000	815936	369200	0	0	0	8000	0	0	229360	4402508	Matched (3)	0	0	6	No	No	56	Formal private sector	Other Christian
3380	1	Pool de Lisa	208	Mongala	Township	Male	Child of the household head	Congolaise	Catholic	6	Yes	338001	33800104	4	3380	1	4	Equateur	Urban	Male	Catholic	Married (polygamous)	Informal non-agricultural	65-69	9			789340	0	0	122805	8318	18000	0	0	0	0	0	57240	995703	Matched (3)	0	0	6	Yes	Yes	17	Informal non-agricultural	Catholic
1480	1	Pool de Beni	2	Nord-Kivu	Urban	Female	Spouse of the household head	Congolaise	Other Christian	6	No	148001	14800102	2	1480	1	2	Nord-Kivu	Urban	Male	Other Christian	Married (monogamous)	Public	25-29	3			2756812	175200	48000	815936	369200	0	0	0	8000	0	0	229360	4402508	Matched (3)	0	0	6	No	No	25	Public	Other Christian
9480	1	Pool de Kana	999	Kasai-Centra	Rural	Female	Spouse of the household head	Congolaise	Catholic	6	No	948001	94800102	2	9480	1	2	Kasaî occidental	Rural	Male	Catholic	Married (monogamous)	Informal non-agricultural	30-34	6	2500		2756812	175200	48000	815936	369200	0	0	0	8000	0	0	229360	4402508	Matched (3)	0	0	6	No	No	19	Informal non-agricultural	Catholic
9240	1	Pool de Lusa	999	Sankuru	Rural	Male	Child of the household head	Congolaise	Protestant	6	Yes	924001	92400104	4	9240	1	4	Kasaî Oriental	Rural	Female	Protestant	Widowed	Informal agricultural	40-44	9	3000		2756812	175200	48000	815936	369200	0	0	0	8000	0	0	229360	4402508	Matched (3)	0	0	6	Yes	Yes	14	Informal agricultural	Protestant
5390	1	Pool de Kikw	1	Kwilu	Rural	Male	Chef de ménage	Congolaise	None	6	No	539001	53900101	1	5390	1	1	Bandundu	Rural	Male	None	Married (monogamous)	Informal non-agricultural	35-39	5	12000		761280	0	0	159317	2440	0	0	0	0	0	0	0	923037	Matched (3)	0	0	6	No	No	35	Informal non-agricultural	None
7660	1	Pool de Beni	4	Nord-Kivu	Rural	Male	Child of the household head	Congolaise	Protestant	6	Yes	766001	76600105	5	7660	1	5	Nord-Kivu	Rural	Male	Protestant	Married (monogamous)	Informal agricultural	35-39	7			856964	0	104400	215383	181069	66761	90000	0	62000	0	0	41220	1617796	Matched (3)	0	0	6	Yes	Yes	9	Informal agricultural	Protestant
7970	1	Pool de Kind	3	Maniema	Rural	Female	Child of the household head	Congolaise	Catholic	6	Yes	797001	79700109	9	7970	1	9	Maniema	Rural	Male	Catholic	Married (polygamous)	Inactive	50-54	11			2756812	175200	48000	815936	369200	0	0	0	8000	0	0	229360	4402508	Matched (3)	0	0	6	Yes	Yes	7	Inactive	Catholic
480	1	Kinshasa Cluster	55	Kinshasa	Urban	Male	Child of the household head	Congolaise	Catholic	6	Yes	48001	4800106	6	480	1	6	Kinshasa	Urban	Male	Catholic	Married (monogamous)	Public	65-69	7			2756812	175200	48000	815936	369200	0	0	0	8000	0	0	229360	4402508	Matched (3)	0	0	6	Yes	Yes	13	Public	Catholic
4450	1	Mbuji-Mayi Cluster	999	Kasai-Orient	Township	Female	Child of the household head	Congolaise	Other Christian	6	Yes	445001	44500104	4	4450	1	4	Kasaî Oriental	Urban	Male	Other Christian	Married (monogamous)	Informal agricultural	55-59	9			2756812	175200	48000	815936	369200	0	0	0	8000	0	0	229360	4402508	Matched (3)	0	0	6	Yes	Yes	18	Informal agricultural	Other Christian
4100	1	Pool de Kasa	999	Lualaba	Township	Female	Spouse of the household head	Congolaise	Catholic	6	No	410001	41000102	2	4100	1	2	Katanga	Urban	Male	Catholic	Married (monogamous)	Public	50-54	3			2756812	175200	48000	815936	369200	0	0	0	8000	0	0	229360	4402508	Matched (3)	0	0	6	No	No	50	Public	Catholic
9160	1	Pool de Lodj	2	Sankuru	Rural	Male	Child of the household head	Congolaise	Catholic	6	Yes	916001	91600104	4	9160	1	4	Kasaî Oriental	Rural	Female	Catholic	Married (polygamous)	Informal agricultural	45-49	4			2756812	175200	48000	815936	369200	0	0	0	8000	0	0	229360	4402508	Matched (3)	0	0	6	Yes	Yes	18	Informal agricultural	Catholic
9800	1	Pool de Mwek	4	Kasai	Rural	Male	Child of the household head	Congolaise	Protestant	6	Yes	980001	98000103	3	9800	1	3	Kasaî occidental	Rural	Male	Protestant	Married (monogamous)	Informal agricultural	25-29	5			2756812	175200	48000	815936	369200	0	0	0	8000	0	0	229360	4402508	Matched (3)	0	0	6	Yes	Yes	6	Informal agricultural	Protestant
8140	1	Pool de Kasa	999	Lualaba	Rural	Female	Spouse of the household head	Congolaise	Other Christian	6	No	814001	81400102	2	8140	1	2	Katanga	Rural	Male	Other Christian	Married (monogamous)	Public	45-49	6			2756812	175200	48000	815936	369200	0	0	0	8000	0	0	229360	4402508	Matched (3)	0	0	6	No	No	45	Public	Other Christian
1470	1	Pool de Beni	2	Nord-Kivu	Urban	Female	Chef de ménage	Congolaise	Other Christian	6	No	147001	14700101	1	1470	1	1	Nord-Kivu	Urban	Female	Other Christian	Single	Chomeurs	35-39	1			2756812	175200	48000	815936	369200	0	0	0	8000	0	0	229360	4402508	Matched (3)	0	0	6	No	No	35	Chomeurs	Other Christian
180	1	Kinshasa Cluster	8	Kinshasa	Urban	Male	Chef de ménage	Congolaise	Other Christian	6	No	18001	1800101	1	180	1	1	Kinshasa	Urban	Male	Other Christian	Married (monogamous)	Informal non-agricultural	55-59	14	16268.77754		2756812	175200	48000	815936	369200	0	0	0	8000	0	0	229360	4402508	Matched (3)	0	0	6	No	No	58	Informal non-agricultural	Other Christian
8690	1	Pool de Lika	999	Haut-Katanga	Rural	Female	Child of the household head	Congolaise	Other religion	6	Yes	869001	86900104	4	8690	1	4	Katanga	Rural	Male	Other religion	Married (monogamous)	Informal agricultural	45-49	9			2756812	175200	48000	815936	369200	0	0	0	8000	0	0	229360	4402508	Matched (3)	0	0	6	Yes	Yes	12	Informal agricultural	Other religion
700	1	Pool de Mata	9	Kongo Centra	Urban	Female	Child of the household head	Congolaise	Catholic	6	No	70001	7000104	4	700	1	4	Bas-Congo	Urban	Male	Catholic	Married (monogamous)	Formal private sector	50-54	8			2756812	175200	48000	815936	369200	0	0	0	8000	0	0	229360	4402508	Matched (3)	0	0	6	No	No	25	Formal private sector	Catholic
1040	1	Pool de Mban	2	Equateur	Urban	Male	Child of the household head	Congolaise	Protestant	6	No	104001	10400103	3	1040	1	3	Equateur	Urban	Female	Protestant	Divorced	Informal non-agricultural	55-59	5			2756812	175200	48000	815936	369200	0	0	0	8000	0	0	229360	4402508	Matched (3)	0	0	6	No	No	34	Informal non-agricultural	Protestant
3280	1	Pool de Geme	2	Sud-Ubangi	Township	Male	Child of the household head	Congolaise	Protestant	6	Yes	328001	32800107	7	3280	1	7	Equateur	Urban	Male	Protestant	Married (monogamous)	Informal agricultural	45-49	7			2756812	175200	48000	815936	369200	0	0	0	8000	0	0	229360	4402508	Matched (3)	0	0	6	Yes	Yes	11	Informal agricultural	Protestant
4640	1	Pool de Kabi	999	Lomami	Township	Female	Child of the household head	Congolaise	Catholic	6	Yes	464001	46400104	4	4640	1	4	Kasaî occidental	Urban	Male	Catholic	Married (monogamous)	Informal agricultural	65-69	8	5000	10500	2756812	175200	48000	815936	369200	0	0	0	8000	0	0	229360	4402508	Matched (3)	0	0	6	Yes	Yes	24	Informal agricultural	Catholic
760	1	Pool de Mata	22	Kongo Centra	Urban	Female	Spouse of the household head	Congolaise	Other Christian	6	No	76001	7600102	2	760	1	2	Bas-Congo	Urban	Male	Other Christian	Married (monogamous)	Inactive	50-54	6			2756812	175200	48000	815936	369200	0	0	0	8000	0	0	229360	4402508	Matched (3)	0	0	6	No	No	44	Inactive	Other Christian
2570	1	Pool de Mwen	999	Lomami	Urban	Male	Other parent	Congolaise	Other religion	6	No	257001	25700107	7	2570	1	7	Kasaî Oriental	Urban	Male	Other religion	Married (polygamous)	Informal non-agricultural	40-44	9	20000		2756812	175200	48000	815936	369200	0	0	0	8000	0	0	229360	4402508	Matched (3)	0	0	6	No	No	40	Informal non-agricultural	Other religion
5520	1	Pool de Fesh	2	Kwango	Rural	Male	Other parent	Congolaise	Protestant	6	Yes	552001	55200106	6	5520	1	6	Bandundu	Rural	Male	Catholic	Missing	Informal agricultural	30-34	7	600		2756812	175200	48000	815936	369200	0	0	0	8000	0	0	229360	4402508	Matched (3)	0	0	6	Yes	Yes	13	Informal agricultural	Protestant
6120	1	Pool de Gbad	2	Nord-Ubangi	Rural	Male	Chef de ménage	Congolaise	Protestant	6	No	612001	61200101	1	6120	1	1	Equateur	Rural	Male	Protestant	Married (monogamous)	Informal agricultural	25-29	6	28000		248920	14960	70400	23432	71280	15200	25000	0	33000	2500	36400	10200	551292	Matched (3)	.4534806	.4534806	6	No	No	28	Informal agricultural	Protestant
3030	1	Pool de Idio	11	Kwilu	Township	Female	Child of the household head	Congolaise	Other religion	6	Yes	303001	30300105	5	3030	1	5	Bandundu	Urban	Male	Catholic	Married (monogamous)	Public	60-64	7			2756812	175200	48000	815936	369200	0	0	0	8000	0	0	229360	4402508	Matched (3)	0	0	6	Yes	Yes	18	Public	Other religion
3110	1	Pool de Temb	20	Kwango	Township	Male	Chef de ménage	Congolaise	Other Christian	6	No	311001	31100101	1	3110	1	1	Bandundu	Urban	Male	Other Christian	Married (monogamous)	Informal agricultural	40-44	5	5000	10000	2756812	175200	48000	815936	369200	0	0	0	8000	0	0	229360	4402508	Matched (3)	0	0	6	No	No	40	Informal agricultural	Other Christian
1390	1	Kisangani Cluster	6	Tshopo	Urban	Female	Spouse of the household head	Congolaise	Other Christian	6	No	139001	13900102	2	1390	1	2	Province Orientale	Urban	Male	Other Christian	Married (monogamous)	Public	65-69	4	315000	50981.97507	2756812	175200	48000	815936	369200	0	0	0	8000	0	0	229360	4402508	Matched (3)	0	0	6	No	No	58	Public	Other Christian
7160	1	Isiro Cluster	2	Haut-Uele	Rural	Female	Child of the household head	Congolaise	Protestant	6	Yes	716001	71600106	6	7160	1	6	Province Orientale	Rural	Male	Protestant	Married (monogamous)	Informal agricultural	50-54	9			2756812	175200	48000	815936	369200	0	0	0	8000	0	0	229360	4402508	Matched (3)	0	0	6	Yes	Yes	14	Informal agricultural	Protestant
5670	1	Pool de Mban	6	Equateur	Rural	Male	Chef de ménage	Congolaise	Catholic	6	No	567001	56700101	1	5670	1	1	Equateur	Rural	Male	Catholic	Married (monogamous)	Informal agricultural	50-54	3	47000		475940	19520	0	56000	12000	0	0	0	0	90000	0	0	653460	Matched (3)	13.77284	13.77284	6	No	No	51	Informal agricultural	Catholic
9450	1	Pool de Mwen	999	Lomami	Rural	Female	Child of the household head	Congolaise	Catholic	6	Yes	945001	94500105	5	9450	1	5	Kasaî Oriental	Rural	Male	Catholic	Married (polygamous)	Informal agricultural	55-59	9			2756812	175200	48000	815936	369200	0	0	0	8000	0	0	229360	4402508	Matched (3)	0	0	6	Yes	Yes	10	Informal agricultural	Catholic
7660	1	Pool de Beni	4	Nord-Kivu	Rural	Female	Child of the household head	Congolaise	Protestant	6	Yes	766001	76600103	3	7660	1	3	Nord-Kivu	Rural	Male	Protestant	Married (monogamous)	Informal agricultural	35-39	7			2756812	175200	48000	815936	369200	0	0	0	8000	0	0	229360	4402508	Matched (3)	0	0	6	Yes	Yes	18	Informal agricultural	Protestant
7980	1	Pool de Kind	3	Maniema	Rural	Female	Child of the household head	Congolaise	Protestant	6	Yes	798001	79800105	5	7980	1	5	Maniema	Rural	Male	Other Christian	Married (polygamous)	Informal agricultural	45-49	7			2756812	175200	48000	815936	369200	0	0	0	8000	0	0	229360	4402508	Matched (3)	0	0	6	Yes	Yes	18	Informal agricultural	Protestant
90	1	Kinshasa Cluster	22	Kinshasa	Urban	Female	Child of the household head	Congolaise	Other Christian	6	No	9001	900103	3	90	1	3	Kinshasa	Urban	Male	Catholic	Married (monogamous)	Formal private sector	50-54	8			1343220	73200	0	173695	0	4880	0	0	0	0	0	19520	1614515	Matched (3)	0	0	6	No	No	22	Formal private sector	Other Christian
4030	1	Pool de Pun	2	Maniema	Township	Female	Child of the household head	Congolaise	Protestant	6	Yes	403001	40300105	5	4030	1	5	Maniema	Urban	Male	Protestant	Married (monogamous)	Informal agricultural	55-59	6			2756812	175200	48000	815936	369200	0	0	0	8000	0	0	229360	4402508	Matched (3)	0	0	6	Yes	Yes	9	Informal agricultural	Protestant
1890	1	Pool de Buka	33	Sud-Kivu	Urban	Male	Other parent	Congolaise	Protestant	6	Yes	189001	18900107	7	1890	1	7	Sud-Kivu	Urban	Male	Protestant	Married (monogamous)	Public	55-59	7			2756812	175200	48000	815936	369200	0	0	0	8000	0	0	229360	4402508	Matched (3)	0	0	6	Yes	Yes	27	Public	Protestant
4310	1	Pool de Kase	999	Haut-Katanga	Township	Female	Spouse of the household head	Congolaise	Catholic	6	No	431001	43100102	2	4310	1	2	Katanga	Urban	Male	Catholic	Married (monogamous)	Public	50-54	8			2756812	175200	48000	815936	369200	0	0	0	8000	0	0	229360	4402508	Matched (3)	0	0	6	No	No	49	Public	Catholic
5820	1	Pool de Basa	999	Equateur	Rural	Female	Spouse of the household head	Congolaise	Other Christian	6	No	582001	58200102	2	5820	1	2	Equateur	Rural	Male	Other Christian	Married (monogamous)	Informal agricultural	25-29	7	10000		2756812	175200	48000	815936	369200	0	0	0	8000	0	0	229360	4402508	Matched (3)	0	0	6	No	No	28	Informal agricultural	Other Christian
1850	1	Pool de Buka	155	Sud-Kivu	Urban	Female	Child of the household head	Congolaise	Protestant	6	Yes	185001	18500103	3	1850	1	3	Sud-Kivu	Urban	Male	Protestant	Married (monogamous)	Public	60-64	10			696350	850	6600	173662	22060	0	0	0	7320	6000	0	2440	915282	Matched (3)	.6555355	.6555355	6	Yes	Yes	29	Public	Protestant
2570	1	Pool de Mwen	999	Lomami	Urban	Male	Other parent	Congolaise	Other religion	6	No	257001	25700109	9	2570	1	9	Kasaî Oriental	Urban	Male	Other religion	Married (polygamous)	Informal non-agricultural	40-44	9	15000		2756812	175200	48000	815936	369200	0	0	0	8000	0	0	229360	4402508	Matched (3)	0	0	6	No	No	27	Informal non-agricultural	Other religion
3990	1	Pool de Kind	34	Maniema	Township	Male	Other parent	Congolaise	Protestant	6	Yes	399001	39900107	7	3990	1	7	Maniema	Urban	Male	Protestant	Married (polygamous)	Informal non-agricultural	35-39	13			2756812	175200	48000	815936	369200	0	0	0	8000	0	0	229360	4402508	Matched (3)	0	0	6	Yes	Yes	7	Informal non-agricultural	Protestant
640	1	Pool de Boma	250	Kongo Centra	Urban	Male	Chef de ménage	Congolaise	Catholic	6	No	64001	6400101	1	640	1	1	Bas-Congo	Urban	Male	Catholic	Cohabiting	Public	20-24	2	54000		2756812	175200	48000	815936	369200	0	0	0	8000	0	0	229360	4402508	Matched (3)	0	0	6	No	No	24	Public	Catholic
910	1	Pool de Kikw	4	Kwilu	Urban	Female	Other parent	Congolaise	Protestant	6	Yes	91001	9100107	7	910	1	7	Bandundu	Urban	Female	Protestant	Single	Informal non-agricultural	35-39	6			2756812	175200	48000	815936	369200	0	0	0	8000	0	0	229360	4402508	Matched (3)	0	0	6	Yes	Yes	8	Informal non-agricultural	Protestant
300	1	Kinshasa Cluster	24	Kinshasa	Urban	Male	Chef de ménage	Congolaise	Protestant	6	No	30001	3000101	1	300	1	1	Kinshasa	Urban	Male	Protestant	Married (monogamous)	Formal private sector	35-39	5	184000		2756812	175200	48000	815936	369200	0	0	0	8000	0	0	229360	4402508	Matched (3)	0	0	6	No	No	37	Formal private sector	Protestant
2280	1	Pool de Lubu	999	Haut-Katanga	Urban	Male	Chef de ménage	Congolaise	Catholic	6	No	228001	22800101	1	2280	1	1	Katanga	Urban	Male	Catholic	Married (monogamous)	Informal non-agricultural	35-39	5	50979.06627		2756812	175200	48000	815936	369200	0	0	0	8000	0	0	229360	4402508	Matched (3)	0	0	6	No	No	39	Informal non-agricultural	Catholic
2190	1	Pool de Lika	999	Haut-Katanga	Urban	Female	Other parent	Congolaise	Other Christian	6	Yes	219001	21900103	3	2190	1	3	Katanga	Urban	Male	Other Christian	Married (monogamous)	Informal non-agricultural	30-34	6			2756812	175200	48000	815936	369200	0	0	0	8000	0	0	229360	4402508	Matched (3)	0	0	6	Yes	Yes	14	Informal non-agricultural	Other Christian
4360	1	Pool de Lubu	999	Haut-Katanga	Township	Female	Child of the household head	Congolaise	Protestant	6	No	436001	43600103	3	4360	1	3	Katanga	Urban	Male	Protestant	Married (monogamous)	Informal agricultural	40-44	9			2756812	175200	48000	815936	369200	0	0	0	8000	0	0	229360	4402508	Matched (3)	0	0	6	No	No	17	Informal agricultural	Protestant
9600	1	Pool de Kana	999	Kasai-Centra	Rural	Male	Child of the household head	Congolaise	Other Christian	6	No	960001	96000104	4	9600	1	4	Kasaî occidental	Rural	Male	Other Christian	Married (monogamous)	Informal agricultural	45-49	10	40418.19012		2756812	175200	48000	815936	369200	0	0	0	8000	0	0	229360	4402508	Matched (3)	0	0	6	No	No	18	Informal agricultural	Other Christian
7640	1	Pool de Beni	2	Nord-Kivu	Rural	Male	Chef de ménage	Congolaise	Protestant	6	No	764001	76400101	1	7640	1	1	Nord-Kivu	Rural	Male	Protestant	Married (monogamous)	Informal agricultural	30-34	4	40000		2756812	175200	48000	815936	369200	0	0	0	8000	0	0	229360	4402508	Matched (3)	0	0	6	No	No	30	Informal agricultural	Protestant
1980	1	Pool de Kind	44	Maniema	Urban	Male	Chef de ménage	Congolaise	Catholic	6	No	198001	19800101	1	1980	1	1	Maniema	Urban	Male	Catholic	Married (monogamous)	Public	25-29	4	60000		2756812	175200	48000	815936	369200	0	0	0	8000	0	0	229360	4402508	Matched (3)	0	0	6	No	No	29	Public	Catholic
2340	1	Pool de Lubu	999	Haut-Katanga	Urban	Male	Child of the household head	Congolaise	Other Christian	6	No	234001	23400103	3	2340	1	3	Katanga	Urban	Female	Other Christian	Widowed	Informal non-agricultural	35-39	4			2756812	175200	48000	815936	369200	0	0	0	8000	0	0	229360	4402508	Matched (3)	0	0	6	No	No	9	Informal non-agricultural	Other Christian
3490	1	Pool de Bas	3	Tshopo	Township	Female	Child of the household head	Congolaise	Other religion	6	Yes	349001	34900104	4	3490	1	4	Province Orientale	Urban	Male	Other religion	Married (monogamous)	Public	45-49	10			3231640	0	900000	954352	47300	0	26400	0	0	945000	0	0	6104692	Matched (3)	15.4799	15.4799	6	Yes	Yes	16	Public	Other religion
960	1	Pool de Kikw	1	Kwilu	Urban	Male	Other parent	Congolaise	Protestant	6	Yes	96001	9600104	4	960	1	4	Bandundu	Urban	Male	Protestant	Married (monogamous)	Informal non-agricultural	35-39	8			2756812	175200	48000	815936	369200	0	0	0	8000	0	0	229360	4402508	Matched (3)	0	0	6	Yes	Yes	16	Informal non-agricultural	Protestant
8960	1	Mbuji-Mayi Cluster	999	Kasai-Orient	Rural	Male	Chef de ménage	Congolaise	Other Christian	6	No	896001	89600101	1	8960	1	1	Kasaî Oriental	Rural	Male	Other Christian	Married (polygamous)	Informal agricultural	50-54	8	10000		2756812	175200	48000	815936	369200	0	0	0	8000	0	0	229360	4402508	Matched (3)	0	0	6	No	No	53	Informal agricultural	Other Christian
2440	1	Mbuji-Mayi Cluster	999	Kasai-Orient	Urban	Female	Spouse of the household head	Congolaise	Other Christian	6	No	244001	24400102	2	2440	1	2	Kasaî Oriental	Urban	Male	Other Christian	Married (monogamous)	Informal non-agricultural	35-39	6	14000		2756812	175200	48000	815936	369200	0	0	0	8000	0	0	229360	4402508	Matched (3)	0	0	6	No	No	28	Informal non-agricultural	Other Christian
3510	1	Pool de Bun	15	Ituri	Township	Female	Child of the household head	Congolaise	Catholic	6	Yes	351001	35100110	10	3510	1	10	Province Orientale	Urban	Male	Catholic	Married (monogamous)	Public	60-64	18			2756812	175200	48000	815936	369200	0	0	0	8000	0	0	229360	4402508	Matched (3)	0	0	6	Yes	Yes	12	Public	Catholic
9010	1	Mbuji-Mayi Cluster	999	Kasai-Orient	Rural	Male	Child of the household head	Congolaise	Other Christian	6	Yes	901001	90100107	7	9010	1	7	Kasaî Oriental	Rural	Male	Other Christian	Married (monogamous)	Informal agricultural	40-44	12	7989.303083		2756812	175200	48000	815936	369200	0	0	0	8000	0	0	229360	4402508	Matched (3)	0	0	6	Yes	Yes	12	Informal agricultural	Other Christian
9010	1	Mbuji-Mayi Cluster	999	Kasai-Orient	Rural	Female	Spouse of the household head	Congolaise	Other Christian	6	No	901001	90100102	2	9010	1	2	Kasaî Oriental	Rural	Male	Other Christian	Married (monogamous)	Informal agricultural	40-44	12	9815.409993		2756812	175200	48000	815936	369200	0	0	0	8000	0	0	229360	4402508	Matched (3)	0	0	6	No	No	37	Informal agricultural	Other Christian
2460	1	Mbuji-Mayi Cluster	999	Kasai-Orient	Urban	Female	Child of the household head	Congolaise	Other religion	6	No	246001	24600107	7	2460	1	7	Kasaî Oriental	Urban	Male	Other religion	Married (monogamous)	Public	45-49	8			2756812	175200	48000	815936	369200	0	0	0	8000	0	0	229360	4402508	Matched (3)	0	0	6	No	No	8	Public	Other religion
6080	1	Pool de Gbad	2	Nord-Ubangi	Rural	Female	Spouse of the household head	Congolaise	Protestant	6	No	608001	60800102	2	6080	1	2	Equateur	Rural	Male	Protestant	Married (monogamous)	Informal agricultural	45-49	8	95804.04869		2756812	175200	48000	815936	369200	0	0	0	8000	0	0	229360	4402508	Matched (3)	0	0	6	No	No	32	Informal agricultural	Protestant
320	1	Kinshasa Cluster	19	Kinshasa	Urban	Male	Child of the household head	Congolaise	Other Christian	6	Yes	32001	3200105	5	320	1	5	Kinshasa	Urban	Male	Other Christian	Married (monogamous)	Public	55-59	6			2756812	175200	48000	815936	369200	0	0	0	8000	0	0	229360	4402508	Matched (3)	0	0	6	Yes	Yes	12	Public	Other Christian
720	1	Pool de Mata	36	Kongo Centra	Urban	Male	Child of the household head	Congolaise	Other Christian	6	Yes	72001	7200104	4	720	1	4	Bas-Congo	Urban	Male	Protestant	Married (monogamous)	Public	40-44	6			2756812	175200	48000	815936	369200	0	0	0	8000	0	0	229360	4402508	Matched (3)	0	0	6	Yes	Yes	14	Public	Other Christian
940	1	Pool de Kikw	1	Kwilu	Urban	Male	Chef de ménage	Congolaise	Catholic	6	No	94001	9400101	1	940	1	1	Bandundu	Urban	Male	Catholic	Married (monogamous)	Chomeurs	25-29	3			723867	0	0	112903	0	0	0	0	0	0	0	0	836769	Matched (3)	0	0	6	No	No	27	Chomeurs	Catholic
4450	1	Mbuji-Mayi Cluster	999	Kasai-Orient	Township	Male	Child of the household head	Congolaise	Other Christian	6	Yes	445001	44500106	6	4450	1	6	Kasaî Oriental	Urban	Male	Other Christian	Married (monogamous)	Informal agricultural	55-59	9			1616620	46360	343000	17383	229280	229769	300000	0	60000	2150	0	53960	2898522	Matched (3)	.0741757	.0741757	6	Yes	Yes	10	Informal agricultural	Other Christian
1100	1	Pool de Mban	4	Equateur	Urban	Male	Chef de ménage	Congolaise	Protestant	6	No	110001	11000101	1	1100	1	1	Equateur	Urban	Male	Protestant	Married (monogamous)	Informal non-agricultural	45-49	12	90000	97727.21496	2756812	175200	48000	815936	369200	0	0	0	8000	0	0	229360	4402508	Matched (3)	0	0	6	No	No	49	Informal non-agricultural	Protestant
3411	1	Pool de Boku	2	Tshuapa	Township	Female	Spouse of the household head	Congolaise	Catholic	6	No	341101	34110102	2	3411	1	2	Equateur	Urban	Male	Catholic	Married (monogamous)	Public	35-39	6	20000	4000	2756812	175200	48000	815936	369200	0	0	0	8000	0	0	229360	4402508	Matched (3)	0	0	6	No	No	36	Public	Catholic
7200	1	Isiro Cluster	1	Haut-Uele	Rural	Female	Spouse of the household head	Congolaise	Catholic	6	No	720001	72000102	2	7200	1	2	Province Orientale	Rural	Male	Catholic	Cohabiting	Informal agricultural	30-34	4	14000		2756812	175200	48000	815936	369200	0	0	0	8000	0	0	229360	4402508	Matched (3)	0	0	6	No	No	22	Informal agricultural	Catholic
7240	1	Isiro Cluster	1	Haut-Uele	Rural	Male	Chef de ménage	Congolaise	Catholic	6	No	724001	72400101	1	7240	1	1	Province Orientale	Rural	Male	Catholic	Married (monogamous)	Informal agricultural	65-69	10	45000		2756812	175200	48000	815936	369200	0	0	0	8000	0	0	229360	4402508	Matched (3)	0	0	6	No	No	69	Informal agricultural	Catholic
2240	1	Pool de Lika	999	Haut-Katanga	Urban	Male	Chef de ménage	Congolaise	Other Christian	6	No	224001	22400101	1	2240	1	1	Katanga	Urban	Male	Other Christian	Married (monogamous)	Informal non-agricultural	25-29	1	405000		2756812	175200	48000	815936	369200	0	0	0	8000	0	0	229360	4402508	Matched (3)	0	0	6	No	No	25	Informal non-agricultural	Other Christian
1120	1	Pool de Mban	3	Equateur	Urban	Male	Chef de ménage	Congolaise	Catholic	6	No	112001	11200101	1	1120	1	1	Equateur	Urban	Male	Catholic	Married (monogamous)	Informal non-agricultural	35-39	4	202737.1764		2756812	175200	48000	815936	369200	0	0	0	8000	0	0	229360	4402508	Matched (3)	0	0	6	No	No	39	Informal non-agricultural	Catholic
3200	1	Pool de Basa	47	Equateur	Township	Female	Spouse of the household head	Congolaise	Other Christian	6	No	320001	32000102	2	3200	1	2	Equateur	Urban	Male	Other Christian	Cohabiting	Informal non-agricultural	30-34	5			2756812	175200	48000	815936	369200	0	0	0	8000	0	0	229360	4402508	Matched (3)	0	0	6	No	No	26	Informal non-agricultural	Other Christian
1540	1	Pool de Beni	22	Nord-Kivu	Urban	Male	Child of the household head	Congolaise	Catholic	6	Yes	154001	15400103	3	1540	1	3	Nord-Kivu	Urban	Male	Catholic	Married (monogamous)	Informal agricultural	50-54	3			2756812	175200	48000	815936	369200	0	0	0	8000	0	0	229360	4402508	Matched (3)	0	0	6	Yes	Yes	26	Informal agricultural	Catholic
910	1	Pool de Kikw	4	Kwilu	Urban	Male	Child of the household head	Congolaise	Protestant	6	Yes	91001	9100106	6	910	1	6	Bandundu	Urban	Female	Protestant	Single	Informal non-agricultural	35-39	6			2756812	175200	48000	815936	369200	0	0	0	8000	0	0	229360	4402508	Matched (3)	0	0	6	Yes	Yes	11	Informal non-agricultural	Protestant
5510	1	Pool de Fesh	1	Kwango	Rural	Male	Child of the household head	Congolaise	Catholic	6	Yes	551001	55100108	8	5510	1	8	Bandundu	Rural	Male	Protestant	Married (monogamous)	Informal agricultural	45-49	12			2756812	175200	48000	815936	369200	0	0	0	8000	0	0	229360	4402508	Matched (3)	0	0	6	Yes	Yes	9	Informal agricultural	Catholic
2370	1	Mbuji-Mayi Cluster	999	Kasai-Orient	Urban	Female	Child of the household head	Congolaise	Protestant	6	Yes	237001	23700104	4	2370	1	4	Kasaî Oriental	Urban	Male	Protestant	Married (monogamous)	Public	55-59	8			653920	34160	286200	0	47180	6000	0	0	0	1800	0	49360	1078620	Matched (3)	.1668799	.1668799	6	Yes	Yes	18	Public	Protestant
7160	1	Isiro Cluster	2	Haut-Uele	Rural	Male	Child of the household head	Congolaise	Protestant	6	Yes	716001	71600109	9	7160	1	9	Province Orientale	Rural	Male	Protestant	Married (monogamous)	Informal agricultural	50-54	9			2756812	175200	48000	815936	369200	0	0	0	8000	0	0	229360	4402508	Matched (3)	0	0	6	Yes	Yes	6	Informal agricultural	Protestant
4620	1	Pool de Kabi	999	Lomami	Township	Female	Other person	Congolaise	Protestant	6	No	462001	46200104	4	4620	1	4	Kasaî occidental	Urban	Female	Catholic	Widowed	Informal non-agricultural	65-69	10			464820	0	0	71268	0	0	0	0	0	0	0	26000	562088	Matched (3)	0	0	6	No	No	20	Informal non-agricultural	Protestant
530	1	Kinshasa Cluster	55	Kinshasa	Urban	Female	Other parent	Congolaise	None	6	No	53001	5300105	5	530	1	5	Kinshasa	Urban	Female	Protestant	Widowed	Inactive	60-64	12			2756812	175200	48000	815936	369200	0	0	0	8000	0	0	229360	4402508	Matched (3)	0	0	6	No	No	13	Inactive	None
7240	1	Isiro Cluster	1	Haut-Uele	Rural	Male	Child of the household head	Congolaise	Catholic	6	Yes	724001	72400106	6	7240	1	6	Province Orientale	Rural	Male	Catholic	Married (monogamous)	Informal agricultural	65-69	10			2756812	175200	48000	815936	369200	0	0	0	8000	0	0	229360	4402508	Matched (3)	0	0	6	Yes	Yes	14	Informal agricultural	Catholic
5520	1	Pool de Fesh	2	Kwango	Rural	Female	Other person	Congolaise	Protestant	6	No	552001	55200104	4	5520	1	4	Bandundu	Rural	Male	Catholic	Missing	Informal agricultural	30-34	7	42132.1225		2756812	175200	48000	815936	369200	0	0	0	8000	0	0	229360	4402508	Matched (3)	0	0	6	No	No	22	Informal agricultural	Protestant
3510	1	Pool de Bun	15	Ituri	Township	Female	Child of the household head	Congolaise	Catholic	6	Yes	351001	35100105	5	3510	1	5	Province Orientale	Urban	Male	Catholic	Married (monogamous)	Public	60-64	18			618440	12200	0	90788	9760	3660	0	0	0	0	0	0	734848	Matched (3)	0	0	6	Yes	Yes	22	Public	Catholic
8440	1	Pool de Kami	999	Haut-Lomami	Rural	Female	Spouse of the household head	Congolaise	Protestant	6	No	844001	84400102	2	8440	1	2	Katanga	Rural	Male	Protestant	Married (monogamous)	Informal agricultural	30-34	6			2756812	175200	48000	815936	369200	0	0	0	8000	0	0	229360	4402508	Matched (3)	0	0	6	No	No	26	Informal agricultural	Protestant
9410	1	Pool de Kabi	999	Lomami	Rural	Female	Other parent	Congolaise	Protestant	6	Yes	941001	94100106	6	9410	1	6	Kasaî occidental	Rural	Male	Protestant	Married (monogamous)	Informal non-agricultural	25-29	7			2756812	175200	48000	815936	369200	0	0	0	8000	0	0	229360	4402508	Matched (3)	0	0	6	Yes	Yes	NSP	Informal non-agricultural	Protestant
4370	1	Pool de Lubu	999	Haut-Katanga	Township	Female	Child of the household head	Congolaise	Protestant	6	Yes	437001	43700106	6	4370	1	6	Katanga	Urban	Male	Protestant	Married (monogamous)	Public	55-59	7			2756812	175200	48000	815936	369200	0	0	0	8000	0	0	229360	4402508	Matched (3)	0	0	6	Yes	Yes	16	Public	Protestant
8840	1	Pool de Kase	999	Haut-Katanga	Rural	Male	Child of the household head	Congolaise	Protestant	6	Yes	884001	88400103	3	8840	1	3	Katanga	Rural	Male	Protestant	Married (monogamous)	Informal agricultural	50-54	4			2756812	175200	48000	815936	369200	0	0	0	8000	0	0	229360	4402508	Matched (3)	0	0	6	Yes	Yes	16	Informal agricultural	Protestant
5660	1	Pool de Temb	7	Kwango	Rural	Male	Child of the household head	Congolaise	Catholic	6	Yes	566001	56600107	7	5660	1	7	Bandundu	Rural	Female	Catholic	Widowed	Informal agricultural	45-49	8			2756812	175200	48000	815936	369200	0	0	0	8000	0	0	229360	4402508	Matched (3)	0	0	6	Yes	Yes	12	Informal agricultural	Catholic
1100	1	Pool de Mban	4	Equateur	Urban	Male	Child of the household head	Congolaise	Protestant	6	Yes	110001	11000104	4	1100	1	4	Equateur	Urban	Male	Protestant	Married (monogamous)	Informal non-agricultural	45-49	12			2756812	175200	48000	815936	369200	0	0	0	8000	0	0	229360	4402508	Matched (3)	0	0	6	Yes	Yes	12	Informal non-agricultural	Protestant
9230	1	Pool de Lusa	999	Sankuru	Rural	Male	Child of the household head	Congolaise	Other Christian	6	Yes	923001	92300107	7	9230	1	7	Kasaî Oriental	Rural	Male	Other Christian	Married (monogamous)	Informal agricultural	50-54	9			2756812	175200	48000	815936	369200	0	0	0	8000	0	0	229360	4402508	Matched (3)	0	0	6	Yes	Yes	10	Informal agricultural	Other Christian
6790	1	Pool de Bas	4	Tshopo	Rural	Female	Chef de ménage	Congolaise	Other religion	6	No	679001	67900101	1	6790	1	1	Province Orientale	Rural	Female	Other religion	Divorced	Informal agricultural	20-24	2	9174.430418	60000	2756812	175200	48000	815936	369200	0	0	0	8000	0	0	229360	4402508	Matched (3)	0	0	6	No	No	22	Informal agricultural	Other religion
1090	1	Pool de Mban	1	Equateur	Urban	Female	Spouse of the household head	Congolaise	Catholic	6	No	109001	10900102	2	1090	1	2	Equateur	Urban	Male	Catholic	Married (monogamous)	Public	40-44	5			2756812	175200	48000	815936	369200	0	0	0	8000	0	0	229360	4402508	Matched (3)	0	0	6	No	No	33	Public	Catholic
1430	1	Kisangani Cluster	2	Tshopo	Urban	Female	Child of the household head	Congolaise	Missing	6	Yes	143001	14300106	6	1430	1	6	Province Orientale	Urban	Female	Missing	Married (monogamous)	Informal non-agricultural	35-39	8			2756812	175200	48000	815936	369200	0	0	0	8000	0	0	229360	4402508	Matched (3)	0	0	6	Yes	Yes	9	Informal non-agricultural	Missing
1430	1	Kisangani Cluster	2	Tshopo	Urban	Male	Child of the household head	Congolaise	Missing	6	Yes	143001	14300107	7	1430	1	7	Province Orientale	Urban	Female	Missing	Married (monogamous)	Informal non-agricultural	35-39	8			2756812	175200	48000	815936	369200	0	0	0	8000	0	0	229360	4402508	Matched (3)	0	0	6	Yes	Yes	7	Informal non-agricultural	Missing
2140	1	Pool de Lika	1	Haut-Katanga	Urban	Male	Other person	Congolaise	Catholic	6	Yes	214001	21400104	4	2140	1	4	Katanga	Urban	Male	Other religion	Widowed	Retired	70-74	7			2756812	175200	48000	815936	369200	0	0	0	8000	0	0	229360	4402508	Matched (3)	0	0	6	Yes	Yes	20	Retired	Catholic
7990	1	Pool de Kibo	1	Maniema	Rural	Male	Chef de ménage	Congolaise	Protestant	6	No	799001	79900101	1	7990	1	1	Maniema	Rural	Male	Protestant	Married (monogamous)	Public	30-34	8	51000		2756812	175200	48000	815936	369200	0	0	0	8000	0	0	229360	4402508	Matched (3)	0	0	6	No	No	32	Public	Protestant
7760	1	Pool de Buka	12	Sud-Kivu	Rural	Female	Child of the household head	Congolaise	Protestant	6	Yes	776001	77600106	6	7760	1	6	Sud-Kivu	Rural	Male	Catholic	Married (monogamous)	Informal agricultural	40-44	7			2756812	175200	48000	815936	369200	0	0	0	8000	0	0	229360	4402508	Matched (3)	0	0	6	Yes	Yes	8	Informal agricultural	Protestant
2450	1	Mbuji-Mayi Cluster	999	Kasai-Orient	Urban	Female	Spouse of the household head	Congolaise	Other religion	6	No	245001	24500102	2	2450	1	2	Kasaî Oriental	Urban	Male	Other religion	Married (monogamous)	Informal non-agricultural	35-39	7			2756812	175200	48000	815936	369200	0	0	0	8000	0	0	229360	4402508	Matched (3)	0	0	6	No	No	30	Informal non-agricultural	Other religion
2100	1	Pool de Kolw	999	Lualaba	Urban	Female	Child of the household head	Congolaise	Other Christian	6	Yes	210001	21000104	4	2100	1	4	Katanga	Urban	Male	Other Christian	Married (monogamous)	Formal private sector	55-59	8			2756812	175200	48000	815936	369200	0	0	0	8000	0	0	229360	4402508	Matched (3)	0	0	6	Yes	Yes	23	Formal private sector	Other Christian
2020	1	Pool de Kolw	999	Lualaba	Urban	Female	Other person	Congolaise	Catholic	6	No	202001	20200102	2	2020	1	2	Katanga	Urban	Female	Catholic	Widowed	Public	50-54	2			2756812	175200	48000	815936	369200	0	0	0	8000	0	0	229360	4402508	Matched (3)	0	0	6	No	No	25	Public	Catholic
230	1	Kinshasa Cluster	6	Kinshasa	Urban	Male	Other parent	Congolaise	Catholic	6	No	23001	2300102	2	230	1	2	Kinshasa	Urban	Male	None	Widowed	Public	55-59	2	102916.7141		2756812	175200	48000	815936	369200	0	0	0	8000	0	0	229360	4402508	Matched (3)	0	0	6	No	No	26	Public	Catholic
9600	1	Pool de Kana	999	Kasai-Centra	Rural	Male	Child of the household head	Congolaise	Other Christian	6	No	960001	96000103	3	9600	1	3	Kasaî occidental	Rural	Male	Other Christian	Married (monogamous)	Informal agricultural	45-49	10			2756812	175200	48000	815936	369200	0	0	0	8000	0	0	229360	4402508	Matched (3)	0	0	6	No	No	21	Informal agricultural	Other Christian
9120	1	Pool de Lodj	1	Sankuru	Rural	Male	Chef de ménage	Congolaise	Other religion	6	No	912001	91200101	1	9120	1	1	Kasaî Oriental	Rural	Male	Other religion	Married (monogamous)	Informal agricultural	30-34	5	28000	10000	2756812	175200	48000	815936	369200	0	0	0	8000	0	0	229360	4402508	Matched (3)	0	0	6	No	No	32	Informal agricultural	Other religion
4610	1	Pool de Lusa	999	Sankuru	Township	Male	Child of the household head	Congolaise	Other Christian	6	Yes	461001	46100109	9	4610	1	9	Kasaî Oriental	Urban	Male	None	Married (polygamous)	Public	50-54	13			2756812	175200	48000	815936	369200	0	0	0	8000	0	0	229360	4402508	Matched (3)	0	0	6	Yes	Yes	10	Public	Other Christian
1210	1	Pool de Zong	15	Sud-Ubangi	Urban	Female	Child of the household head	Congolaise	Other Christian	6	No	121001	12100104					Equateur	Urban	Male	Other Christian	Married (monogamous)	Informal agricultural	50-54	5			91500	0	19000	20333	99067	0	0	0	0	0	0	12200	242100	Matched (3)	0	0	6	No	No	3	Informal agricultural	Other Christian
2892	1	Pool de Song	2	Kongo Centra	Township	Female	Child of the household head	Congolaise	Kimbanguist	6	Yes	289201	28920106	6	2892	1	6	Bas-Congo	Urban	Male	Kimbanguist	Married (monogamous)	Public	45-49	8			2756812	175200	48000	815936	369200	0	0	0	8000	0	0	229360	4402508	Matched (3)	0	0	6	Yes	Yes	7	Public	Kimbanguist
6080	1	Pool de Gbad	2	Nord-Ubangi	Rural	Male	Chef de ménage	Congolaise	Protestant	6	No	608001	60800101	1	6080	1	1	Equateur	Rural	Male	Protestant	Married (monogamous)	Informal agricultural	45-49	8	98558.49375		681520	0	0	320266	22720	20000	0	15600	0	0	0	28400	1088505	Matched (3)	0	0	6	No	No	46	Informal agricultural	Protestant
830	1	Pool de Band	50	Kwilu	Urban	Male	Chef de ménage	Congolaise	Protestant	6	No	83001	8300101	1	830	1	1	Bandundu	Urban	Male	Protestant	Married (polygamous)	Public	45-49	5	60000		2756812	175200	48000	815936	369200	0	0	0	8000	0	0	229360	4402508	Matched (3)	0	0	6	No	No	46	Public	Protestant
8430	1	Pool de Kami	999	Haut-Lomami	Rural	Male	Child of the household head	Congolaise	Protestant	6	Yes	843001	84300103	3	8430	1	3	Katanga	Rural	Male	Protestant	Married (monogamous)	Informal agricultural	55-59	11			2756812	175200	48000	815936	369200	0	0	0	8000	0	0	229360	4402508	Matched (3)	0	0	6	Yes	Yes	23	Informal agricultural	Protestant
570	1	Pool de Boma	51	Kongo Centra	Urban	Male	Child of the household head	Congolaise	Other Christian	6	Yes	57001	5700105	5	570	1	5	Bas-Congo	Urban	Male	Other Christian	Married (monogamous)	Informal non-agricultural	55-59	7			2756812	175200	48000	815936	369200	0	0	0	8000	0	0	229360	4402508	Matched (3)	0	0	6	Yes	Yes	16	Informal non-agricultural	Other Christian
250	1	Kinshasa Cluster	8	Kinshasa	Urban	Male	Chef de ménage	Congolaise	Other Christian	6	No	25001	2500101	1	250	1	1	Kinshasa	Urban	Male	Other Christian	Cohabiting	Formal private sector	40-44	7	138000		2756812	175200	48000	815936	369200	0	0	0	8000	0	0	229360	4402508	Matched (3)	0	0	6	No	No	40	Formal private sector	Other Christian
3242	1	Pool de Geme	41	Sud-Ubangi	Township	Male	Other parent	Congolaise	Catholic	6	Yes	324201	32420106	6	3242	1	6	Equateur	Urban	Female	Protestant	Cohabiting	Informal non-agricultural	40-44	7			2756812	175200	48000	815936	369200	0	0	0	8000	0	0	229360	4402508	Matched (3)	0	0	6	Yes	Yes	13	Informal non-agricultural	Catholic
3390	1	Pool de Lisa	37	Mongala	Township	Female	Child of the household head	Congolaise	Other Christian	6	Yes	339001	33900105	5	3390	1	5	Equateur	Urban	Male	Other Christian	Married (monogamous)	Informal non-agricultural	50-54	6			2756812	175200	48000	815936	369200	0	0	0	8000	0	0	229360	4402508	Matched (3)	0	0	6	Yes	Yes	13	Informal non-agricultural	Other Christian
400	1	Kinshasa Cluster	40	Kinshasa	Urban	Female	Child of the household head	Congolaise	Other Christian	6	Yes	40001	4000103	3	400	1	3	Kinshasa	Urban	Male	Other Christian	Married (monogamous)	Informal non-agricultural	40-44	6			2756812	175200	48000	815936	369200	0	0	0	8000	0	0	229360	4402508	Matched (3)	0	0	6	Yes	Yes	10	Informal non-agricultural	Other Christian
4130	1	Pool de Kami	999	Haut-Lomami	Township	Female	Spouse of the household head	Congolaise	Protestant	6	No	413001	41300102	2	4130	1	2	Katanga	Urban	Male	Protestant	Married (monogamous)	Inactive	55-59	8	62000		2756812	175200	48000	815936	369200	0	0	0	8000	0	0	229360	4402508	Matched (3)	0	0	6	No	No	47	Inactive	Protestant
2290	1	Pool de Lubu	999	Haut-Katanga	Urban	Male	Child of the household head	Congolaise	Protestant	6	Yes	229001	22900103	3	2290	1	3	Katanga	Urban	Male	Protestant	Married (monogamous)	Informal agricultural	35-39	6			2756812	175200	48000	815936	369200	0	0	0	8000	0	0	229360	4402508	Matched (3)	0	0	6	Yes	Yes	12	Informal agricultural	Protestant
9830	1	Pool de Mwek	3	Kasai	Rural	Female	Child of the household head	Congolaise	Other Christian	6	Yes	983001	98300108	8	9830	1	8	Kasaî occidental	Rural	Male	Other Christian	Married (polygamous)	Informal agricultural	45-49	13			2756812	175200	48000	815936	369200	0	0	0	8000	0	0	229360	4402508	Matched (3)	0	0	6	Yes	Yes	10	Informal agricultural	Other Christian
8230	1	Pool de Kasa	999	Lualaba	Rural	Female	Chef de ménage	Congolaise	Other Christian	6	No	823001	82300101	1	8230	1	1	Katanga	Rural	Female	Other Christian	Divorced	Informal agricultural	30-34	3	60000		2756812	175200	48000	815936	369200	0	0	0	8000	0	0	229360	4402508	Matched (3)	0	0	6	No	No	30	Informal agricultural	Other Christian
4450	1	Mbuji-Mayi Cluster	999	Kasai-Orient	Township	Male	Child of the household head	Congolaise	Other Christian	6	Yes	445001	44500107	7	4450	1	7	Kasaî Oriental	Urban	Male	Other Christian	Married (monogamous)	Informal agricultural	55-59	9			2756812	175200	48000	815936	369200	0	0	0	8000	0	0	229360	4402508	Matched (3)	0	0	6	Yes	Yes	8	Informal agricultural	Other Christian
3920	1	Pool de Uvir	999	Sud-Kivu	Township	Female	Child of the household head	Congolaise	Protestant	6	Yes	392001	39200104	4	3920	1	4	Sud-Kivu	Urban	Male	Protestant	Married (monogamous)	Inactive	40-44	6			329400	154940	0	119056	0	0	0	0	0	0	0	0	603396	Matched (3)	0	0	6	Yes	Yes	18	Inactive	Protestant
8840	1	Pool de Kase	999	Haut-Katanga	Rural	Female	Child of the household head	Congolaise	Protestant	6	Yes	884001	88400104	4	8840	1	4	Katanga	Rural	Male	Protestant	Married (monogamous)	Informal agricultural	50-54	4			444320	17080	14400	56860	19000	600	0	0	1100	0	0	5600	558960	Matched (3)	0	0	6	Yes	Yes	12	Informal agricultural	Protestant
9220	1	Pool de Lodj	6	Sankuru	Rural	Male	Child of the household head	Congolaise	Catholic	6	Yes	922001	92200103	3	9220	1	3	Kasaî Oriental	Rural	Male	Catholic	Married (monogamous)	Public	65-69	10			2756812	175200	48000	815936	369200	0	0	0	8000	0	0	229360	4402508	Matched (3)	0	0	6	Yes	Yes	23	Public	Catholic
1910	1	Pool de Buka	40	Sud-Kivu	Urban	Male	Chef de ménage	Congolaise	Protestant	6	No	191001	19100101	1	1910	1	1	Sud-Kivu	Urban	Male	Protestant	Married (monogamous)	Informal non-agricultural	35-39	4	50224.55149		509980	31720	3000	24280	7600	1000	0	0	1000	0	400	600	579580	Matched (3)	0	0	6	No	No	35	Informal non-agricultural	Protestant
7740	1	Pool de Buka	52	Sud-Kivu	Rural	Male	Chef de ménage	Congolaise	Other religion	6	No	774001	77400101	1	7740	1	1	Sud-Kivu	Rural	Male	Other religion	Married (monogamous)	Informal non-agricultural	40-44	10	180000		2756812	175200	48000	815936	369200	0	0	0	8000	0	0	229360	4402508	Matched (3)	0	0	6	No	No	41	Informal non-agricultural	Other religion
5880	1	Pool de Geme	2	Sud-Ubangi	Rural	Female	Spouse of the household head	Congolaise	Other religion	6	No	588001	58800102	2	5880	1	2	Equateur	Rural	Male	Other religion	Married (monogamous)	Informal agricultural	30-34	3			2756812	175200	48000	815936	369200	0	0	0	8000	0	0	229360	4402508	Matched (3)	0	0	6	No	No	32	Informal agricultural	Other religion
5810	1	Pool de Basa	5	Equateur	Rural	Female	Child of the household head	Congolaise	Other Christian	6	Yes	581001	58100104	4	5810	1	4	Equateur	Rural	Male	Other Christian	Married (monogamous)	Informal agricultural	50-54	10			2756812	175200	48000	815936	369200	0	0	0	8000	0	0	229360	4402508	Matched (3)	0	0	6	Yes	Yes	25	Informal agricultural	Other Christian
3244	1	Pool de Geme	28	Sud-Ubangi	Township	Male	Child of the household head	Congolaise	Protestant	6	Yes	324401	32440104	4	3244	1	4	Equateur	Urban	Male	Protestant	Married (monogamous)	Informal agricultural	40-44	7			2756812	175200	48000	815936	369200	0	0	0	8000	0	0	229360	4402508	Matched (3)	0	0	6	Yes	Yes	7	Informal agricultural	Protestant
8030	1	Pool de Pun	1	Maniema	Rural	Female	Child of the household head	Congolaise	Protestant	6	Yes	803001	80300108	8	8030	1	8	Maniema	Rural	Male	Protestant	Married (monogamous)	Informal agricultural	65-69	15			334488	0	0	650865	0	0	4000	0	0	0	0	0	989354	Matched (3)	0	0	6	Yes	Yes	25	Informal agricultural	Protestant
4810	1	Pool de Mwek	29	Kasai	Township	Male	Chef de ménage	Congolaise	Other Christian	6	No	481001	48100101	1	4810	1	1	Kasaî occidental	Urban	Male	Other Christian	Married (monogamous)	Public	30-34	4	62000		2756812	175200	48000	815936	369200	0	0	0	8000	0	0	229360	4402508	Matched (3)	0	0	6	No	No	31	Public	Other Christian
150	1	Kinshasa Cluster	12	Kinshasa	Urban	Male	Chef de ménage	Congolaise	Catholic	6	No	15001	1500101	1	150	1	1	Kinshasa	Urban	Male	Catholic	Single	Informal non-agricultural	25-29	2	51164.28451		2756812	175200	48000	815936	369200	0	0	0	8000	0	0	229360	4402508	Matched (3)	0	0	6	No	No	26	Informal non-agricultural	Catholic
320	1	Kinshasa Cluster	19	Kinshasa	Urban	Male	Chef de ménage	Congolaise	Other Christian	6	No	32001	3200101	1	320	1	1	Kinshasa	Urban	Male	Other Christian	Married (monogamous)	Public	55-59	6	200000		2756812	175200	48000	815936	369200	0	0	0	8000	0	0	229360	4402508	Matched (3)	0	0	6	No	No	58	Public	Other Christian
8900	1	Mbuji-Mayi Cluster	999	Kasai-Orient	Rural	Male	Child of the household head	Congolaise	Catholic	6	Yes	890001	89000103	3	8900	1	3	Kasaî Oriental	Rural	Male	Catholic	Married (monogamous)	Informal agricultural	35-39	9			2756812	175200	48000	815936	369200	0	0	0	8000	0	0	229360	4402508	Matched (3)	0	0	6	Yes	Yes	11	Informal agricultural	Catholic
4480	1	Mbuji-Mayi Cluster	2	Kasai-Orient	Township	Male	Child of the household head	Congolaise	Catholic	6	No	448001	44800103	3	4480	1	3	Kasaî Oriental	Urban	Female	Catholic	Widowed	Informal agricultural	60-64	7	47255.0127		2756812	175200	48000	815936	369200	0	0	0	8000	0	0	229360	4402508	Matched (3)	0	0	6	No	No	44	Informal agricultural	Catholic
4130	1	Pool de Kami	999	Haut-Lomami	Township	Female	Child of the household head	Congolaise	Protestant	6	No	413001	41300103	3	4130	1	3	Katanga	Urban	Male	Protestant	Married (monogamous)	Inactive	55-59	8			699060	0	0	57216	25620	46360	73200	48800	7320	0	146400	13420	1117396	Matched (3)	0	0	6	No	No	26	Inactive	Protestant
2620	1	Pool de Kana	999	Kasai-Centra	Urban	Male	Child of the household head	Congolaise	Catholic	6	Yes	262001	26200103	3	2620	1	3	Kasaî occidental	Urban	Female	Catholic	Widowed	Informal non-agricultural	40-44	3			2756812	175200	48000	815936	369200	0	0	0	8000	0	0	229360	4402508	Matched (3)	0	0	6	Yes	Yes	10	Informal non-agricultural	Catholic
3181	1	Pool de Mban	28	Equateur	Township	Male	Chef de ménage	Congolaise	Other Christian	6	No	318101	31810101	1	3181	1	1	Equateur	Urban	Male	Other Christian	Married (monogamous)	Public	25-29	3	50000	25000	2756812	175200	48000	815936	369200	0	0	0	8000	0	0	229360	4402508	Matched (3)	0	0	6	No	No	29	Public	Other Christian
7880	1	Pool de Kibo	1	Maniema	Rural	Female	Spouse of the household head	Congolaise	Protestant	6	No	788001	78800103	3	7880	1	3	Maniema	Rural	Male	Catholic	Married (polygamous)	Informal agricultural	25-29	5	30000		728340	34160	19000	6655	24720	5600	0	0	0	0	9600	8400	836475	Matched (3)	0	0	6	No	No	27	Informal agricultural	Protestant
3920	1	Pool de Uvir	999	Sud-Kivu	Township	Female	Spouse of the household head	Congolaise	Protestant	6	No	392001	39200102	2	3920	1	2	Sud-Kivu	Urban	Male	Protestant	Married (monogamous)	Inactive	40-44	6			2756812	175200	48000	815936	369200	0	0	0	8000	0	0	229360	4402508	Matched (3)	0	0	6	No	No	40	Inactive	Protestant
4570	1	Pool de Lusa	999	Sankuru	Township	Female	Spouse of the household head	Congolaise	Catholic	6	No	457001	45700102	2	4570	1	2	Kasaî Oriental	Urban	Male	Catholic	Married (polygamous)	Public	40-44	8	8294.112805		2756812	175200	48000	815936	369200	0	0	0	8000	0	0	229360	4402508	Matched (3)	0	0	6	No	No	34	Public	Catholic
7680	1	Pool de Uvir	20	Sud-Kivu	Rural	Female	Child of the household head	Congolaise	Musulmane	6	Yes	768001	76800105	5	7680	1	5	Sud-Kivu	Rural	Male	Musulmane	Married (polygamous)	Informal agricultural	40-44	5			2756812	175200	48000	815936	369200	0	0	0	8000	0	0	229360	4402508	Matched (3)	0	0	6	Yes	Yes	7	Informal agricultural	Musulmane
340	1	Kinshasa Cluster	4	Kinshasa	Urban	Female	Spouse of the household head	Congolaise	Other Christian	6	No	34001	3400102	2	340	1	2	Kinshasa	Urban	Male	Other Christian	Married (monogamous)	Informal non-agricultural	50-54	7	162381.7101		2756812	175200	48000	815936	369200	0	0	0	8000	0	0	229360	4402508	Matched (3)	0	0	6	No	No	40	Informal non-agricultural	Other Christian
3920	1	Pool de Uvir	999	Sud-Kivu	Township	Male	Child of the household head	Congolaise	Protestant	6	Yes	392001	39200106	6	3920	1	6	Sud-Kivu	Urban	Male	Protestant	Married (monogamous)	Inactive	40-44	6			2756812	175200	48000	815936	369200	0	0	0	8000	0	0	229360	4402508	Matched (3)	0	0	6	Yes	Yes	10	Inactive	Protestant
1530	1	Pool de Beni	2	Nord-Kivu	Urban	Male	Chef de ménage	Congolaise	Protestant	6	No	153001	15300101	1	1530	1	1	Nord-Kivu	Urban	Male	Protestant	Single	Informal agricultural	35-39	1	20000		551440	0	0	14640	0	0	0	0	0	0	0	0	566080	Matched (3)	0	0	6	No	No	38	Informal agricultural	Protestant
3170	1	Pool de Keng	18	Kwango	Township	Male	Child of the household head	Congolaise	Catholic	6	No	317001	31700103	3	3170	1	3	Bandundu	Urban	Male	Catholic	Married (monogamous)	Public	55-59	9	72000	15450.71926	2756812	175200	48000	815936	369200	0	0	0	8000	0	0	229360	4402508	Matched (3)	0	0	6	No	No	24	Public	Catholic
7660	1	Pool de Beni	4	Nord-Kivu	Rural	Female	Spouse of the household head	Congolaise	Protestant	6	No	766001	76600102	2	7660	1	2	Nord-Kivu	Rural	Male	Protestant	Married (monogamous)	Informal agricultural	35-39	7	15000		1225121	0	102200	163249	280086	79829	28000	0	40200	43000	5400	27814	1994899	Matched (3)	2.155497	2.155497	6	No	No	33	Informal agricultural	Protestant
9620	1	Pool de Kana	999	Kasai-Centra	Rural	Female	Other parent	Congolaise	Other Christian	6	Yes	962001	96200108	8	9620	1	8	Kasaî occidental	Rural	Male	Other Christian	Married (monogamous)	Informal agricultural	45-49	10	5000	6734.922914	2756812	175200	48000	815936	369200	0	0	0	8000	0	0	229360	4402508	Matched (3)	0	0	6	Yes	Yes	18	Informal agricultural	Other Christian
8200	1	Pool de Kasa	999	Lualaba	Rural	Male	Chef de ménage	Congolaise	Catholic	6	No	820001	82000101	1	8200	1	1	Katanga	Rural	Male	Catholic	Married (monogamous)	Informal non-agricultural	45-49	6	16450.63025		1060080	0	14200	74452	12200	0	0	0	5500	15500	0	0	1181932	Matched (3)	1.311413	1.311413	6	No	No	49	Informal non-agricultural	Catholic
7080	1	Isiro Cluster	1	Haut-Uele	Rural	Female	Child of the household head	Congolaise	Catholic	6	No	708001	70800103	3	7080	1	3	Province Orientale	Rural	Male	Catholic	Married (monogamous)	Inactive	50-54	3	1000		2756812	175200	48000	815936	369200	0	0	0	8000	0	0	229360	4402508	Matched (3)	0	0	6	No	No	21	Inactive	Catholic
630	1	Pool de Boma	64	Kongo Centra	Urban	Male	Child of the household head	Congolaise	Other Christian	6	Yes	63001	6300103	3	630	1	3	Bas-Congo	Urban	Male	Other Christian	Cohabiting	Formal private sector	30-34	8			2756812	175200	48000	815936	369200	0	0	0	8000	0	0	229360	4402508	Matched (3)	0	0	6	Yes	Yes	12	Formal private sector	Other Christian
1100	1	Pool de Mban	4	Equateur	Urban	Female	Child of the household head	Congolaise	Protestant	6	No	110001	11000103	3	1100	1	3	Equateur	Urban	Male	Protestant	Married (monogamous)	Informal non-agricultural	45-49	12			2756812	175200	48000	815936	369200	0	0	0	8000	0	0	229360	4402508	Matched (3)	0	0	6	No	No	13	Informal non-agricultural	Protestant
190	1	Kinshasa Cluster	2	Kinshasa	Urban	Female	Spouse of the household head	Congolaise	Other Christian	6	No	19001	1900102	2	190	1	2	Kinshasa	Urban	Male	Catholic	Married (monogamous)	Public	45-49	9			2756812	175200	48000	815936	369200	0	0	0	8000	0	0	229360	4402508	Matched (3)	0	0	6	No	No	34	Public	Other Christian
7780	1	Pool de Buka	6	Sud-Kivu	Rural	Male	Child of the household head	Congolaise	Kimbanguist	6	No	778001	77800103	3	7780	1	3	Sud-Kivu	Rural	Male	Protestant	Married (monogamous)	Informal agricultural	50-54	5			2756812	175200	48000	815936	369200	0	0	0	8000	0	0	229360	4402508	Matched (3)	0	0	6	No	No	22	Informal agricultural	Kimbanguist
7970	1	Pool de Kind	3	Maniema	Rural	Female	Child of the household head	Congolaise	Catholic	6	No	797001	79700104	4	7970	1	4	Maniema	Rural	Male	Catholic	Married (polygamous)	Inactive	50-54	11			2756812	175200	48000	815936	369200	0	0	0	8000	0	0	229360	4402508	Matched (3)	0	0	6	No	No	26	Inactive	Catholic
4610	1	Pool de Lusa	999	Sankuru	Township	Female	Spouse of the household head	Congolaise	Other Christian	6	No	461001	46100102	2	4610	1	2	Kasaî Oriental	Urban	Male	None	Married (polygamous)	Public	50-54	13	35000		432420	35380	34000	9974	9688	3220	0	0	0	0	0	10200	534882	Matched (3)	0	0	6	No	No	43	Public	Other Christian
3330	1	Pool de Gbad	25	Nord-Ubangi	Township	Male	Chef de ménage	Congolaise	Catholic	6	No	333001	33300101	1	3330	1	1	Equateur	Urban	Male	Catholic	Married (monogamous)	Informal non-agricultural	45-49	10	54000	10000	2756812	175200	48000	815936	369200	0	0	0	8000	0	0	229360	4402508	Matched (3)	0	0	6	No	No	49	Informal non-agricultural	Catholic
7340	1	Pool de Buta	2	Bas-Uele	Rural	Female	Other parent	Congolaise	Catholic	6	Yes	734001	73400105	5	7340	1	5	Province Orientale	Rural	Male	Catholic	Married (monogamous)	Informal agricultural	30-34	8			2756812	175200	48000	815936	369200	0	0	0	8000	0	0	229360	4402508	Matched (3)	0	0	6	Yes	Yes	13	Informal agricultural	Catholic
4610	1	Pool de Lusa	999	Sankuru	Township	Male	Chef de ménage	Congolaise	None	6	No	461001	46100101	1	4610	1	1	Kasaî Oriental	Urban	Male	None	Married (polygamous)	Public	50-54	13	55960	12326.65589	2756812	175200	48000	815936	369200	0	0	0	8000	0	0	229360	4402508	Matched (3)	0	0	6	No	No	54	Public	None
3490	1	Pool de Bas	3	Tshopo	Township	Male	Chef de ménage	Congolaise	Other religion	6	No	349001	34900101	1	3490	1	1	Province Orientale	Urban	Male	Other religion	Married (monogamous)	Public	45-49	10	119000		2756812	175200	48000	815936	369200	0	0	0	8000	0	0	229360	4402508	Matched (3)	0	0	6	No	No	48	Public	Other religion
2740	1	Pool de Tshi	999	Kasai	Urban	Female	Spouse of the household head	Congolaise	Other Christian	6	No	274001	27400102	2	2740	1	2	Kasaî occidental	Urban	Male	Other Christian	Married (monogamous)	Informal non-agricultural	40-44	6	70000		2756812	175200	48000	815936	369200	0	0	0	8000	0	0	229360	4402508	Matched (3)	0	0	6	No	No	34	Informal non-agricultural	Other Christian
4770	1	Pool de Kana	999	Kasai-Centra	Township	Male	Child of the household head	Congolaise	Other Christian	6	Yes	477001	47700105	5	4770	1	5	Kasaî occidental	Urban	Male	Other Christian	Married (monogamous)	Inactive	45-49	9			2756812	175200	48000	815936	369200	0	0	0	8000	0	0	229360	4402508	Matched (3)	0	0	6	Yes	Yes	10	Inactive	Other Christian
3730	1	Pool de Buta	9	Bas-Uele	Township	Male	Child of the household head	Congolaise	Protestant	6	Yes	373001	37300103	3	3730	1	3	Province Orientale	Urban	Male	Protestant	Married (monogamous)	Informal agricultural	35-39	5			2756812	175200	48000	815936	369200	0	0	0	8000	0	0	229360	4402508	Matched (3)	0	0	6	Yes	Yes	9	Informal agricultural	Protestant
4064	1	Pool de Kolw	1	Lualaba	Township	Male	Chef de ménage	Congolaise	Other Christian	6	No	406401	40640101	1	4064	1	1	Katanga	Urban	Male	Other Christian	Married (polygamous)	Informal non-agricultural	45-49	4	420000		2756812	175200	48000	815936	369200	0	0	0	8000	0	0	229360	4402508	Matched (3)	0	0	6	No	No	46	Informal non-agricultural	Other Christian
3244	1	Pool de Geme	28	Sud-Ubangi	Township	Female	Child of the household head	Congolaise	Protestant	6	Yes	324401	32440103	3	3244	1	3	Equateur	Urban	Male	Protestant	Married (monogamous)	Informal agricultural	40-44	7			2756812	175200	48000	815936	369200	0	0	0	8000	0	0	229360	4402508	Matched (3)	0	0	6	Yes	Yes	9	Informal agricultural	Protestant
1150	1	Pool de Zong	116	Sud-Ubangi	Urban	Male	Chef de ménage	Congolaise	Catholic	6	No	115001	11500101	1	1150	1	1	Equateur	Urban	Male	Catholic	Married (polygamous)	Public	40-44	5	65000		2756812	175200	48000	815936	369200	0	0	0	8000	0	0	229360	4402508	Matched (3)	0	0	6	No	No	40	Public	Catholic
3340	1	Pool de Gbad	18	Nord-Ubangi	Township	Female	Spouse of the household head	Congolaise	Other Christian	6	No	334001	33400102	2	3340	1	2	Equateur	Urban	Male	Other Christian	Married (monogamous)	Informal agricultural	45-49	3	10336.07196		2756812	175200	48000	815936	369200	0	0	0	8000	0	0	229360	4402508	Matched (3)	0	0	6	No	No	49	Informal agricultural	Other Christian
4062	1	Pool de Kolw	999	Lualaba	Township	Female	Spouse of the household head	Congolaise	Protestant	6	No	406201	40620102	2	4062	1	2	Katanga	Urban	Male	Protestant	Married (monogamous)	Informal non-agricultural	30-34	7			2756812	175200	48000	815936	369200	0	0	0	8000	0	0	229360	4402508	Matched (3)	0	0	6	No	No	28	Informal non-agricultural	Protestant
3530	1	Pool de Bun	5	Ituri	Township	Male	Child of the household head	Congolaise	Catholic	6	No	353001	35300105	5	3530	1	5	Province Orientale	Urban	Male	Catholic	Married (monogamous)	Formal private sector	65-69	10	25000		2756812	175200	48000	815936	369200	0	0	0	8000	0	0	229360	4402508	Matched (3)	0	0	6	No	No	17	Formal private sector	Catholic
8030	1	Pool de Pun	1	Maniema	Rural	Male	Child of the household head	Congolaise	Protestant	6	Yes	803001	80300110	10	8030	1	10	Maniema	Rural	Male	Protestant	Married (monogamous)	Informal agricultural	65-69	15			2756812	175200	48000	815936	369200	0	0	0	8000	0	0	229360	4402508	Matched (3)	0	0	6	Yes	Yes	19	Informal agricultural	Protestant
6260	1	Pool de Gbad	15	Nord-Ubangi	Rural	Male	Child of the household head	Congolaise	Other Christian	6	Yes	626001	62600105	5	6260	1	5	Equateur	Rural	Male	Other Christian	Married (monogamous)	Informal non-agricultural	40-44	7			280920	0	2000	13927	23180	0	0	0	0	0	0	104920	424947	Matched (3)	0	0	6	Yes	Yes	14	Informal non-agricultural	Other Christian
6080	1	Pool de Gbad	2	Nord-Ubangi	Rural	Female	Child of the household head	Congolaise	Protestant	6	Yes	608001	60800105	5	6080	1	5	Equateur	Rural	Male	Protestant	Married (monogamous)	Informal agricultural	45-49	8			2756812	175200	48000	815936	369200	0	0	0	8000	0	0	229360	4402508	Matched (3)	0	0	6	Yes	Yes	12	Informal agricultural	Protestant
6040	1	Pool de Geme	13	Sud-Ubangi	Rural	Male	Child of the household head	Congolaise	Other Christian	6	Yes	604001	60400103	3	6040	1	3	Equateur	Rural	Male	Other Christian	Married (monogamous)	Informal agricultural	40-44	11	80000		2756812	175200	48000	815936	369200	0	0	0	8000	0	0	229360	4402508	Matched (3)	0	0	6	Yes	Yes	20	Informal agricultural	Other Christian
9370	1	Pool de Mwen	999	Lomami	Rural	Male	Child of the household head	Congolaise	Other Christian	6	Yes	937001	93700104	4	9370	1	4	Kasaî Oriental	Rural	Male	Other Christian	Married (monogamous)	Informal agricultural	40-44	9			2756812	175200	48000	815936	369200	0	0	0	8000	0	0	229360	4402508	Matched (3)	0	0	6	Yes	Yes	12	Informal agricultural	Other Christian
3760	1	Pool de Buta	9	Bas-Uele	Township	Male	Child of the household head	Congolaise	Protestant	6	Yes	376001	37600104	4	3760	1	4	Province Orientale	Urban	Male	Protestant	Married (monogamous)	Public	60-64	10			2756812	175200	48000	815936	369200	0	0	0	8000	0	0	229360	4402508	Matched (3)	0	0	6	Yes	Yes	22	Public	Protestant
4250	1	Pool de Kale	999	Tanganyka	Township	Female	Spouse of the household head	Congolaise	Catholic	6	No	425001	42500102	2	4250	1	2	Katanga	Urban	Male	Catholic	Married (monogamous)	Informal agricultural	25-29	2			2756812	175200	48000	815936	369200	0	0	0	8000	0	0	229360	4402508	Matched (3)	0	0	6	No	No	20	Informal agricultural	Catholic
2370	1	Mbuji-Mayi Cluster	999	Kasai-Orient	Urban	Male	Child of the household head	Congolaise	Protestant	6	Yes	237001	23700108	8	2370	1	8	Kasaî Oriental	Urban	Male	Protestant	Married (monogamous)	Public	55-59	8			1345050	0	0	477553	23529	0	0	0	0	0	0	0	1846132	Matched (3)	0	0	6	Yes	Yes	9	Public	Protestant
3402	1	Pool de Lisa	8	Mongala	Township	Male	Child of the household head	Congolaise	Protestant	6	No	340201	34020102	2	3402	1	2	Equateur	Urban	Female	Protestant	Cohabiting	Inactive	35-39	7			2756812	175200	48000	815936	369200	0	0	0	8000	0	0	229360	4402508	Matched (3)	0	0	6	No	No	10	Inactive	Protestant
7630	1	Pool de Beni	2	Nord-Kivu	Rural	Female	Child of the household head	Congolaise	Protestant	6	Yes	763001	76300103	3	7630	1	3	Nord-Kivu	Rural	Male	Protestant	Married (monogamous)	Informal agricultural	25-29	7			2756812	175200	48000	815936	369200	0	0	0	8000	0	0	229360	4402508	Matched (3)	0	0	6	Yes	Yes	11	Informal agricultural	Protestant
2740	1	Pool de Tshi	999	Kasai	Urban	Female	Other parent	Congolaise	Other Christian	6	Yes	274001	27400104	4	2740	1	4	Kasaî occidental	Urban	Male	Other Christian	Married (monogamous)	Informal non-agricultural	40-44	6			2756812	175200	48000	815936	369200	0	0	0	8000	0	0	229360	4402508	Matched (3)	0	0	6	Yes	Yes	18	Informal non-agricultural	Other Christian
7000	1	Pool de Bun	2	Ituri	Rural	Male	Chef de ménage	Congolaise	Catholic	6	No	700001	70000101	1	7000	1	1	Province Orientale	Rural	Male	Catholic	Married (monogamous)	Informal agricultural	30-34	4	15147.78321		2756812	175200	48000	815936	369200	0	0	0	8000	0	0	229360	4402508	Matched (3)	0	0	6	No	No	30	Informal agricultural	Catholic
8370	1	Pool de Kami	3	Haut-Lomami	Rural	Female	Spouse of the household head	Congolaise	Other Christian	6	No	837001	83700103	3	8370	1	3	Katanga	Rural	Male	Other Christian	Married (polygamous)	Informal agricultural	45-49	7	96673.66724		2756812	175200	48000	815936	369200	0	0	0	8000	0	0	229360	4402508	Matched (3)	0	0	6	No	No	26	Informal agricultural	Other Christian
2200	1	Pool de Lika	999	Haut-Katanga	Urban	Female	Child of the household head	Congolaise	Other Christian	6	Yes	220001	22000106	6	2200	1	6	Katanga	Urban	Male	Other Christian	Married (monogamous)	Informal non-agricultural	45-49	8			2756812	175200	48000	815936	369200	0	0	0	8000	0	0	229360	4402508	Matched (3)	0	0	6	Yes	Yes	19	Informal non-agricultural	Other Christian
4070	1	Pool de Kasa	999	Lualaba	Township	Male	Chef de ménage	Congolaise	Catholic	6	No	407001	40700101	1	4070	1	1	Katanga	Urban	Male	Catholic	Married (monogamous)	Informal agricultural	20-24	2	1000		397720	0	82000	126572	314280	31500	4000	0	0	0	0	35000	991072	Matched (3)	0	0	6	No	No	22	Informal agricultural	Catholic
1370	1	Kisangani Cluster	1	Tshopo	Urban	Female	Spouse of the household head	Congolaise	Other Christian	6	No	137001	13700102	2	1370	1	2	Province Orientale	Urban	Male	Other Christian	Married (monogamous)	Informal agricultural	65-69	4			1282525	0	0	305435	48800	0	0	15250	0	0	0	0	1652010	Matched (3)	0	0	6	No	No	63	Informal agricultural	Other Christian
5820	1	Pool de Basa	999	Equateur	Rural	Male	Chef de ménage	Congolaise	Other Christian	6	No	582001	58200101	1	5820	1	1	Equateur	Rural	Male	Other Christian	Married (monogamous)	Informal agricultural	25-29	7	42611.5148		2756812	175200	48000	815936	369200	0	0	0	8000	0	0	229360	4402508	Matched (3)	0	0	6	No	No	29	Informal agricultural	Other Christian
4630	1	Pool de Kabi	999	Lomami	Township	Female	Spouse of the household head	Congolaise	Other Christian	6	No	463001	46300102	2	4630	1	2	Kasaî occidental	Urban	Male	Catholic	Married (monogamous)	Public	40-44	6	56000		2756812	175200	48000	815936	369200	0	0	0	8000	0	0	229360	4402508	Matched (3)	0	0	6	No	No	29	Public	Other Christian
3950	1	Pool de Uvir	24	Sud-Kivu	Township	Male	Child of the household head	Congolaise	Other Christian	6	Yes	395001	39500104	4	3950	1	4	Sud-Kivu	Urban	Male	Other Christian	Married (monogamous)	Chomeurs	55-59	5			2756812	175200	48000	815936	369200	0	0	0	8000	0	0	229360	4402508	Matched (3)	0	0	6	Yes	Yes	10	Chomeurs	Other Christian
3200	1	Pool de Basa	47	Equateur	Township	Male	Other parent	Congolaise	Protestant	6	Yes	320001	32000104	4	3200	1	4	Equateur	Urban	Male	Other Christian	Cohabiting	Informal non-agricultural	30-34	5	101210.966		2756812	175200	48000	815936	369200	0	0	0	8000	0	0	229360	4402508	Matched (3)	0	0	6	Yes	Yes	22	Informal non-agricultural	Protestant
120	1	Kinshasa Cluster	14	Kinshasa	Urban	Male	Child of the household head	Congolaise	Animist	6	Yes	12001	1200105	5	120	1	5	Kinshasa	Urban	Female	Animist	Widowed	Informal non-agricultural	50-54	9			2756812	175200	48000	815936	369200	0	0	0	8000	0	0	229360	4402508	Matched (3)	0	0	6	Yes	Yes	18	Informal non-agricultural	Animist
8430	1	Pool de Kami	999	Haut-Lomami	Rural	Female	Child of the household head	Congolaise	Protestant	6	Yes	843001	84300105	5	8430	1	5	Katanga	Rural	Male	Protestant	Married (monogamous)	Informal agricultural	55-59	11			2756812	175200	48000	815936	369200	0	0	0	8000	0	0	229360	4402508	Matched (3)	0	0	6	Yes	Yes	11	Informal agricultural	Protestant
8030	1	Pool de Pun	1	Maniema	Rural	Male	Child of the household head	Congolaise	Protestant	6	No	803001	80300105	5	8030	1	5	Maniema	Rural	Male	Protestant	Married (monogamous)	Informal agricultural	65-69	15			2756812	175200	48000	815936	369200	0	0	0	8000	0	0	229360	4402508	Matched (3)	0	0	6	No	No	33	Informal agricultural	Protestant
6670	1	Pool de Bas	2	Tshopo	Rural	Female	Other parent	Congolaise	Other religion	6	No	667001	66700103	3	6670	1	3	Province Orientale	Rural	Male	Other religion	Married (monogamous)	Informal agricultural	40-44	5	15000		693992	0	0	49441	0	0	0	0	0	0	0	45046	788480	Matched (3)	0	0	6	No	No	31	Informal agricultural	Other religion
6810	1	Pool de Bas	2	Tshopo	Rural	Male	Chef de ménage	Congolaise	Protestant	6	No	681001	68100101	1	6810	1	1	Province Orientale	Rural	Male	Protestant	Cohabiting	Informal non-agricultural	20-24	3	15218.1322	44846.75471	1141940	0	53000	149778	38820	78000	44000	0	6000	26000	5660	9000	1552198	Matched (3)	1.675044	1.675044	6	No	No	23	Informal non-agricultural	Protestant
3413	1	Pool de Boku	4	Tshuapa	Township	Female	Child of the household head	Congolaise	Other Christian	6	Yes	341301	34130104	4	3413	1	4	Equateur	Urban	Male	Other Christian	Married (monogamous)	Informal non-agricultural	50-54	6	5000		2756812	175200	48000	815936	369200	0	0	0	8000	0	0	229360	4402508	Matched (3)	0	0	6	Yes	Yes	17	Informal non-agricultural	Other Christian
2220	1	Pool de Lika	999	Haut-Katanga	Urban	Male	Child of the household head	Congolaise	Other Christian	6	Yes	222001	22200106	6	2220	1	6	Katanga	Urban	Male	Other Christian	Married (monogamous)	Public	45-49	9			2756812	175200	48000	815936	369200	0	0	0	8000	0	0	229360	4402508	Matched (3)	0	0	6	Yes	Yes	11	Public	Other Christian
6500	1	Pool de Boku	2	Tshuapa	Rural	Male	Child of the household head	Congolaise	Catholic	6	Yes	650001	65000105	5	6500	1	5	Equateur	Rural	Male	Catholic	Married (monogamous)	Public	35-39	11			2756812	175200	48000	815936	369200	0	0	0	8000	0	0	229360	4402508	Matched (3)	0	0	6	Yes	Yes	14	Public	Catholic
8030	1	Pool de Pun	1	Maniema	Rural	Male	Child of the household head	Congolaise	Protestant	6	Yes	803001	80300111	11	8030	1	11	Maniema	Rural	Male	Protestant	Married (monogamous)	Informal agricultural	65-69	15			2756812	175200	48000	815936	369200	0	0	0	8000	0	0	229360	4402508	Matched (3)	0	0	6	Yes	Yes	17	Informal agricultural	Protestant
2892	1	Pool de Song	2	Kongo Centra	Township	Male	Child of the household head	Congolaise	Kimbanguist	6	Yes	289201	28920105	5	2892	1	5	Bas-Congo	Urban	Male	Kimbanguist	Married (monogamous)	Public	45-49	8			1496400	0	46200	13927	31167	8600	1600	0	2200	0	0	0	1600094	Matched (3)	0	0	6	Yes	Yes	11	Public	Kimbanguist
2500	1	Pool de Mwen	22	Lomami	Urban	Female	Child of the household head	Congolaise	Other religion	6	Yes	250001	25000104	4	2500	1	4	Kasaî Oriental	Urban	Male	Other religion	Married (monogamous)	Informal non-agricultural	40-44	6			2756812	175200	48000	815936	369200	0	0	0	8000	0	0	229360	4402508	Matched (3)	0	0	6	Yes	Yes	12	Informal non-agricultural	Other religion
620	1	Pool de Boma	9	Kongo Centra	Urban	Female	Spouse of the household head	Congolaise	Catholic	6	No	62001	6200102	2	620	1	2	Bas-Congo	Urban	Male	Catholic	Married (monogamous)	Chomeurs	60-64	3	60000		2756812	175200	48000	815936	369200	0	0	0	8000	0	0	229360	4402508	Matched (3)	0	0	6	No	No	55	Chomeurs	Catholic
4310	1	Pool de Kase	999	Haut-Katanga	Township	Male	Child of the household head	Congolaise	Catholic	6	No	431001	43100103	3	4310	1	3	Katanga	Urban	Male	Catholic	Married (monogamous)	Public	50-54	8	327414.737		966240	1080920	0	558219	0	0	234240	0	0	0	80520	0	2920139	Matched (3)	0	0	6	No	No	27	Public	Catholic
8140	1	Pool de Kasa	999	Lualaba	Rural	Male	Chef de ménage	Congolaise	Other Christian	6	No	814001	81400101	1	8140	1	1	Katanga	Rural	Male	Other Christian	Married (monogamous)	Public	45-49	6	138875.8098		2756812	175200	48000	815936	369200	0	0	0	8000	0	0	229360	4402508	Matched (3)	0	0	6	No	No	48	Public	Other Christian
3500	1	Pool de Bas	9	Tshopo	Township	Male	Chef de ménage	Congolaise	Catholic	6	No	350001	35000101	1	3500	1	1	Province Orientale	Urban	Male	Catholic	Married (monogamous)	Public	30-34	4	135000		1057740	58560	0	190699	0	65880	97600	0	2440	0	0	0	1472919	Matched (3)	0	0	6	No	No	34	Public	Catholic
3770	1	Pool de Beni	2	Nord-Kivu	Township	Male	Chef de ménage	Congolaise	Catholic	6	No	377001	37700101	1	3770	1	1	Nord-Kivu	Urban	Male	Catholic	Married (monogamous)	Informal non-agricultural	20-24	3	45846.43262		2756812	175200	48000	815936	369200	0	0	0	8000	0	0	229360	4402508	Matched (3)	0	0	6	No	No	24	Informal non-agricultural	Catholic
1310	1	Pool de Gbad	19	Nord-Ubangi	Urban	Female	Child of the household head	Congolaise	Missing	6	Yes	131001	13100103	3	1310	1	3	Equateur	Urban	Male	Missing	Married (monogamous)	Public	30-34	4			2756812	175200	48000	815936	369200	0	0	0	8000	0	0	229360	4402508	Matched (3)	0	0	6	Yes	Yes	11	Public	Missing
4830	1	Pool de Mwek	29	Kasai	Township	Female	Child of the household head	Congolaise	Catholic	6	Yes	483001	48300108	8	4830	1	8	Kasaî occidental	Urban	Male	Catholic	Married (monogamous)	Informal non-agricultural	35-39	10			2756812	175200	48000	815936	369200	0	0	0	8000	0	0	229360	4402508	Matched (3)	0	0	6	Yes	Yes	8	Informal non-agricultural	Catholic
7810	1	Pool de Buka	4	Sud-Kivu	Rural	Male	Chef de ménage	Congolaise	Protestant	6	No	781001	78100101	1	7810	1	1	Sud-Kivu	Rural	Male	Protestant	Married (monogamous)	Chomeurs	40-44	6			2756812	175200	48000	815936	369200	0	0	0	8000	0	0	229360	4402508	Matched (3)	0	0	6	No	No	42	Chomeurs	Protestant
8770	1	Pool de Lubu	999	Haut-Katanga	Rural	Female	Child of the household head	Congolaise	Protestant	6	Yes	877001	87700103	3	8770	1	3	Katanga	Rural	Male	Protestant	Married (monogamous)	Informal agricultural	25-29	6			2756812	175200	48000	815936	369200	0	0	0	8000	0	0	229360	4402508	Matched (3)	0	0	6	Yes	Yes	9	Informal agricultural	Protestant
1420	1	Kisangani Cluster	18	Tshopo	Urban	Male	Other parent	Congolaise	Other Christian	6	No	142001	14200105	5	1420	1	5	Province Orientale	Urban	Male	Other Christian	Married (monogamous)	Public	35-39	7			2756812	175200	48000	815936	369200	0	0	0	8000	0	0	229360	4402508	Matched (3)	0	0	6	No	No	21	Public	Other Christian
3480	1	Pool de Bas	19	Tshopo	Township	Female	Child of the household head	Congolaise	Catholic	6	Yes	348001	34800106	6	3480	1	6	Province Orientale	Urban	Male	Catholic	Married (monogamous)	Public	60-64	6			2756812	175200	48000	815936	369200	0	0	0	8000	0	0	229360	4402508	Matched (3)	0	0	6	Yes	Yes	8	Public	Catholic
7340	1	Pool de Buta	2	Bas-Uele	Rural	Male	Other parent	Congolaise	Catholic	6	Yes	734001	73400104	4	7340	1	4	Province Orientale	Rural	Male	Catholic	Married (monogamous)	Informal agricultural	30-34	8			2756812	175200	48000	815936	369200	0	0	0	8000	0	0	229360	4402508	Matched (3)	0	0	6	Yes	Yes	20	Informal agricultural	Catholic
2260	1	Pool de Lubu	999	Haut-Katanga	Urban	Female	Spouse of the household head	Missing	Protestant	6	No	226001	22600102	2	2260	1	2	Katanga	Urban	Male	Protestant	Married (monogamous)	Informal non-agricultural	30-34	8			2756812	175200	48000	815936	369200	0	0	0	8000	0	0	229360	4402508	Matched (3)	0	0	6	No	No	26	Informal non-agricultural	Protestant
3440	1	Pool de Bas	2	Tshopo	Township	Female	Spouse of the household head	Congolaise	Protestant	6	No	344001	34400102	2	3440	1	2	Province Orientale	Urban	Male	Protestant	Married (monogamous)	Public	55-59	5			2756812	175200	48000	815936	369200	0	0	0	8000	0	0	229360	4402508	Matched (3)	0	0	6	No	No	55	Public	Protestant
4860	1	Pool de Mwek	48	Kasai	Township	Male	Chef de ménage	Congolaise	Other Christian	6	Yes	486001	48600101	1	4860	1	1	Kasaî occidental	Urban	Male	Other Christian	Married (monogamous)	Inactive	25-29	5			2756812	175200	48000	815936	369200	0	0	0	8000	0	0	229360	4402508	Matched (3)	0	0	6	Yes	Yes	29	Inactive	Other Christian
1210	1	Pool de Zong	15	Sud-Ubangi	Urban	Male	Child of the household head	Congolaise	Other Christian	6	No	121001	12100103	3	1210	1	3	Equateur	Urban	Male	Other Christian	Married (monogamous)	Informal agricultural	50-54	5	14000		2756812	175200	48000	815936	369200	0	0	0	8000	0	0	229360	4402508	Matched (3)	0	0	6	No	No	29	Informal agricultural	Other Christian
2340	1	Pool de Lubu	999	Haut-Katanga	Urban	Male	Child of the household head	Congolaise	Other Christian	6	No	234001	23400102	2	2340	1	2	Katanga	Urban	Female	Other Christian	Widowed	Informal non-agricultural	35-39	4			2756812	175200	48000	815936	369200	0	0	0	8000	0	0	229360	4402508	Matched (3)	0	0	6	No	No	12	Informal non-agricultural	Other Christian
7970	1	Pool de Kind	3	Maniema	Rural	Female	Child of the household head	Congolaise	Catholic	6	Yes	797001	79700106	6	7970	1	6	Maniema	Rural	Male	Catholic	Married (polygamous)	Inactive	50-54	11			2756812	175200	48000	815936	369200	0	0	0	8000	0	0	229360	4402508	Matched (3)	0	0	6	Yes	Yes	16	Inactive	Catholic
8030	1	Pool de Pun	1	Maniema	Rural	Male	Child of the household head	Congolaise	Protestant	6	Yes	803001	80300115	15	8030	1	15	Maniema	Rural	Male	Protestant	Married (monogamous)	Informal agricultural	65-69	15			1037400	0	0	964114	5200	0	0	0	0	0	0	0	2006714	Matched (3)	0	0	6	Yes	Yes	8	Informal agricultural	Protestant
9640	1	Pool de Kana	999	Kasai-Centra	Rural	Female	Child of the household head	Congolaise	Other Christian	6	No	964001	96400102	2	9640	1	2	Kasaî occidental	Rural	Female	Other Christian	Widowed	Informal agricultural	55-59	6	8000		2756812	175200	48000	815936	369200	0	0	0	8000	0	0	229360	4402508	Matched (3)	0	0	6	No	No	23	Informal agricultural	Other Christian
3270	1	Pool de Geme	15	Sud-Ubangi	Township	Male	Child of the household head	Congolaise	Catholic	6	Yes	327001	32700106	6	3270	1	6	Equateur	Urban	Female	Catholic	Divorced	Informal non-agricultural	45-49	10			1011880	0	85800	183145	111080	212000	56000	0	7300	130000	0	58000	1855205	Matched (3)	7.007311	7.007311	6	Yes	Yes	13	Informal non-agricultural	Catholic
180	1	Kinshasa Cluster	8	Kinshasa	Urban	Female	Spouse of the household head	Congolaise	Other Christian	6	No	18001	1800102	2	180	1	2	Kinshasa	Urban	Male	Other Christian	Married (monogamous)	Informal non-agricultural	55-59	14	14994.75236		2756812	175200	48000	815936	369200	0	0	0	8000	0	0	229360	4402508	Matched (3)	0	0	6	No	No	51	Informal non-agricultural	Other Christian
9200	1	Pool de Lodj	2	Sankuru	Rural	Male	Child of the household head	Congolaise	Other Christian	6	Yes	920001	92000104	4	9200	1	4	Kasaî Oriental	Rural	Male	Other Christian	Married (monogamous)	Informal agricultural	30-34	7			2756812	175200	48000	815936	369200	0	0	0	8000	0	0	229360	4402508	Matched (3)	0	0	6	Yes	Yes	7	Informal agricultural	Other Christian
2894	1	Pool de Song	8	Kongo Centra	Township	Male	Child of the household head	Congolaise	Other Christian	6	Yes	289401	28940104	4	2894	1	4	Bas-Congo	Urban	Male	Kimbanguist	Married (monogamous)	Informal agricultural	35-39	6			2756812	175200	48000	815936	369200	0	0	0	8000	0	0	229360	4402508	Matched (3)	0	0	6	Yes	Yes	6	Informal agricultural	Other Christian
4260	1	Pool de Mano	999	Tanganyka	Township	Male	Chef de ménage	Congolaise	Protestant	6	No	426001	42600101	1	4260	1	1	Katanga	Urban	Male	Protestant	Married (monogamous)	Informal non-agricultural	30-34	5	120000		2756812	175200	48000	815936	369200	0	0	0	8000	0	0	229360	4402508	Matched (3)	0	0	6	No	No	34	Informal non-agricultural	Protestant
2540	1	Pool de Mwen	999	Lomami	Urban	Male	Chef de ménage	Congolaise	Other Christian	6	No	254001	25400101	1	2540	1	1	Kasaî Oriental	Urban	Male	Other Christian	Married (monogamous)	Informal non-agricultural	30-34	10	60000		1756800	0	805200	158096	24400	0	0	0	0	0	0	0	2744496	Matched (3)	0	0	6	No	No	32	Informal non-agricultural	Other Christian
1830	1	Pool de Buka	42	Sud-Kivu	Urban	Female	Child of the household head	Congolaise	Catholic	6	Yes	183001	18300103	3	1830	1	3	Sud-Kivu	Urban	Male	Protestant	Divorced	Informal non-agricultural	35-39	8			183600	58560	0	195034	24400	0	0	0	0	0	0	0	461594	Matched (3)	0	0	6	Yes	Yes	13	Informal non-agricultural	Catholic
3380	1	Pool de Lisa	208	Mongala	Township	Male	Child of the household head	Congolaise	Catholic	6	Yes	338001	33800103	3	3380	1	3	Equateur	Urban	Male	Catholic	Married (polygamous)	Informal non-agricultural	65-69	9			2756812	175200	48000	815936	369200	0	0	0	8000	0	0	229360	4402508	Matched (3)	0	0	6	Yes	Yes	19	Informal non-agricultural	Catholic
8710	1	Pool de Lika	999	Haut-Katanga	Rural	Male	Child of the household head	Congolaise	Protestant	6	No	871001	87100104	4	8710	1	4	Katanga	Rural	Male	Protestant	Married (monogamous)	Informal agricultural	55-59	6			2756812	175200	48000	815936	369200	0	0	0	8000	0	0	229360	4402508	Matched (3)	0	0	6	No	No	21	Informal agricultural	Protestant
6000	1	Pool de Geme	5	Sud-Ubangi	Rural	Male	Child of the household head	Congolaise	Protestant	6	Yes	600001	60000104	4	6000	1	4	Equateur	Rural	Male	Protestant	Married (monogamous)	Informal non-agricultural	35-39	7			2756812	175200	48000	815936	369200	0	0	0	8000	0	0	229360	4402508	Matched (3)	0	0	6	Yes	Yes	12	Informal non-agricultural	Protestant
8210	1	Pool de Kasa	999	Lualaba	Rural	Female	Chef de ménage	Congolaise	Protestant	6	No	821001	82100101	1	8210	1	1	Katanga	Rural	Female	Protestant	Widowed	Informal non-agricultural	55-59	1	20000		2756812	175200	48000	815936	369200	0	0	0	8000	0	0	229360	4402508	Matched (3)	0	0	6	No	No	57	Informal non-agricultural	Protestant
9360	1	Pool de Mwen	999	Lomami	Rural	Male	Child of the household head	Congolaise	Protestant	6	Yes	936001	93600107	7	9360	1	7	Kasaî Oriental	Rural	Male	Protestant	Married (monogamous)	Public	60-64	7			2756812	175200	48000	815936	369200	0	0	0	8000	0	0	229360	4402508	Matched (3)	0	0	6	Yes	Yes	10	Public	Protestant
3590	1	Pool de Bun	20	Ituri	Township	Female	Spouse of the household head	Congolaise	Catholic	6	No	359001	35900102	2	3590	1	2	Province Orientale	Urban	Male	Catholic	Married (monogamous)	Informal non-agricultural	40-44	7			2155380	0	0	1181966	0	0	0	0	0	0	0	14640	3351986	Matched (3)	0	0	6	No	No	33	Informal non-agricultural	Catholic
4760	1	Pool de Kana	999	Kasai-Centra	Township	Male	Child of the household head	Congolaise	Other Christian	6	Yes	476001	47600113	13	4760	1	13	Kasaî occidental	Urban	Male	Other Christian	Married (monogamous)	Public	60-64	15			2756812	175200	48000	815936	369200	0	0	0	8000	0	0	229360	4402508	Matched (3)	0	0	6	Yes	Yes	18	Public	Other Christian
9320	1	Pool de Kabi	999	Lomami	Rural	Female	Child of the household head	Congolaise	Protestant	6	No	932001	93200103	3	9320	1	3	Kasaî occidental	Rural	Male	Protestant	Married (monogamous)	Informal agricultural	45-49	7	7928.652548		2756812	175200	48000	815936	369200	0	0	0	8000	0	0	229360	4402508	Matched (3)	0	0	6	No	No	20	Informal agricultural	Protestant
3510	1	Pool de Bun	15	Ituri	Township	Female	Child of the household head	Congolaise	Catholic	6	Yes	351001	35100111	11	3510	1	11	Province Orientale	Urban	Male	Catholic	Married (monogamous)	Public	60-64	18			2756812	175200	48000	815936	369200	0	0	0	8000	0	0	229360	4402508	Matched (3)	0	0	6	Yes	Yes	9	Public	Catholic
3600	1	Pool de Bun	39	Ituri	Township	Female	Child of the household head	Congolaise	Catholic	6	Yes	360001	36000105	5	3600	1	5	Province Orientale	Urban	Male	Catholic	Married (monogamous)	Chomeurs	45-49	5			2756812	175200	48000	815936	369200	0	0	0	8000	0	0	229360	4402508	Matched (3)	0	0	6	Yes	Yes	8	Chomeurs	Catholic
7980	1	Pool de Kind	3	Maniema	Rural	Female	Spouse of the household head	Congolaise	Other religion	6	No	798001	79800103	3	7980	1	3	Maniema	Rural	Male	Other Christian	Married (polygamous)	Informal agricultural	45-49	7	10000		2756812	175200	48000	815936	369200	0	0	0	8000	0	0	229360	4402508	Matched (3)	0	0	6	No	No	30	Informal agricultural	Other religion
1330	1	Pool de Gbad	3	Nord-Ubangi	Urban	Male	Child of the household head	Congolaise	Other Christian	6	Yes	133001	13300105	5	1330	1	5	Equateur	Urban	Male	Other Christian	Cohabiting	Informal agricultural	45-49	9			2756812	175200	48000	815936	369200	0	0	0	8000	0	0	229360	4402508	Matched (3)	0	0	6	Yes	Yes	10	Informal agricultural	Other Christian
3401	1	Pool de Lisa	24	Mongala	Township	Male	Other parent	Congolaise	Catholic	6	Yes	340101	34010105	5	3401	1	5	Equateur	Urban	Female	Catholic	Widowed	Inactive	70-74	5			2756812	175200	48000	815936	369200	0	0	0	8000	0	0	229360	4402508	Matched (3)	0	0	6	Yes	Yes	9	Inactive	Catholic
7210	1	Isiro Cluster	5	Haut-Uele	Rural	Female	Child of the household head	Congolaise	Catholic	6	Yes	721001	72100103	3	7210	1	3	Province Orientale	Rural	Male	Catholic	Married (monogamous)	Informal agricultural	50-54	4			625560	0	45200	16000	8300	14400	7200	8000	0	0	3000	44900	772560	Matched (3)	0	0	6	Yes	Yes	18	Informal agricultural	Catholic
2390	1	Mbuji-Mayi Cluster	999	Kasai-Orient	Urban	Male	Chef de ménage	Congolaise	Other Christian	6	No	239001	23900101	1	2390	1	1	Kasaî Oriental	Urban	Male	Other Christian	Married (monogamous)	Formal private sector	25-29	1	30000		2756812	175200	48000	815936	369200	0	0	0	8000	0	0	229360	4402508	Matched (3)	0	0	6	No	No	28	Formal private sector	Other Christian
4450	1	Mbuji-Mayi Cluster	999	Kasai-Orient	Township	Male	Child of the household head	Congolaise	Other Christian	6	Yes	445001	44500105	5	4450	1	5	Kasaî Oriental	Urban	Male	Other Christian	Married (monogamous)	Informal agricultural	55-59	9			2756812	175200	48000	815936	369200	0	0	0	8000	0	0	229360	4402508	Matched (3)	0	0	6	Yes	Yes	15	Informal agricultural	Other Christian
8980	1	Mbuji-Mayi Cluster	2	Kasai-Orient	Rural	Female	Child of the household head	Congolaise	Other Christian	6	Yes	898001	89800103	3	8980	1	3	Kasaî Oriental	Rural	Male	Other Christian	Married (monogamous)	Informal agricultural	35-39	5			567300	0	0	189897	19607	0	0	0	0	0	0	0	776804	Matched (3)	0	0	6	Yes	Yes	7	Informal agricultural	Other Christian
8760	1	Pool de Lubu	999	Haut-Katanga	Rural	Female	Spouse of the household head	Congolaise	Other Christian	6	No	876001	87600102	2	8760	1	2	Katanga	Rural	Male	Other Christian	Married (monogamous)	Informal agricultural	75-79	4			2756812	175200	48000	815936	369200	0	0	0	8000	0	0	229360	4402508	Matched (3)	0	0	6	No	No	72	Informal agricultural	Other Christian
300	1	Kinshasa Cluster	24	Kinshasa	Urban	Female	Spouse of the household head	Congolaise	Protestant	6	No	30001	3000102	2	300	1	2	Kinshasa	Urban	Male	Protestant	Married (monogamous)	Formal private sector	35-39	5			1738600	75640	362700	1010054	197600	70200	675621	168360	14340	65000	0	200340	4578456	Matched (3)	1.419693	1.419693	6	No	No	35	Formal private sector	Protestant
4721	1	Pool de Kana	999	Kasai-Centra	Township	Female	Child of the household head	Congolaise	Other Christian	6	Yes	472101	47210104	4	4721	1	4	Kasaî occidental	Urban	Male	Other Christian	Married (monogamous)	Informal agricultural	45-49	5			2756812	175200	48000	815936	369200	0	0	0	8000	0	0	229360	4402508	Matched (3)	0	0	6	Yes	Yes	12	Informal agricultural	Other Christian
9460	1	Pool de Mwen	999	Lomami	Rural	Male	Child of the household head	Congolaise	Protestant	6	Yes	946001	94600103	3	9460	1	3	Kasaî Oriental	Rural	Male	Protestant	Married (monogamous)	Informal agricultural	30-34	7			2756812	175200	48000	815936	369200	0	0	0	8000	0	0	229360	4402508	Matched (3)	0	0	6	Yes	Yes	7	Informal agricultural	Protestant
7160	1	Isiro Cluster	2	Haut-Uele	Rural	Female	Child of the household head	Congolaise	Protestant	6	Yes	716001	71600105	5	7160	1	5	Province Orientale	Rural	Male	Protestant	Married (monogamous)	Informal agricultural	50-54	9			2756812	175200	48000	815936	369200	0	0	0	8000	0	0	229360	4402508	Matched (3)	0	0	6	Yes	Yes	15	Informal agricultural	Protestant
3760	1	Pool de Buta	9	Bas-Uele	Township	Male	Child of the household head	Congolaise	Protestant	6	Yes	376001	37600103	3	3760	1	3	Province Orientale	Urban	Male	Protestant	Married (monogamous)	Public	60-64	10			2756812	175200	48000	815936	369200	0	0	0	8000	0	0	229360	4402508	Matched (3)	0	0	6	Yes	Yes	16	Public	Protestant
3404	1	Pool de Lisa	53	Mongala	Township	Female	Spouse of the household head	Congolaise	Other Christian	6	No	340401	34040102	2	3404	1	2	Equateur	Urban	Male	Other Christian	Married (monogamous)	Public	35-39	5			900800	0	56800	116213	271880	9400	86400	0	15000	0	164000	44800	1665293	Matched (3)	0	0	6	No	No	33	Public	Other Christian
3270	1	Pool de Geme	15	Sud-Ubangi	Township	Female	Other parent	Congolaise	Catholic	6	Yes	327001	32700107	7	3270	1	7	Equateur	Urban	Female	Catholic	Divorced	Informal non-agricultural	45-49	10			602935	0	402600	150777	122000	73200	0	190320	0	41480	0	45080	1628392	Matched (3)	2.547297	2.547297	6	Yes	Yes	6	Informal non-agricultural	Catholic
4770	1	Pool de Kana	999	Kasai-Centra	Township	Female	Child of the household head	Congolaise	Other Christian	6	Yes	477001	47700104	4	4770	1	4	Kasaî occidental	Urban	Male	Other Christian	Married (monogamous)	Inactive	45-49	9			2756812	175200	48000	815936	369200	0	0	0	8000	0	0	229360	4402508	Matched (3)	0	0	6	Yes	Yes	12	Inactive	Other Christian
3390	1	Pool de Lisa	37	Mongala	Township	Female	Child of the household head	Congolaise	Other Christian	6	Yes	339001	33900106	6	3390	1	6	Equateur	Urban	Male	Other Christian	Married (monogamous)	Informal non-agricultural	50-54	6			2756812	175200	48000	815936	369200	0	0	0	8000	0	0	229360	4402508	Matched (3)	0	0	6	Yes	Yes	11	Informal non-agricultural	Other Christian
8690	1	Pool de Lika	999	Haut-Katanga	Rural	Female	Spouse of the household head	Congolaise	Other religion	6	No	869001	86900102	2	8690	1	2	Katanga	Rural	Male	Other religion	Married (monogamous)	Informal agricultural	45-49	9	15777.63734		2756812	175200	48000	815936	369200	0	0	0	8000	0	0	229360	4402508	Matched (3)	0	0	6	No	No	39	Informal agricultural	Other religion
2892	1	Pool de Song	2	Kongo Centra	Township	Female	Child of the household head	Congolaise	Kimbanguist	6	Yes	289201	28920103	3	2892	1	3	Bas-Congo	Urban	Male	Kimbanguist	Married (monogamous)	Public	45-49	8			2756812	175200	48000	815936	369200	0	0	0	8000	0	0	229360	4402508	Matched (3)	0	0	6	Yes	Yes	14	Public	Kimbanguist
1020	1	Pool de Kikw	119	Kwilu	Urban	Female	Spouse of the household head	Congolaise	Catholic	6	No	102001	10200102	2	1020	1	2	Bandundu	Urban	Male	Catholic	Married (monogamous)	Informal non-agricultural	35-39	7			2756812	175200	48000	815936	369200	0	0	0	8000	0	0	229360	4402508	Matched (3)	0	0	6	No	No	32	Informal non-agricultural	Catholic
9850	1	Pool de Mwek	20	Kasai	Rural	Male	Child of the household head	Congolaise	Other Christian	6	Yes	985001	98500103	3	9850	1	3	Kasaî occidental	Rural	Male	Other Christian	Married (monogamous)	Informal agricultural	35-39	9			2756812	175200	48000	815936	369200	0	0	0	8000	0	0	229360	4402508	Matched (3)	0	0	6	Yes	Yes	15	Informal agricultural	Other Christian
8190	1	Pool de Kasa	999	Lualaba	Rural	Female	Child of the household head	Congolaise	Protestant	6	Yes	819001	81900103	3	8190	1	3	Katanga	Rural	Male	Protestant	Married (monogamous)	Informal agricultural	60-64	8			2756812	175200	48000	815936	369200	0	0	0	8000	0	0	229360	4402508	Matched (3)	0	0	6	Yes	Yes	20	Informal agricultural	Protestant
840	1	Pool de Band	36	Kwilu	Urban	Male	Chef de ménage	Congolaise	Protestant	6	No	84001	8400101	1	840	1	1	Bandundu	Urban	Male	Protestant	Married (monogamous)	Informal non-agricultural	40-44	5	50436.58449		439840	0	0	86497	0	0	0	0	0	0	0	0	526337	Matched (3)	0	0	6	No	No	40	Informal non-agricultural	Protestant
4550	1	Pool de Lodj	12	Sankuru	Township	Male	Other parent	Congolaise	Other religion	6	Yes	455001	45500103	3	4550	1	3	Kasaî Oriental	Urban	Male	Other religion	Married (monogamous)	Informal non-agricultural	25-29	3			2756812	175200	48000	815936	369200	0	0	0	8000	0	0	229360	4402508	Matched (3)	0	0	6	Yes	Yes	12	Informal non-agricultural	Other religion
2770	1	Pool de Tshi	999	Kasai	Urban	Female	Other parent	Congolaise	Other Christian	6	Yes	277001	27700102	2	2770	1	2	Kasaî occidental	Urban	Female	Other Christian	Widowed	Inactive	75-79	2			2756812	175200	48000	815936	369200	0	0	0	8000	0	0	229360	4402508	Matched (3)	0	0	6	Yes	Yes	17	Inactive	Other Christian
2670	1	Pool de Kana	999	Kasai-Centra	Urban	Male	Child of the household head	Congolaise	Other religion	6	Yes	267001	26700104	4	2670	1	4	Kasaî occidental	Urban	Male	Other religion	Married (monogamous)	Inactive	40-44	7			1286229	0	0	431220	0	0	0	0	0	0	0	0	1717448	Matched (3)	0	0	6	Yes	Yes	12	Inactive	Other religion
2310	1	Pool de Lubu	54	Haut-Katanga	Urban	Male	Child of the household head	Congolaise	Catholic	6	Yes	231001	23100103	3	2310	1	3	Katanga	Urban	Male	Catholic	Married (monogamous)	Informal non-agricultural	60-64	11			1200843	20914	0	204211	0	0	0	0	0	0	0	0	1425969	Matched (3)	0	0	6	Yes	Yes	23	Informal non-agricultural	Catholic
3241	1	Pool de Geme	29	Sud-Ubangi	Township	Male	Child of the household head	Congolaise	Protestant	6	Yes	324101	32410102	2	3241	1	2	Equateur	Urban	Female	Catholic	Widowed	Informal agricultural	45-49	7			2756812	175200	48000	815936	369200	0	0	0	8000	0	0	229360	4402508	Matched (3)	0	0	6	Yes	Yes	22	Informal agricultural	Protestant
1920	1	Pool de Buka	37	Sud-Kivu	Urban	Male	Chef de ménage	Congolaise	Catholic	6	No	192001	19200101	1	1920	1	1	Sud-Kivu	Urban	Male	Catholic	Married (monogamous)	Chomeurs	30-34	9			594140	200080	61000	177543	61000	0	390400	0	14640	0	0	43920	1542723	Matched (3)	0	0	6	No	No	32	Chomeurs	Catholic
5150	1	Pool de Band	2	Mai-Ndombe	Rural	Female	Child of the household head	Congolaise	Protestant	6	Yes	515001	51500102	2	5150	1	2	Bandundu	Rural	Male	Other Christian	Widowed	Public	40-44	5			2756812	175200	48000	815936	369200	0	0	0	8000	0	0	229360	4402508	Matched (3)	0	0	6	Yes	Yes	13	Public	Protestant
3000	1	Pool de Band	3	Kwilu	Township	Male	Child of the household head	Congolaise	Other religion	6	Yes	300001	30000104	4	3000	1	4	Bandundu	Urban	Male	Catholic	Married (monogamous)	Public	70-74	6			2756812	175200	48000	815936	369200	0	0	0	8000	0	0	229360	4402508	Matched (3)	0	0	6	Yes	Yes	13	Public	Other religion
760	1	Pool de Mata	22	Kongo Centra	Urban	Male	Child of the household head	Congolaise	Other Christian	6	Yes	76001	7600105	5	760	1	5	Bas-Congo	Urban	Male	Other Christian	Married (monogamous)	Inactive	50-54	6			2756812	175200	48000	815936	369200	0	0	0	8000	0	0	229360	4402508	Matched (3)	0	0	6	Yes	Yes	14	Inactive	Other Christian
3560	1	Pool de Bun	10	Ituri	Township	Male	Other person	Congolaise	Catholic	6	No	356001	35600105	5	3560	1	5	Province Orientale	Urban	Male	Musulmane	Married (monogamous)	Informal non-agricultural	65-69	6	50000		1905152	0	0	457211	70760	0	0	0	0	0	0	21960	2455083	Matched (3)	0	0	6	No	No	26	Informal non-agricultural	Catholic
6250	1	Pool de Gbad	7	Nord-Ubangi	Rural	Female	Child of the household head	Congolaise	Protestant	6	Yes	625001	62500103	3	6250	1	3	Equateur	Rural	Male	Protestant	Divorced	Informal agricultural	35-39	3			1563244	0	129000	280580	57920	73360	30000	0	9000	0	0	20000	2163104	Matched (3)	0	0	6	Yes	Yes	9	Informal agricultural	Protestant
4061	1	Pool de Kolw	999	Lualaba	Township	Male	Chef de ménage	Congolaise	Catholic	6	No	406101	40610101	1	4061	1	1	Katanga	Urban	Male	Catholic	Married (monogamous)	Informal non-agricultural	45-49	4	342000	370000	1022360	0	0	148127	4880	0	0	0	0	0	0	0	1175367	Matched (3)	0	0	6	No	No	45	Informal non-agricultural	Catholic
2200	1	Pool de Lika	999	Haut-Katanga	Urban	Male	Child of the household head	Congolaise	Other Christian	6	Yes	220001	22000103	3	2200	1	3	Katanga	Urban	Male	Other Christian	Married (monogamous)	Informal non-agricultural	45-49	8			2756812	175200	48000	815936	369200	0	0	0	8000	0	0	229360	4402508	Matched (3)	0	0	6	Yes	Yes	16	Informal non-agricultural	Other Christian
710	1	Pool de Mata	214	Kongo Centra	Urban	Female	Other parent	Congolaise	Other Christian	6	Yes	71001	7100107	7	710	1	7	Bas-Congo	Urban	Male	Catholic	Married (monogamous)	Public	55-59	10			2756812	175200	48000	815936	369200	0	0	0	8000	0	0	229360	4402508	Matched (3)	0	0	6	Yes	Yes	9	Public	Other Christian
4700	1	Pool de Mwen	999	Lomami	Township	Female	Spouse of the household head	Congolaise	Catholic	6	No	470001	47000102	2	4700	1	2	Kasaî Oriental	Urban	Male	Catholic	Married (monogamous)	Informal non-agricultural	20-24	4			2756812	175200	48000	815936	369200	0	0	0	8000	0	0	229360	4402508	Matched (3)	0	0	6	No	No	21	Informal non-agricultural	Catholic
2900	1	Pool de INo	40	Mai-Ndombe	Township	Male	Chef de ménage	Congolaise	Catholic	6	No	290001	29000101	1	2900	1	1	Bandundu	Urban	Male	Catholic	Married (polygamous)	Public	75-79	4	68250		3646240	590480	102400	618560	354760	48200	0	331236	24040	0	773600	479860	6969376	Matched (3)	0	0	6	No	No	76	Public	Catholic
3020	1	Pool de Band	22	Kwilu	Township	Male	Child of the household head	Congolaise	Catholic	6	Yes	302001	30200103	3	3020	1	3	Bandundu	Urban	Male	Musulmane	Cohabiting	Inactive	25-29	7			531920	0	0	13927	0	0	0	0	0	0	0	0	545847	Matched (3)	0	0	6	Yes	Yes	13	Inactive	Catholic
3480	1	Pool de Bas	19	Tshopo	Township	Male	Child of the household head	Congolaise	Catholic	6	Yes	348001	34800104	4	3480	1	4	Province Orientale	Urban	Male	Catholic	Married (monogamous)	Public	60-64	6			2756812	175200	48000	815936	369200	0	0	0	8000	0	0	229360	4402508	Matched (3)	0	0	6	Yes	Yes	10	Public	Catholic
4390	1	Pool de Lubu	999	Haut-Katanga	Township	Female	Spouse of the household head	Congolaise	Catholic	6	No	439001	43900102	2	4390	1	2	Katanga	Urban	Male	Catholic	Married (monogamous)	Retired	55-59	11	100000	99739.6756	2756812	175200	48000	815936	369200	0	0	0	8000	0	0	229360	4402508	Matched (3)	0	0	6	No	No	43	Retired	Catholic
9360	1	Pool de Mwen	999	Lomami	Rural	Female	Child of the household head	Congolaise	Protestant	6	Yes	936001	93600106	6	9360	1	6	Kasaî Oriental	Rural	Male	Protestant	Married (monogamous)	Public	60-64	7			2756812	175200	48000	815936	369200	0	0	0	8000	0	0	229360	4402508	Matched (3)	0	0	6	Yes	Yes	13	Public	Protestant
2230	1	Pool de Lika	999	Haut-Katanga	Urban	Female	Spouse of the household head	Congolaise	Other religion	6	No	223001	22300102	2	2230	1	2	Katanga	Urban	Male	Other religion	Married (monogamous)	Informal non-agricultural	50-54	8	10000		2756812	175200	48000	815936	369200	0	0	0	8000	0	0	229360	4402508	Matched (3)	0	0	6	No	No	45	Informal non-agricultural	Other religion
9280	1	Pool de Mwen	999	Lomami	Rural	Female	Spouse of the household head	Congolaise	Other religion	6	No	928001	92800102	2	9280	1	2	Kasaî Oriental	Rural	Male	Other religion	Married (monogamous)	Informal agricultural	50-54	4	10000		2756812	175200	48000	815936	369200	0	0	0	8000	0	0	229360	4402508	Matched (3)	0	0	6	No	No	20	Informal agricultural	Other religion
9570	1	Pool de Kana	999	Kasai-Centra	Rural	Male	Chef de ménage	Congolaise	Musulmane	6	No	957001	95700101	1	9570	1	1	Kasaî occidental	Rural	Male	Musulmane	Married (monogamous)	Informal agricultural	50-54	6	24000		2756812	175200	48000	815936	369200	0	0	0	8000	0	0	229360	4402508	Matched (3)	0	0	6	No	No	50	Informal agricultural	Musulmane
4490	1	Mbuji-Mayi Cluster	9	Kasai-Orient	Township	Male	Other parent	Congolaise	Protestant	6	No	449001	44900103	3	4490	1	3	Kasaî Oriental	Urban	Female	Other Christian	Widowed	Informal agricultural	90 & +	8			2756812	175200	48000	815936	369200	0	0	0	8000	0	0	229360	4402508	Matched (3)	0	0	6	No	No	22	Informal agricultural	Protestant
5240	1	Pool de INo	8	Mai-Ndombe	Rural	Female	Spouse of the household head	Congolaise	Protestant	6	No	524001	52400102	2	5240	1	2	Bandundu	Rural	Male	None	Married (monogamous)	Informal agricultural	25-29	3	5000		2756812	175200	48000	815936	369200	0	0	0	8000	0	0	229360	4402508	Matched (3)	0	0	6	No	No	23	Informal agricultural	Protestant
8820	1	Pool de Kase	999	Haut-Katanga	Rural	Male	Child of the household head	Congolaise	Protestant	6	Yes	882001	88200104	4	8820	1	4	Katanga	Rural	Male	Protestant	Married (monogamous)	Informal agricultural	35-39	5			540000	0	164000	279120	125382	46000	0	0	39000	33600	0	22400	1249502	Matched (3)	2.689072	2.689072	6	Yes	Yes	12	Informal agricultural	Protestant
2891	1	Pool de Song	8	Kongo Centra	Township	Female	Spouse of the household head	Congolaise	Catholic	6	No	289101	28910102	2	2891	1	2	Bas-Congo	Urban	Male	Catholic	Married (monogamous)	Informal non-agricultural	40-44	8	46151.85883		2756812	175200	48000	815936	369200	0	0	0	8000	0	0	229360	4402508	Matched (3)	0	0	6	No	No	31	Informal non-agricultural	Catholic
4160	1	Pool de Kami	999	Haut-Lomami	Township	Female	Child of the household head	Congolaise	Other Christian	6	Yes	416001	41600105	5	4160	1	5	Katanga	Urban	Male	Other Christian	Married (monogamous)	Inactive	40-44	7			2756812	175200	48000	815936	369200	0	0	0	8000	0	0	229360	4402508	Matched (3)	0	0	6	Yes	Yes	20	Inactive	Other Christian
9530	1	Pool de Kana	999	Kasai-Centra	Rural	Male	Child of the household head	Congolaise	Other Christian	6	Yes	953001	95300105	5	9530	1	5	Kasaî occidental	Rural	Male	Other Christian	Married (polygamous)	Informal agricultural	40-44	8			2756812	175200	48000	815936	369200	0	0	0	8000	0	0	229360	4402508	Matched (3)	0	0	6	Yes	Yes	10	Informal agricultural	Other Christian
1030	1	Pool de Mban	2	Equateur	Urban	Female	Child of the household head	Congolaise	Catholic	6	Yes	103001	10300104	4	1030	1	4	Equateur	Urban	Male	Catholic	Married (monogamous)	Public	45-49	5			2756812	175200	48000	815936	369200	0	0	0	8000	0	0	229360	4402508	Matched (3)	0	0	6	Yes	Yes	22	Public	Catholic
940	1	Pool de Kikw	1	Kwilu	Urban	Female	Spouse of the household head	Congolaise	Catholic	6	No	94001	9400102	2	940	1	2	Bandundu	Urban	Male	Catholic	Married (monogamous)	Chomeurs	25-29	3	35000		2756812	175200	48000	815936	369200	0	0	0	8000	0	0	229360	4402508	Matched (3)	0	0	6	No	No	20	Chomeurs	Catholic
950	1	Pool de Kikw	28	Kwilu	Urban	Female	Spouse of the household head	Congolaise	Other Christian	6	No	95001	9500102	2	950	1	2	Bandundu	Urban	Male	Other Christian	Married (monogamous)	Chomeurs	50-54	5	9000		2756812	175200	48000	815936	369200	0	0	0	8000	0	0	229360	4402508	Matched (3)	0	0	6	No	No	41	Chomeurs	Other Christian
1410	1	Kisangani Cluster	22	Tshopo	Urban	Female	Other parent	Congolaise	Other Christian	6	Yes	141001	14100109	9	1410	1	9	Province Orientale	Urban	Male	Other Christian	Married (monogamous)	Informal non-agricultural	45-49	12			2756812	175200	48000	815936	369200	0	0	0	8000	0	0	229360	4402508	Matched (3)	0	0	6	Yes	Yes	28	Informal non-agricultural	Other Christian
9230	1	Pool de Lusa	999	Sankuru	Rural	Female	Child of the household head	Congolaise	Other Christian	6	Yes	923001	92300104	4	9230	1	4	Kasaî Oriental	Rural	Male	Other Christian	Married (monogamous)	Informal agricultural	50-54	9			2756812	175200	48000	815936	369200	0	0	0	8000	0	0	229360	4402508	Matched (3)	0	0	6	Yes	Yes	26	Informal agricultural	Other Christian
4792	1	Pool de Mwek	24	Kasai	Township	Female	Spouse of the household head	Congolaise	Other Christian	6	No	479201	47920102	2	4792	1	2	Kasaî occidental	Urban	Male	Other Christian	Married (monogamous)	Informal non-agricultural	40-44	10			2756812	175200	48000	815936	369200	0	0	0	8000	0	0	229360	4402508	Matched (3)	0	0	6	No	No	24	Informal non-agricultural	Other Christian
7720	1	Pool de Buka	999	Sud-Kivu	Rural	Female	Child of the household head	Congolaise	Protestant	6	Yes	772001	77200105	5	7720	1	5	Sud-Kivu	Rural	Male	Catholic	Married (monogamous)	Public	55-59	6			2756812	175200	48000	815936	369200	0	0	0	8000	0	0	229360	4402508	Matched (3)	0	0	6	Yes	Yes	15	Public	Protestant
2700	1	Pool de Kana	999	Kasai-Centra	Urban	Female	Child of the household head	Congolaise	Protestant	6	Yes	270001	27000103	3	2700	1	3	Kasaî occidental	Urban	Male	Protestant	Married (monogamous)	Chomeurs	35-39	7			2756812	175200	48000	815936	369200	0	0	0	8000	0	0	229360	4402508	Matched (3)	0	0	6	Yes	Yes	11	Chomeurs	Protestant
4240	1	Pool de Kale	999	Tanganyka	Township	Female	Spouse of the household head	Congolaise	Protestant	6	No	424001	42400102	2	4240	1	2	Katanga	Urban	Male	Protestant	Married (monogamous)	Chomeurs	30-34	5	46898.95412		2756812	175200	48000	815936	369200	0	0	0	8000	0	0	229360	4402508	Matched (3)	0	0	6	No	No	24	Chomeurs	Protestant
700	1	Pool de Mata	9	Kongo Centra	Urban	Male	Child of the household head	Congolaise	Catholic	6	No	70001	7000103	3	700	1	3	Bas-Congo	Urban	Male	Catholic	Married (monogamous)	Formal private sector	50-54	8			355020	43920	0	0	4880	0	0	0	0	0	12200	10980	427000	Matched (3)	0	0	6	No	No	27	Formal private sector	Catholic
700	1	Pool de Mata	9	Kongo Centra	Urban	Male	Child of the household head	Congolaise	Catholic	6	Yes	70001	7000105	5	700	1	5	Bas-Congo	Urban	Male	Catholic	Married (monogamous)	Formal private sector	50-54	8			2756812	175200	48000	815936	369200	0	0	0	8000	0	0	229360	4402508	Matched (3)	0	0	6	Yes	Yes	19	Formal private sector	Catholic
120	1	Kinshasa Cluster	14	Kinshasa	Urban	Male	Other parent	Congolaise	Other Christian	6	Yes	12001	1200107	7	120	1	7	Kinshasa	Urban	Female	Animist	Widowed	Informal non-agricultural	50-54	9			2756812	175200	48000	815936	369200	0	0	0	8000	0	0	229360	4402508	Matched (3)	0	0	6	Yes	Yes	8	Informal non-agricultural	Other Christian
3880	1	Pool de Uvir	20	Sud-Kivu	Township	Female	Child of the household head	Congolaise	Other Christian	6	No	388001	38800105	5	3880	1	5	Sud-Kivu	Urban	Male	Other Christian	Married (monogamous)	Formal private sector	30-34	6			2756812	175200	48000	815936	369200	0	0	0	8000	0	0	229360	4402508	Matched (3)	0	0	6	No	No	6	Formal private sector	Other Christian
4160	1	Pool de Kami	999	Haut-Lomami	Township	Female	Child of the household head	Congolaise	Other Christian	6	Yes	416001	41600107	7	4160	1	7	Katanga	Urban	Male	Other Christian	Married (monogamous)	Inactive	40-44	7			2756812	175200	48000	815936	369200	0	0	0	8000	0	0	229360	4402508	Matched (3)	0	0	6	Yes	Yes	12	Inactive	Other Christian
7080	1	Isiro Cluster	1	Haut-Uele	Rural	Male	Chef de ménage	Congolaise	Catholic	6	No	708001	70800101	1	7080	1	1	Province Orientale	Rural	Male	Catholic	Married (monogamous)	Inactive	50-54	3			2756812	175200	48000	815936	369200	0	0	0	8000	0	0	229360	4402508	Matched (3)	0	0	6	No	No	54	Inactive	Catholic
8300	1	Pool de Kami	999	Haut-Lomami	Rural	Male	Chef de ménage	Congolaise	Other religion	6	No	830001	83000101	1	8300	1	1	Katanga	Rural	Male	Other religion	Married (monogamous)	Chomeurs	35-39	7			2756812	175200	48000	815936	369200	0	0	0	8000	0	0	229360	4402508	Matched (3)	0	0	6	No	No	38	Chomeurs	Other religion
8290	1	Pool de Kami	999	Haut-Lomami	Rural	Male	Chef de ménage	Congolaise	Catholic	6	No	829001	82900101	1	8290	1	1	Katanga	Rural	Male	Catholic	Married (monogamous)	Informal agricultural	35-39	4	46883.20671		2756812	175200	48000	815936	369200	0	0	0	8000	0	0	229360	4402508	Matched (3)	0	0	6	No	No	38	Informal agricultural	Catholic
270	1	Kinshasa Cluster	5	Kinshasa	Urban	Male	Other parent	Congolaise	Catholic	6	Yes	27001	2700102	2	270	1	2	Kinshasa	Urban	Male	Catholic	Single	Formal private sector	30-34	2			2756812	175200	48000	815936	369200	0	0	0	8000	0	0	229360	4402508	Matched (3)	0	0	6	Yes	Yes	27	Formal private sector	Catholic
5660	1	Pool de Temb	7	Kwango	Rural	Male	Child of the household head	Congolaise	Catholic	6	Yes	566001	56600104	4	5660	1	4	Bandundu	Rural	Female	Catholic	Widowed	Informal agricultural	45-49	8			2756812	175200	48000	815936	369200	0	0	0	8000	0	0	229360	4402508	Matched (3)	0	0	6	Yes	Yes	18	Informal agricultural	Catholic
4580	1	Pool de Lusa	999	Sankuru	Township	Male	Chef de ménage	Congolaise	Other Christian	6	No	458001	45800101	1	4580	1	1	Kasaî Oriental	Urban	Male	Other Christian	Married (polygamous)	Inactive	40-44	3			2756812	175200	48000	815936	369200	0	0	0	8000	0	0	229360	4402508	Matched (3)	0	0	6	No	No	40	Inactive	Other Christian
3580	1	Pool de Bun	8	Ituri	Township	Female	Other parent	Congolaise	Protestant	6	No	358001	35800103	3	3580	1	3	Province Orientale	Urban	Male	Protestant	Married (monogamous)	Informal non-agricultural	40-44	12	10000		2756812	175200	48000	815936	369200	0	0	0	8000	0	0	229360	4402508	Matched (3)	0	0	6	No	No	59	Informal non-agricultural	Protestant
1380	1	Kisangani Cluster	2	Tshopo	Urban	Male	Child of the household head	Congolaise	Protestant	6	Yes	138001	13800104	4	1380	1	4	Province Orientale	Urban	Male	Protestant	Married (monogamous)	Informal agricultural	30-34	11			2756812	175200	48000	815936	369200	0	0	0	8000	0	0	229360	4402508	Matched (3)	0	0	6	Yes	Yes	7	Informal agricultural	Protestant
4640	1	Pool de Kabi	999	Lomami	Township	Male	Other parent	Congolaise	Catholic	6	Yes	464001	46400108	8	4640	1	8	Kasaî occidental	Urban	Male	Catholic	Married (monogamous)	Informal agricultural	65-69	8			2756812	175200	48000	815936	369200	0	0	0	8000	0	0	229360	4402508	Matched (3)	0	0	6	Yes	Yes	17	Informal agricultural	Catholic
3182	1	Pool de Mban	19	Equateur	Township	Female	Spouse of the household head	Congolaise	Catholic	6	No	318201	31820102	2	3182	1	2	Equateur	Urban	Male	Catholic	Married (monogamous)	Informal agricultural	30-34	4	10000	5000	2756812	175200	48000	815936	369200	0	0	0	8000	0	0	229360	4402508	Matched (3)	0	0	6	No	No	22	Informal agricultural	Catholic
7400	1	Pool de Buta	1	Bas-Uele	Rural	Female	Child of the household head	Congolaise	Protestant	6	Yes	740001	74000103	3	7400	1	3	Province Orientale	Rural	Male	Protestant	Married (monogamous)	Informal agricultural	65-69	4			2756812	175200	48000	815936	369200	0	0	0	8000	0	0	229360	4402508	Matched (3)	0	0	6	Yes	Yes	20	Informal agricultural	Protestant
7650	1	Pool de Beni	4	Nord-Kivu	Rural	Male	Child of the household head	Congolaise	Protestant	6	Yes	765001	76500103	3	7650	1	3	Nord-Kivu	Rural	Male	Other Christian	Married (monogamous)	Informal agricultural	35-39	6			2756812	175200	48000	815936	369200	0	0	0	8000	0	0	229360	4402508	Matched (3)	0	0	6	Yes	Yes	9	Informal agricultural	Protestant
3130	1	Pool de Keng	3	Kwango	Township	Female	Child of the household head	Congolaise	Catholic	6	Yes	313001	31300107	7	3130	1	7	Bandundu	Urban	Male	Catholic	Married (monogamous)	Informal non-agricultural	55-59	12	3000		2756812	175200	48000	815936	369200	0	0	0	8000	0	0	229360	4402508	Matched (3)	0	0	6	Yes	Yes	15	Informal non-agricultural	Catholic
630	1	Pool de Boma	64	Kongo Centra	Urban	Male	Other parent	Congolaise	Other Christian	6	Yes	63001	6300108	8	630	1	8	Bas-Congo	Urban	Male	Other Christian	Cohabiting	Formal private sector	30-34	8			2756812	175200	48000	815936	369200	0	0	0	8000	0	0	229360	4402508	Matched (3)	0	0	6	Yes	Yes	13	Formal private sector	Other Christian
7990	1	Pool de Kibo	1	Maniema	Rural	Male	Other parent	Congolaise	Protestant	6	Yes	799001	79900108	8	7990	1	8	Maniema	Rural	Male	Protestant	Married (monogamous)	Public	30-34	8			2756812	175200	48000	815936	369200	0	0	0	8000	0	0	229360	4402508	Matched (3)	0	0	6	Yes	Yes	10	Public	Protestant
6590	1	Pool de Boku	3	Tshuapa	Rural	Male	Child of the household head	Congolaise	Protestant	6	No	659001	65900103	3	6590	1	3	Equateur	Rural	Male	Catholic	Married (monogamous)	Informal agricultural	50-54	11			2756812	175200	48000	815936	369200	0	0	0	8000	0	0	229360	4402508	Matched (3)	0	0	6	No	No	26	Informal agricultural	Protestant
4860	1	Pool de Mwek	48	Kasai	Township	Male	Child of the household head	Congolaise	Other Christian	6	Yes	486001	48600103	3	4860	1	3	Kasaî occidental	Urban	Male	Other Christian	Married (monogamous)	Inactive	25-29	5			2756812	175200	48000	815936	369200	0	0	0	8000	0	0	229360	4402508	Matched (3)	0	0	6	Yes	Yes	7	Inactive	Other Christian
400	1	Kinshasa Cluster	40	Kinshasa	Urban	Male	Chef de ménage	Congolaise	Other Christian	6	No	40001	4000101	1	400	1	1	Kinshasa	Urban	Male	Other Christian	Married (monogamous)	Informal non-agricultural	40-44	6			2756812	175200	48000	815936	369200	0	0	0	8000	0	0	229360	4402508	Matched (3)	0	0	6	No	No	41	Informal non-agricultural	Other Christian
4760	1	Pool de Kana	999	Kasai-Centra	Township	Female	Child of the household head	Congolaise	Other Christian	6	No	476001	47600103	3	4760	1	3	Kasaî occidental	Urban	Male	Other Christian	Married (monogamous)	Public	60-64	15	2500		2756812	175200	48000	815936	369200	0	0	0	8000	0	0	229360	4402508	Matched (3)	0	0	6	No	No	29	Public	Other Christian
8270	1	Pool de Kami	999	Haut-Lomami	Rural	Male	Chef de ménage	Congolaise	Animist	6	No	827001	82700101	1	8270	1	1	Katanga	Rural	Male	Animist	Married (monogamous)	Informal agricultural	55-59	3	15026.04045	51120.03134	2756812	175200	48000	815936	369200	0	0	0	8000	0	0	229360	4402508	Matched (3)	0	0	6	No	No	58	Informal agricultural	Animist
9850	1	Pool de Mwek	20	Kasai	Rural	Male	Child of the household head	Congolaise	Other Christian	6	Yes	985001	98500104	4	9850	1	4	Kasaî occidental	Rural	Male	Other Christian	Married (monogamous)	Informal agricultural	35-39	9			2756812	175200	48000	815936	369200	0	0	0	8000	0	0	229360	4402508	Matched (3)	0	0	6	Yes	Yes	12	Informal agricultural	Other Christian
4340	1	Pool de Kase	999	Haut-Katanga	Township	Male	Chef de ménage	Congolaise	None	6	No	434001	43400101	1	4340	1	1	Katanga	Urban	Male	None	Married (monogamous)	Informal agricultural	45-49	4	30000	10000	2756812	175200	48000	815936	369200	0	0	0	8000	0	0	229360	4402508	Matched (3)	0	0	6	No	No	48	Informal agricultural	None
8180	1	Pool de Kolw	999	Lualaba	Rural	Female	Chef de ménage	Congolaise	Catholic	6	No	818001	81800101	1	8180	1	1	Katanga	Rural	Female	Catholic	Married (polygamous)	Informal agricultural	40-44	6	35000		2756812	175200	48000	815936	369200	0	0	0	8000	0	0	229360	4402508	Matched (3)	0	0	6	No	No	43	Informal agricultural	Catholic
4430	1	Mbuji-Mayi Cluster	999	Kasai-Orient	Township	Female	Other parent	Congolaise	Other Christian	6	Yes	443001	44300103	3	4430	1	3	Kasaî Oriental	Urban	Male	Other Christian	Married (monogamous)	Informal non-agricultural	20-24	3			2756812	175200	48000	815936	369200	0	0	0	8000	0	0	229360	4402508	Matched (3)	0	0	6	Yes	Yes	12	Informal non-agricultural	Other Christian
1410	1	Kisangani Cluster	22	Tshopo	Urban	Male	Child of the household head	Congolaise	Other Christian	6	Yes	141001	14100107	7	1410	1	7	Province Orientale	Urban	Male	Other Christian	Married (monogamous)	Informal non-agricultural	45-49	12			1373720	0	0	282125	29280	4880	0	0	0	0	0	0	1690005	Matched (3)	0	0	6	Yes	Yes	10	Informal non-agricultural	Other Christian
3130	1	Pool de Keng	3	Kwango	Township	Male	Child of the household head	Congolaise	Catholic	6	Yes	313001	31300109	9	3130	1	9	Bandundu	Urban	Male	Catholic	Married (monogamous)	Informal non-agricultural	55-59	12			2756812	175200	48000	815936	369200	0	0	0	8000	0	0	229360	4402508	Matched (3)	0	0	6	Yes	Yes	13	Informal non-agricultural	Catholic
9850	1	Pool de Mwek	20	Kasai	Rural	Female	Spouse of the household head	Congolaise	Other Christian	6	No	985001	98500102	2	9850	1	2	Kasaî occidental	Rural	Male	Other Christian	Married (monogamous)	Informal agricultural	35-39	9	15000		2756812	175200	48000	815936	369200	0	0	0	8000	0	0	229360	4402508	Matched (3)	0	0	6	No	No	27	Informal agricultural	Other Christian
3160	1	Pool de Keng	4	Kwango	Township	Male	Child of the household head	Congolaise	Other Christian	6	Yes	316001	31600104	4	3160	1	4	Bandundu	Urban	Female	Other Christian	Married (polygamous)	Informal agricultural	40-44	8			2756812	175200	48000	815936	369200	0	0	0	8000	0	0	229360	4402508	Matched (3)	0	0	6	Yes	Yes	19	Informal agricultural	Other Christian
1440	1	Kisangani Cluster	28	Tshopo	Urban	Male	Chef de ménage	Congolaise	Protestant	6	No	144001	14400101	1	1440	1	1	Province Orientale	Urban	Male	Protestant	Married (monogamous)	Public	55-59	4	344696.5016		2756812	175200	48000	815936	369200	0	0	0	8000	0	0	229360	4402508	Matched (3)	0	0	6	No	No	57	Public	Protestant
4280	1	Pool de Mano	999	Tanganyka	Township	Male	Child of the household head	Congolaise	Protestant	6	Yes	428001	42800106	6	4280	1	6	Katanga	Urban	Female	Protestant	Widowed	Informal agricultural	45-49	8			2756812	175200	48000	815936	369200	0	0	0	8000	0	0	229360	4402508	Matched (3)	0	0	6	Yes	Yes	7	Informal agricultural	Protestant
4280	1	Pool de Mano	999	Tanganyka	Township	Male	Child of the household head	Congolaise	Protestant	6	Yes	428001	42800103	3	4280	1	3	Katanga	Urban	Female	Protestant	Widowed	Informal agricultural	45-49	8	30000		2756812	175200	48000	815936	369200	0	0	0	8000	0	0	229360	4402508	Matched (3)	0	0	6	Yes	Yes	19	Informal agricultural	Protestant
410	1	Kinshasa Cluster	25	Kinshasa	Urban	Female	Spouse of the household head	Congolaise	Catholic	6	No	41001	4100102	2	410	1	2	Kinshasa	Urban	Male	Catholic	Married (monogamous)	Public	40-44	4			2756812	175200	48000	815936	369200	0	0	0	8000	0	0	229360	4402508	Matched (3)	0	0	6	No	No	34	Public	Catholic
3160	1	Pool de Keng	4	Kwango	Township	Male	Child of the household head	Congolaise	Other Christian	6	Yes	316001	31600103	3	3160	1	3	Bandundu	Urban	Female	Other Christian	Married (polygamous)	Informal agricultural	40-44	8			2756812	175200	48000	815936	369200	0	0	0	8000	0	0	229360	4402508	Matched (3)	0	0	6	Yes	Yes	22	Informal agricultural	Other Christian
8360	1	Pool de Kami	999	Haut-Lomami	Rural	Female	Child of the household head	Congolaise	Other religion	6	Yes	836001	83600104	4	8360	1	4	Katanga	Rural	Male	Other religion	Married (monogamous)	Informal agricultural	45-49	7			2756812	175200	48000	815936	369200	0	0	0	8000	0	0	229360	4402508	Matched (3)	0	0	6	Yes	Yes	11	Informal agricultural	Other religion
2670	1	Pool de Kana	999	Kasai-Centra	Urban	Female	Child of the household head	Congolaise	Other religion	6	Yes	267001	26700103	3	2670	1	3	Kasaî occidental	Urban	Male	Other religion	Married (monogamous)	Inactive	40-44	7			865048	150060	64080	33242	78600	11440	11000	0	25000	0	3600	67700	1309770	Matched (3)	0	0	6	Yes	Yes	16	Inactive	Other religion
8180	1	Pool de Kolw	999	Lualaba	Rural	Male	Spouse of the household head	Congolaise	Catholic	6	No	818001	81800102	2	8180	1	2	Katanga	Rural	Female	Catholic	Married (polygamous)	Informal agricultural	40-44	6	270000		2756812	175200	48000	815936	369200	0	0	0	8000	0	0	229360	4402508	Matched (3)	0	0	6	No	No	43	Informal agricultural	Catholic
3160	1	Pool de Keng	4	Kwango	Township	Male	Child of the household head	Congolaise	Other Christian	6	No	316001	31600102	2	3160	1	2	Bandundu	Urban	Female	Other Christian	Married (polygamous)	Informal agricultural	40-44	8	13583.40508		2756812	175200	48000	815936	369200	0	0	0	8000	0	0	229360	4402508	Matched (3)	0	0	6	No	No	24	Informal agricultural	Other Christian
9160	1	Pool de Lodj	2	Sankuru	Rural	Female	Child of the household head	Congolaise	Catholic	6	Yes	916001	91600103	3	9160	1	3	Kasaî Oriental	Rural	Female	Catholic	Married (polygamous)	Informal agricultural	45-49	4			2756812	175200	48000	815936	369200	0	0	0	8000	0	0	229360	4402508	Matched (3)	0	0	6	Yes	Yes	20	Informal agricultural	Catholic
2990	1	Pool de Band	9	Kwilu	Township	Male	Child of the household head	Congolaise	Other religion	6	Yes	299001	29900105	5	2990	1	5	Bandundu	Urban	Male	Other religion	Married (monogamous)	Public	45-49	6			2756812	175200	48000	815936	369200	0	0	0	8000	0	0	229360	4402508	Matched (3)	0	0	6	Yes	Yes	13	Public	Other religion
20	1	Kinshasa Cluster	6	Kinshasa	Urban	Male	Chef de ménage	Congolaise	Catholic	6	No	2001	200101	1	20	1	1	Kinshasa	Urban	Male	Catholic	Married (monogamous)	Public	60-64	8	89000		2756812	175200	48000	815936	369200	0	0	0	8000	0	0	229360	4402508	Matched (3)	0	0	6	No	No	63	Public	Catholic
6540	1	Pool de Boku	1	Tshuapa	Rural	Male	Chef de ménage	Congolaise	Other religion	6	No	654001	65400101	1	6540	1	1	Equateur	Rural	Male	Other religion	Married (monogamous)	Informal agricultural	45-49	7	32000	15000	2756812	175200	48000	815936	369200	0	0	0	8000	0	0	229360	4402508	Matched (3)	0	0	6	No	No	46	Informal agricultural	Other religion
3960	1	Pool de Uvir	132	Sud-Kivu	Township	Female	Chef de ménage	Congolaise	Catholic	6	No	396001	39600101	1	3960	1	1	Sud-Kivu	Urban	Female	Catholic	Married (monogamous)	Informal non-agricultural	55-59	11	75000	60000	2756812	175200	48000	815936	369200	0	0	0	8000	0	0	229360	4402508	Matched (3)	0	0	6	No	No	57	Informal non-agricultural	Catholic
370	1	Kinshasa Cluster	3	Kinshasa	Urban	Female	Child of the household head	Congolaise	Other Christian	6	Yes	37001	3700106	6	370	1	6	Kinshasa	Urban	Male	Catholic	Married (monogamous)	Informal non-agricultural	55-59	6			2244556	0	0	977108	44400	0	209840	0	0	0	0	0	3475904	Matched (3)	0	0	6	Yes	Yes	15	Informal non-agricultural	Other Christian
4570	1	Pool de Lusa	999	Sankuru	Township	Male	Chef de ménage	Congolaise	Catholic	6	No	457001	45700101	1	4570	1	1	Kasaî Oriental	Urban	Male	Catholic	Married (polygamous)	Public	40-44	8	45225.22671		2756812	175200	48000	815936	369200	0	0	0	8000	0	0	229360	4402508	Matched (3)	0	0	6	No	No	42	Public	Catholic
5800	1	Pool de Basa	2	Equateur	Rural	Male	Chef de ménage	Congolaise	Catholic	6	No	580001	58000101	1	5800	1	1	Equateur	Rural	Male	Catholic	Married (monogamous)	Public	45-49	10	10000	40000	985760	0	16000	279172	40800	0	20000	18000	75000	60000	0	0	1494732	Matched (3)	4.014097	4.014097	6	No	No	46	Public	Catholic
6580	1	Pool de Boen	1	Tshuapa	Rural	Female	Child of the household head	Congolaise	Catholic	6	Yes	658001	65800103	3	6580	1	3	Equateur	Rural	Male	Other Christian	Married (monogamous)	Public	30-34	7			2756812	175200	48000	815936	369200	0	0	0	8000	0	0	229360	4402508	Matched (3)	0	0	6	Yes	Yes	17	Public	Catholic
9420	1	Pool de Kabi	999	Lomami	Rural	Female	Child of the household head	Congolaise	Other Christian	6	Yes	942001	94200104	4	9420	1	4	Kasaî occidental	Rural	Female	Other Christian	Married (polygamous)	Informal agricultural	40-44	7			2756812	175200	48000	815936	369200	0	0	0	8000	0	0	229360	4402508	Matched (3)	0	0	6	Yes	Yes	7	Informal agricultural	Other Christian
480	1	Kinshasa Cluster	55	Kinshasa	Urban	Female	Child of the household head	Congolaise	Catholic	6	Yes	48001	4800107	7	480	1	7	Kinshasa	Urban	Male	Catholic	Married (monogamous)	Public	65-69	7			1970380	0	182500	635705	28000	0	970000	0	54000	56000	0	24000	3920585	Matched (3)	1.428358	1.428358	6	Yes	Yes	8	Public	Catholic
8260	1	Pool de Kasa	999	Lualaba	Rural	Male	Child of the household head	Congolaise	Catholic	6	No	826001	82600104	4	8260	1	4	Katanga	Rural	Male	Catholic	Married (monogamous)	Informal agricultural	50-54	11	13204.24873		2756812	175200	48000	815936	369200	0	0	0	8000	0	0	229360	4402508	Matched (3)	0	0	6	No	No	21	Informal agricultural	Catholic
9020	1	Mbuji-Mayi Cluster	999	Kasai-Orient	Rural	Male	Child of the household head	Congolaise	Protestant	6	No	902001	90200107	7	9020	1	7	Kasaî Oriental	Rural	Male	Protestant	Married (polygamous)	Informal agricultural	55-59	7			2756812	175200	48000	815936	369200	0	0	0	8000	0	0	229360	4402508	Matched (3)	0	0	6	No	No	27	Informal agricultural	Protestant
8990	1	Mbuji-Mayi Cluster	2	Kasai-Orient	Rural	Male	Child of the household head	Congolaise	Other Christian	6	Yes	899001	89900105	5	8990	1	5	Kasaî Oriental	Rural	Male	Other Christian	Married (monogamous)	Informal agricultural	65-69	7			691212	0	52800	148000	40000	42000	260000	0	159000	0	0	100000	1493012	Matched (3)	0	0	6	Yes	Yes	16	Informal agricultural	Other Christian
3440	1	Pool de Bas	2	Tshopo	Township	Male	Chef de ménage	Congolaise	Protestant	6	No	344001	34400101	1	3440	1	1	Province Orientale	Urban	Male	Protestant	Married (monogamous)	Public	55-59	5	0		308420	4880	17000	6470	42360	7300	0	0	0	0	0	0	386430	Matched (3)	0	0	6	No	No	59	Public	Protestant
9030	1	Mbuji-Mayi Cluster	999	Kasai-Orient	Rural	Male	Child of the household head	Congolaise	Catholic	6	Yes	903001	90300104	4	9030	1	4	Kasaî Oriental	Rural	Female	Catholic	Married (polygamous)	Informal non-agricultural	40-44	7			2756812	175200	48000	815936	369200	0	0	0	8000	0	0	229360	4402508	Matched (3)	0	0	6	Yes	Yes	8	Informal non-agricultural	Catholic
8140	1	Pool de Kasa	999	Lualaba	Rural	Female	Child of the household head	Congolaise	Other Christian	6	No	814001	81400103	3	8140	1	3	Katanga	Rural	Male	Other Christian	Married (monogamous)	Public	45-49	6			2756812	175200	48000	815936	369200	0	0	0	8000	0	0	229360	4402508	Matched (3)	0	0	6	No	No	22	Public	Other Christian
420	1	Kinshasa Cluster	19	Kinshasa	Urban	Male	Child of the household head	Congolaise	Catholic	6	Yes	42001	4200105	5	420	1	5	Kinshasa	Urban	Male	Catholic	Married (monogamous)	Public	50-54	9			2756812	175200	48000	815936	369200	0	0	0	8000	0	0	229360	4402508	Matched (3)	0	0	6	Yes	Yes	15	Public	Catholic
5690	1	Pool de Mban	2	Equateur	Rural	Male	Child of the household head	Congolaise	Protestant	6	Yes	569001	56900104	4	5690	1	4	Equateur	Rural	Male	Protestant	Married (polygamous)	Informal agricultural	25-29	13			2756812	175200	48000	815936	369200	0	0	0	8000	0	0	229360	4402508	Matched (3)	0	0	6	Yes	Yes	6	Informal agricultural	Protestant
8790	1	Pool de Kase	999	Haut-Katanga	Rural	Male	Other person	Congolaise	Protestant	6	No	879001	87900106	6	8790	1	6	Katanga	Rural	Male	Protestant	Married (polygamous)	Informal agricultural	35-39	5	30		2756812	175200	48000	815936	369200	0	0	0	8000	0	0	229360	4402508	Matched (3)	0	0	6	No	No	45	Informal agricultural	Protestant
2140	1	Pool de Lika	1	Haut-Katanga	Urban	Male	Chef de ménage	Congolaise	Other religion	6	No	214001	21400101	1	2140	1	1	Katanga	Urban	Male	Other religion	Widowed	Retired	70-74	7			2756812	175200	48000	815936	369200	0	0	0	8000	0	0	229360	4402508	Matched (3)	0	0	6	No	No	73	Retired	Other religion
6230	1	Pool de Gbad	5	Nord-Ubangi	Rural	Female	Spouse of the household head	Congolaise	Protestant	6	No	623001	62300102	2	6230	1	2	Equateur	Rural	Male	Protestant	Married (monogamous)	Informal agricultural	25-29	6	30000		743798	0	20000	267480	28280	10000	10000	13600	1200	175000	98000	27500	1394858	Matched (3)	12.54608	12.54608	6	No	No	22	Informal agricultural	Protestant
6100	1	Pool de Gbad	7	Nord-Ubangi	Rural	Male	Chef de ménage	Congolaise	Catholic	6	No	610001	61000101	1	6100	1	1	Equateur	Rural	Male	Catholic	Married (monogamous)	Informal agricultural	50-54	5	37000		2756812	175200	48000	815936	369200	0	0	0	8000	0	0	229360	4402508	Matched (3)	0	0	6	No	No	51	Informal agricultural	Catholic
9230	1	Pool de Lusa	999	Sankuru	Rural	Male	Child of the household head	Congolaise	Other Christian	6	Yes	923001	92300105	5	9230	1	5	Kasaî Oriental	Rural	Male	Other Christian	Married (monogamous)	Informal agricultural	50-54	9			2756812	175200	48000	815936	369200	0	0	0	8000	0	0	229360	4402508	Matched (3)	0	0	6	Yes	Yes	22	Informal agricultural	Other Christian
4220	1	Pool de Kale	999	Tanganyka	Township	Male	Chef de ménage	Congolaise	Protestant	6	No	422001	42200101	1	4220	1	1	Katanga	Urban	Male	Protestant	Married (polygamous)	Chomeurs	.a	8			1357786	0	34000	33152	10000	95200	0	0	0	33000	0	104000	1667138	Matched (3)	1.979441	1.979441	6	No	No	NSP	Chomeurs	Protestant
4732	1	Pool de Kana	999	Kasai-Centra	Township	Male	Child of the household head	Congolaise	Kimbanguist	6	No	473201	47320102	2	4732	1	2	Kasaî occidental	Urban	Female	Kimbanguist	Widowed	Informal non-agricultural	35-39	3	3000		2756812	175200	48000	815936	369200	0	0	0	8000	0	0	229360	4402508	Matched (3)	0	0	6	No	No	20	Informal non-agricultural	Kimbanguist
1380	1	Kisangani Cluster	2	Tshopo	Urban	Male	Chef de ménage	Congolaise	Protestant	6	No	138001	13800101	1	1380	1	1	Province Orientale	Urban	Male	Protestant	Married (monogamous)	Informal agricultural	30-34	11	299524.1551		2756812	175200	48000	815936	369200	0	0	0	8000	0	0	229360	4402508	Matched (3)	0	0	6	No	No	31	Informal agricultural	Protestant
3422	1	Pool de Boku	8	Tshuapa	Township	Male	Child of the household head	Congolaise	Other religion	6	Yes	342201	34220104	4	3422	1	4	Equateur	Urban	Male	Other religion	Married (monogamous)	Inactive	35-39	3			2756812	175200	48000	815936	369200	0	0	0	8000	0	0	229360	4402508	Matched (3)	0	0	6	Yes	Yes	9	Inactive	Other religion
3530	1	Pool de Bun	5	Ituri	Township	Female	Child of the household head	Congolaise	Catholic	6	Yes	353001	35300108	8	3530	1	8	Province Orientale	Urban	Male	Catholic	Married (monogamous)	Formal private sector	65-69	10			1151680	0	0	63316	0	0	0	0	0	0	0	0	1214996	Matched (3)	0	0	6	Yes	Yes	7	Formal private sector	Catholic
2220	1	Pool de Lika	999	Haut-Katanga	Urban	Female	Child of the household head	Congolaise	Other Christian	6	Yes	222001	22200103	3	2220	1	3	Katanga	Urban	Male	Other Christian	Married (monogamous)	Public	45-49	9			2756812	175200	48000	815936	369200	0	0	0	8000	0	0	229360	4402508	Matched (3)	0	0	6	Yes	Yes	22	Public	Other Christian
530	1	Kinshasa Cluster	55	Kinshasa	Urban	Female	Other parent	Congolaise	None	6	No	53001	5300109	9	530	1	9	Kinshasa	Urban	Female	Protestant	Widowed	Inactive	60-64	12			2756812	175200	48000	815936	369200	0	0	0	8000	0	0	229360	4402508	Matched (3)	0	0	6	No	No	10	Inactive	None
2000	1	Pool de Kind	59	Maniema	Urban	Female	Child of the household head	Congolaise	Protestant	6	Yes	200001	20000102	2	2000	1	2	Maniema	Urban	Female	Protestant	Widowed	Informal non-agricultural	45-49	3			2756812	175200	48000	815936	369200	0	0	0	8000	0	0	229360	4402508	Matched (3)	0	0	6	Yes	Yes	26	Informal non-agricultural	Protestant
1140	1	Pool de Mban	2	Equateur	Urban	Male	Other person	Congolaise	Other Christian	6	No	114001	11400104	4	1140	1	4	Equateur	Urban	Male	Other Christian	Single	Inactive	30-34	4	50000		2756812	175200	48000	815936	369200	0	0	0	8000	0	0	229360	4402508	Matched (3)	0	0	6	No	No	23	Inactive	Other Christian
4760	1	Pool de Kana	999	Kasai-Centra	Township	Female	Child of the household head	Congolaise	Other Christian	6	No	476001	47600106	6	4760	1	6	Kasaî occidental	Urban	Male	Other Christian	Married (monogamous)	Public	60-64	15	4000		2756812	175200	48000	815936	369200	0	0	0	8000	0	0	229360	4402508	Matched (3)	0	0	6	No	No	26	Public	Other Christian
6260	1	Pool de Gbad	15	Nord-Ubangi	Rural	Female	Child of the household head	Congolaise	Other Christian	6	Yes	626001	62600106	6	6260	1	6	Equateur	Rural	Male	Other Christian	Married (monogamous)	Informal non-agricultural	40-44	7			2756812	175200	48000	815936	369200	0	0	0	8000	0	0	229360	4402508	Matched (3)	0	0	6	Yes	Yes	9	Informal non-agricultural	Other Christian
1900	1	Pool de Buka	77	Sud-Kivu	Urban	Female	Child of the household head	Congolaise	Protestant	6	Yes	190001	19000103	3	1900	1	3	Sud-Kivu	Urban	Male	Protestant	Married (monogamous)	Informal non-agricultural	55-59	10			2756812	175200	48000	815936	369200	0	0	0	8000	0	0	229360	4402508	Matched (3)	0	0	6	Yes	Yes	17	Informal non-agricultural	Protestant
3170	1	Pool de Keng	18	Kwango	Township	Male	Other parent	Congolaise	Catholic	6	No	317001	31700109	9	3170	1	9	Bandundu	Urban	Male	Catholic	Married (monogamous)	Public	55-59	9			2756812	175200	48000	815936	369200	0	0	0	8000	0	0	229360	4402508	Matched (3)	0	0	6	No	No	6	Public	Catholic
4732	1	Pool de Kana	999	Kasai-Centra	Township	Male	Child of the household head	Congolaise	Kimbanguist	6	No	473201	47320103	3	4732	1	3	Kasaî occidental	Urban	Female	Kimbanguist	Widowed	Informal non-agricultural	35-39	3	25000		2756812	175200	48000	815936	369200	0	0	0	8000	0	0	229360	4402508	Matched (3)	0	0	6	No	No	18	Informal non-agricultural	Kimbanguist
2220	1	Pool de Lika	999	Haut-Katanga	Urban	Female	Spouse of the household head	Congolaise	Other Christian	6	No	222001	22200102	2	2220	1	2	Katanga	Urban	Male	Other Christian	Married (monogamous)	Public	45-49	9	60000		2756812	175200	48000	815936	369200	0	0	0	8000	0	0	229360	4402508	Matched (3)	0	0	6	No	No	44	Public	Other Christian
5540	1	Pool de Fesh	5	Kwango	Rural	Female	Child of the household head	Congolaise	Catholic	6	Yes	554001	55400104	4	5540	1	4	Bandundu	Rural	Male	Catholic	Married (monogamous)	Informal non-agricultural	40-44	7			2756812	175200	48000	815936	369200	0	0	0	8000	0	0	229360	4402508	Matched (3)	0	0	6	Yes	Yes	7	Informal non-agricultural	Catholic
8780	1	Pool de Lubu	999	Haut-Katanga	Rural	Female	Spouse of the household head	Congolaise	Kimbanguist	6	No	878001	87800102	2	8780	1	2	Katanga	Rural	Male	Kimbanguist	Married (monogamous)	Informal agricultural	50-54	5	0		2756812	175200	48000	815936	369200	0	0	0	8000	0	0	229360	4402508	Matched (3)	0	0	6	No	No	44	Informal agricultural	Kimbanguist
8370	1	Pool de Kami	3	Haut-Lomami	Rural	Male	Chef de ménage	Congolaise	Other Christian	6	No	837001	83700101	1	8370	1	1	Katanga	Rural	Male	Other Christian	Married (polygamous)	Informal agricultural	45-49	7			2756812	175200	48000	815936	369200	0	0	0	8000	0	0	229360	4402508	Matched (3)	0	0	6	No	No	45	Informal agricultural	Other Christian
2290	1	Pool de Lubu	999	Haut-Katanga	Urban	Female	Child of the household head	Congolaise	Protestant	6	Yes	229001	22900104	4	2290	1	4	Katanga	Urban	Male	Protestant	Married (monogamous)	Informal agricultural	35-39	6			2756812	175200	48000	815936	369200	0	0	0	8000	0	0	229360	4402508	Matched (3)	0	0	6	Yes	Yes	10	Informal agricultural	Protestant
7360	1	Pool de Buta	3	Bas-Uele	Rural	Male	Other parent	Congolaise	Catholic	6	Yes	736001	73600103	3	7360	1	3	Province Orientale	Rural	Male	Catholic	Married (monogamous)	Informal agricultural	25-29	5			2756812	175200	48000	815936	369200	0	0	0	8000	0	0	229360	4402508	Matched (3)	0	0	6	Yes	Yes	12	Informal agricultural	Catholic
3460	1	Pool de Bas	4	Tshopo	Township	Female	Spouse of the household head	Congolaise	Kimbanguist	6	No	346001	34600102	2	3460	1	2	Province Orientale	Urban	Male	Kimbanguist	Married (monogamous)	Public	55-59	3	13138.28324		217160	2440	31720	337635	7320	17080	0	0	0	0	0	0	613355	Matched (3)	0	0	6	No	No	38	Public	Kimbanguist
710	1	Pool de Mata	214	Kongo Centra	Urban	Female	Child of the household head	Congolaise	Other Christian	6	Yes	71001	7100108	8	710	1	8	Bas-Congo	Urban	Male	Catholic	Married (monogamous)	Public	55-59	10			2756812	175200	48000	815936	369200	0	0	0	8000	0	0	229360	4402508	Matched (3)	0	0	6	Yes	Yes	8	Public	Other Christian
2820	1	Pool de Tshi	999	Kasai	Urban	Female	Spouse of the household head	Congolaise	Other religion	6	No	282001	28200102	2	2820	1	2	Kasaî occidental	Urban	Male	Other religion	Married (monogamous)	Informal non-agricultural	35-39	3			1184500	0	0	176045	26840	0	0	0	0	0	0	6100	1393485	Matched (3)	0	0	6	No	No	23	Informal non-agricultural	Other religion
2690	1	Pool de Kana	999	Kasai-Centra	Urban	Male	Child of the household head	Congolaise	Other Christian	6	Yes	269001	26900105	5	2690	1	5	Kasaî occidental	Urban	Female	Other Christian	Widowed	Chomeurs	45-49	8	10369.85295		2756812	175200	48000	815936	369200	0	0	0	8000	0	0	229360	4402508	Matched (3)	0	0	6	Yes	Yes	14	Chomeurs	Other Christian
9840	1	Pool de Mwek	145	Kasai	Rural	Male	Other parent	Congolaise	Protestant	6	No	984001	98400103	3	9840	1	3	Kasaî occidental	Rural	Male	Protestant	Married (monogamous)	Public	20-24	3			2756812	175200	48000	815936	369200	0	0	0	8000	0	0	229360	4402508	Matched (3)	0	0	6	No	No	18	Public	Protestant
3880	1	Pool de Uvir	20	Sud-Kivu	Township	Female	Spouse of the household head	Congolaise	Other Christian	6	No	388001	38800102	2	3880	1	2	Sud-Kivu	Urban	Male	Other Christian	Married (monogamous)	Formal private sector	30-34	6	36000		2756812	175200	48000	815936	369200	0	0	0	8000	0	0	229360	4402508	Matched (3)	0	0	6	No	No	27	Formal private sector	Other Christian
3615	1	Isiro Cluster	2	Haut-Uele	Township	Male	Chef de ménage	Congolaise	Catholic	6	No	361501	36150101	1	3615	1	1	Province Orientale	Urban	Male	Catholic	Cohabiting	Informal agricultural	35-39	3	60000	50000	2756812	175200	48000	815936	369200	0	0	0	8000	0	0	229360	4402508	Matched (3)	0	0	6	No	No	38	Informal agricultural	Catholic
2310	1	Pool de Lubu	54	Haut-Katanga	Urban	Female	Child of the household head	Congolaise	Catholic	6	Yes	231001	23100106	6	2310	1	6	Katanga	Urban	Male	Catholic	Married (monogamous)	Informal non-agricultural	60-64	11			6320444	0	26000	120000	74000	1755040	0	312000	0	16025	0	139000	8762509	Matched (3)	.1828814	.1828814	6	Yes	Yes	19	Informal non-agricultural	Catholic
2730	1	Pool de Tshi	999	Kasai	Urban	Male	Chef de ménage	Congolaise	Other Christian	6	No	273001	27300101	1	2730	1	1	Kasaî occidental	Urban	Male	Other Christian	Married (monogamous)	Informal non-agricultural	35-39	7	60000	46036.13662	2756812	175200	48000	815936	369200	0	0	0	8000	0	0	229360	4402508	Matched (3)	0	0	6	No	No	36	Informal non-agricultural	Other Christian
7650	1	Pool de Beni	4	Nord-Kivu	Rural	Female	Spouse of the household head	Congolaise	Protestant	6	No	765001	76500102	2	7650	1	2	Nord-Kivu	Rural	Male	Other Christian	Married (monogamous)	Informal agricultural	35-39	6	10415.75519		2756812	175200	48000	815936	369200	0	0	0	8000	0	0	229360	4402508	Matched (3)	0	0	6	No	No	31	Informal agricultural	Protestant
720	1	Pool de Mata	36	Kongo Centra	Urban	Male	Child of the household head	Congolaise	Other Christian	6	Yes	72001	7200105	5	720	1	5	Bas-Congo	Urban	Male	Protestant	Married (monogamous)	Public	40-44	6			2756812	175200	48000	815936	369200	0	0	0	8000	0	0	229360	4402508	Matched (3)	0	0	6	Yes	Yes	10	Public	Other Christian
4320	1	Pool de Kase	999	Haut-Katanga	Township	Female	Spouse of the household head	Congolaise	Other Christian	6	No	432001	43200102	2	4320	1	2	Katanga	Urban	Male	Other Christian	Married (monogamous)	Informal agricultural	40-44	9	17000		2756812	175200	48000	815936	369200	0	0	0	8000	0	0	229360	4402508	Matched (3)	0	0	6	No	No	31	Informal agricultural	Other Christian
8520	1	Pool de Mano	999	Tanganyka	Rural	Female	Child of the household head	Congolaise	Catholic	6	Yes	852001	85200107	7	8520	1	7	Katanga	Rural	Male	Catholic	Married (monogamous)	Informal agricultural	35-39	8			2398680	0	0	950278	36000	19000	0	192000	0	22000	44400	141960	3804318	Matched (3)	.5782902	.5782902	6	Yes	Yes	9	Informal agricultural	Catholic
7190	1	Isiro Cluster	3	Haut-Uele	Rural	Female	Spouse of the household head	Congolaise	Catholic	6	No	719001	71900102	2	7190	1	2	Province Orientale	Rural	Male	Catholic	Cohabiting	Informal agricultural	55-59	8	40000		2756812	175200	48000	815936	369200	0	0	0	8000	0	0	229360	4402508	Matched (3)	0	0	6	No	No	53	Informal agricultural	Catholic
1260	1	Pool de Gbad	46	Nord-Ubangi	Urban	Male	Chef de ménage	Congolaise	Catholic	6	No	126001	12600101	1	1260	1	1	Equateur	Urban	Male	Catholic	Married (monogamous)	Informal agricultural	55-59	10	20000	48229.30497	1005092	0	0	21461	22523	0	0	0	0	0	0	0	1049076	Matched (3)	0	0	6	No	No	58	Informal agricultural	Catholic
560	1	Pool de Boma	82	Kongo Centra	Urban	Male	Child of the household head	Congolaise	Other Christian	6	Yes	56001	5600104	4	560	1	4	Bas-Congo	Urban	Male	Other Christian	Married (monogamous)	Public	40-44	8			2756812	175200	48000	815936	369200	0	0	0	8000	0	0	229360	4402508	Matched (3)	0	0	6	Yes	Yes	11	Public	Other Christian
1030	1	Pool de Mban	2	Equateur	Urban	Male	Chef de ménage	Congolaise	Catholic	6	No	103001	10300101	1	1030	1	1	Equateur	Urban	Male	Catholic	Married (monogamous)	Public	45-49	5	80000	15562.17207	2756812	175200	48000	815936	369200	0	0	0	8000	0	0	229360	4402508	Matched (3)	0	0	6	No	No	48	Public	Catholic
3830	1	Pool de Beni	2	Nord-Kivu	Township	Male	Child of the household head	Congolaise	Protestant	6	No	383001	38300104	4	3830	1	4	Nord-Kivu	Urban	Male	Protestant	Married (monogamous)	Informal agricultural	55-59	7	25000		2756812	175200	48000	815936	369200	0	0	0	8000	0	0	229360	4402508	Matched (3)	0	0	6	No	No	20	Informal agricultural	Protestant
40	1	Kinshasa Cluster	48	Kinshasa	Urban	Male	Chef de ménage	Congolaise	Protestant	6	No	4001	400101	1	40	1	1	Kinshasa	Urban	Male	Protestant	Married (monogamous)	Informal non-agricultural	35-39	2	20000		1855376	0	0	363617	4880	0	0	0	0	0	0	0	2223873	Matched (3)	0	0	6	No	No	38	Informal non-agricultural	Protestant
2070	1	Pool de Kolw	999	Lualaba	Urban	Male	Child of the household head	Congolaise	Protestant	6	Yes	207001	20700104	4	2070	1	4	Katanga	Urban	Male	Protestant	Married (monogamous)	Informal non-agricultural	35-39	8			2756812	175200	48000	815936	369200	0	0	0	8000	0	0	229360	4402508	Matched (3)	0	0	6	Yes	Yes	9	Informal non-agricultural	Protestant
3414	1	Pool de Boku	2	Tshuapa	Township	Male	Child of the household head	Congolaise	Other Christian	6	Yes	341401	34140105	5	3414	1	5	Equateur	Urban	Male	Other Christian	Married (monogamous)	Informal non-agricultural	50-54	6			2756812	175200	48000	815936	369200	0	0	0	8000	0	0	229360	4402508	Matched (3)	0	0	6	Yes	Yes	22	Informal non-agricultural	Other Christian
1020	1	Pool de Kikw	119	Kwilu	Urban	Female	Child of the household head	Congolaise	Catholic	6	Yes	102001	10200103	3	1020	1	3	Bandundu	Urban	Male	Catholic	Married (monogamous)	Informal non-agricultural	35-39	7			2756812	175200	48000	815936	369200	0	0	0	8000	0	0	229360	4402508	Matched (3)	0	0	6	Yes	Yes	13	Informal non-agricultural	Catholic
5150	1	Pool de Band	2	Mai-Ndombe	Rural	Female	Child of the household head	Congolaise	Protestant	6	Yes	515001	51500104	4	5150	1	4	Bandundu	Rural	Male	Other Christian	Widowed	Public	40-44	5			1119200	86620	184800	132735	36800	16000	0	0	10000	44000	0	21600	1651755	Matched (3)	2.663833	2.663833	6	Yes	Yes	8	Public	Protestant
430	1	Kinshasa Cluster	46	Kinshasa	Urban	Female	Child of the household head	Congolaise	Catholic	6	No	43001	4300103	3	430	1	3	Kinshasa	Urban	Male	Catholic	Widowed	Retired	70-74	6			2756812	175200	48000	815936	369200	0	0	0	8000	0	0	229360	4402508	Matched (3)	0	0	6	No	No	24	Retired	Catholic
9460	1	Pool de Mwen	999	Lomami	Rural	Female	Spouse of the household head	Congolaise	Protestant	6	No	946001	94600102	2	9460	1	2	Kasaî Oriental	Rural	Male	Protestant	Married (monogamous)	Informal agricultural	30-34	7	30000		2756812	175200	48000	815936	369200	0	0	0	8000	0	0	229360	4402508	Matched (3)	0	0	6	No	No	25	Informal agricultural	Protestant
2200	1	Pool de Lika	999	Haut-Katanga	Urban	Male	Child of the household head	Congolaise	Other Christian	6	Yes	220001	22000104	4	2200	1	4	Katanga	Urban	Male	Other Christian	Married (monogamous)	Informal non-agricultural	45-49	8			2756812	175200	48000	815936	369200	0	0	0	8000	0	0	229360	4402508	Matched (3)	0	0	6	Yes	Yes	15	Informal non-agricultural	Other Christian
6650	1	Pool de Boen	5	Tshuapa	Rural	Male	Other person	Congolaise	Other Christian	6	No	665001	66500108	8	6650	1	8	Equateur	Rural	Male	Other religion	Married (monogamous)	Informal agricultural	50-54	6			2756812	175200	48000	815936	369200	0	0	0	8000	0	0	229360	4402508	Matched (3)	0	0	6	No	No	35	Informal agricultural	Other Christian
2480	1	Mbuji-Mayi Cluster	999	Kasai-Orient	Urban	Female	Child of the household head	Congolaise	Other Christian	6	Yes	248001	24800105	5	2480	1	5	Kasaî Oriental	Urban	Male	Other Christian	Married (monogamous)	Formal private sector	60-64	6			2756812	175200	48000	815936	369200	0	0	0	8000	0	0	229360	4402508	Matched (3)	0	0	6	Yes	Yes	16	Formal private sector	Other Christian
1690	1	Pool de Beni	2	Nord-Kivu	Urban	Female	Child of the household head	Congolaise	Catholic	6	Yes	169001	16900103	3	1690	1	3	Nord-Kivu	Urban	Female	Catholic	Single	Informal non-agricultural	35-39	6			1205100	0	0	207928	18200	0	0	46800	0	0	0	0	1478028	Matched (3)	0	0	6	Yes	Yes	14	Informal non-agricultural	Catholic
930	1	Pool de Kikw	35	Kwilu	Urban	Female	Child of the household head	Congolaise	Other Christian	6	Yes	93001	9300103	3	930	1	3	Bandundu	Urban	Male	Catholic	Married (monogamous)	Informal non-agricultural	35-39	6			2756812	175200	48000	815936	369200	0	0	0	8000	0	0	229360	4402508	Matched (3)	0	0	6	Yes	Yes	10	Informal non-agricultural	Other Christian
2230	1	Pool de Lika	999	Haut-Katanga	Urban	Male	Chef de ménage	Congolaise	Other religion	6	No	223001	22300101	1	2230	1	1	Katanga	Urban	Male	Other religion	Married (monogamous)	Informal non-agricultural	50-54	8	80000		2756812	175200	48000	815936	369200	0	0	0	8000	0	0	229360	4402508	Matched (3)	0	0	6	No	No	53	Informal non-agricultural	Other religion
5460	1	Pool de Band	4	Kwilu	Rural	Female	Child of the household head	Congolaise	Protestant	6	Yes	546001	54600104	4	5460	1	4	Bandundu	Rural	Male	Protestant	Married (monogamous)	Public	35-39	7			961100	97600	30000	170222	21800	49976	134000	0	0	0	0	13200	1477898	Matched (3)	0	0	6	Yes	Yes	14	Public	Protestant
2680	1	Pool de Kana	999	Kasai-Centra	Urban	Male	Child of the household head	Congolaise	Catholic	6	Yes	268001	26800104	4	2680	1	4	Kasaî occidental	Urban	Male	Catholic	Married (monogamous)	Informal non-agricultural	40-44	6			943060	4880	0	97096	7320	0	0	0	0	0	14640	8700	1075696	Matched (3)	0	0	6	Yes	Yes	10	Informal non-agricultural	Catholic
8820	1	Pool de Kase	999	Haut-Katanga	Rural	Female	Spouse of the household head	Congolaise	Protestant	6	No	882001	88200102	2	8820	1	2	Katanga	Rural	Male	Protestant	Married (monogamous)	Informal agricultural	35-39	5	13764.56634		698215	0	0	552467	14077	0	42231	0	11262	0	0	59123	1377374	Matched (3)	0	0	6	No	No	34	Informal agricultural	Protestant
1970	1	Pool de Kind	44	Maniema	Urban	Female	Spouse of the household head	Congolaise	Other religion	6	No	197001	19700102	2	1970	1	2	Maniema	Urban	Male	Other religion	Married (monogamous)	Informal non-agricultural	25-29	5	15000		2756812	175200	48000	815936	369200	0	0	0	8000	0	0	229360	4402508	Matched (3)	0	0	6	No	No	21	Informal non-agricultural	Other religion
3250	1	Pool de Geme	2	Sud-Ubangi	Township	Male	Other parent	Congolaise	Other religion	6	No	325001	32500102	2	3250	1	2	Equateur	Urban	Male	Other religion	Single	Informal non-agricultural	30-34	2	12000		2756812	175200	48000	815936	369200	0	0	0	8000	0	0	229360	4402508	Matched (3)	0	0	6	No	No	26	Informal non-agricultural	Other religion
980	1	Pool de Kikw	149	Kwilu	Urban	Female	Child of the household head	Congolaise	Kimbanguist	6	Yes	98001	9800105	5	980	1	5	Bandundu	Urban	Male	Kimbanguist	Married (monogamous)	Public	50-54	9			2756812	175200	48000	815936	369200	0	0	0	8000	0	0	229360	4402508	Matched (3)	0	0	6	Yes	Yes	20	Public	Kimbanguist
3402	1	Pool de Lisa	8	Mongala	Township	Male	Child of the household head	Congolaise	Protestant	6	Yes	340201	34020104	4	3402	1	4	Equateur	Urban	Female	Protestant	Cohabiting	Inactive	35-39	7			2756812	175200	48000	815936	369200	0	0	0	8000	0	0	229360	4402508	Matched (3)	0	0	6	Yes	Yes	7	Inactive	Protestant
720	1	Pool de Mata	36	Kongo Centra	Urban	Female	Child of the household head	Congolaise	Other Christian	6	Yes	72001	7200103	3	720	1	3	Bas-Congo	Urban	Male	Protestant	Married (monogamous)	Public	40-44	6			2756812	175200	48000	815936	369200	0	0	0	8000	0	0	229360	4402508	Matched (3)	0	0	6	Yes	Yes	15	Public	Other Christian
3613	1	Isiro Cluster	2	Haut-Uele	Township	Male	Other parent	Congolaise	Catholic	6	Yes	361301	36130103	3	3613	1	3	Province Orientale	Urban	Male	Catholic	Cohabiting	Informal agricultural	30-34	5			2756812	175200	48000	815936	369200	0	0	0	8000	0	0	229360	4402508	Matched (3)	0	0	6	Yes	Yes	20	Informal agricultural	Catholic
3960	1	Pool de Uvir	132	Sud-Kivu	Township	Female	Other person	Congolaise	Catholic	6	Yes	396001	39600108	8	3960	1	8	Sud-Kivu	Urban	Female	Catholic	Married (monogamous)	Informal non-agricultural	55-59	11			2756812	175200	48000	815936	369200	0	0	0	8000	0	0	229360	4402508	Matched (3)	0	0	6	Yes	Yes	9	Informal non-agricultural	Catholic
3300	1	Pool de Gbad	9	Nord-Ubangi	Township	Male	Child of the household head	Congolaise	Other Christian	6	Yes	330001	33000106	6	3300	1	6	Equateur	Urban	Male	Catholic	Married (monogamous)	Informal agricultural	45-49	14			167140	0	97600	13927	8540	0	0	0	0	0	0	0	287207	Matched (3)	0	0	6	Yes	Yes	15	Informal agricultural	Other Christian
880	1	Pool de Band	28	Kwilu	Urban	Male	Child of the household head	Congolaise	Other Christian	6	No	88001	8800102	2	880	1	2	Bandundu	Urban	Female	Catholic	Widowed	Inactive	40-44	4			2756812	175200	48000	815936	369200	0	0	0	8000	0	0	229360	4402508	Matched (3)	0	0	6	No	No	24	Inactive	Other Christian
560	1	Pool de Boma	82	Kongo Centra	Urban	Female	Spouse of the household head	Congolaise	Other Christian	6	No	56001	5600102	2	560	1	2	Bas-Congo	Urban	Male	Other Christian	Married (monogamous)	Public	40-44	8			2756812	175200	48000	815936	369200	0	0	0	8000	0	0	229360	4402508	Matched (3)	0	0	6	No	No	31	Public	Other Christian
3405	1	Pool de Lisa	90	Mongala	Township	Male	Chef de ménage	Congolaise	Catholic	6	Yes	340501	34050101	1	3405	1	1	Equateur	Urban	Male	Catholic	Single	Inactive	20-24	1			2756812	175200	48000	815936	369200	0	0	0	8000	0	0	229360	4402508	Matched (3)	0	0	6	Yes	Yes	20	Inactive	Catholic
5660	1	Pool de Temb	7	Kwango	Rural	Male	Child of the household head	Congolaise	Catholic	6	Yes	566001	56600106	6	5660	1	6	Bandundu	Rural	Female	Catholic	Widowed	Informal agricultural	45-49	8			2756812	175200	48000	815936	369200	0	0	0	8000	0	0	229360	4402508	Matched (3)	0	0	6	Yes	Yes	13	Informal agricultural	Catholic
6220	1	Pool de Gbad	19	Nord-Ubangi	Rural	Male	Other parent	Congolaise	Catholic	6	Yes	622001	62200106	6	6220	1	6	Equateur	Rural	Male	Catholic	Married (polygamous)	Public	40-44	13	30000		2756812	175200	48000	815936	369200	0	0	0	8000	0	0	229360	4402508	Matched (3)	0	0	6	Yes	Yes	26	Public	Catholic
4480	1	Mbuji-Mayi Cluster	2	Kasai-Orient	Township	Female	Child of the household head	Congolaise	Other Christian	6	No	448001	44800106	6	4480	1	6	Kasaî Oriental	Urban	Female	Catholic	Widowed	Informal agricultural	60-64	7			2756812	175200	48000	815936	369200	0	0	0	8000	0	0	229360	4402508	Matched (3)	0	0	6	No	No	24	Informal agricultural	Other Christian
340	1	Kinshasa Cluster	4	Kinshasa	Urban	Male	Other parent	Congolaise	Catholic	6	No	34001	3400104	4	340	1	4	Kinshasa	Urban	Male	Other Christian	Married (monogamous)	Informal non-agricultural	50-54	7	18000		2756812	175200	48000	815936	369200	0	0	0	8000	0	0	229360	4402508	Matched (3)	0	0	6	No	No	65	Informal non-agricultural	Catholic
3830	1	Pool de Beni	2	Nord-Kivu	Township	Female	Child of the household head	Congolaise	Protestant	6	No	383001	38300107	7	3830	1	7	Nord-Kivu	Urban	Male	Protestant	Married (monogamous)	Informal agricultural	55-59	7	2500		2756812	175200	48000	815936	369200	0	0	0	8000	0	0	229360	4402508	Matched (3)	0	0	6	No	No	15	Informal agricultural	Protestant
2460	1	Mbuji-Mayi Cluster	999	Kasai-Orient	Urban	Female	Child of the household head	Congolaise	Other religion	6	Yes	246001	24600105	5	2460	1	5	Kasaî Oriental	Urban	Male	Other religion	Married (monogamous)	Public	45-49	8	1500		2756812	175200	48000	815936	369200	0	0	0	8000	0	0	229360	4402508	Matched (3)	0	0	6	Yes	Yes	14	Public	Other religion
7580	1	Pool de Beni	6	Nord-Kivu	Rural	Female	Child of the household head	Congolaise	Protestant	6	Yes	758001	75800103	3	7580	1	3	Nord-Kivu	Rural	Male	Catholic	Married (polygamous)	Informal agricultural	45-49	8			246440	48800	14640	123862	124440	20740	0	0	0	0	0	17080	596002	Matched (3)	0	0	6	Yes	Yes	19	Informal agricultural	Protestant
9120	1	Pool de Lodj	1	Sankuru	Rural	Female	Spouse of the household head	Congolaise	Other religion	6	No	912001	91200102	2	9120	1	2	Kasaî Oriental	Rural	Male	Other religion	Married (monogamous)	Informal agricultural	30-34	5	8591.407781		2034280	22692	8000	0	9880	20700	0	0	0	1200	0	6100	2102852	Matched (3)	.0570654	.0570654	6	No	No	26	Informal agricultural	Other religion
390	1	Kinshasa Cluster	111	Kinshasa	Urban	Male	Child of the household head	Congolaise	Protestant	6	Yes	39001	3900105	5	390	1	5	Kinshasa	Urban	Male	Protestant	Married (monogamous)	Formal private sector	45-49	8			2756812	175200	48000	815936	369200	0	0	0	8000	0	0	229360	4402508	Matched (3)	0	0	6	Yes	Yes	7	Formal private sector	Protestant
4480	1	Mbuji-Mayi Cluster	2	Kasai-Orient	Township	Female	Child of the household head	Congolaise	Catholic	6	Yes	448001	44800105	5	4480	1	5	Kasaî Oriental	Urban	Female	Catholic	Widowed	Informal agricultural	60-64	7			2756812	175200	48000	815936	369200	0	0	0	8000	0	0	229360	4402508	Matched (3)	0	0	6	Yes	Yes	29	Informal agricultural	Catholic
2910	1	Pool de INo	31	Mai-Ndombe	Township	Male	Child of the household head	Congolaise	Catholic	6	Yes	291001	29100105	5	2910	1	5	Bandundu	Urban	Male	Catholic	Married (monogamous)	Informal non-agricultural	55-59	8			2756812	175200	48000	815936	369200	0	0	0	8000	0	0	229360	4402508	Matched (3)	0	0	6	Yes	Yes	13	Informal non-agricultural	Catholic
1250	1	Pool de Gbad	125	Nord-Ubangi	Urban	Male	Child of the household head	Congolaise	Catholic	6	Yes	125001	12500107	7	1250	1	7	Equateur	Urban	Male	Catholic	Married (monogamous)	Informal agricultural	65-69	8			1087020	0	0	0	46360	0	0	0	0	0	0	4880	1138260	Matched (3)	0	0	6	Yes	Yes	12	Informal agricultural	Catholic
6000	1	Pool de Geme	5	Sud-Ubangi	Rural	Female	Spouse of the household head	Congolaise	Protestant	6	No	600001	60000102	2	6000	1	2	Equateur	Rural	Male	Protestant	Married (monogamous)	Informal non-agricultural	35-39	7	10000	10000	2756812	175200	48000	815936	369200	0	0	0	8000	0	0	229360	4402508	Matched (3)	0	0	6	No	No	37	Informal non-agricultural	Protestant
9250	1	Pool de Lusa	999	Sankuru	Rural	Male	Child of the household head	Congolaise	Other Christian	6	Yes	925001	92500104	4	9250	1	4	Kasaî Oriental	Rural	Male	Other Christian	Married (polygamous)	Public	30-34	6			2756812	175200	48000	815936	369200	0	0	0	8000	0	0	229360	4402508	Matched (3)	0	0	6	Yes	Yes	7	Public	Other Christian
2060	1	Pool de Kolw	999	Lualaba	Urban	Female	Spouse of the household head	Congolaise	Protestant	6	No	206001	20600102	2	2060	1	2	Katanga	Urban	Male	Protestant	Married (monogamous)	Formal private sector	45-49	6			2756812	175200	48000	815936	369200	0	0	0	8000	0	0	229360	4402508	Matched (3)	0	0	6	No	No	39	Formal private sector	Protestant
3380	1	Pool de Lisa	208	Mongala	Township	Male	Child of the household head	Congolaise	Catholic	6	Yes	338001	33800106	6	3380	1	6	Equateur	Urban	Male	Catholic	Married (polygamous)	Informal non-agricultural	65-69	9			2756812	175200	48000	815936	369200	0	0	0	8000	0	0	229360	4402508	Matched (3)	0	0	6	Yes	Yes	13	Informal non-agricultural	Catholic
820	1	Pool de Band	39	Kwilu	Urban	Female	Other parent	Congolaise	Other Christian	6	Yes	82001	8200107	7	820	1	7	Bandundu	Urban	Female	Catholic	Widowed	Informal non-agricultural	55-59	7			2756812	175200	48000	815936	369200	0	0	0	8000	0	0	229360	4402508	Matched (3)	0	0	6	Yes	Yes	11	Informal non-agricultural	Other Christian
7740	1	Pool de Buka	52	Sud-Kivu	Rural	Male	Child of the household head	Congolaise	Other religion	6	Yes	774001	77400104	4	7740	1	4	Sud-Kivu	Rural	Male	Other religion	Married (monogamous)	Informal non-agricultural	40-44	10			635271	0	0	0	0	0	0	0	0	0	0	0	635271	Matched (3)	0	0	6	Yes	Yes	19	Informal non-agricultural	Other religion
4690	1	Pool de Mwen	999	Lomami	Township	Male	Child of the household head	Congolaise	Other religion	6	Yes	469001	46900104	4	4690	1	4	Kasaî Oriental	Urban	Male	Other religion	Married (monogamous)	Public	35-39	9			2756812	175200	48000	815936	369200	0	0	0	8000	0	0	229360	4402508	Matched (3)	0	0	6	Yes	Yes	7	Public	Other religion
2380	1	Mbuji-Mayi Cluster	999	Kasai-Orient	Urban	Female	Child of the household head	Congolaise	Other Christian	6	Yes	238001	23800107	7	2380	1	7	Kasaî Oriental	Urban	Male	Other Christian	Married (monogamous)	Informal non-agricultural	45-49	7			2756812	175200	48000	815936	369200	0	0	0	8000	0	0	229360	4402508	Matched (3)	0	0	6	Yes	Yes	15	Informal non-agricultural	Other Christian
3490	1	Pool de Bas	3	Tshopo	Township	Female	Spouse of the household head	Congolaise	Other religion	6	No	349001	34900102	2	3490	1	2	Province Orientale	Urban	Male	Other religion	Married (monogamous)	Public	45-49	10	50000		2756812	175200	48000	815936	369200	0	0	0	8000	0	0	229360	4402508	Matched (3)	0	0	6	No	No	39	Public	Other religion
4100	1	Pool de Kasa	999	Lualaba	Township	Male	Child of the household head	Congolaise	Catholic	6	Yes	410001	41000103	3	4100	1	3	Katanga	Urban	Male	Catholic	Married (monogamous)	Public	50-54	3			2756812	175200	48000	815936	369200	0	0	0	8000	0	0	229360	4402508	Matched (3)	0	0	6	Yes	Yes	29	Public	Catholic
1230	1	Pool de Gbad	2	Nord-Ubangi	Urban	Male	Chef de ménage	Congolaise	Kimbanguist	6	No	123001	12300101	1	1230	1	1	Equateur	Urban	Male	Kimbanguist	Married (polygamous)	Public	40-44	6	80000		2756812	175200	48000	815936	369200	0	0	0	8000	0	0	229360	4402508	Matched (3)	0	0	6	No	No	41	Public	Kimbanguist
3300	1	Pool de Gbad	9	Nord-Ubangi	Township	Male	Chef de ménage	Congolaise	Catholic	6	No	330001	33000101	1	3300	1	1	Equateur	Urban	Male	Catholic	Married (monogamous)	Informal agricultural	45-49	14	301700.9358	100358.6104	2756812	175200	48000	815936	369200	0	0	0	8000	0	0	229360	4402508	Matched (3)	0	0	6	No	No	49	Informal agricultural	Catholic
1110	1	Pool de Mban	1	Equateur	Urban	Female	Spouse of the household head	Congolaise	Catholic	6	No	111001	11100102	2	1110	1	2	Equateur	Urban	Male	Catholic	Married (monogamous)	Inactive	40-44	5	14172.50627		2756812	175200	48000	815936	369200	0	0	0	8000	0	0	229360	4402508	Matched (3)	0	0	6	No	No	32	Inactive	Catholic
2720	1	Pool de Kana	999	Kasai-Centra	Urban	Female	Child of the household head	Congolaise	Protestant	6	Yes	272001	27200105	5	2720	1	5	Kasaî occidental	Urban	Male	Protestant	Married (monogamous)	Informal non-agricultural	45-49	6			2756812	175200	48000	815936	369200	0	0	0	8000	0	0	229360	4402508	Matched (3)	0	0	6	Yes	Yes	14	Informal non-agricultural	Protestant
4280	1	Pool de Mano	999	Tanganyka	Township	Female	Child of the household head	Congolaise	Protestant	6	Yes	428001	42800104	4	4280	1	4	Katanga	Urban	Female	Protestant	Widowed	Informal agricultural	45-49	8	4500	4500	2756812	175200	48000	815936	369200	0	0	0	8000	0	0	229360	4402508	Matched (3)	0	0	6	Yes	Yes	15	Informal agricultural	Protestant
4170	1	Pool de Kami	999	Haut-Lomami	Township	Female	Child of the household head	Congolaise	Other Christian	6	No	417001	41700102	2	4170	1	2	Katanga	Urban	Male	Other Christian	Widowed	Public	60-64	4			2756812	175200	48000	815936	369200	0	0	0	8000	0	0	229360	4402508	Matched (3)	0	0	6	No	No	24	Public	Other Christian
2940	1	Pool de Band	34	Mai-Ndombe	Township	Female	Child of the household head	Congolaise	Protestant	6	Yes	294001	29400103	3	2940	1	3	Bandundu	Urban	Male	Protestant	Married (monogamous)	Public	35-39	6			2756812	175200	48000	815936	369200	0	0	0	8000	0	0	229360	4402508	Matched (3)	0	0	6	Yes	Yes	9	Public	Protestant
8220	1	Pool de Kasa	999	Lualaba	Rural	Male	Chef de ménage	Congolaise	Other Christian	6	No	822001	82200101	1	8220	1	1	Katanga	Rural	Male	Other Christian	Married (monogamous)	Informal non-agricultural	25-29	5	50459.76576		2756812	175200	48000	815936	369200	0	0	0	8000	0	0	229360	4402508	Matched (3)	0	0	6	No	No	26	Informal non-agricultural	Other Christian
6580	1	Pool de Boen	1	Tshuapa	Rural	Male	Child of the household head	Congolaise	Other Christian	6	Yes	658001	65800106	6	6580	1	6	Equateur	Rural	Male	Other Christian	Married (monogamous)	Public	30-34	7			2756812	175200	48000	815936	369200	0	0	0	8000	0	0	229360	4402508	Matched (3)	0	0	6	Yes	Yes	10	Public	Other Christian
3540	1	Pool de Bun	17	Ituri	Township	Male	Chef de ménage	Congolaise	Catholic	6	No	354001	35400101	1	3540	1	1	Province Orientale	Urban	Male	Catholic	Married (monogamous)	Inactive	35-39	5			2756812	175200	48000	815936	369200	0	0	0	8000	0	0	229360	4402508	Matched (3)	0	0	6	No	No	38	Inactive	Catholic
1380	1	Kisangani Cluster	2	Tshopo	Urban	Female	Child of the household head	Congolaise	Protestant	6	Yes	138001	13800103	3	1380	1	3	Province Orientale	Urban	Male	Protestant	Married (monogamous)	Informal agricultural	30-34	11			1612840	0	0	995634	19520	0	0	0	0	0	0	0	2627994	Matched (3)	0	0	6	Yes	Yes	10	Informal agricultural	Protestant
1480	1	Pool de Beni	2	Nord-Kivu	Urban	Male	Chef de ménage	Congolaise	Other Christian	6	No	148001	14800101	1	1480	1	1	Nord-Kivu	Urban	Male	Other Christian	Married (monogamous)	Public	25-29	3	325500		646600	65880	0	50527	7320	0	0	0	0	0	0	0	770327	Matched (3)	0	0	6	No	No	29	Public	Other Christian
3183	1	Pool de Mban	29	Equateur	Township	Male	Child of the household head	Congolaise	Other Christian	6	Yes	318301	31830104	4	3183	1	4	Equateur	Urban	Male	Other Christian	Married (monogamous)	Informal non-agricultural	35-39	6			2414048	0	72000	137036	37522	294160	24000	0	0	0	70760	86000	3135526	Matched (3)	0	0	6	Yes	Yes	7	Informal non-agricultural	Other Christian
1410	1	Kisangani Cluster	22	Tshopo	Urban	Female	Child of the household head	Congolaise	Other Christian	6	Yes	141001	14100108	8	1410	1	8	Province Orientale	Urban	Male	Other Christian	Married (monogamous)	Informal non-agricultural	45-49	12			2756812	175200	48000	815936	369200	0	0	0	8000	0	0	229360	4402508	Matched (3)	0	0	6	Yes	Yes	6	Informal non-agricultural	Other Christian
170	1	Kinshasa Cluster	11	Kinshasa	Urban	Male	Other parent	Congolaise	Protestant	6	No	17001	1700103	3	170	1	3	Kinshasa	Urban	Male	Protestant	Married (monogamous)	Informal non-agricultural	80-84	3			2756812	175200	48000	815936	369200	0	0	0	8000	0	0	229360	4402508	Matched (3)	0	0	6	No	No	32	Informal non-agricultural	Protestant
2891	1	Pool de Song	8	Kongo Centra	Township	Male	Child of the household head	Congolaise	Catholic	6	Yes	289101	28910105	5	2891	1	5	Bas-Congo	Urban	Male	Catholic	Married (monogamous)	Informal non-agricultural	40-44	8			2756812	175200	48000	815936	369200	0	0	0	8000	0	0	229360	4402508	Matched (3)	0	0	6	Yes	Yes	8	Informal non-agricultural	Catholic
4300	1	Pool de Mano	999	Tanganyka	Township	Male	Child of the household head	Congolaise	Protestant	6	Yes	430001	43000104	4	4300	1	4	Katanga	Urban	Male	Protestant	Married (polygamous)	Informal non-agricultural	35-39	10	8000		2756812	175200	48000	815936	369200	0	0	0	8000	0	0	229360	4402508	Matched (3)	0	0	6	Yes	Yes	14	Informal non-agricultural	Protestant
5590	1	Pool de Keng	8	Kwango	Rural	Female	Child of the household head	Congolaise	Other Christian	6	Yes	559001	55900103	3	5590	1	3	Bandundu	Rural	Male	Other Christian	Cohabiting	Inactive	40-44	6			2756812	175200	48000	815936	369200	0	0	0	8000	0	0	229360	4402508	Matched (3)	0	0	6	Yes	Yes	11	Inactive	Other Christian
3920	1	Pool de Uvir	999	Sud-Kivu	Township	Female	Child of the household head	Congolaise	Protestant	6	Yes	392001	39200103	3	3920	1	3	Sud-Kivu	Urban	Male	Protestant	Married (monogamous)	Inactive	40-44	6			2041828	0	0	191571	100040	394548	0	793000	0	0	14640	0	3535627	Matched (3)	0	0	6	Yes	Yes	20	Inactive	Protestant
750	1	Pool de Mata	55	Kongo Centra	Urban	Male	Other parent	Congolaise	Protestant	6	Yes	75001	7500105	5	750	1	5	Bas-Congo	Urban	Male	Catholic	Married (monogamous)	Public	60-64	7			2756812	175200	48000	815936	369200	0	0	0	8000	0	0	229360	4402508	Matched (3)	0	0	6	Yes	Yes	24	Public	Protestant
9220	1	Pool de Lodj	6	Sankuru	Rural	Male	Child of the household head	Congolaise	Catholic	6	Yes	922001	92200109	9	9220	1	9	Kasaî Oriental	Rural	Male	Catholic	Married (monogamous)	Public	65-69	10			2756812	175200	48000	815936	369200	0	0	0	8000	0	0	229360	4402508	Matched (3)	0	0	6	Yes	Yes	8	Public	Catholic
3510	1	Pool de Bun	15	Ituri	Township	Male	Chef de ménage	Congolaise	Catholic	6	No	351001	35100101	1	3510	1	1	Province Orientale	Urban	Male	Catholic	Married (monogamous)	Public	60-64	18	60000		1320420	0	0	107360	0	0	0	0	0	0	0	0	1427780	Matched (3)	0	0	6	No	No	64	Public	Catholic
6580	1	Pool de Boen	1	Tshuapa	Rural	Male	Child of the household head	Congolaise	Other Christian	6	Yes	658001	65800102	2	6580	1	2	Equateur	Rural	Male	Other Christian	Married (monogamous)	Public	30-34	7			1279780	0	52000	288656	16400	16000	0	0	0	21000	0	14600	1688436	Matched (3)	1.243754	1.243754	6	Yes	Yes	20	Public	Other Christian
1830	1	Pool de Buka	42	Sud-Kivu	Urban	Male	Child of the household head	Congolaise	None	6	Yes	183001	18300104	4	1830	1	4	Sud-Kivu	Urban	Male	Protestant	Divorced	Informal non-agricultural	35-39	8			2756812	175200	48000	815936	369200	0	0	0	8000	0	0	229360	4402508	Matched (3)	0	0	6	Yes	Yes	10	Informal non-agricultural	None
5310	1	Pool de Kikw	1	Kwilu	Rural	Female	Child of the household head	Congolaise	Animist	6	No	531001	53100102	2	5310	1	2	Bandundu	Rural	Female	Other Christian	Widowed	Informal agricultural	50-54	4	21000		2756812	175200	48000	815936	369200	0	0	0	8000	0	0	229360	4402508	Matched (3)	0	0	6	No	No	33	Informal agricultural	Animist
3200	1	Pool de Basa	47	Equateur	Township	Male	Chef de ménage	Congolaise	Other Christian	6	No	320001	32000101	1	3200	1	1	Equateur	Urban	Male	Other Christian	Cohabiting	Informal non-agricultural	30-34	5	100006.3497		2756812	175200	48000	815936	369200	0	0	0	8000	0	0	229360	4402508	Matched (3)	0	0	6	No	No	33	Informal non-agricultural	Other Christian
6100	1	Pool de Gbad	7	Nord-Ubangi	Rural	Female	Child of the household head	Congolaise	Catholic	6	Yes	610001	61000103	3	6100	1	3	Equateur	Rural	Male	Catholic	Married (monogamous)	Informal agricultural	50-54	5			340760	62220	58500	220750	114340	35300	40000	0	14000	7000	15760	29600	938230	Matched (3)	.7460856	.7460856	6	Yes	Yes	18	Informal agricultural	Catholic
6910	1	Pool de Bun	1	Ituri	Rural	Female	Other parent	Congolaise	Protestant	6	Yes	691001	69100105	5	6910	1	5	Province Orientale	Rural	Male	Protestant	Married (monogamous)	Informal non-agricultural	40-44	8	1350		2756812	175200	48000	815936	369200	0	0	0	8000	0	0	229360	4402508	Matched (3)	0	0	6	Yes	Yes	15	Informal non-agricultural	Protestant
3960	1	Pool de Uvir	132	Sud-Kivu	Township	Female	Child of the household head	Congolaise	Catholic	6	No	396001	39600102	2	3960	1	2	Sud-Kivu	Urban	Female	Catholic	Married (monogamous)	Informal non-agricultural	55-59	11	0		2756812	175200	48000	815936	369200	0	0	0	8000	0	0	229360	4402508	Matched (3)	0	0	6	No	No	18	Informal non-agricultural	Catholic
4660	1	Pool de Kabi	999	Lomami	Township	Female	Child of the household head	Congolaise	Musulmane	6	No	466001	46600104	4	4660	1	4	Kasaî occidental	Urban	Male	Musulmane	Married (monogamous)	Inactive	65-69	6	70000		2756812	175200	48000	815936	369200	0	0	0	8000	0	0	229360	4402508	Matched (3)	0	0	6	No	No	25	Inactive	Musulmane
3470	1	Pool de Bas	19	Tshopo	Township	Female	Child of the household head	Congolaise	Other religion	6	Yes	347001	34700103	3	3470	1	3	Province Orientale	Urban	Male	Other religion	Married (monogamous)	Informal agricultural	45-49	5			2756812	175200	48000	815936	369200	0	0	0	8000	0	0	229360	4402508	Matched (3)	0	0	6	Yes	Yes	8	Informal agricultural	Other religion
6350	1	Pool de Lisa	4	Mongala	Rural	Male	Child of the household head	Congolaise	Protestant	6	Yes	635001	63500106	6	6350	1	6	Equateur	Rural	Male	None	Married (polygamous)	Informal agricultural	35-39	9			2756812	175200	48000	815936	369200	0	0	0	8000	0	0	229360	4402508	Matched (3)	0	0	6	Yes	Yes	9	Informal agricultural	Protestant
2590	1	Pool de Mwen	999	Lomami	Urban	Male	Chef de ménage	Congolaise	Catholic	6	No	259001	25900101	1	2590	1	1	Kasaî Oriental	Urban	Male	Catholic	Married (monogamous)	Formal private sector	25-29	3	66000	18838.97445	1113860	0	0	52336	14640	0	0	0	0	0	0	0	1180836	Matched (3)	0	0	6	No	No	29	Formal private sector	Catholic
4090	1	Pool de Kasa	999	Lualaba	Township	Male	Chef de ménage	Congolaise	Catholic	6	No	409001	40900101	1	4090	1	1	Katanga	Urban	Male	Catholic	Married (monogamous)	Informal agricultural	35-39	5	2000		2756812	175200	48000	815936	369200	0	0	0	8000	0	0	229360	4402508	Matched (3)	0	0	6	No	No	36	Informal agricultural	Catholic
9410	1	Pool de Kabi	999	Lomami	Rural	Female	Spouse of the household head	Congolaise	Protestant	6	No	941001	94100102	2	9410	1	2	Kasaî occidental	Rural	Male	Protestant	Married (monogamous)	Informal non-agricultural	25-29	7	30000		2756812	175200	48000	815936	369200	0	0	0	8000	0	0	229360	4402508	Matched (3)	0	0	6	No	No	24	Informal non-agricultural	Protestant
5860	1	Pool de Mban	2	Equateur	Rural	Female	Child of the household head	Congolaise	Protestant	6	Yes	586001	58600103	3	5860	1	3	Equateur	Rural	Male	Catholic	Married (monogamous)	Informal agricultural	45-49	9			2756812	175200	48000	815936	369200	0	0	0	8000	0	0	229360	4402508	Matched (3)	0	0	6	Yes	Yes	16	Informal agricultural	Protestant
6330	1	Pool de Lisa	1	Mongala	Rural	Female	Child of the household head	Congolaise	Catholic	6	Yes	633001	63300103	3	6330	1	3	Equateur	Rural	Male	Catholic	Cohabiting	Public	30-34	6			2756812	175200	48000	815936	369200	0	0	0	8000	0	0	229360	4402508	Matched (3)	0	0	6	Yes	Yes	8	Public	Catholic
4600	1	Pool de Lusa	999	Sankuru	Township	Female	Spouse of the household head	Congolaise	Protestant	6	No	460001	46000102	2	4600	1	2	Kasaî Oriental	Urban	Male	Protestant	Married (monogamous)	Informal non-agricultural	35-39	8			1393760	17080	0	177354	56740	0	0	0	25000	29000	0	4880	1703814	Matched (3)	1.702064	1.702064	6	No	No	32	Informal non-agricultural	Protestant
7310	1	Pool de Buta	4	Bas-Uele	Rural	Male	Child of the household head	Congolaise	Catholic	6	No	731001	73100103	3	7310	1	3	Province Orientale	Rural	Female	Catholic	Cohabiting	Informal agricultural	25-29	4			2756812	175200	48000	815936	369200	0	0	0	8000	0	0	229360	4402508	Matched (3)	0	0	6	No	No	6	Informal agricultural	Catholic
4370	1	Pool de Lubu	999	Haut-Katanga	Township	Male	Child of the household head	Congolaise	Protestant	6	Yes	437001	43700105	5	4370	1	5	Katanga	Urban	Male	Protestant	Married (monogamous)	Public	55-59	7			297680	0	0	39040	19520	0	0	0	0	0	0	0	356240	Matched (3)	0	0	6	Yes	Yes	20	Public	Protestant
6800	1	Pool de Bas	4	Tshopo	Rural	Male	Chef de ménage	Congolaise	Catholic	6	No	680001	68000101	1	6800	1	1	Province Orientale	Rural	Male	Catholic	Divorced	Informal agricultural	45-49	2	22000	3000	2756812	175200	48000	815936	369200	0	0	0	8000	0	0	229360	4402508	Matched (3)	0	0	6	No	No	48	Informal agricultural	Catholic
1730	1	Pool de Goma	2	Nord-Kivu	Urban	Female	Spouse of the household head	Congolaise	Protestant	6	Yes	173001	17300102	2	1730	1	2	Nord-Kivu	Urban	Male	Protestant	Married (monogamous)	Informal non-agricultural	35-39	2			280800	10400	0	0	91000	0	0	0	0	0	0	13000	395200	Matched (3)	0	0	6	Yes	Yes	23	Informal non-agricultural	Protestant
1240	1	Pool de Gbad	85	Nord-Ubangi	Urban	Male	Other parent	Congolaise	Catholic	6	Yes	124001	12400106	6	1240	1	6	Equateur	Urban	Male	Catholic	Married (monogamous)	Informal non-agricultural	35-39	6			2756812	175200	48000	815936	369200	0	0	0	8000	0	0	229360	4402508	Matched (3)	0	0	6	Yes	Yes	16	Informal non-agricultural	Catholic
3183	1	Pool de Mban	29	Equateur	Township	Female	Child of the household head	Congolaise	Other Christian	6	Yes	318301	31830103	3	3183	1	3	Equateur	Urban	Male	Other Christian	Married (monogamous)	Informal non-agricultural	35-39	6	42678.94785		2756812	175200	48000	815936	369200	0	0	0	8000	0	0	229360	4402508	Matched (3)	0	0	6	Yes	Yes	13	Informal non-agricultural	Other Christian
6500	1	Pool de Boku	2	Tshuapa	Rural	Male	Child of the household head	Congolaise	Catholic	6	Yes	650001	65000104	4	6500	1	4	Equateur	Rural	Male	Catholic	Married (monogamous)	Public	35-39	11			2756812	175200	48000	815936	369200	0	0	0	8000	0	0	229360	4402508	Matched (3)	0	0	6	Yes	Yes	15	Public	Catholic
5680	1	Pool de Mban	2	Equateur	Rural	Female	Spouse of the household head	Congolaise	Kimbanguist	6	No	568001	56800102	2	5680	1	2	Equateur	Rural	Male	Kimbanguist	Married (monogamous)	Informal agricultural	50-54	3	8000		2756812	175200	48000	815936	369200	0	0	0	8000	0	0	229360	4402508	Matched (3)	0	0	6	No	No	42	Informal agricultural	Kimbanguist
6910	1	Pool de Bun	1	Ituri	Rural	Male	Other parent	Congolaise	Protestant	6	Yes	691001	69100106	6	6910	1	6	Province Orientale	Rural	Male	Protestant	Married (monogamous)	Informal non-agricultural	40-44	8			2756812	175200	48000	815936	369200	0	0	0	8000	0	0	229360	4402508	Matched (3)	0	0	6	Yes	Yes	23	Informal non-agricultural	Protestant
4190	1	Pool de Kami	999	Haut-Lomami	Township	Male	Chef de ménage	Congolaise	Protestant	6	No	419001	41900101	1	4190	1	1	Katanga	Urban	Male	Protestant	Married (monogamous)	Inactive	45-49	2			503860	0	11200	141396	14640	4880	0	0	0	122000	21960	6100	826036	Matched (3)	14.76933	14.76933	6	No	No	46	Inactive	Protestant
8030	1	Pool de Pun	1	Maniema	Rural	Male	Child of the household head	Congolaise	Protestant	6	Yes	803001	80300109	9	8030	1	9	Maniema	Rural	Male	Protestant	Married (monogamous)	Informal agricultural	65-69	15			2756812	175200	48000	815936	369200	0	0	0	8000	0	0	229360	4402508	Matched (3)	0	0	6	Yes	Yes	22	Informal agricultural	Protestant
3480	1	Pool de Bas	19	Tshopo	Township	Male	Child of the household head	Congolaise	Catholic	6	Yes	348001	34800103	3	3480	1	3	Province Orientale	Urban	Male	Catholic	Married (monogamous)	Public	60-64	6			1260260	0	26000	0	23900	0	0	0	7800	0	0	26000	1343960	Matched (3)	0	0	6	Yes	Yes	24	Public	Catholic
3190	1	Pool de Basa	999	Equateur	Township	Female	Child of the household head	Congolaise	Other Christian	6	Yes	319001	31900107	7	3190	1	7	Equateur	Urban	Male	Other Christian	Married (monogamous)	Informal agricultural	35-39	10			2756812	175200	48000	815936	369200	0	0	0	8000	0	0	229360	4402508	Matched (3)	0	0	6	Yes	Yes	9	Informal agricultural	Other Christian
4791	1	Pool de Mwek	12	Kasai	Township	Female	Child of the household head	Congolaise	Other Christian	6	Yes	479101	47910103	3	4791	1	3	Kasaî occidental	Urban	Female	Other Christian	Married (polygamous)	Informal non-agricultural	30-34	10			2756812	175200	48000	815936	369200	0	0	0	8000	0	0	229360	4402508	Matched (3)	0	0	6	Yes	Yes	19	Informal non-agricultural	Other Christian
1780	1	Pool de Goma	88	Nord-Kivu	Urban	Female	Other parent	Congolaise	Catholic	6	No	178001	17800103	3	1780	1	3	Nord-Kivu	Urban	Male	Catholic	Married (monogamous)	Public	30-34	4	180000		630740	87840	0	0	37820	0	0	0	0	0	0	48060	804460	Matched (3)	0	0	6	No	No	25	Public	Catholic
3670	1	Pool de Buta	9	Bas-Uele	Township	Male	Other person	Congolaise	Protestant	6	Yes	367001	36700103	3	3670	1	3	Province Orientale	Urban	Female	Musulmane	Widowed	Informal non-agricultural	30-34	6			2756812	175200	48000	815936	369200	0	0	0	8000	0	0	229360	4402508	Matched (3)	0	0	6	Yes	Yes	7	Informal non-agricultural	Protestant
3670	1	Pool de Buta	9	Bas-Uele	Township	Female	Chef de ménage	Congolaise	Musulmane	6	No	367001	36700101	1	3670	1	1	Province Orientale	Urban	Female	Musulmane	Widowed	Informal non-agricultural	30-34	6	25000		2756812	175200	48000	815936	369200	0	0	0	8000	0	0	229360	4402508	Matched (3)	0	0	6	No	No	33	Informal non-agricultural	Musulmane
5790	1	Pool de Basa	2	Equateur	Rural	Male	Chef de ménage	Congolaise	Other Christian	6	No	579001	57900101	1	5790	1	1	Equateur	Rural	Male	Other Christian	Married (monogamous)	Informal non-agricultural	45-49	7	0	56275.93766	2756812	175200	48000	815936	369200	0	0	0	8000	0	0	229360	4402508	Matched (3)	0	0	6	No	No	47	Informal non-agricultural	Other Christian
420	1	Kinshasa Cluster	19	Kinshasa	Urban	Female	Spouse of the household head	Congolaise	Catholic	6	No	42001	4200102	2	420	1	2	Kinshasa	Urban	Male	Catholic	Married (monogamous)	Public	50-54	9	110000		2756812	175200	48000	815936	369200	0	0	0	8000	0	0	229360	4402508	Matched (3)	0	0	6	No	No	42	Public	Catholic
6590	1	Pool de Boku	3	Tshuapa	Rural	Male	Child of the household head	Congolaise	Catholic	6	Yes	659001	65900104	4	6590	1	4	Equateur	Rural	Male	Catholic	Married (monogamous)	Informal agricultural	50-54	11			2756812	175200	48000	815936	369200	0	0	0	8000	0	0	229360	4402508	Matched (3)	0	0	6	Yes	Yes	23	Informal agricultural	Catholic
4390	1	Pool de Lubu	999	Haut-Katanga	Township	Female	Child of the household head	Congolaise	Catholic	6	Yes	439001	43900104	4	4390	1	4	Katanga	Urban	Male	Catholic	Married (monogamous)	Retired	55-59	11			2756812	175200	48000	815936	369200	0	0	0	8000	0	0	229360	4402508	Matched (3)	0	0	6	Yes	Yes	20	Retired	Catholic
4620	1	Pool de Kabi	999	Lomami	Township	Male	Child of the household head	Congolaise	Protestant	6	Yes	462001	46200103	3	4620	1	3	Kasaî occidental	Urban	Female	Catholic	Widowed	Informal non-agricultural	65-69	10	34200		2756812	175200	48000	815936	369200	0	0	0	8000	0	0	229360	4402508	Matched (3)	0	0	6	Yes	Yes	25	Informal non-agricultural	Protestant
3453	1	Pool de Bas	2	Tshopo	Township	Male	Child of the household head	Congolaise	Catholic	6	Yes	345301	34530106	6	3453	1	6	Province Orientale	Urban	Male	Catholic	Married (monogamous)	Informal agricultural	45-49	8			2756812	175200	48000	815936	369200	0	0	0	8000	0	0	229360	4402508	Matched (3)	0	0	6	Yes	Yes	7	Informal agricultural	Catholic
4160	1	Pool de Kami	999	Haut-Lomami	Township	Male	Child of the household head	Congolaise	Other Christian	6	No	416001	41600104	4	4160	1	4	Katanga	Urban	Male	Other Christian	Married (monogamous)	Inactive	40-44	7			2756812	175200	48000	815936	369200	0	0	0	8000	0	0	229360	4402508	Matched (3)	0	0	6	No	No	22	Inactive	Other Christian
7160	1	Isiro Cluster	2	Haut-Uele	Rural	Female	Child of the household head	Congolaise	Protestant	6	Yes	716001	71600104	4	7160	1	4	Province Orientale	Rural	Male	Protestant	Married (monogamous)	Informal agricultural	50-54	9			2756812	175200	48000	815936	369200	0	0	0	8000	0	0	229360	4402508	Matched (3)	0	0	6	Yes	Yes	17	Informal agricultural	Protestant
990	1	Pool de Kikw	6	Kwilu	Urban	Female	Other parent	Congolaise	Other religion	6	No	99001	9900104	4	990	1	4	Bandundu	Urban	Male	Catholic	Single	Public	30-34	3			2756812	175200	48000	815936	369200	0	0	0	8000	0	0	229360	4402508	Matched (3)	0	0	6	No	No	54	Public	Other religion
6150	1	Pool de Gbad	76	Nord-Ubangi	Rural	Male	Chef de ménage	Congolaise	Other Christian	6	No	615001	61500101	1	6150	1	1	Equateur	Rural	Male	Other Christian	Married (monogamous)	Informal agricultural	45-49	8	32000		1116300	0	0	626672	3660	0	0	0	0	0	0	0	1746632	Matched (3)	0	0	6	No	No	49	Informal agricultural	Other Christian
2230	1	Pool de Lika	999	Haut-Katanga	Urban	Female	Child of the household head	Congolaise	Other religion	6	No	223001	22300106	6	2230	1	6	Katanga	Urban	Male	Other religion	Married (monogamous)	Informal non-agricultural	50-54	8			1659200	0	58000	0	29097	20320	0	0	0	0	0	4880	1771497	Matched (3)	0	0	6	No	No	12	Informal non-agricultural	Other religion
1810	1	Pool de Goma	4	Nord-Kivu	Urban	Female	Chef de ménage	Congolaise	Catholic	6	No	181001	18100101	1	1810	1	1	Nord-Kivu	Urban	Female	Catholic	Divorced	Informal non-agricultural	40-44	4	90000		2756812	175200	48000	815936	369200	0	0	0	8000	0	0	229360	4402508	Matched (3)	0	0	6	No	No	40	Informal non-agricultural	Catholic
1010	1	Pool de Kikw	44	Kwilu	Urban	Female	Child of the household head	Congolaise	Catholic	6	Yes	101001	10100105	5	1010	1	5	Bandundu	Urban	Male	Catholic	Married (monogamous)	Formal private sector	40-44	7			2756812	175200	48000	815936	369200	0	0	0	8000	0	0	229360	4402508	Matched (3)	0	0	6	Yes	Yes	8	Formal private sector	Catholic
9410	1	Pool de Kabi	999	Lomami	Rural	Female	Other parent	Congolaise	Protestant	6	Yes	941001	94100105	5	9410	1	5	Kasaî occidental	Rural	Male	Protestant	Married (monogamous)	Informal non-agricultural	25-29	7			2756812	175200	48000	815936	369200	0	0	0	8000	0	0	229360	4402508	Matched (3)	0	0	6	Yes	Yes	NSP	Informal non-agricultural	Protestant
5830	1	Pool de Mban	1	Equateur	Rural	Female	Child of the household head	Congolaise	Catholic	6	Yes	583001	58300103	3	5830	1	3	Equateur	Rural	Male	Catholic	Married (monogamous)	Informal agricultural	55-59	6			2756812	175200	48000	815936	369200	0	0	0	8000	0	0	229360	4402508	Matched (3)	0	0	6	Yes	Yes	22	Informal agricultural	Catholic
2760	1	Pool de Tshi	999	Kasai	Urban	Male	Child of the household head	Congolaise	Animist	6	No	276001	27600102	2	2760	1	2	Kasaî occidental	Urban	Female	Animist	Widowed	Inactive	50-54	2			2756812	175200	48000	815936	369200	0	0	0	8000	0	0	229360	4402508	Matched (3)	0	0	6	No	No	12	Inactive	Animist
3960	1	Pool de Uvir	132	Sud-Kivu	Township	Male	Other person	Congolaise	Catholic	6	Yes	396001	39600106	6	3960	1	6	Sud-Kivu	Urban	Female	Catholic	Married (monogamous)	Informal non-agricultural	55-59	11			2756812	175200	48000	815936	369200	0	0	0	8000	0	0	229360	4402508	Matched (3)	0	0	6	Yes	Yes	13	Informal non-agricultural	Catholic
6970	1	Pool de Bun	2	Ituri	Rural	Male	Other parent	Congolaise	Catholic	6	Yes	697001	69700109	9	6970	1	9	Province Orientale	Rural	Male	Catholic	Married (polygamous)	Informal agricultural	55-59	11			2756812	175200	48000	815936	369200	0	0	0	8000	0	0	229360	4402508	Matched (3)	0	0	6	Yes	Yes	7	Informal agricultural	Catholic
9020	1	Mbuji-Mayi Cluster	999	Kasai-Orient	Rural	Female	Child of the household head	Congolaise	Protestant	6	Yes	902001	90200106	6	9020	1	6	Kasaî Oriental	Rural	Male	Protestant	Married (polygamous)	Informal agricultural	55-59	7			2756812	175200	48000	815936	369200	0	0	0	8000	0	0	229360	4402508	Matched (3)	0	0	6	Yes	Yes	13	Informal agricultural	Protestant
2840	1	Pool de Tshi	999	Kasai	Urban	Male	Child of the household head	Congolaise	Protestant	6	Yes	284001	28400102	2	2840	1	2	Kasaî occidental	Urban	Female	Protestant	Widowed	Public	35-39	5			2756812	175200	48000	815936	369200	0	0	0	8000	0	0	229360	4402508	Matched (3)	0	0	6	Yes	Yes	20	Public	Protestant
810	1	Pool de Band	68	Kwilu	Urban	Male	Chef de ménage	Congolaise	Catholic	6	No	81001	8100101	1	810	1	1	Bandundu	Urban	Male	Catholic	Married (monogamous)	Public	40-44	5	55000		2756812	175200	48000	815936	369200	0	0	0	8000	0	0	229360	4402508	Matched (3)	0	0	6	No	No	42	Public	Catholic
4802	1	Pool de Mwek	5	Kasai	Township	Female	Chef de ménage	Congolaise	None	6	No	480201	48020101	1	4802	1	1	Kasaî occidental	Urban	Female	None	Divorced	Informal non-agricultural	40-44	2			2756812	175200	48000	815936	369200	0	0	0	8000	0	0	229360	4402508	Matched (3)	0	0	6	No	No	42	Informal non-agricultural	None
3300	1	Pool de Gbad	9	Nord-Ubangi	Township	Male	Child of the household head	Congolaise	Other Christian	6	Yes	330001	33000104	4	3300	1	4	Equateur	Urban	Male	Catholic	Married (monogamous)	Informal agricultural	45-49	14			2756812	175200	48000	815936	369200	0	0	0	8000	0	0	229360	4402508	Matched (3)	0	0	6	Yes	Yes	22	Informal agricultural	Other Christian
3140	1	Pool de Keng	4	Kwango	Township	Female	Child of the household head	Congolaise	Catholic	6	Yes	314001	31400104	4	3140	1	4	Bandundu	Urban	Male	Catholic	Married (monogamous)	Informal agricultural	65-69	5			2756812	175200	48000	815936	369200	0	0	0	8000	0	0	229360	4402508	Matched (3)	0	0	6	Yes	Yes	12	Informal agricultural	Catholic
7980	1	Pool de Kind	3	Maniema	Rural	Male	Other parent	Congolaise	Protestant	6	No	798001	79800107	7	7980	1	7	Maniema	Rural	Male	Other Christian	Married (polygamous)	Informal agricultural	45-49	7			2756812	175200	48000	815936	369200	0	0	0	8000	0	0	229360	4402508	Matched (3)	0	0	6	No	No	20	Informal agricultural	Protestant
9240	1	Pool de Lusa	999	Sankuru	Rural	Female	Child of the household head	Congolaise	Protestant	6	Yes	924001	92400105	5	9240	1	5	Kasaî Oriental	Rural	Female	Protestant	Widowed	Informal agricultural	40-44	9			2756812	175200	48000	815936	369200	0	0	0	8000	0	0	229360	4402508	Matched (3)	0	0	6	Yes	Yes	10	Informal agricultural	Protestant
4440	1	Mbuji-Mayi Cluster	999	Kasai-Orient	Township	Male	Child of the household head	Congolaise	Catholic	6	Yes	444001	44400105	5	4440	1	5	Kasaî Oriental	Urban	Male	Catholic	Married (polygamous)	Informal agricultural	65-69	7			2756812	175200	48000	815936	369200	0	0	0	8000	0	0	229360	4402508	Matched (3)	0	0	6	Yes	Yes	7	Informal agricultural	Catholic
4791	1	Pool de Mwek	12	Kasai	Township	Female	Chef de ménage	Congolaise	Other Christian	6	No	479101	47910101	1	4791	1	1	Kasaî occidental	Urban	Female	Other Christian	Married (polygamous)	Informal non-agricultural	30-34	10	16000		2756812	175200	48000	815936	369200	0	0	0	8000	0	0	229360	4402508	Matched (3)	0	0	6	No	No	30	Informal non-agricultural	Other Christian
2030	1	Pool de Kolw	999	Lualaba	Urban	Male	Chef de ménage	Congolaise	Protestant	6	No	203001	20300101	1	2030	1	1	Katanga	Urban	Male	Protestant	Married (monogamous)	Informal non-agricultural	45-49	5	97300		2756812	175200	48000	815936	369200	0	0	0	8000	0	0	229360	4402508	Matched (3)	0	0	6	No	No	49	Informal non-agricultural	Protestant
1780	1	Pool de Goma	88	Nord-Kivu	Urban	Female	Spouse of the household head	Congolaise	Catholic	6	No	178001	17800102	2	1780	1	2	Nord-Kivu	Urban	Male	Catholic	Married (monogamous)	Public	30-34	4			2756812	175200	48000	815936	369200	0	0	0	8000	0	0	229360	4402508	Matched (3)	0	0	6	No	No	23	Public	Catholic
4760	1	Pool de Kana	999	Kasai-Centra	Township	Male	Other parent	Congolaise	Other Christian	6	Yes	476001	47600108	8	4760	1	8	Kasaî occidental	Urban	Male	Other Christian	Married (monogamous)	Public	60-64	15			1155340	100040	0	29280	153720	0	0	0	0	0	0	19520	1457900	Matched (3)	0	0	6	Yes	Yes	10	Public	Other Christian
5440	1	Pool de Band	5	Kwilu	Rural	Female	Child of the household head	Congolaise	Protestant	6	Yes	544001	54400103	3	5440	1	3	Bandundu	Rural	Male	Protestant	Married (monogamous)	Informal agricultural	35-39	5			25067	0	41500	25341	18450	4000	0	0	0	0	0	5000	119357	Matched (3)	0	0	6	Yes	Yes	7	Informal agricultural	Protestant
9610	1	Pool de Kana	999	Kasai-Centra	Rural	Male	Child of the household head	Congolaise	Catholic	6	Yes	961001	96100105	5	9610	1	5	Kasaî occidental	Rural	Male	Catholic	Married (monogamous)	Informal agricultural	45-49	6			736880	0	0	110897	58560	0	0	0	0	0	0	0	906337	Matched (3)	0	0	6	Yes	Yes	7	Informal agricultural	Catholic
8180	1	Pool de Kolw	999	Lualaba	Rural	Female	Child of the household head	Congolaise	Catholic	6	Yes	818001	81800104	4	8180	1	4	Katanga	Rural	Female	Catholic	Married (polygamous)	Informal agricultural	40-44	6			2756812	175200	48000	815936	369200	0	0	0	8000	0	0	229360	4402508	Matched (3)	0	0	6	Yes	Yes	8	Informal agricultural	Catholic
9000	1	Mbuji-Mayi Cluster	999	Kasai-Orient	Rural	Male	Child of the household head	Congolaise	Protestant	6	Yes	900001	90000107	7	9000	1	7	Kasaî Oriental	Rural	Male	Protestant	Married (polygamous)	Informal agricultural	50-54	7			2756812	175200	48000	815936	369200	0	0	0	8000	0	0	229360	4402508	Matched (3)	0	0	6	Yes	Yes	14	Informal agricultural	Protestant
9730	1	Pool de Mwek	6	Kasai	Rural	Female	Child of the household head	Congolaise	Other Christian	6	Yes	973001	97300107	7	9730	1	7	Kasaî occidental	Rural	Male	Other Christian	Married (monogamous)	Informal agricultural	50-54	8			2756812	175200	48000	815936	369200	0	0	0	8000	0	0	229360	4402508	Matched (3)	0	0	6	Yes	Yes	11	Informal agricultural	Other Christian
2460	1	Mbuji-Mayi Cluster	999	Kasai-Orient	Urban	Male	Child of the household head	Congolaise	Other religion	6	Yes	246001	24600106	6	2460	1	6	Kasaî Oriental	Urban	Male	Other religion	Married (monogamous)	Public	45-49	8			2756812	175200	48000	815936	369200	0	0	0	8000	0	0	229360	4402508	Matched (3)	0	0	6	Yes	Yes	10	Public	Other religion
1570	1	Pool de Beni	2	Nord-Kivu	Urban	Male	Chef de ménage	Congolaise	Catholic	6	No	157001	15700101	1	1570	1	1	Nord-Kivu	Urban	Male	Catholic	Widowed	Informal agricultural	60-64	2	7000		2756812	175200	48000	815936	369200	0	0	0	8000	0	0	229360	4402508	Matched (3)	0	0	6	No	No	63	Informal agricultural	Catholic
120	1	Kinshasa Cluster	14	Kinshasa	Urban	Male	Child of the household head	Congolaise	Other Christian	6	No	12001	1200103	3	120	1	3	Kinshasa	Urban	Female	Animist	Widowed	Informal non-agricultural	50-54	9			2756812	175200	48000	815936	369200	0	0	0	8000	0	0	229360	4402508	Matched (3)	0	0	6	No	No	24	Informal non-agricultural	Other Christian
1690	1	Pool de Beni	2	Nord-Kivu	Urban	Male	Child of the household head	Congolaise	Catholic	6	Yes	169001	16900104	4	1690	1	4	Nord-Kivu	Urban	Female	Catholic	Single	Informal non-agricultural	35-39	6			2756812	175200	48000	815936	369200	0	0	0	8000	0	0	229360	4402508	Matched (3)	0	0	6	Yes	Yes	10	Informal non-agricultural	Catholic
2210	1	Pool de Lika	999	Haut-Katanga	Urban	Female	Spouse of the household head	Congolaise	Other Christian	6	No	221001	22100102	2	2210	1	2	Katanga	Urban	Male	Other Christian	Married (monogamous)	Chomeurs	50-54	3			2756812	175200	48000	815936	369200	0	0	0	8000	0	0	229360	4402508	Matched (3)	0	0	6	No	No	25	Chomeurs	Other Christian
9220	1	Pool de Lodj	6	Sankuru	Rural	Male	Child of the household head	Congolaise	Catholic	6	Yes	922001	92200104	4	9220	1	4	Kasaî Oriental	Rural	Male	Catholic	Married (monogamous)	Public	65-69	10			3388929	156857	285000	1750003	241000	0	2912000	250812	460000	648000	456857	7142400	17691858	Matched (3)	3.662702	3.662702	6	Yes	Yes	21	Public	Catholic
2600	1	Pool de Mwen	999	Lomami	Urban	Male	Chef de ménage	Congolaise	Other Christian	6	No	260001	26000101	1	2600	1	1	Kasaî Oriental	Urban	Male	Other Christian	Married (monogamous)	Public	45-49	4	60000		2756812	175200	48000	815936	369200	0	0	0	8000	0	0	229360	4402508	Matched (3)	0	0	6	No	No	48	Public	Other Christian
7340	1	Pool de Buta	2	Bas-Uele	Rural	Male	Chef de ménage	Congolaise	Catholic	6	No	734001	73400101	1	7340	1	1	Province Orientale	Rural	Male	Catholic	Married (monogamous)	Informal agricultural	30-34	8	16931.43575		2756812	175200	48000	815936	369200	0	0	0	8000	0	0	229360	4402508	Matched (3)	0	0	6	No	No	32	Informal agricultural	Catholic
3530	1	Pool de Bun	5	Ituri	Township	Male	Chef de ménage	Congolaise	Catholic	6	No	353001	35300101	1	3530	1	1	Province Orientale	Urban	Male	Catholic	Married (monogamous)	Formal private sector	65-69	10	64000	10000	2756812	175200	48000	815936	369200	0	0	0	8000	0	0	229360	4402508	Matched (3)	0	0	6	No	No	67	Formal private sector	Catholic
3000	1	Pool de Band	3	Kwilu	Township	Female	Child of the household head	Congolaise	Other religion	6	Yes	300001	30000103	3	3000	1	3	Bandundu	Urban	Male	Catholic	Married (monogamous)	Public	70-74	6			2756812	175200	48000	815936	369200	0	0	0	8000	0	0	229360	4402508	Matched (3)	0	0	6	Yes	Yes	15	Public	Other religion
9420	1	Pool de Kabi	999	Lomami	Rural	Female	Child of the household head	Congolaise	Other Christian	6	Yes	942001	94200102	2	9420	1	2	Kasaî occidental	Rural	Female	Other Christian	Married (polygamous)	Informal agricultural	40-44	7			2756812	175200	48000	815936	369200	0	0	0	8000	0	0	229360	4402508	Matched (3)	0	0	6	Yes	Yes	15	Informal agricultural	Other Christian
9620	1	Pool de Kana	999	Kasai-Centra	Rural	Female	Other parent	Congolaise	Other Christian	6	No	962001	96200107	7	9620	1	7	Kasaî occidental	Rural	Male	Other Christian	Married (monogamous)	Informal agricultural	45-49	10	7321.371469		2756812	175200	48000	815936	369200	0	0	0	8000	0	0	229360	4402508	Matched (3)	0	0	6	No	No	21	Informal agricultural	Other Christian
6220	1	Pool de Gbad	19	Nord-Ubangi	Rural	Male	Child of the household head	Congolaise	Catholic	6	Yes	622001	62200108	8	6220	1	8	Equateur	Rural	Male	Catholic	Married (polygamous)	Public	40-44	13			2756812	175200	48000	815936	369200	0	0	0	8000	0	0	229360	4402508	Matched (3)	0	0	6	Yes	Yes	12	Public	Catholic
4890	1	Pool de Mata	3	Kongo Centra	Rural	Male	Child of the household head	Congolaise	Protestant	6	Yes	489001	48900106	6	4890	1	6	Bas-Congo	Rural	Male	Catholic	Married (monogamous)	Informal agricultural	45-49	10			2756812	175200	48000	815936	369200	0	0	0	8000	0	0	229360	4402508	Matched (3)	0	0	6	Yes	Yes	10	Informal agricultural	Protestant
820	1	Pool de Band	39	Kwilu	Urban	Female	Child of the household head	Congolaise	Other Christian	6	Yes	82001	8200105	5	820	1	5	Bandundu	Urban	Female	Catholic	Widowed	Informal non-agricultural	55-59	7			2756812	175200	48000	815936	369200	0	0	0	8000	0	0	229360	4402508	Matched (3)	0	0	6	Yes	Yes	15	Informal non-agricultural	Other Christian
2310	1	Pool de Lubu	54	Haut-Katanga	Urban	Female	Child of the household head	Congolaise	Catholic	6	Yes	231001	23100107	7	2310	1	7	Katanga	Urban	Male	Catholic	Married (monogamous)	Informal non-agricultural	60-64	11			917440	0	0	48800	42700	12200	0	14640	0	0	0	46360	1082140	Matched (3)	0	0	6	Yes	Yes	9	Informal non-agricultural	Catholic
2990	1	Pool de Band	9	Kwilu	Township	Male	Child of the household head	Congolaise	Other religion	6	Yes	299001	29900103	3	2990	1	3	Bandundu	Urban	Male	Other religion	Married (monogamous)	Public	45-49	6			2756812	175200	48000	815936	369200	0	0	0	8000	0	0	229360	4402508	Matched (3)	0	0	6	Yes	Yes	19	Public	Other religion
740	1	Pool de Mata	46	Kongo Centra	Urban	Female	Spouse of the household head	Congolaise	Kimbanguist	6	No	74001	7400102	2	740	1	2	Bas-Congo	Urban	Male	Kimbanguist	Married (monogamous)	Public	40-44	6	97558.27259		2756812	175200	48000	815936	369200	0	0	0	8000	0	0	229360	4402508	Matched (3)	0	0	6	No	No	30	Public	Kimbanguist
5850	1	Pool de Mban	3	Equateur	Rural	Female	Spouse of the household head	Congolaise	Catholic	6	No	585001	58500102	2	5850	1	2	Equateur	Rural	Male	Catholic	Married (monogamous)	Informal agricultural	25-29	4	43992.39531		2042600	0	57600	617480	16600	23000	9600	121200	92500	219500	0	36400	3236480	Matched (3)	6.78206	6.78206	6	No	No	22	Informal agricultural	Catholic
5620	1	Pool de Keng	5	Kwango	Rural	Female	Child of the household head	Congolaise	Catholic	6	Yes	562001	56200103	3	5620	1	3	Bandundu	Rural	Male	Catholic	Married (monogamous)	Informal agricultural	40-44	7			2756812	175200	48000	815936	369200	0	0	0	8000	0	0	229360	4402508	Matched (3)	0	0	6	Yes	Yes	14	Informal agricultural	Catholic
5830	1	Pool de Mban	1	Equateur	Rural	Male	Child of the household head	Congolaise	Catholic	6	Yes	583001	58300104	4	5830	1	4	Equateur	Rural	Male	Catholic	Married (monogamous)	Informal agricultural	55-59	6			2756812	175200	48000	815936	369200	0	0	0	8000	0	0	229360	4402508	Matched (3)	0	0	6	Yes	Yes	7	Informal agricultural	Catholic
1150	1	Pool de Zong	116	Sud-Ubangi	Urban	Female	Spouse of the household head	Congolaise	Catholic	6	No	115001	11500102	2	1150	1	2	Equateur	Urban	Male	Catholic	Married (polygamous)	Public	40-44	5			2756812	175200	48000	815936	369200	0	0	0	8000	0	0	229360	4402508	Matched (3)	0	0	6	No	No	32	Public	Catholic
1720	1	Pool de Goma	45	Nord-Kivu	Urban	Male	Chef de ménage	Congolaise	Protestant	6	No	172001	17200101	1	1720	1	1	Nord-Kivu	Urban	Male	Protestant	Married (monogamous)	Public	35-39	6	200000		1035420	70760	0	74938	71480	37800	31200	0	0	0	48000	67200	1436798	Matched (3)	0	0	6	No	No	37	Public	Protestant
7320	1	Pool de Buta	2	Bas-Uele	Rural	Male	Chef de ménage	Congolaise	Protestant	6	No	732001	73200101	1	7320	1	1	Province Orientale	Rural	Male	Protestant	Married (monogamous)	Informal agricultural	35-39	2	11500		2756812	175200	48000	815936	369200	0	0	0	8000	0	0	229360	4402508	Matched (3)	0	0	6	No	No	39	Informal agricultural	Protestant
1900	1	Pool de Buka	77	Sud-Kivu	Urban	Female	Child of the household head	Congolaise	Protestant	6	Yes	190001	19000104	4	1900	1	4	Sud-Kivu	Urban	Male	Protestant	Married (monogamous)	Informal non-agricultural	55-59	10			2756812	175200	48000	815936	369200	0	0	0	8000	0	0	229360	4402508	Matched (3)	0	0	6	Yes	Yes	13	Informal non-agricultural	Protestant
4510	1	Mbuji-Mayi Cluster	999	Kasai-Orient	Township	Female	Other parent	Congolaise	Catholic	6	Yes	451001	45100103	3	4510	1	3	Kasaî Oriental	Urban	Male	Catholic	Single	Public	20-24	5			2756812	175200	48000	815936	369200	0	0	0	8000	0	0	229360	4402508	Matched (3)	0	0	6	Yes	Yes	14	Public	Catholic
7510	1	Pool de Goma	4	Nord-Kivu	Rural	Male	Child of the household head	Congolaise	Other Christian	6	Yes	751001	75100104	4	7510	1	4	Nord-Kivu	Rural	Male	Other Christian	Married (monogamous)	Informal agricultural	55-59	7			2756812	175200	48000	815936	369200	0	0	0	8000	0	0	229360	4402508	Matched (3)	0	0	6	Yes	Yes	12	Informal agricultural	Other Christian
4510	1	Mbuji-Mayi Cluster	999	Kasai-Orient	Township	Female	Other parent	Congolaise	Catholic	6	No	451001	45100102	2	4510	1	2	Kasaî Oriental	Urban	Male	Catholic	Single	Public	20-24	5	25000	12000	2756812	175200	48000	815936	369200	0	0	0	8000	0	0	229360	4402508	Matched (3)	0	0	6	No	No	26	Public	Catholic
6080	1	Pool de Gbad	2	Nord-Ubangi	Rural	Female	Child of the household head	Congolaise	Protestant	6	Yes	608001	60800104	4	6080	1	4	Equateur	Rural	Male	Protestant	Married (monogamous)	Informal agricultural	45-49	8			666643	0	0	264221	0	0	0	0	0	0	0	0	930864	Matched (3)	0	0	6	Yes	Yes	15	Informal agricultural	Protestant
2610	1	Pool de Kana	999	Kasai-Centra	Urban	Female	Spouse of the household head	Congolaise	Catholic	6	No	261001	26100102	2	2610	1	2	Kasaî occidental	Urban	Male	Catholic	Married (monogamous)	Public	35-39	4	138000		2756812	175200	48000	815936	369200	0	0	0	8000	0	0	229360	4402508	Matched (3)	0	0	6	No	No	28	Public	Catholic
8410	1	Pool de Kami	999	Haut-Lomami	Rural	Female	Child of the household head	Congolaise	Catholic	6	Yes	841001	84100105	5	8410	1	5	Katanga	Rural	Male	Catholic	Married (monogamous)	Informal agricultural	40-44	7			2756812	175200	48000	815936	369200	0	0	0	8000	0	0	229360	4402508	Matched (3)	0	0	6	Yes	Yes	8	Informal agricultural	Catholic
1160	1	Pool de Zong	43	Sud-Ubangi	Urban	Male	Chef de ménage	Congolaise	Protestant	6	No	116001	11600101	1	1160	1	1	Equateur	Urban	Male	Protestant	Married (monogamous)	Informal agricultural	45-49	7	0		2756812	175200	48000	815936	369200	0	0	0	8000	0	0	229360	4402508	Matched (3)	0	0	6	No	No	46	Informal agricultural	Protestant
1330	1	Pool de Gbad	3	Nord-Ubangi	Urban	Female	Child of the household head	Congolaise	Other Christian	6	Yes	133001	13300104	4	1330	1	4	Equateur	Urban	Male	Other Christian	Cohabiting	Informal agricultural	45-49	9			2756812	175200	48000	815936	369200	0	0	0	8000	0	0	229360	4402508	Matched (3)	0	0	6	Yes	Yes	11	Informal agricultural	Other Christian
5810	1	Pool de Basa	5	Equateur	Rural	Female	Child of the household head	Congolaise	Other Christian	6	Yes	581001	58100107	7	5810	1	7	Equateur	Rural	Male	Other Christian	Married (monogamous)	Informal agricultural	50-54	10			2756812	175200	48000	815936	369200	0	0	0	8000	0	0	229360	4402508	Matched (3)	0	0	6	Yes	Yes	14	Informal agricultural	Other Christian
2380	1	Mbuji-Mayi Cluster	999	Kasai-Orient	Urban	Female	Spouse of the household head	Congolaise	Other Christian	6	No	238001	23800102	2	2380	1	2	Kasaî Oriental	Urban	Male	Other Christian	Married (monogamous)	Informal non-agricultural	45-49	7	11023.64058		2756812	175200	48000	815936	369200	0	0	0	8000	0	0	229360	4402508	Matched (3)	0	0	6	No	No	37	Informal non-agricultural	Other Christian
4450	1	Mbuji-Mayi Cluster	999	Kasai-Orient	Township	Male	Child of the household head	Congolaise	Other Christian	6	No	445001	44500103	3	4450	1	3	Kasaî Oriental	Urban	Male	Other Christian	Married (monogamous)	Informal agricultural	55-59	9	12322.59418		2756812	175200	48000	815936	369200	0	0	0	8000	0	0	229360	4402508	Matched (3)	0	0	6	No	No	20	Informal agricultural	Other Christian
5880	1	Pool de Geme	2	Sud-Ubangi	Rural	Female	Child of the household head	Congolaise	Other religion	6	Yes	588001	58800103	3	5880	1	3	Equateur	Rural	Male	Other religion	Married (monogamous)	Informal agricultural	30-34	3			2756812	175200	48000	815936	369200	0	0	0	8000	0	0	229360	4402508	Matched (3)	0	0	6	Yes	Yes	13	Informal agricultural	Other religion
2780	1	Pool de Tshi	999	Kasai	Urban	Female	Spouse of the household head	Congolaise	Other religion	6	No	278001	27800102	2	2780	1	2	Kasaî occidental	Urban	Male	Other religion	Married (monogamous)	Inactive	50-54	3	10000		906160	0	22000	245200	42000	26000	0	4880	21480	84000	0	0	1351720	Matched (3)	6.214305	6.214305	6	No	No	39	Inactive	Other religion
4310	1	Pool de Kase	999	Haut-Katanga	Township	Female	Child of the household head	Congolaise	Catholic	6	Yes	431001	43100106	6	4310	1	6	Katanga	Urban	Male	Catholic	Married (monogamous)	Public	50-54	8			2756812	175200	48000	815936	369200	0	0	0	8000	0	0	229360	4402508	Matched (3)	0	0	6	Yes	Yes	8	Public	Catholic
5540	1	Pool de Fesh	5	Kwango	Rural	Female	Father or mother	Congolaise	Catholic	6	No	554001	55400107	7	5540	1	7	Bandundu	Rural	Male	Catholic	Married (monogamous)	Informal non-agricultural	40-44	7			2756812	175200	48000	815936	369200	0	0	0	8000	0	0	229360	4402508	Matched (3)	0	0	6	No	No	62	Informal non-agricultural	Catholic
3740	1	Pool de Buta	9	Bas-Uele	Township	Male	Other parent	Congolaise	Other Christian	6	Yes	374001	37400104	4	3740	1	4	Province Orientale	Urban	Male	Other Christian	Single	Inactive	20-24	4			584380	0	0	185452	18023	0	0	0	0	50400	0	0	838254	Matched (3)	6.012496	6.012496	6	Yes	Yes	15	Inactive	Other Christian
8700	1	Pool de Lika	999	Haut-Katanga	Rural	Male	Chef de ménage	Congolaise	Other Christian	6	No	870001	87000101	1	8700	1	1	Katanga	Rural	Male	Other Christian	Married (monogamous)	Public	30-34	6	56190		516060	0	5000	29734	1000	0	0	0	0	0	0	5600	557394	Matched (3)	0	0	6	No	No	30	Public	Other Christian
4080	1	Pool de Kasa	999	Lualaba	Township	Female	Spouse of the household head	Congolaise	Kimbanguist	6	No	408001	40800102	2	4080	1	2	Katanga	Urban	Male	Kimbanguist	Married (monogamous)	Informal agricultural	25-29	5	20000		2756812	175200	48000	815936	369200	0	0	0	8000	0	0	229360	4402508	Matched (3)	0	0	6	No	No	21	Informal agricultural	Kimbanguist
2220	1	Pool de Lika	999	Haut-Katanga	Urban	Male	Child of the household head	Congolaise	Other Christian	6	Yes	222001	22200104	4	2220	1	4	Katanga	Urban	Male	Other Christian	Married (monogamous)	Public	45-49	9			1027260	29280	0	0	0	0	0	0	0	0	0	0	1056540	Matched (3)	0	0	6	Yes	Yes	16	Public	Other Christian
4792	1	Pool de Mwek	24	Kasai	Township	Female	Child of the household head	Congolaise	Other Christian	6	Yes	479201	47920108	8	4792	1	8	Kasaî occidental	Urban	Male	Other Christian	Married (monogamous)	Informal non-agricultural	40-44	10			739320	0	0	79176	35380	0	0	0	0	0	0	19520	873396	Matched (3)	0	0	6	Yes	Yes	8	Informal non-agricultural	Other Christian
3030	1	Pool de Idio	11	Kwilu	Township	Female	Child of the household head	Congolaise	Other religion	6	Yes	303001	30300104	4	3030	1	4	Bandundu	Urban	Male	Catholic	Married (monogamous)	Public	60-64	7			2756812	175200	48000	815936	369200	0	0	0	8000	0	0	229360	4402508	Matched (3)	0	0	6	Yes	Yes	21	Public	Other religion
4650	1	Pool de Kabi	999	Lomami	Township	Male	Child of the household head	Congolaise	Catholic	6	Yes	465001	46500104	4	4650	1	4	Kasaî occidental	Urban	Female	Catholic	Divorced	Public	55-59	6			1385220	0	0	258198	385080	5000	0	216000	0	0	0	7320	2256818	Matched (3)	0	0	6	Yes	Yes	24	Public	Catholic
8030	1	Pool de Pun	1	Maniema	Rural	Male	Child of the household head	Congolaise	Protestant	6	Yes	803001	80300112	12	8030	1	12	Maniema	Rural	Male	Protestant	Married (monogamous)	Informal agricultural	65-69	15			2756812	175200	48000	815936	369200	0	0	0	8000	0	0	229360	4402508	Matched (3)	0	0	6	Yes	Yes	15	Informal agricultural	Protestant
2950	1	Pool de Band	33	Mai-Ndombe	Township	Male	Chef de ménage	Congolaise	Protestant	6	No	295001	29500101	1	2950	1	1	Bandundu	Urban	Male	Protestant	Married (monogamous)	Informal agricultural	35-39	8	156000	20000	2756812	175200	48000	815936	369200	0	0	0	8000	0	0	229360	4402508	Matched (3)	0	0	6	No	No	39	Informal agricultural	Protestant
5880	1	Pool de Geme	2	Sud-Ubangi	Rural	Male	Chef de ménage	Congolaise	Other religion	6	No	588001	58800101	1	5880	1	1	Equateur	Rural	Male	Other religion	Married (monogamous)	Informal agricultural	30-34	3	14407.63786		2756812	175200	48000	815936	369200	0	0	0	8000	0	0	229360	4402508	Matched (3)	0	0	6	No	No	34	Informal agricultural	Other religion
630	1	Pool de Boma	64	Kongo Centra	Urban	Male	Other parent	Congolaise	Other Christian	6	No	63001	6300107	7	630	1	7	Bas-Congo	Urban	Male	Other Christian	Cohabiting	Formal private sector	30-34	8			2756812	175200	48000	815936	369200	0	0	0	8000	0	0	229360	4402508	Matched (3)	0	0	6	No	No	17	Formal private sector	Other Christian
300	1	Kinshasa Cluster	24	Kinshasa	Urban	Male	Other parent	Congolaise	Other Christian	6	Yes	30001	3000104	4	300	1	4	Kinshasa	Urban	Male	Protestant	Married (monogamous)	Formal private sector	35-39	5			2756812	175200	48000	815936	369200	0	0	0	8000	0	0	229360	4402508	Matched (3)	0	0	6	Yes	Yes	20	Formal private sector	Other Christian
4760	1	Pool de Kana	999	Kasai-Centra	Township	Male	Other parent	Congolaise	Other Christian	6	Yes	476001	47600109	9	4760	1	9	Kasaî occidental	Urban	Male	Other Christian	Married (monogamous)	Public	60-64	15			2756812	175200	48000	815936	369200	0	0	0	8000	0	0	229360	4402508	Matched (3)	0	0	6	Yes	Yes	8	Public	Other Christian
2740	1	Pool de Tshi	999	Kasai	Urban	Female	Child of the household head	Congolaise	Other Christian	6	Yes	274001	27400105	5	2740	1	5	Kasaî occidental	Urban	Male	Other Christian	Married (monogamous)	Informal non-agricultural	40-44	6			2756812	175200	48000	815936	369200	0	0	0	8000	0	0	229360	4402508	Matched (3)	0	0	6	Yes	Yes	16	Informal non-agricultural	Other Christian
860	1	Pool de Band	23	Kwilu	Urban	Female	Child of the household head	Congolaise	Catholic	6	No	86001	8600106	6	860	1	6	Bandundu	Urban	Male	Catholic	Married (monogamous)	Informal non-agricultural	75-79	6			2756812	175200	48000	815936	369200	0	0	0	8000	0	0	229360	4402508	Matched (3)	0	0	6	No	No	25	Informal non-agricultural	Catholic
2350	1	Pool de Lubu	999	Haut-Katanga	Urban	Male	Child of the household head	Congolaise	Protestant	6	Yes	235001	23500106	6	2350	1	6	Katanga	Urban	Male	None	Divorced	Public	55-59	9			2756812	175200	48000	815936	369200	0	0	0	8000	0	0	229360	4402508	Matched (3)	0	0	6	Yes	Yes	16	Public	Protestant
3580	1	Pool de Bun	8	Ituri	Township	Female	Spouse of the household head	Congolaise	Protestant	6	No	358001	35800102	2	3580	1	2	Province Orientale	Urban	Male	Protestant	Married (monogamous)	Informal non-agricultural	40-44	12			2756812	175200	48000	815936	369200	0	0	0	8000	0	0	229360	4402508	Matched (3)	0	0	6	No	No	28	Informal non-agricultural	Protestant
2230	1	Pool de Lika	999	Haut-Katanga	Urban	Male	Child of the household head	Congolaise	Other religion	6	No	223001	22300104	4	2230	1	4	Katanga	Urban	Male	Other religion	Married (monogamous)	Informal non-agricultural	50-54	8	135000		2756812	175200	48000	815936	369200	0	0	0	8000	0	0	229360	4402508	Matched (3)	0	0	6	No	No	25	Informal non-agricultural	Other religion
2370	1	Mbuji-Mayi Cluster	999	Kasai-Orient	Urban	Male	Chef de ménage	Congolaise	Protestant	6	No	237001	23700101	1	2370	1	1	Kasaî Oriental	Urban	Male	Protestant	Married (monogamous)	Public	55-59	8	70000		2756812	175200	48000	815936	369200	0	0	0	8000	0	0	229360	4402508	Matched (3)	0	0	6	No	No	56	Public	Protestant
5630	1	Pool de Temb	1	Kwango	Rural	Female	Child of the household head	Congolaise	Other Christian	6	Yes	563001	56300106	6	5630	1	6	Bandundu	Rural	Male	Other Christian	Married (monogamous)	Informal agricultural	40-44	8			2756812	175200	48000	815936	369200	0	0	0	8000	0	0	229360	4402508	Matched (3)	0	0	6	Yes	Yes	6	Informal agricultural	Other Christian
370	1	Kinshasa Cluster	3	Kinshasa	Urban	Female	Child of the household head	Congolaise	Other Christian	6	Yes	37001	3700105	5	370	1	5	Kinshasa	Urban	Male	Catholic	Married (monogamous)	Informal non-agricultural	55-59	6			2756812	175200	48000	815936	369200	0	0	0	8000	0	0	229360	4402508	Matched (3)	0	0	6	Yes	Yes	16	Informal non-agricultural	Other Christian
2060	1	Pool de Kolw	999	Lualaba	Urban	Male	Chef de ménage	Congolaise	Protestant	6	No	206001	20600101	1	2060	1	1	Katanga	Urban	Male	Protestant	Married (monogamous)	Formal private sector	45-49	6	630000		2756812	175200	48000	815936	369200	0	0	0	8000	0	0	229360	4402508	Matched (3)	0	0	6	No	No	47	Formal private sector	Protestant
7760	1	Pool de Buka	12	Sud-Kivu	Rural	Male	Child of the household head	Congolaise	Protestant	6	Yes	776001	77600104	4	7760	1	4	Sud-Kivu	Rural	Male	Catholic	Married (monogamous)	Informal agricultural	40-44	7			2756812	175200	48000	815936	369200	0	0	0	8000	0	0	229360	4402508	Matched (3)	0	0	6	Yes	Yes	12	Informal agricultural	Protestant
390	1	Kinshasa Cluster	111	Kinshasa	Urban	Male	Child of the household head	Congolaise	Protestant	6	Yes	39001	3900104	4	390	1	4	Kinshasa	Urban	Male	Protestant	Married (monogamous)	Formal private sector	45-49	8			2756812	175200	48000	815936	369200	0	0	0	8000	0	0	229360	4402508	Matched (3)	0	0	6	Yes	Yes	11	Formal private sector	Protestant
5690	1	Pool de Mban	2	Equateur	Rural	Female	Spouse of the household head	Congolaise	Protestant	6	No	569001	56900103	3	5690	1	3	Equateur	Rural	Male	Protestant	Married (polygamous)	Informal agricultural	25-29	13	10942.60917		2756812	175200	48000	815936	369200	0	0	0	8000	0	0	229360	4402508	Matched (3)	0	0	6	No	No	25	Informal agricultural	Protestant
5060	1	Pool de Mata	2	Kongo Centra	Rural	Female	Chef de ménage	Congolaise	Protestant	6	No	506001	50600101	1	5060	1	1	Bas-Congo	Rural	Female	Protestant	Widowed	Informal agricultural	45-49	2	13500		2756812	175200	48000	815936	369200	0	0	0	8000	0	0	229360	4402508	Matched (3)	0	0	6	No	No	49	Informal agricultural	Protestant
760	1	Pool de Mata	22	Kongo Centra	Urban	Female	Child of the household head	Congolaise	Other Christian	6	Yes	76001	7600103	3	760	1	3	Bas-Congo	Urban	Male	Other Christian	Married (monogamous)	Inactive	50-54	6			2756812	175200	48000	815936	369200	0	0	0	8000	0	0	229360	4402508	Matched (3)	0	0	6	Yes	Yes	19	Inactive	Other Christian
980	1	Pool de Kikw	149	Kwilu	Urban	Female	Spouse of the household head	Congolaise	Kimbanguist	6	No	98001	9800102	2	980	1	2	Bandundu	Urban	Male	Kimbanguist	Married (monogamous)	Public	50-54	9	50000		2756812	175200	48000	815936	369200	0	0	0	8000	0	0	229360	4402508	Matched (3)	0	0	6	No	No	44	Public	Kimbanguist
8430	1	Pool de Kami	999	Haut-Lomami	Rural	Female	Other parent	Congolaise	Protestant	6	Yes	843001	84300106	6	8430	1	6	Katanga	Rural	Male	Protestant	Married (monogamous)	Informal agricultural	55-59	11			2756812	175200	48000	815936	369200	0	0	0	8000	0	0	229360	4402508	Matched (3)	0	0	6	Yes	Yes	12	Informal agricultural	Protestant
90	1	Kinshasa Cluster	22	Kinshasa	Urban	Female	Other parent	Congolaise	Other Christian	6	Yes	9001	900106					Kinshasa	Urban	Male	Catholic	Married (monogamous)	Formal private sector	50-54	8			2756812	175200	48000	815936	369200	0	0	0	8000	0	0	229360	4402508	Matched (3)	0	0	6	Yes	Yes	4	Formal private sector	Other Christian
160	1	Kinshasa Cluster	13	Kinshasa	Urban	Female	Spouse of the household head	Congolaise	Catholic	6	No	16001	1600102	2	160	1	2	Kinshasa	Urban	Male	Catholic	Married (monogamous)	Inactive	70-74	5			2756812	175200	48000	815936	369200	0	0	0	8000	0	0	229360	4402508	Matched (3)	0	0	6	No	No	56	Inactive	Catholic
9240	1	Pool de Lusa	999	Sankuru	Rural	Female	Child of the household head	Congolaise	Protestant	6	Yes	924001	92400103	3	9240	1	3	Kasaî Oriental	Rural	Female	Protestant	Widowed	Informal agricultural	40-44	9	4000		2756812	175200	48000	815936	369200	0	0	0	8000	0	0	229360	4402508	Matched (3)	0	0	6	Yes	Yes	16	Informal agricultural	Protestant
9590	1	Pool de Kana	999	Kasai-Centra	Rural	Female	Child of the household head	Congolaise	Catholic	6	Yes	959001	95900103	3	9590	1	3	Kasaî occidental	Rural	Male	Catholic	Married (polygamous)	Informal agricultural	55-59	9	0		2756812	175200	48000	815936	369200	0	0	0	8000	0	0	229360	4402508	Matched (3)	0	0	6	Yes	Yes	19	Informal agricultural	Catholic
2140	1	Pool de Lika	1	Haut-Katanga	Urban	Male	Other person	Congolaise	Other religion	6	No	214001	21400105	5	2140	1	5	Katanga	Urban	Male	Other religion	Widowed	Retired	70-74	7			2756812	175200	48000	815936	369200	0	0	0	8000	0	0	229360	4402508	Matched (3)	0	0	6	No	No	25	Retired	Other religion
1960	1	Pool de Kind	34	Maniema	Urban	Female	Other parent	Congolaise	Catholic	6	Yes	196001	19600103	3	1960	1	3	Maniema	Urban	Female	Catholic	Divorced	Public	35-39	5			2756812	175200	48000	815936	369200	0	0	0	8000	0	0	229360	4402508	Matched (3)	0	0	6	Yes	Yes	14	Public	Catholic
480	1	Kinshasa Cluster	55	Kinshasa	Urban	Male	Chef de ménage	Congolaise	Catholic	6	No	48001	4800101	1	480	1	1	Kinshasa	Urban	Male	Catholic	Married (monogamous)	Public	65-69	7	185000		2756812	175200	48000	815936	369200	0	0	0	8000	0	0	229360	4402508	Matched (3)	0	0	6	No	No	65	Public	Catholic
1360	1	Kisangani Cluster	2	Tshopo	Urban	Male	Chef de ménage	Congolaise	Other Christian	6	No	136001	13600101	1	1360	1	1	Province Orientale	Urban	Male	Other Christian	Married (monogamous)	Formal private sector	.a	3	180000		2756812	175200	48000	815936	369200	0	0	0	8000	0	0	229360	4402508	Matched (3)	0	0	6	No	No	NSP	Formal private sector	Other Christian
2220	1	Pool de Lika	999	Haut-Katanga	Urban	Female	Child of the household head	Congolaise	Other Christian	6	Yes	222001	22200105	5	2220	1	5	Katanga	Urban	Male	Other Christian	Married (monogamous)	Public	45-49	9			2756812	175200	48000	815936	369200	0	0	0	8000	0	0	229360	4402508	Matched (3)	0	0	6	Yes	Yes	13	Public	Other Christian
1410	1	Kisangani Cluster	22	Tshopo	Urban	Female	Other parent	Congolaise	Other Christian	6	Yes	141001	14100110	10	1410	1	10	Province Orientale	Urban	Male	Other Christian	Married (monogamous)	Informal non-agricultural	45-49	12			2756812	175200	48000	815936	369200	0	0	0	8000	0	0	229360	4402508	Matched (3)	0	0	6	Yes	Yes	11	Informal non-agricultural	Other Christian
880	1	Pool de Band	28	Kwilu	Urban	Male	Child of the household head	Congolaise	Other Christian	6	No	88001	8800103	3	880	1	3	Bandundu	Urban	Female	Catholic	Widowed	Inactive	40-44	4			2756812	175200	48000	815936	369200	0	0	0	8000	0	0	229360	4402508	Matched (3)	0	0	6	No	No	24	Inactive	Other Christian
3120	1	Pool de Temb	40	Kwango	Township	Male	Chef de ménage	Congolaise	Other religion	6	No	312001	31200101	1	3120	1	1	Bandundu	Urban	Male	Other religion	Married (monogamous)	Informal non-agricultural	40-44	3	135000		2756812	175200	48000	815936	369200	0	0	0	8000	0	0	229360	4402508	Matched (3)	0	0	6	No	No	40	Informal non-agricultural	Other religion
3130	1	Pool de Keng	3	Kwango	Township	Male	Child of the household head	Congolaise	Catholic	6	Yes	313001	31300103	3	3130	1	3	Bandundu	Urban	Male	Catholic	Married (monogamous)	Informal non-agricultural	55-59	12			2756812	175200	48000	815936	369200	0	0	0	8000	0	0	229360	4402508	Matched (3)	0	0	6	Yes	Yes	21	Informal non-agricultural	Catholic
7610	1	Pool de Goma	2	Nord-Kivu	Rural	Male	Child of the household head	Congolaise	Other Christian	6	Yes	761001	76100104	4	7610	1	4	Nord-Kivu	Rural	Male	Other Christian	Married (monogamous)	Informal agricultural	30-34	7			2756812	175200	48000	815936	369200	0	0	0	8000	0	0	229360	4402508	Matched (3)	0	0	6	Yes	Yes	8	Informal agricultural	Other Christian
2100	1	Pool de Kolw	999	Lualaba	Urban	Male	Child of the household head	Congolaise	Other Christian	6	Yes	210001	21000103	3	2100	1	3	Katanga	Urban	Male	Other Christian	Married (monogamous)	Formal private sector	55-59	8			2756812	175200	48000	815936	369200	0	0	0	8000	0	0	229360	4402508	Matched (3)	0	0	6	Yes	Yes	25	Formal private sector	Other Christian
630	1	Pool de Boma	64	Kongo Centra	Urban	Male	Child of the household head	Congolaise	Other Christian	6	Yes	63001	6300104	4	630	1	4	Bas-Congo	Urban	Male	Other Christian	Cohabiting	Formal private sector	30-34	8			2562000	0	0	1019350	14640	0	0	24400	0	0	0	0	3620390	Matched (3)	0	0	6	Yes	Yes	9	Formal private sector	Other Christian
2060	1	Pool de Kolw	999	Lualaba	Urban	Female	Child of the household head	Congolaise	Protestant	6	Yes	206001	20600105	5	2060	1	5	Katanga	Urban	Male	Protestant	Married (monogamous)	Formal private sector	45-49	6			2756812	175200	48000	815936	369200	0	0	0	8000	0	0	229360	4402508	Matched (3)	0	0	6	Yes	Yes	9	Formal private sector	Protestant
2090	1	Pool de Kolw	999	Lualaba	Urban	Male	Other parent	Congolaise	Catholic	6	No	209001	20900103	3	2090	1	3	Katanga	Urban	Female	Catholic	Widowed	Inactive	65-69	3	275000		2756812	175200	48000	815936	369200	0	0	0	8000	0	0	229360	4402508	Matched (3)	0	0	6	No	No	22	Inactive	Catholic
1410	1	Kisangani Cluster	22	Tshopo	Urban	Female	Other parent	Congolaise	Other Christian	6	Yes	141001	14100111	11	1410	1	11	Province Orientale	Urban	Male	Other Christian	Married (monogamous)	Informal non-agricultural	45-49	12			1046516	77836	30000	80039	118300	1000	0	0	0	0	0	78200	1431891	Matched (3)	0	0	6	Yes	Yes	6	Informal non-agricultural	Other Christian
8150	1	Pool de Kolw	999	Lualaba	Rural	Female	Child of the household head	Congolaise	Catholic	6	No	815001	81500103	3	8150	1	3	Katanga	Rural	Male	Catholic	Married (monogamous)	Informal non-agricultural	35-39	11			2756812	175200	48000	815936	369200	0	0	0	8000	0	0	229360	4402508	Matched (3)	0	0	6	No	No	16	Informal non-agricultural	Catholic
3470	1	Pool de Bas	19	Tshopo	Township	Male	Chef de ménage	Congolaise	Other religion	6	No	347001	34700101	1	3470	1	1	Province Orientale	Urban	Male	Other religion	Married (monogamous)	Informal agricultural	45-49	5	15905.86729	12024.077	2756812	175200	48000	815936	369200	0	0	0	8000	0	0	229360	4402508	Matched (3)	0	0	6	No	No	48	Informal agricultural	Other religion
3190	1	Pool de Basa	999	Equateur	Township	Male	Child of the household head	Congolaise	Other Christian	6	Yes	319001	31900108	8	3190	1	8	Equateur	Urban	Male	Other Christian	Married (monogamous)	Informal agricultural	35-39	10			2756812	175200	48000	815936	369200	0	0	0	8000	0	0	229360	4402508	Matched (3)	0	0	6	Yes	Yes	7	Informal agricultural	Other Christian
3960	1	Pool de Uvir	132	Sud-Kivu	Township	Male	Child of the household head	Congolaise	Catholic	6	No	396001	39600103	3	3960	1	3	Sud-Kivu	Urban	Female	Catholic	Married (monogamous)	Informal non-agricultural	55-59	11	90400		1117980	58560	44000	80520	52100	0	150000	0	0	0	0	24000	1527160	Matched (3)	0	0	6	No	No	25	Informal non-agricultural	Catholic
5540	1	Pool de Fesh	5	Kwango	Rural	Female	Child of the household head	Congolaise	Catholic	6	Yes	554001	55400103	3	5540	1	3	Bandundu	Rural	Male	Catholic	Married (monogamous)	Informal non-agricultural	40-44	7			2756812	175200	48000	815936	369200	0	0	0	8000	0	0	229360	4402508	Matched (3)	0	0	6	Yes	Yes	10	Informal non-agricultural	Catholic
7890	1	Pool de Kibo	4	Maniema	Rural	Female	Spouse of the household head	Congolaise	Other Christian	6	No	789001	78900102	2	7890	1	2	Maniema	Rural	Male	Other Christian	Married (monogamous)	Informal agricultural	30-34	6	10000		2756812	175200	48000	815936	369200	0	0	0	8000	0	0	229360	4402508	Matched (3)	0	0	6	No	No	26	Informal agricultural	Other Christian
3490	1	Pool de Bas	3	Tshopo	Township	Female	Child of the household head	Congolaise	Other religion	6	Yes	349001	34900106	6	3490	1	6	Province Orientale	Urban	Male	Other religion	Married (monogamous)	Public	45-49	10			2067900	146400	493300	554786	366000	12200	24400	390400	12400	0	134200	217160	4419146	Matched (3)	0	0	6	Yes	Yes	10	Public	Other religion
3613	1	Isiro Cluster	2	Haut-Uele	Township	Male	Other parent	Congolaise	Catholic	6	Yes	361301	36130104	4	3613	1	4	Province Orientale	Urban	Male	Catholic	Cohabiting	Informal agricultural	30-34	5			326960	2440	47400	0	35800	4000	0	0	1000	0	0	16300	433900	Matched (3)	0	0	6	Yes	Yes	17	Informal agricultural	Catholic
1850	1	Pool de Buka	155	Sud-Kivu	Urban	Female	Child of the household head	Congolaise	Protestant	6	Yes	185001	18500104	4	1850	1	4	Sud-Kivu	Urban	Male	Protestant	Married (monogamous)	Public	60-64	10			2756812	175200	48000	815936	369200	0	0	0	8000	0	0	229360	4402508	Matched (3)	0	0	6	Yes	Yes	27	Public	Protestant
980	1	Pool de Kikw	149	Kwilu	Urban	Male	Chef de ménage	Congolaise	Kimbanguist	6	No	98001	9800101	1	980	1	1	Bandundu	Urban	Male	Kimbanguist	Married (monogamous)	Public	50-54	9	51777.72431		2756812	175200	48000	815936	369200	0	0	0	8000	0	0	229360	4402508	Matched (3)	0	0	6	No	No	54	Public	Kimbanguist
6260	1	Pool de Gbad	15	Nord-Ubangi	Rural	Female	Child of the household head	Congolaise	Other Christian	6	Yes	626001	62600104	4	6260	1	4	Equateur	Rural	Male	Other Christian	Married (monogamous)	Informal non-agricultural	40-44	7			2756812	175200	48000	815936	369200	0	0	0	8000	0	0	229360	4402508	Matched (3)	0	0	6	Yes	Yes	17	Informal non-agricultural	Other Christian
3840	1	Pool de Beni	2	Nord-Kivu	Township	Male	Child of the household head	Congolaise	Catholic	6	Yes	384001	38400104	4	3840	1	4	Nord-Kivu	Urban	Male	Catholic	Married (monogamous)	Informal non-agricultural	30-34	6			2756812	175200	48000	815936	369200	0	0	0	8000	0	0	229360	4402508	Matched (3)	0	0	6	Yes	Yes	7	Informal non-agricultural	Catholic
6970	1	Pool de Bun	2	Ituri	Rural	Male	Other parent	Congolaise	Catholic	6	Yes	697001	69700110	10	6970	1	10	Province Orientale	Rural	Male	Catholic	Married (polygamous)	Informal agricultural	55-59	11			2756812	175200	48000	815936	369200	0	0	0	8000	0	0	229360	4402508	Matched (3)	0	0	6	Yes	Yes	8	Informal agricultural	Catholic
4550	1	Pool de Lodj	12	Sankuru	Township	Male	Chef de ménage	Congolaise	Other religion	6	No	455001	45500101	1	4550	1	1	Kasaî Oriental	Urban	Male	Other religion	Married (monogamous)	Informal non-agricultural	25-29	3	23000		2756812	175200	48000	815936	369200	0	0	0	8000	0	0	229360	4402508	Matched (3)	0	0	6	No	No	27	Informal non-agricultural	Other religion
710	1	Pool de Mata	214	Kongo Centra	Urban	Male	Child of the household head	Congolaise	Other Christian	6	Yes	71001	7100106	6	710	1	6	Bas-Congo	Urban	Male	Catholic	Married (monogamous)	Public	55-59	10			973200	0	0	354603	0	0	0	0	0	0	0	0	1327803	Matched (3)	0	0	6	Yes	Yes	12	Public	Other Christian
590	1	Pool de Boma	18	Kongo Centra	Urban	Male	Child of the household head	Congolaise	Catholic	6	Yes	59001	5900103	3	590	1	3	Bas-Congo	Urban	Male	Catholic	Married (monogamous)	Chomeurs	45-49	6			2756812	175200	48000	815936	369200	0	0	0	8000	0	0	229360	4402508	Matched (3)	0	0	6	Yes	Yes	17	Chomeurs	Catholic
8910	1	Mbuji-Mayi Cluster	999	Kasai-Orient	Rural	Male	Child of the household head	Congolaise	Other Christian	6	Yes	891001	89100103	3	8910	1	3	Kasaî Oriental	Rural	Male	Other Christian	Married (monogamous)	Informal agricultural	40-44	8			1296860	17080	0	82248	48800	0	195200	0	0	0	0	0	1640188	Matched (3)	0	0	6	Yes	Yes	13	Informal agricultural	Other Christian
2370	1	Mbuji-Mayi Cluster	999	Kasai-Orient	Urban	Female	Child of the household head	Congolaise	Protestant	6	Yes	237001	23700105	5	2370	1	5	Kasaî Oriental	Urban	Male	Protestant	Married (monogamous)	Public	55-59	8			2756812	175200	48000	815936	369200	0	0	0	8000	0	0	229360	4402508	Matched (3)	0	0	6	Yes	Yes	16	Public	Protestant
2910	1	Pool de INo	31	Mai-Ndombe	Township	Female	Child of the household head	Congolaise	Catholic	6	Yes	291001	29100103	3	2910	1	3	Bandundu	Urban	Male	Catholic	Married (monogamous)	Informal non-agricultural	55-59	8			1221220	0	45000	694354	11367	485600	12800	14400	45000	76000	0	0	2605741	Matched (3)	2.916637	2.916637	6	Yes	Yes	30	Informal non-agricultural	Catholic
4170	1	Pool de Kami	999	Haut-Lomami	Township	Male	Chef de ménage	Congolaise	Other Christian	6	No	417001	41700101	1	4170	1	1	Katanga	Urban	Male	Other Christian	Widowed	Public	60-64	4	6000		2756812	175200	48000	815936	369200	0	0	0	8000	0	0	229360	4402508	Matched (3)	0	0	6	No	No	61	Public	Other Christian
3670	1	Pool de Buta	9	Bas-Uele	Township	Male	Other person	Congolaise	Musulmane	6	Yes	367001	36700102	2	3670	1	2	Province Orientale	Urban	Female	Musulmane	Widowed	Informal non-agricultural	30-34	6			2756812	175200	48000	815936	369200	0	0	0	8000	0	0	229360	4402508	Matched (3)	0	0	6	Yes	Yes	9	Informal non-agricultural	Musulmane
3300	1	Pool de Gbad	9	Nord-Ubangi	Township	Female	Child of the household head	Congolaise	Other Christian	6	Yes	330001	33000111	11	3300	1	11	Equateur	Urban	Male	Catholic	Married (monogamous)	Informal agricultural	45-49	14			2756812	175200	48000	815936	369200	0	0	0	8000	0	0	229360	4402508	Matched (3)	0	0	6	Yes	Yes	6	Informal agricultural	Other Christian
2690	1	Pool de Kana	999	Kasai-Centra	Urban	Male	Child of the household head	Congolaise	Other Christian	6	No	269001	26900102	2	2690	1	2	Kasaî occidental	Urban	Female	Other Christian	Widowed	Chomeurs	45-49	8	11665.93777		506760	0	0	21960	2440	0	0	0	0	0	0	45840	577000	Matched (3)	0	0	6	No	No	32	Chomeurs	Other Christian
190	1	Kinshasa Cluster	2	Kinshasa	Urban	Male	Chef de ménage	Congolaise	Catholic	6	No	19001	1900101	1	190	1	1	Kinshasa	Urban	Male	Catholic	Married (monogamous)	Public	45-49	9	200895.7935		406940	37820	0	123862	28000	9000	0	0	0	0	0	0	605622	Matched (3)	0	0	6	No	No	47	Public	Catholic
5790	1	Pool de Basa	2	Equateur	Rural	Male	Child of the household head	Congolaise	Other Christian	6	Yes	579001	57900104	4	5790	1	4	Equateur	Rural	Male	Other Christian	Married (monogamous)	Informal non-agricultural	45-49	7			1041880	0	94000	557840	95520	206800	0	10000	0	114000	0	0	2120040	Matched (3)	5.377257	5.377257	6	Yes	Yes	14	Informal non-agricultural	Other Christian
3453	1	Pool de Bas	2	Tshopo	Township	Female	Child of the household head	Congolaise	Catholic	6	Yes	345301	34530107	7	3453	1	7	Province Orientale	Urban	Male	Catholic	Married (monogamous)	Informal agricultural	45-49	8			2756812	175200	48000	815936	369200	0	0	0	8000	0	0	229360	4402508	Matched (3)	0	0	6	Yes	Yes	5	Informal agricultural	Catholic
3210	1	Pool de Basa	7	Equateur	Township	Male	Other parent	Congolaise	Musulmane	6	Yes	321001	32100103	3	3210	1	3	Equateur	Urban	Male	Musulmane	Cohabiting	Public	60-64	4			2756812	175200	48000	815936	369200	0	0	0	8000	0	0	229360	4402508	Matched (3)	0	0	6	Yes	Yes	17	Public	Musulmane
6090	1	Pool de Gbad	2	Nord-Ubangi	Rural	Male	Child of the household head	Congolaise	Protestant	6	Yes	609001	60900103	3	6090	1	3	Equateur	Rural	Male	Protestant	Married (monogamous)	Informal agricultural	45-49	7			451888	0	60000	201942	2000	3000	0	0	0	0	0	0	718830	Matched (3)	0	0	6	Yes	Yes	19	Informal agricultural	Protestant
1610	1	Pool de Beni	2	Nord-Kivu	Urban	Female	Child of the household head	Congolaise	Protestant	6	Yes	161001	16100103	3	1610	1	3	Nord-Kivu	Urban	Female	Protestant	Single	Inactive	25-29	3			2756812	175200	48000	815936	369200	0	0	0	8000	0	0	229360	4402508	Matched (3)	0	0	6	Yes	Yes	7	Inactive	Protestant
9010	1	Mbuji-Mayi Cluster	999	Kasai-Orient	Rural	Male	Child of the household head	Congolaise	Other Christian	6	Yes	901001	90100108	8	9010	1	8	Kasaî Oriental	Rural	Male	Other Christian	Married (monogamous)	Informal agricultural	40-44	12	7362.34155		2756812	175200	48000	815936	369200	0	0	0	8000	0	0	229360	4402508	Matched (3)	0	0	6	Yes	Yes	10	Informal agricultural	Other Christian
8140	1	Pool de Kasa	999	Lualaba	Rural	Female	Child of the household head	Congolaise	Other Christian	6	Yes	814001	81400106	6	8140	1	6	Katanga	Rural	Male	Other Christian	Married (monogamous)	Public	45-49	6			2756812	175200	48000	815936	369200	0	0	0	8000	0	0	229360	4402508	Matched (3)	0	0	6	Yes	Yes	14	Public	Other Christian
9220	1	Pool de Lodj	6	Sankuru	Rural	Male	Child of the household head	Congolaise	Catholic	6	Yes	922001	92200108	8	9220	1	8	Kasaî Oriental	Rural	Male	Catholic	Married (monogamous)	Public	65-69	10			2756812	175200	48000	815936	369200	0	0	0	8000	0	0	229360	4402508	Matched (3)	0	0	6	Yes	Yes	10	Public	Catholic
6380	1	Pool de Lisa	4	Mongala	Rural	Female	Spouse of the household head	Congolaise	Other Christian	6	No	638001	63800102	2	6380	1	2	Equateur	Rural	Male	Other Christian	Married (monogamous)	Informal agricultural	35-39	7	180000		2756812	175200	48000	815936	369200	0	0	0	8000	0	0	229360	4402508	Matched (3)	0	0	6	No	No	36	Informal agricultural	Other Christian
2150	1	Pool de Lika	999	Haut-Katanga	Urban	Male	Other parent	Congolaise	Protestant	6	No	215001	21500102	2	2150	1	2	Katanga	Urban	Male	Catholic	Single	Inactive	20-24	2	225000		2756812	175200	48000	815936	369200	0	0	0	8000	0	0	229360	4402508	Matched (3)	0	0	6	No	No	28	Inactive	Protestant
9610	1	Pool de Kana	999	Kasai-Centra	Rural	Female	Child of the household head	Congolaise	Catholic	6	Yes	961001	96100103	3	9610	1	3	Kasaî occidental	Rural	Male	Catholic	Married (monogamous)	Informal agricultural	45-49	6			795440	0	0	73076	97600	0	0	0	0	0	0	0	966116	Matched (3)	0	0	6	Yes	Yes	12	Informal agricultural	Catholic
1460	1	Pool de Beni	2	Nord-Kivu	Urban	Female	Chef de ménage	Congolaise	Catholic	6	No	146001	14600101	1	1460	1	1	Nord-Kivu	Urban	Female	Catholic	Single	Informal non-agricultural	25-29	2	54165.45207		139080	23790	6000	97096	83710	4000	0	0	0	7000	0	27660	388336	Matched (3)	1.802561	1.802561	6	No	No	27	Informal non-agricultural	Catholic
6220	1	Pool de Gbad	19	Nord-Ubangi	Rural	Male	Chef de ménage	Congolaise	Catholic	6	No	622001	62200101	1	6220	1	1	Equateur	Rural	Male	Catholic	Married (polygamous)	Public	40-44	13	45000		779800	146400	0	99327	42700	0	0	0	0	0	0	0	1068227	Matched (3)	0	0	6	No	No	42	Public	Catholic
8960	1	Mbuji-Mayi Cluster	999	Kasai-Orient	Rural	Female	Spouse of the household head	Congolaise	None	6	No	896001	89600102	2	8960	1	2	Kasaî Oriental	Rural	Male	Other Christian	Married (polygamous)	Informal agricultural	50-54	8	10000		2756812	175200	48000	815936	369200	0	0	0	8000	0	0	229360	4402508	Matched (3)	0	0	6	No	No	44	Informal agricultural	None
8190	1	Pool de Kasa	999	Lualaba	Rural	Male	Other parent	Congolaise	Protestant	6	Yes	819001	81900108	8	8190	1	8	Katanga	Rural	Male	Protestant	Married (monogamous)	Informal agricultural	60-64	8			935888	207400	12600	126302	10400	22260	0	0	10400	0	0	2400	1327650	Matched (3)	0	0	6	Yes	Yes	10	Informal agricultural	Protestant
1310	1	Pool de Gbad	19	Nord-Ubangi	Urban	Male	Chef de ménage	Congolaise	Missing	6	No	131001	13100101	1	1310	1	1	Equateur	Urban	Male	Missing	Married (monogamous)	Public	30-34	4	90000	50000	2756812	175200	48000	815936	369200	0	0	0	8000	0	0	229360	4402508	Matched (3)	0	0	6	No	No	34	Public	Missing
2310	1	Pool de Lubu	54	Haut-Katanga	Urban	Male	Child of the household head	Congolaise	Catholic	6	Yes	231001	23100105	5	2310	1	5	Katanga	Urban	Male	Catholic	Married (monogamous)	Informal non-agricultural	60-64	11			2756812	175200	48000	815936	369200	0	0	0	8000	0	0	229360	4402508	Matched (3)	0	0	6	Yes	Yes	17	Informal non-agricultural	Catholic
4670	1	Pool de Mwen	999	Lomami	Township	Female	Child of the household head	Congolaise	Other Christian	6	Yes	467001	46700103	3	4670	1	3	Kasaî Oriental	Urban	Male	Other Christian	Married (monogamous)	Informal non-agricultural	35-39	5			2756812	175200	48000	815936	369200	0	0	0	8000	0	0	229360	4402508	Matched (3)	0	0	6	Yes	Yes	11	Informal non-agricultural	Other Christian
7880	1	Pool de Kibo	1	Maniema	Rural	Female	Spouse of the household head	Pays limitro	Catholic	6	No	788001	78800102	2	7880	1	2	Maniema	Rural	Male	Catholic	Married (polygamous)	Informal agricultural	25-29	5	5000		2756812	175200	48000	815936	369200	0	0	0	8000	0	0	229360	4402508	Matched (3)	0	0	6	No	No	26	Informal agricultural	Catholic
1070	1	Pool de Mban	10	Equateur	Urban	Female	Chef de ménage	Congolaise	Other religion	6	No	107001	10700101	1	1070	1	1	Equateur	Urban	Female	Other religion	Divorced	Informal non-agricultural	35-39	7	25000		2756812	175200	48000	815936	369200	0	0	0	8000	0	0	229360	4402508	Matched (3)	0	0	6	No	No	37	Informal non-agricultural	Other religion
710	1	Pool de Mata	214	Kongo Centra	Urban	Female	Child of the household head	Congolaise	Other Christian	6	No	71001	7100103	3	710	1	3	Bas-Congo	Urban	Male	Catholic	Married (monogamous)	Public	55-59	10			2756812	175200	48000	815936	369200	0	0	0	8000	0	0	229360	4402508	Matched (3)	0	0	6	No	No	31	Public	Other Christian
4660	1	Pool de Kabi	999	Lomami	Township	Female	Child of the household head	Congolaise	Catholic	6	No	466001	46600106	6	4660	1	6	Kasaî occidental	Urban	Male	Musulmane	Married (monogamous)	Inactive	65-69	6			2756812	175200	48000	815936	369200	0	0	0	8000	0	0	229360	4402508	Matched (3)	0	0	6	No	No	25	Inactive	Catholic
2480	1	Mbuji-Mayi Cluster	999	Kasai-Orient	Urban	Male	Child of the household head	Congolaise	Other Christian	6	No	248001	24800104	4	2480	1	4	Kasaî Oriental	Urban	Male	Other Christian	Married (monogamous)	Formal private sector	60-64	6			2756812	175200	48000	815936	369200	0	0	0	8000	0	0	229360	4402508	Matched (3)	0	0	6	No	No	22	Formal private sector	Other Christian
4530	1	Pool de Lodj	11	Sankuru	Township	Female	Spouse of the household head	Congolaise	Catholic	6	No	453001	45300102	2	4530	1	2	Kasaî Oriental	Urban	Male	Catholic	Married (polygamous)	Informal agricultural	55-59	3	21000		2756812	175200	48000	815936	369200	0	0	0	8000	0	0	229360	4402508	Matched (3)	0	0	6	No	No	48	Informal agricultural	Catholic
5100	1	Pool de Band	6	Mai-Ndombe	Rural	Female	Child of the household head	Congolaise	Catholic	6	Yes	510001	51000106	6	5100	1	6	Bandundu	Rural	Male	Protestant	Married (monogamous)	Public	60-64	6			2756812	175200	48000	815936	369200	0	0	0	8000	0	0	229360	4402508	Matched (3)	0	0	6	Yes	Yes	7	Public	Catholic
9230	1	Pool de Lusa	999	Sankuru	Rural	Female	Child of the household head	Congolaise	Other Christian	6	Yes	923001	92300108	8	9230	1	8	Kasaî Oriental	Rural	Male	Other Christian	Married (monogamous)	Informal agricultural	50-54	9			2756812	175200	48000	815936	369200	0	0	0	8000	0	0	229360	4402508	Matched (3)	0	0	6	Yes	Yes	8	Informal agricultural	Other Christian
2050	1	Pool de Kolw	999	Lualaba	Urban	Male	Chef de ménage	Congolaise	Catholic	6	No	205001	20500101	1	2050	1	1	Katanga	Urban	Male	Catholic	Married (monogamous)	Inactive	75-79	3			237900	0	0	0	7320	0	0	0	0	0	0	0	245220	Matched (3)	0	0	6	No	No	75	Inactive	Catholic
5600	1	Pool de Keng	20	Kwango	Rural	Female	Chef de ménage	Congolaise	Other Christian	6	No	560001	56000101	1	5600	1	1	Bandundu	Rural	Female	Other Christian	Married (polygamous)	Informal agricultural	25-29	3	15000		2756812	175200	48000	815936	369200	0	0	0	8000	0	0	229360	4402508	Matched (3)	0	0	6	No	No	27	Informal agricultural	Other Christian
4062	1	Pool de Kolw	999	Lualaba	Township	Male	Chef de ménage	Congolaise	Protestant	6	No	406201	40620101	1	4062	1	1	Katanga	Urban	Male	Protestant	Married (monogamous)	Informal non-agricultural	30-34	7	378000		2756812	175200	48000	815936	369200	0	0	0	8000	0	0	229360	4402508	Matched (3)	0	0	6	No	No	32	Informal non-agricultural	Protestant
6080	1	Pool de Gbad	2	Nord-Ubangi	Rural	Male	Child of the household head	Congolaise	Protestant	6	Yes	608001	60800103	3	6080	1	3	Equateur	Rural	Male	Protestant	Married (monogamous)	Informal agricultural	45-49	8			2756812	175200	48000	815936	369200	0	0	0	8000	0	0	229360	4402508	Matched (3)	0	0	6	Yes	Yes	17	Informal agricultural	Protestant
2930	1	Pool de INo	48	Mai-Ndombe	Township	Female	Spouse of the household head	Congolaise	Catholic	6	No	293001	29300102	2	2930	1	2	Bandundu	Urban	Male	Other religion	Married (monogamous)	Public	40-44	9	30000		582550	0	76250	112903	21350	0	0	0	12200	0	0	0	805253	Matched (3)	0	0	6	No	No	36	Public	Catholic
4240	1	Pool de Kale	999	Tanganyka	Township	Male	Chef de ménage	Congolaise	Protestant	6	No	424001	42400101	1	4240	1	1	Katanga	Urban	Male	Protestant	Married (monogamous)	Chomeurs	30-34	5			2756812	175200	48000	815936	369200	0	0	0	8000	0	0	229360	4402508	Matched (3)	0	0	6	No	No	33	Chomeurs	Protestant
3160	1	Pool de Keng	4	Kwango	Township	Male	Child of the household head	Congolaise	Other Christian	6	Yes	316001	31600105	5	3160	1	5	Bandundu	Urban	Female	Other Christian	Married (polygamous)	Informal agricultural	40-44	8			2756812	175200	48000	815936	369200	0	0	0	8000	0	0	229360	4402508	Matched (3)	0	0	6	Yes	Yes	17	Informal agricultural	Other Christian
6800	1	Pool de Bas	4	Tshopo	Rural	Female	Father or mother	Congolaise	Catholic	6	No	680001	68000102	2	6800	1	2	Province Orientale	Rural	Male	Catholic	Divorced	Informal agricultural	45-49	2	6000		2756812	175200	48000	815936	369200	0	0	0	8000	0	0	229360	4402508	Matched (3)	0	0	6	No	No	80	Informal agricultural	Catholic
7560	1	Pool de Beni	2	Nord-Kivu	Rural	Male	Chef de ménage	Congolaise	Protestant	6	No	756001	75600101	1	7560	1	1	Nord-Kivu	Rural	Male	Protestant	Married (monogamous)	Informal non-agricultural	25-29	5	13950		1079212	0	0	88294	58560	0	0	65880	0	0	36600	25620	1354166	Matched (3)	0	0	6	No	No	28	Informal non-agricultural	Protestant
4570	1	Pool de Lusa	999	Sankuru	Township	Female	Child of the household head	Congolaise	Catholic	6	Yes	457001	45700105	5	4570	1	5	Kasaî Oriental	Urban	Male	Catholic	Married (polygamous)	Public	40-44	8			2756812	175200	48000	815936	369200	0	0	0	8000	0	0	229360	4402508	Matched (3)	0	0	6	Yes	Yes	12	Public	Catholic
7970	1	Pool de Kind	3	Maniema	Rural	Male	Child of the household head	Congolaise	Catholic	6	Yes	797001	79700108	8	7970	1	8	Maniema	Rural	Male	Catholic	Married (polygamous)	Inactive	50-54	11			2756812	175200	48000	815936	369200	0	0	0	8000	0	0	229360	4402508	Matched (3)	0	0	6	Yes	Yes	10	Inactive	Catholic
6500	1	Pool de Boku	2	Tshuapa	Rural	Male	Child of the household head	Congolaise	Catholic	6	Yes	650001	65000107	7	6500	1	7	Equateur	Rural	Male	Catholic	Married (monogamous)	Public	35-39	11			2756812	175200	48000	815936	369200	0	0	0	8000	0	0	229360	4402508	Matched (3)	0	0	6	Yes	Yes	9	Public	Catholic
3190	1	Pool de Basa	999	Equateur	Township	Male	Chef de ménage	Congolaise	Other Christian	6	No	319001	31900101	1	3190	1	1	Equateur	Urban	Male	Other Christian	Married (monogamous)	Informal agricultural	35-39	10	5000		1806820	0	0	612346	0	0	0	0	0	0	0	0	2419166	Matched (3)	0	0	6	No	No	38	Informal agricultural	Other Christian
4690	1	Pool de Mwen	999	Lomami	Township	Female	Child of the household head	Congolaise	Other religion	6	Yes	469001	46900109	9	4690	1	9	Kasaî Oriental	Urban	Male	Other religion	Married (monogamous)	Public	35-39	9			2756812	175200	48000	815936	369200	0	0	0	8000	0	0	229360	4402508	Matched (3)	0	0	6	Yes	Yes	13	Public	Other religion
2620	1	Pool de Kana	999	Kasai-Centra	Urban	Male	Child of the household head	Congolaise	Catholic	6	Yes	262001	26200102	2	2620	1	2	Kasaî occidental	Urban	Female	Catholic	Widowed	Informal non-agricultural	40-44	3			2756812	175200	48000	815936	369200	0	0	0	8000	0	0	229360	4402508	Matched (3)	0	0	6	Yes	Yes	12	Informal non-agricultural	Catholic
6090	1	Pool de Gbad	2	Nord-Ubangi	Rural	Female	Child of the household head	Congolaise	Protestant	6	Yes	609001	60900104	4	6090	1	4	Equateur	Rural	Male	Protestant	Married (monogamous)	Informal agricultural	45-49	7			2756812	175200	48000	815936	369200	0	0	0	8000	0	0	229360	4402508	Matched (3)	0	0	6	Yes	Yes	15	Informal agricultural	Protestant
840	1	Pool de Band	36	Kwilu	Urban	Female	Child of the household head	Congolaise	Protestant	6	Yes	84001	8400103	3	840	1	3	Bandundu	Urban	Male	Protestant	Married (monogamous)	Informal non-agricultural	40-44	5			2756812	175200	48000	815936	369200	0	0	0	8000	0	0	229360	4402508	Matched (3)	0	0	6	Yes	Yes	12	Informal non-agricultural	Protestant
[truncated: 34,860 more rows]
[truncated: 39 more columns]
