# Supplementary material
Source: Research Square preprint supplement (doi:10.21203/rs.3.rs-9317449/v1)
Supplement: Supplementary file 4 [file d3e3696da85fb7c8275d5440.docx]

**Variable Construction and Data Transformations**

**Construction of Key Variables**

Access to Primary Education: Binary variable equal to 1 if the child is enrolled in primary school at age six, and 0 otherwise.

Women’s and Men’s Decision-Making Power:

where is the woman’s bargaining power, is the woman’s income, and is the man’s income. Men’s power is defined as (1 − ).

Intra-household Resource Allocation:

=

This measures the share of household resources devoted to education.

Women’s decision-making power is measured by the share of female income in total household income. Intra-household allocation is proxied by the share of education spending in total expenditure. Squared bargaining power terms are included to capture non-linear effects, and key variables are log-transformed and standardized for comparability.

**Construction of Control Variables**

Household characteristics include age of household head (years), household size, and place of residence (urban = 1, rural = 0).

Socioeconomic characteristics include education level (educated = 1), marital status, and religion (categorical variables).

**Data Transformations**

**Income aggregation:** Individual incomes from primary and secondary activities were summed to obtain total income for each spouse.

**Couple income:** Defined as the sum of both spouses’ incomes.

**Sample restriction:** The analysis is restricted to households with children aged six and where both parents report income, ensuring comparability in bargaining power measurement.

**Matching procedure:** Individual-level data were merged with household-level expenditure data using the household identification variable (HHID).

**Missing values:** Observations with missing key variables were excluded from the analysis.

**Consistency and Robustness Checks**

Consistency checks were performed on income and expenditure data. Outliers and implausible values were examined and excluded where necessary.
